# Supplementary material for: A microRNA–microRNA crosstalk network inferred from genome-wide single nucleotide polymorphism variants in natural populations of Arabidopsis thaliana
Source: Front Plant Sci. 2022 Aug 26;13:958520. doi: 10.3389/fpls.2022.958520 (PMC9484463; doi:10.3389/fpls.2022.958520)
Supplement: Supplementary file 1 [file Data_Sheet_1.xlsx]

## Sheet: Table S1
Supplementary Table S1. Number of variants before and after removing singletons.
Chr. id	# of original variants	# of kept variants	% of kept variants
1	3131891	2104566	0.67
2	2244355	1505068	0.67
3	2650671	1794741	0.68
4	2125788	1425786	0.67
5	2731148	1830810	0.67
Total	12883853	8660971	0.67

## Sheet: Table S2
Supplementary Table S2. List of public datasets and softwares used in this study.
Datasets
Description	Source	URL	Referencea
miRNA annotation in Aradopsis and other species	miRBase22	https://www.mirbase.org/ftp/22/	(Griffiths-Jones, 2004; Kozomara et al., 2019)
Genome sequence (Col-0)	TAIR10	https://www.arabidopsis.org/
Genome annotation (Col-0)	Araport11 (June 2016)	https://www.arabidopsis.org/
Variants in 1,135 ecotypes	1001 Genomes	https://1001genomes.org/data/GMI-MPI/releases/v3.1/	(The 1001 Genomes Consortium, 2016)
Orthologs gene families	PLAZA 5.0 dicots	https://bioinformatics.psb.ugent.be/plaza/versions/plaza_v5_dicots/	(Van Bel et al., 2018)
miRNA expression in 27 different organ/tissue types (Col-0)	GSE79414 (Supplementary Table S2 in Xu et al., 2008)	https://static-content.springer.com/esm/art%3A10.1007%2Fs11427-017-9199-1/MediaObjects/11427_2017_9199_MOESM8_ESM.pdf	(Xu et al., 2018)
miRNA expression in a wide range of abiotic stress responses (Col-0)	GSE66599 (NCBI GEO)	https://www.ncbi.nlm.nih.gov/geo/query/acc.cgi?acc=GSE66599	(Barciszewska-Pacak et al., 2015)
Degradome-seq (Wild-type Col-0)	GSE11007 (NCBI GEO)	GSM278333 (inflorescence)	(Addo-Quaye et al., 2008)
		GSM278334 (inflorescence)
		GSM278335 (inflorescence)
		GSM278370 (seedling)
	GSE11070 (NCBI GEO)	GSM284751 (inflorescence)	(Gregory et al., 2008)
	GSE11094 (NCBI GEO)	GSM280226 (inflorescence)	(German et al., 2008)
	GSE52342 (NCBI GEO)	GSM1263708 (inflorescence)	(Creasey et al., 2014)
	GSE77549 (NCBI GEO)	GSM2054358 (11-day-old seedling)	(Hou et al., 2016)
		GSM2054359 (inflorescence)
		GSM2253889 (inflorescence rep1)
		GSM2253892 (inflorescence rep2)
	GSE55151 (NCBI GEO)	GSM1330569 (young leaf)	(Thatcher et al., 2015)
		GSM1330570 (mature leaf)
		GSM1330571 (early senescence leaf biorep 1)
		GSM1330572 (late senescence leaf biorep 1)
		GSM1330573 (early senescence leaf biorep 2)
		GSM1330574 (late senescence leaf biorep 2)
	GSE84728 (NCBI GEO)	GSM2249228 (seedling)
Stress-responsive miRNAs	PncStress	http://bis.zju.edu.cn/PncStress/	(Wu et al., 2020)
Stress-responsive genes	PSGDb (Plant Stress Gene Database)	http://bis.zju.edu.cn/PSGDb/
	STIFDB2 (Stress Responsive Transcription Factor Database)	http://caps.ncbs.res.in/stifdb2/	(Naika et al., 2013)
	Plant Stress Gene Database	http://ccbb.jnu.ac.in/stressgenes/frontpage.html
	PRGdb 4.0 (Pathogen Receptor Genes)	http://prgdb.org/prgdb4/	(Calle Garcia et al., 2021)
	DroughtDB (Drought Stress Gene Database)	https://pgsb.helmholtz-muenchen.de/droughtdb/	(Alter et al., 2015
Climatic data	WorldClim 2.1 (extracted using the raster package in R)	https://www.worldclim.org/
Softwares
Description	Software	URL	Reference
Network visulization	Cytoscape	https://cytoscape.org/	(Shannon et al., 2003)
Functional enrichment analysis	clusterProfiler v3.18.1 in R	https://bioconductor.org/packages/release/bioc/html/clusterProfiler.html	(Yu et al., 2012; Wu et al., 2021)
miRNA target prediction	TargetFinder	https://github.com/carringtonlab/TargetFinder	(Fahlgren et al., 2007)
	PsRobot v1.2	http://omicslab.genetics.ac.cn/psRobot/downloads.php	(Wu et al., 2012)
Principal component analysis	FactoMineR library in R	https://cran.r-project.org/web/packages/FactoMineR/index.html
Identification of miRNA cleavage sites	CleaveLand4	https://github.com/MikeAxtell/CleaveLand4	(Addo-Quaye et al., 2009
a Supplementary Refereces are listed in the 'Supplementary Texts' file.

## Sheet: Table S3
Supplementary Table S3. 9,036 miRNA-target regulatory pairs including 371 miRNAs and 6,860 transcripts.
Column description
	General fate: including K, KL and G
	Num of ecotypes in the regulation fate profile: for example, 'k:422,l:106' means the miRNA-target regulation is kept in 422 ecotypes and lost in another 106 ecotypes.
	Number of Col-0 binding sites validated by degradome: the number of degradome sequencing data-based miRNA target binding sites in Col-0 genome.
	Col-0 binding sites validated by degradome (start-end~Nlibraries|...): miRNA binding sites are deliminated by '|', and individual binding site is labeled as 'start-end~Ndegradome_libraries'.
miRNA	Transcript ID	General fate	Num of ecotypes in the regulation fate profile	Conservation of miRNA	Age of miRNA	Conservation of transcript	Age of transcript	Number of Col-0 binding sites validated by degradome	Col-0 binding sites validated by degradome (start-end~Nlibraries|...)
ath-miR10515	AT2G20610.1	K	k:320	non-conserved	Arabidopsis thaliana	conserved	Green plants
ath-miR10515	AT2G20610.2	K	k:277	non-conserved	Arabidopsis thaliana	conserved	Green plants
ath-miR156a-5p	AT1G25500.2	K	k:1125	conserved	Land plants	conserved	Green plants
ath-miR156a-5p	AT1G25500.3	K	k:1131	conserved	Land plants	conserved	Green plants
ath-miR156a-5p	AT1G27360.1	K	k:778	conserved	Land plants	conserved	Green plants
ath-miR156a-5p	AT1G27360.2	K	k:978	conserved	Land plants	conserved	Green plants
ath-miR156a-5p	AT1G27360.3	K	k:780	conserved	Land plants	conserved	Green plants
ath-miR156a-5p	AT1G27360.4	K	k:738	conserved	Land plants	conserved	Green plants
ath-miR156a-5p	AT1G27370.1	K	k:1135	conserved	Land plants	conserved	Green plants
ath-miR156a-5p	AT1G27370.2	K	k:1110	conserved	Land plants	conserved	Green plants	1	1481-1500~6
ath-miR156a-5p	AT1G27370.3	K	k:654	conserved	Land plants	conserved	Green plants	1	2416-2435~7
ath-miR156a-5p	AT1G27370.4	K	k:1135	conserved	Land plants	conserved	Green plants
ath-miR156a-5p	AT1G27370.5	K	k:648	conserved	Land plants	conserved	Green plants
ath-miR156a-5p	AT1G27370.6	K	k:634	conserved	Land plants	conserved	Green plants
ath-miR156a-5p	AT1G27370.7	K	k:1121	conserved	Land plants	conserved	Green plants	1	1261-1280~7
ath-miR156a-5p	AT1G53160.1	K	k:1117	conserved	Land plants	conserved	Green plants
ath-miR156a-5p	AT1G68960.2	G	g:2	conserved	Land plants	conserved	Rosids
ath-miR156a-5p	AT1G69170.1	K	k:991	conserved	Land plants	conserved	Green plants
ath-miR156a-5p	AT2G07718.1	K	k:1135	conserved	Land plants	conserved	Eudicots
ath-miR156a-5p	AT2G17640.1	K	k:876	conserved	Land plants	conserved	Green plants
ath-miR156a-5p	AT2G21840.1	K	k:518	conserved	Land plants	conserved	Rosids
ath-miR156a-5p	AT2G21850.1	G	g:2	conserved	Land plants	conserved	Rosids
ath-miR156a-5p	AT2G33810.1	K	k:1131	conserved	Land plants	conserved	Green plants	1	787-806~8
ath-miR156a-5p	AT2G37860.1	K	k:1135	conserved	Land plants	conserved	Green plants
ath-miR156a-5p	AT2G42200.1	K	k:1110	conserved	Land plants	conserved	Green plants
ath-miR156a-5p	AT3G02210.1	G	g:21	conserved	Land plants	conserved	Green plants
ath-miR156a-5p	AT3G06250.2	K	k:1062	conserved	Land plants	conserved	Flowering plants
ath-miR156a-5p	AT3G06250.3	K	k:1062	conserved	Land plants	conserved	Flowering plants
ath-miR156a-5p	AT3G15270.1	K	k:914	conserved	Land plants	conserved	Green plants
ath-miR156a-5p	AT3G28690.1	K	k:985	conserved	Land plants	conserved	Land plants
ath-miR156a-5p	AT3G51910.1	K	k:611	conserved	Land plants	conserved	Green plants	1	1019-1038~4
ath-miR156a-5p	AT3G57920.1	K	k:1132	conserved	Land plants	conserved	Green plants	1	845-864~4
ath-miR156a-5p	AT3G62420.1	KL	k:422,l:106	conserved	Land plants	conserved	Green plants
ath-miR156a-5p	AT4G35170.1	K	k:1082	conserved	Land plants	conserved	Land plants
ath-miR156a-5p	AT5G03140.1	K	k:903	conserved	Land plants	conserved	Land plants
ath-miR156a-5p	AT5G42040.1	G	g:22	conserved	Land plants	conserved	Green plants
ath-miR156a-5p	AT5G43270.1	K	k:284	conserved	Land plants	conserved	Green plants	1	1891-1910~7
ath-miR156a-5p	AT5G43270.2	K	k:479	conserved	Land plants	conserved	Green plants	1	1236-1255~9
ath-miR156a-5p	AT5G43270.3	K	k:374	conserved	Land plants	conserved	Green plants	1	1787-1806~7
ath-miR156a-5p	AT5G50570.1	K	k:1135	conserved	Land plants	conserved	Green plants
ath-miR156a-5p	AT5G50570.2	K	k:1135	conserved	Land plants	conserved	Green plants
ath-miR156a-5p	AT5G50670.1	K	k:1135	conserved	Land plants	conserved	Green plants
ath-miR156a-5p	AT5G50670.2	K	k:1135	conserved	Land plants	conserved	Green plants
ath-miR156b-5p	AT1G25500.2	K	k:1125	conserved	Land plants	conserved	Green plants
ath-miR156b-5p	AT1G25500.3	K	k:1131	conserved	Land plants	conserved	Green plants
ath-miR156b-5p	AT1G27360.1	K	k:778	conserved	Land plants	conserved	Green plants
ath-miR156b-5p	AT1G27360.2	K	k:978	conserved	Land plants	conserved	Green plants
ath-miR156b-5p	AT1G27360.3	K	k:780	conserved	Land plants	conserved	Green plants
ath-miR156b-5p	AT1G27360.4	K	k:738	conserved	Land plants	conserved	Green plants
ath-miR156b-5p	AT1G27370.1	K	k:1135	conserved	Land plants	conserved	Green plants
ath-miR156b-5p	AT1G27370.2	K	k:1110	conserved	Land plants	conserved	Green plants
ath-miR156b-5p	AT1G27370.3	K	k:654	conserved	Land plants	conserved	Green plants
ath-miR156b-5p	AT1G27370.4	K	k:1135	conserved	Land plants	conserved	Green plants
ath-miR156b-5p	AT1G27370.5	K	k:648	conserved	Land plants	conserved	Green plants
ath-miR156b-5p	AT1G27370.6	K	k:634	conserved	Land plants	conserved	Green plants
ath-miR156b-5p	AT1G27370.7	K	k:1121	conserved	Land plants	conserved	Green plants
ath-miR156b-5p	AT1G53160.1	K	k:1117	conserved	Land plants	conserved	Green plants
ath-miR156b-5p	AT1G68960.2	G	g:2	conserved	Land plants	conserved	Rosids
ath-miR156b-5p	AT1G69170.1	K	k:991	conserved	Land plants	conserved	Green plants
ath-miR156b-5p	AT2G07718.1	K	k:1135	conserved	Land plants	conserved	Eudicots
ath-miR156b-5p	AT2G17640.1	K	k:876	conserved	Land plants	conserved	Green plants
ath-miR156b-5p	AT2G21840.1	K	k:518	conserved	Land plants	conserved	Rosids
ath-miR156b-5p	AT2G21850.1	G	g:2	conserved	Land plants	conserved	Rosids
ath-miR156b-5p	AT2G33810.1	K	k:1131	conserved	Land plants	conserved	Green plants
ath-miR156b-5p	AT2G37860.1	K	k:1135	conserved	Land plants	conserved	Green plants
ath-miR156b-5p	AT2G42200.1	K	k:1110	conserved	Land plants	conserved	Green plants
ath-miR156b-5p	AT3G02210.1	G	g:21	conserved	Land plants	conserved	Green plants
ath-miR156b-5p	AT3G06250.2	K	k:1062	conserved	Land plants	conserved	Flowering plants
ath-miR156b-5p	AT3G06250.3	K	k:1062	conserved	Land plants	conserved	Flowering plants
ath-miR156b-5p	AT3G15270.1	K	k:914	conserved	Land plants	conserved	Green plants
ath-miR156b-5p	AT3G28690.1	K	k:985	conserved	Land plants	conserved	Land plants
ath-miR156b-5p	AT3G51910.1	K	k:611	conserved	Land plants	conserved	Green plants
ath-miR156b-5p	AT3G57920.1	K	k:1132	conserved	Land plants	conserved	Green plants
ath-miR156b-5p	AT3G62420.1	KL	k:422,l:106	conserved	Land plants	conserved	Green plants
ath-miR156b-5p	AT4G35170.1	K	k:1082	conserved	Land plants	conserved	Land plants
ath-miR156b-5p	AT5G03140.1	K	k:903	conserved	Land plants	conserved	Land plants
ath-miR156b-5p	AT5G42040.1	G	g:22	conserved	Land plants	conserved	Green plants
ath-miR156b-5p	AT5G43270.1	K	k:284	conserved	Land plants	conserved	Green plants
ath-miR156b-5p	AT5G43270.2	K	k:479	conserved	Land plants	conserved	Green plants
ath-miR156b-5p	AT5G43270.3	K	k:374	conserved	Land plants	conserved	Green plants
ath-miR156b-5p	AT5G50570.1	K	k:1135	conserved	Land plants	conserved	Green plants
ath-miR156b-5p	AT5G50570.2	K	k:1135	conserved	Land plants	conserved	Green plants
ath-miR156b-5p	AT5G50670.1	K	k:1135	conserved	Land plants	conserved	Green plants
ath-miR156b-5p	AT5G50670.2	K	k:1135	conserved	Land plants	conserved	Green plants
ath-miR156c-5p	AT1G25500.2	K	k:1125	conserved	Land plants	conserved	Green plants
ath-miR156c-5p	AT1G25500.3	K	k:1131	conserved	Land plants	conserved	Green plants
ath-miR156c-5p	AT1G27360.1	K	k:778	conserved	Land plants	conserved	Green plants
ath-miR156c-5p	AT1G27360.2	K	k:978	conserved	Land plants	conserved	Green plants
ath-miR156c-5p	AT1G27360.3	K	k:780	conserved	Land plants	conserved	Green plants
ath-miR156c-5p	AT1G27360.4	K	k:738	conserved	Land plants	conserved	Green plants
ath-miR156c-5p	AT1G27370.1	K	k:1135	conserved	Land plants	conserved	Green plants
ath-miR156c-5p	AT1G27370.2	K	k:1110	conserved	Land plants	conserved	Green plants
ath-miR156c-5p	AT1G27370.3	K	k:654	conserved	Land plants	conserved	Green plants
ath-miR156c-5p	AT1G27370.4	K	k:1135	conserved	Land plants	conserved	Green plants
ath-miR156c-5p	AT1G27370.5	K	k:648	conserved	Land plants	conserved	Green plants
ath-miR156c-5p	AT1G27370.6	K	k:634	conserved	Land plants	conserved	Green plants
ath-miR156c-5p	AT1G27370.7	K	k:1121	conserved	Land plants	conserved	Green plants
ath-miR156c-5p	AT1G53160.1	K	k:1117	conserved	Land plants	conserved	Green plants
ath-miR156c-5p	AT1G68960.2	G	g:2	conserved	Land plants	conserved	Rosids
ath-miR156c-5p	AT1G69170.1	K	k:991	conserved	Land plants	conserved	Green plants
ath-miR156c-5p	AT2G07718.1	K	k:1135	conserved	Land plants	conserved	Eudicots
ath-miR156c-5p	AT2G17640.1	K	k:876	conserved	Land plants	conserved	Green plants
ath-miR156c-5p	AT2G21840.1	K	k:518	conserved	Land plants	conserved	Rosids
ath-miR156c-5p	AT2G21850.1	G	g:2	conserved	Land plants	conserved	Rosids
ath-miR156c-5p	AT2G33810.1	K	k:1131	conserved	Land plants	conserved	Green plants
ath-miR156c-5p	AT2G37860.1	K	k:1135	conserved	Land plants	conserved	Green plants
ath-miR156c-5p	AT2G42200.1	K	k:1110	conserved	Land plants	conserved	Green plants
ath-miR156c-5p	AT3G02210.1	G	g:21	conserved	Land plants	conserved	Green plants
ath-miR156c-5p	AT3G06250.2	K	k:1062	conserved	Land plants	conserved	Flowering plants
ath-miR156c-5p	AT3G06250.3	K	k:1062	conserved	Land plants	conserved	Flowering plants
ath-miR156c-5p	AT3G15270.1	K	k:914	conserved	Land plants	conserved	Green plants
ath-miR156c-5p	AT3G28690.1	K	k:985	conserved	Land plants	conserved	Land plants
ath-miR156c-5p	AT3G51910.1	K	k:611	conserved	Land plants	conserved	Green plants
ath-miR156c-5p	AT3G57920.1	K	k:1132	conserved	Land plants	conserved	Green plants
ath-miR156c-5p	AT3G62420.1	KL	k:422,l:106	conserved	Land plants	conserved	Green plants
ath-miR156c-5p	AT4G35170.1	K	k:1082	conserved	Land plants	conserved	Land plants
ath-miR156c-5p	AT5G03140.1	K	k:903	conserved	Land plants	conserved	Land plants
ath-miR156c-5p	AT5G42040.1	G	g:22	conserved	Land plants	conserved	Green plants
ath-miR156c-5p	AT5G43270.1	K	k:284	conserved	Land plants	conserved	Green plants
ath-miR156c-5p	AT5G43270.2	K	k:479	conserved	Land plants	conserved	Green plants
ath-miR156c-5p	AT5G43270.3	K	k:374	conserved	Land plants	conserved	Green plants
ath-miR156c-5p	AT5G50570.1	K	k:1135	conserved	Land plants	conserved	Green plants
ath-miR156c-5p	AT5G50570.2	K	k:1135	conserved	Land plants	conserved	Green plants
ath-miR156c-5p	AT5G50670.1	K	k:1135	conserved	Land plants	conserved	Green plants
ath-miR156c-5p	AT5G50670.2	K	k:1135	conserved	Land plants	conserved	Green plants
ath-miR156d-3p	AT1G70300.1	KL	k:662,l:2	conserved	Brassicaceae	conserved	Green plants
ath-miR156d-3p	AT1G72820.1	G	g:32	conserved	Brassicaceae	conserved	Green plants
ath-miR156d-5p	AT1G25500.2	KL	k:1020,l:105	conserved	Land plants	conserved	Green plants
ath-miR156d-5p	AT1G25500.3	KL	k:1026,l:105	conserved	Land plants	conserved	Green plants
ath-miR156d-5p	AT1G27360.1	K	k:778	conserved	Land plants	conserved	Green plants
ath-miR156d-5p	AT1G27360.2	K	k:978	conserved	Land plants	conserved	Green plants
ath-miR156d-5p	AT1G27360.3	K	k:780	conserved	Land plants	conserved	Green plants
ath-miR156d-5p	AT1G27360.4	K	k:738	conserved	Land plants	conserved	Green plants
ath-miR156d-5p	AT1G27370.1	K	k:1135	conserved	Land plants	conserved	Green plants
ath-miR156d-5p	AT1G27370.2	K	k:1110	conserved	Land plants	conserved	Green plants
ath-miR156d-5p	AT1G27370.3	K	k:654	conserved	Land plants	conserved	Green plants
ath-miR156d-5p	AT1G27370.4	K	k:1135	conserved	Land plants	conserved	Green plants
ath-miR156d-5p	AT1G27370.5	K	k:648	conserved	Land plants	conserved	Green plants
ath-miR156d-5p	AT1G27370.6	K	k:634	conserved	Land plants	conserved	Green plants
ath-miR156d-5p	AT1G27370.7	K	k:1121	conserved	Land plants	conserved	Green plants
ath-miR156d-5p	AT1G53160.1	K	k:1117	conserved	Land plants	conserved	Green plants
ath-miR156d-5p	AT1G68490.1	G	g:3	conserved	Land plants	conserved	Land plants
ath-miR156d-5p	AT1G68960.2	G	g:104	conserved	Land plants	conserved	Rosids
ath-miR156d-5p	AT1G69170.1	K	k:991	conserved	Land plants	conserved	Green plants
ath-miR156d-5p	AT2G07718.1	K	k:1135	conserved	Land plants	conserved	Eudicots
ath-miR156d-5p	AT2G17640.1	K	k:876	conserved	Land plants	conserved	Green plants
ath-miR156d-5p	AT2G21840.1	KL	k:483,l:35	conserved	Land plants	conserved	Rosids
ath-miR156d-5p	AT2G21850.1	G	g:2	conserved	Land plants	conserved	Rosids
ath-miR156d-5p	AT2G33810.1	K	k:1131	conserved	Land plants	conserved	Green plants
ath-miR156d-5p	AT2G37860.1	KL	k:1030,l:105	conserved	Land plants	conserved	Green plants
ath-miR156d-5p	AT2G42200.1	K	k:1110	conserved	Land plants	conserved	Green plants
ath-miR156d-5p	AT2G43700.1	G	g:60	conserved	Land plants	conserved	Land plants
ath-miR156d-5p	AT3G02210.1	G	g:21	conserved	Land plants	conserved	Green plants
ath-miR156d-5p	AT3G06250.2	KL	k:957,l:105	conserved	Land plants	conserved	Flowering plants
ath-miR156d-5p	AT3G06250.3	KL	k:957,l:105	conserved	Land plants	conserved	Flowering plants
ath-miR156d-5p	AT3G15270.1	K	k:914	conserved	Land plants	conserved	Green plants
ath-miR156d-5p	AT3G20140.1	G	g:105	conserved	Land plants	conserved	Land plants
ath-miR156d-5p	AT3G28690.1	K	k:985	conserved	Land plants	conserved	Land plants
ath-miR156d-5p	AT3G51910.1	KL	k:578,l:33	conserved	Land plants	conserved	Green plants
ath-miR156d-5p	AT3G57920.1	K	k:1132	conserved	Land plants	conserved	Green plants
ath-miR156d-5p	AT3G62420.1	KL	k:422,l:106	conserved	Land plants	conserved	Green plants
ath-miR156d-5p	AT4G35170.1	KL	k:985,l:97	conserved	Land plants	conserved	Land plants
ath-miR156d-5p	AT5G03140.1	KL	k:819,l:84	conserved	Land plants	conserved	Land plants
ath-miR156d-5p	AT5G42040.1	G	g:22	conserved	Land plants	conserved	Green plants
ath-miR156d-5p	AT5G43270.1	K	k:284	conserved	Land plants	conserved	Green plants
ath-miR156d-5p	AT5G43270.2	K	k:479	conserved	Land plants	conserved	Green plants
ath-miR156d-5p	AT5G43270.3	K	k:374	conserved	Land plants	conserved	Green plants
ath-miR156d-5p	AT5G50570.1	K	k:1135	conserved	Land plants	conserved	Green plants
ath-miR156d-5p	AT5G50570.2	K	k:1135	conserved	Land plants	conserved	Green plants
ath-miR156d-5p	AT5G50670.1	K	k:1135	conserved	Land plants	conserved	Green plants
ath-miR156d-5p	AT5G50670.2	K	k:1135	conserved	Land plants	conserved	Green plants
ath-miR156e	AT1G25500.2	K	k:1125	conserved	Land plants	conserved	Green plants
ath-miR156e	AT1G25500.3	K	k:1131	conserved	Land plants	conserved	Green plants
ath-miR156e	AT1G27360.1	K	k:778	conserved	Land plants	conserved	Green plants
ath-miR156e	AT1G27360.2	K	k:978	conserved	Land plants	conserved	Green plants
ath-miR156e	AT1G27360.3	K	k:780	conserved	Land plants	conserved	Green plants
ath-miR156e	AT1G27360.4	K	k:738	conserved	Land plants	conserved	Green plants
ath-miR156e	AT1G27370.1	K	k:1135	conserved	Land plants	conserved	Green plants
ath-miR156e	AT1G27370.2	K	k:1110	conserved	Land plants	conserved	Green plants
ath-miR156e	AT1G27370.3	K	k:654	conserved	Land plants	conserved	Green plants
ath-miR156e	AT1G27370.4	K	k:1135	conserved	Land plants	conserved	Green plants
ath-miR156e	AT1G27370.5	K	k:648	conserved	Land plants	conserved	Green plants
ath-miR156e	AT1G27370.6	K	k:634	conserved	Land plants	conserved	Green plants
ath-miR156e	AT1G27370.7	K	k:1121	conserved	Land plants	conserved	Green plants
ath-miR156e	AT1G53160.1	K	k:1117	conserved	Land plants	conserved	Green plants
ath-miR156e	AT1G68960.2	G	g:2	conserved	Land plants	conserved	Rosids
ath-miR156e	AT1G69170.1	K	k:991	conserved	Land plants	conserved	Green plants
ath-miR156e	AT2G07718.1	K	k:1135	conserved	Land plants	conserved	Eudicots
ath-miR156e	AT2G17640.1	K	k:876	conserved	Land plants	conserved	Green plants
ath-miR156e	AT2G21840.1	K	k:518	conserved	Land plants	conserved	Rosids
ath-miR156e	AT2G21850.1	G	g:2	conserved	Land plants	conserved	Rosids
ath-miR156e	AT2G33810.1	K	k:1131	conserved	Land plants	conserved	Green plants
ath-miR156e	AT2G37860.1	K	k:1135	conserved	Land plants	conserved	Green plants
ath-miR156e	AT2G42200.1	K	k:1110	conserved	Land plants	conserved	Green plants
ath-miR156e	AT3G02210.1	G	g:21	conserved	Land plants	conserved	Green plants
ath-miR156e	AT3G06250.2	K	k:1062	conserved	Land plants	conserved	Flowering plants
ath-miR156e	AT3G06250.3	K	k:1062	conserved	Land plants	conserved	Flowering plants
ath-miR156e	AT3G15270.1	K	k:914	conserved	Land plants	conserved	Green plants
ath-miR156e	AT3G28690.1	K	k:985	conserved	Land plants	conserved	Land plants
ath-miR156e	AT3G51910.1	K	k:611	conserved	Land plants	conserved	Green plants
ath-miR156e	AT3G57920.1	K	k:1132	conserved	Land plants	conserved	Green plants
ath-miR156e	AT3G62420.1	KL	k:422,l:106	conserved	Land plants	conserved	Green plants
ath-miR156e	AT4G35170.1	K	k:1082	conserved	Land plants	conserved	Land plants
ath-miR156e	AT5G03140.1	K	k:903	conserved	Land plants	conserved	Land plants
ath-miR156e	AT5G42040.1	G	g:22	conserved	Land plants	conserved	Green plants
ath-miR156e	AT5G43270.1	K	k:284	conserved	Land plants	conserved	Green plants
ath-miR156e	AT5G43270.2	K	k:479	conserved	Land plants	conserved	Green plants
ath-miR156e	AT5G43270.3	K	k:374	conserved	Land plants	conserved	Green plants
ath-miR156e	AT5G50570.1	K	k:1135	conserved	Land plants	conserved	Green plants
ath-miR156e	AT5G50570.2	K	k:1135	conserved	Land plants	conserved	Green plants
ath-miR156e	AT5G50670.1	K	k:1135	conserved	Land plants	conserved	Green plants
ath-miR156e	AT5G50670.2	K	k:1135	conserved	Land plants	conserved	Green plants
ath-miR156f-3p	AT1G72820.1	G	g:32	conserved	Flowering plants	conserved	Green plants
ath-miR156f-5p	AT1G25500.2	K	k:1125	conserved	Land plants	conserved	Green plants
ath-miR156f-5p	AT1G25500.3	K	k:1131	conserved	Land plants	conserved	Green plants
ath-miR156f-5p	AT1G27360.1	K	k:778	conserved	Land plants	conserved	Green plants
ath-miR156f-5p	AT1G27360.2	K	k:978	conserved	Land plants	conserved	Green plants
ath-miR156f-5p	AT1G27360.3	K	k:780	conserved	Land plants	conserved	Green plants
ath-miR156f-5p	AT1G27360.4	K	k:738	conserved	Land plants	conserved	Green plants
ath-miR156f-5p	AT1G27370.1	K	k:1135	conserved	Land plants	conserved	Green plants
ath-miR156f-5p	AT1G27370.2	K	k:1110	conserved	Land plants	conserved	Green plants
ath-miR156f-5p	AT1G27370.3	K	k:654	conserved	Land plants	conserved	Green plants	1	2416-2435~5
ath-miR156f-5p	AT1G27370.4	K	k:1135	conserved	Land plants	conserved	Green plants
ath-miR156f-5p	AT1G27370.5	K	k:648	conserved	Land plants	conserved	Green plants
ath-miR156f-5p	AT1G27370.6	K	k:634	conserved	Land plants	conserved	Green plants
ath-miR156f-5p	AT1G27370.7	K	k:1121	conserved	Land plants	conserved	Green plants	1	1261-1280~5
ath-miR156f-5p	AT1G53160.1	K	k:1117	conserved	Land plants	conserved	Green plants
ath-miR156f-5p	AT1G68960.2	G	g:2	conserved	Land plants	conserved	Rosids
ath-miR156f-5p	AT1G69170.1	K	k:991	conserved	Land plants	conserved	Green plants
ath-miR156f-5p	AT2G07718.1	K	k:1135	conserved	Land plants	conserved	Eudicots
ath-miR156f-5p	AT2G17640.1	K	k:876	conserved	Land plants	conserved	Green plants
ath-miR156f-5p	AT2G21840.1	K	k:518	conserved	Land plants	conserved	Rosids
ath-miR156f-5p	AT2G21850.1	G	g:2	conserved	Land plants	conserved	Rosids
ath-miR156f-5p	AT2G33810.1	K	k:1131	conserved	Land plants	conserved	Green plants
ath-miR156f-5p	AT2G37860.1	K	k:1135	conserved	Land plants	conserved	Green plants
ath-miR156f-5p	AT2G42200.1	K	k:1110	conserved	Land plants	conserved	Green plants
ath-miR156f-5p	AT3G02210.1	G	g:21	conserved	Land plants	conserved	Green plants
ath-miR156f-5p	AT3G06250.2	K	k:1062	conserved	Land plants	conserved	Flowering plants
ath-miR156f-5p	AT3G06250.3	K	k:1062	conserved	Land plants	conserved	Flowering plants
ath-miR156f-5p	AT3G15270.1	K	k:914	conserved	Land plants	conserved	Green plants
ath-miR156f-5p	AT3G28690.1	K	k:985	conserved	Land plants	conserved	Land plants
ath-miR156f-5p	AT3G51910.1	K	k:611	conserved	Land plants	conserved	Green plants	1	1019-1038~3
ath-miR156f-5p	AT3G57920.1	K	k:1132	conserved	Land plants	conserved	Green plants	1	845-864~6
ath-miR156f-5p	AT3G62420.1	KL	k:422,l:106	conserved	Land plants	conserved	Green plants
ath-miR156f-5p	AT4G35170.1	K	k:1082	conserved	Land plants	conserved	Land plants
ath-miR156f-5p	AT5G03140.1	K	k:903	conserved	Land plants	conserved	Land plants
ath-miR156f-5p	AT5G42040.1	G	g:22	conserved	Land plants	conserved	Green plants
ath-miR156f-5p	AT5G43270.1	K	k:284	conserved	Land plants	conserved	Green plants
ath-miR156f-5p	AT5G43270.2	K	k:479	conserved	Land plants	conserved	Green plants
ath-miR156f-5p	AT5G43270.3	K	k:374	conserved	Land plants	conserved	Green plants
ath-miR156f-5p	AT5G50570.1	K	k:1135	conserved	Land plants	conserved	Green plants
ath-miR156f-5p	AT5G50570.2	K	k:1135	conserved	Land plants	conserved	Green plants
ath-miR156f-5p	AT5G50670.1	K	k:1135	conserved	Land plants	conserved	Green plants
ath-miR156f-5p	AT5G50670.2	K	k:1135	conserved	Land plants	conserved	Green plants
ath-miR156g	AT1G27360.1	K	k:778	conserved	Land plants	conserved	Green plants
ath-miR156g	AT1G27360.2	K	k:978	conserved	Land plants	conserved	Green plants
ath-miR156g	AT1G27360.3	K	k:780	conserved	Land plants	conserved	Green plants
ath-miR156g	AT1G27360.4	K	k:738	conserved	Land plants	conserved	Green plants
ath-miR156g	AT1G27370.1	K	k:1135	conserved	Land plants	conserved	Green plants
ath-miR156g	AT1G27370.2	K	k:1110	conserved	Land plants	conserved	Green plants
ath-miR156g	AT1G27370.3	K	k:654	conserved	Land plants	conserved	Green plants
ath-miR156g	AT1G27370.4	K	k:1135	conserved	Land plants	conserved	Green plants
ath-miR156g	AT1G27370.5	K	k:648	conserved	Land plants	conserved	Green plants	1	2372-2391~8
ath-miR156g	AT1G27370.6	K	k:634	conserved	Land plants	conserved	Green plants
ath-miR156g	AT1G27370.7	K	k:1121	conserved	Land plants	conserved	Green plants
ath-miR156g	AT1G53160.1	K	k:1117	conserved	Land plants	conserved	Green plants
ath-miR156g	AT1G68960.2	G	g:2	conserved	Land plants	conserved	Rosids
ath-miR156g	AT1G69170.1	K	k:991	conserved	Land plants	conserved	Green plants
ath-miR156g	AT1G79520.3	K	k:467	conserved	Land plants	conserved	Green plants
ath-miR156g	AT1G79520.4	K	k:522	conserved	Land plants	conserved	Green plants
ath-miR156g	AT2G17640.1	K	k:876	conserved	Land plants	conserved	Green plants
ath-miR156g	AT2G21840.1	K	k:518	conserved	Land plants	conserved	Rosids
ath-miR156g	AT2G33810.1	K	k:1131	conserved	Land plants	conserved	Green plants	1	787-806~5
ath-miR156g	AT2G42200.1	K	k:1110	conserved	Land plants	conserved	Green plants
ath-miR156g	AT2G43700.1	KL	k:655,l:1	conserved	Land plants	conserved	Land plants
ath-miR156g	AT3G02210.1	G	g:21	conserved	Land plants	conserved	Green plants
ath-miR156g	AT3G15270.1	K	k:914	conserved	Land plants	conserved	Green plants
ath-miR156g	AT3G28690.1	K	k:985	conserved	Land plants	conserved	Land plants
ath-miR156g	AT3G57920.1	K	k:1132	conserved	Land plants	conserved	Green plants
ath-miR156g	AT4G35170.1	K	k:1082	conserved	Land plants	conserved	Land plants
ath-miR156g	AT5G03140.1	K	k:903	conserved	Land plants	conserved	Land plants
ath-miR156g	AT5G42040.1	G	g:22	conserved	Land plants	conserved	Green plants
ath-miR156g	AT5G43270.1	K	k:284	conserved	Land plants	conserved	Green plants
ath-miR156g	AT5G43270.2	K	k:479	conserved	Land plants	conserved	Green plants
ath-miR156g	AT5G43270.3	K	k:374	conserved	Land plants	conserved	Green plants
ath-miR156g	AT5G50570.1	K	k:1135	conserved	Land plants	conserved	Green plants
ath-miR156g	AT5G50570.2	K	k:1135	conserved	Land plants	conserved	Green plants
ath-miR156g	AT5G50670.1	K	k:1135	conserved	Land plants	conserved	Green plants	1	1264-1283~11
ath-miR156g	AT5G50670.2	K	k:1135	conserved	Land plants	conserved	Green plants	1	1283-1302~12
ath-miR156h	AT1G01920.3	KL	k:1036,l:2	conserved	Vascular plants	conserved	Green plants
ath-miR156h	AT1G09170.1	K	k:608	conserved	Vascular plants	conserved	Green plants
ath-miR156h	AT1G09170.2	K	k:561	conserved	Vascular plants	conserved	Green plants
ath-miR156h	AT1G09170.3	K	k:1059	conserved	Vascular plants	conserved	Green plants
ath-miR156h	AT1G09170.4	K	k:1135	conserved	Vascular plants	conserved	Green plants
ath-miR156h	AT1G09170.5	K	k:575	conserved	Vascular plants	conserved	Green plants
ath-miR156h	AT1G09170.6	K	k:1022	conserved	Vascular plants	conserved	Green plants
ath-miR156h	AT1G09170.7	K	k:1041	conserved	Vascular plants	conserved	Green plants
ath-miR156h	AT1G09170.8	K	k:748	conserved	Vascular plants	conserved	Green plants
ath-miR156h	AT1G13560.1	K	k:732	conserved	Vascular plants	conserved	Green plants
ath-miR156h	AT1G13560.2	K	k:836	conserved	Vascular plants	conserved	Green plants
ath-miR156h	AT1G15100.1	KL	k:1025,l:22	conserved	Vascular plants	conserved	Green plants	1	623-642~2
ath-miR156h	AT1G22000.1	K	k:977	conserved	Vascular plants	conserved	Flowering plants
ath-miR156h	AT1G26890.1	K	k:934	conserved	Vascular plants	conserved	Flowering plants
ath-miR156h	AT1G26890.2	K	k:931	conserved	Vascular plants	conserved	Flowering plants
ath-miR156h	AT1G26890.3	K	k:931	conserved	Vascular plants	conserved	Flowering plants
ath-miR156h	AT1G26890.4	K	k:931	conserved	Vascular plants	conserved	Flowering plants
ath-miR156h	AT1G26890.5	K	k:931	conserved	Vascular plants	conserved	Flowering plants
ath-miR156h	AT1G27360.1	K	k:778	conserved	Vascular plants	conserved	Green plants
ath-miR156h	AT1G27360.2	K	k:978	conserved	Vascular plants	conserved	Green plants
ath-miR156h	AT1G27360.3	K	k:780	conserved	Vascular plants	conserved	Green plants
ath-miR156h	AT1G27360.4	K	k:738	conserved	Vascular plants	conserved	Green plants
ath-miR156h	AT1G27370.1	K	k:1135	conserved	Vascular plants	conserved	Green plants
ath-miR156h	AT1G27370.2	K	k:1110	conserved	Vascular plants	conserved	Green plants	1	1481-1500~6
ath-miR156h	AT1G27370.3	K	k:654	conserved	Vascular plants	conserved	Green plants
ath-miR156h	AT1G27370.4	K	k:1135	conserved	Vascular plants	conserved	Green plants
ath-miR156h	AT1G27370.5	K	k:648	conserved	Vascular plants	conserved	Green plants	1	2372-2391~4
ath-miR156h	AT1G27370.6	K	k:634	conserved	Vascular plants	conserved	Green plants
ath-miR156h	AT1G27370.7	K	k:1121	conserved	Vascular plants	conserved	Green plants
ath-miR156h	AT1G33700.2	KL	k:827,l:305	conserved	Vascular plants	conserved	Green plants
ath-miR156h	AT1G33700.4	KL	k:827,l:305	conserved	Vascular plants	conserved	Green plants
ath-miR156h	AT1G34630.1	KL	k:548,l:40	conserved	Vascular plants	conserved	Green plants
ath-miR156h	AT1G34630.2	KL	k:546,l:40	conserved	Vascular plants	conserved	Green plants
ath-miR156h	AT1G34630.4	KL	k:669,l:73	conserved	Vascular plants	conserved	Green plants
ath-miR156h	AT1G44050.1	G	g:5	conserved	Vascular plants	conserved	Eudicots
ath-miR156h	AT1G53160.1	K	k:1117	conserved	Vascular plants	conserved	Green plants
ath-miR156h	AT1G67040.1	K	k:613	conserved	Vascular plants	conserved	Land plants
ath-miR156h	AT1G67040.2	K	k:613	conserved	Vascular plants	conserved	Land plants
ath-miR156h	AT1G69170.1	K	k:991	conserved	Vascular plants	conserved	Green plants
ath-miR156h	AT2G03750.1	KL	k:666,l:13	conserved	Vascular plants	conserved	Green plants	1	1304-1323~1
ath-miR156h	AT2G14680.1	G	g:3	conserved	Vascular plants	conserved	Green plants
ath-miR156h	AT2G14680.2	G	g:3	conserved	Vascular plants	conserved	Green plants
ath-miR156h	AT2G14680.3	G	g:3	conserved	Vascular plants	conserved	Green plants
ath-miR156h	AT2G14680.4	G	g:3	conserved	Vascular plants	conserved	Green plants
ath-miR156h	AT2G14680.5	G	g:3	conserved	Vascular plants	conserved	Green plants
ath-miR156h	AT2G14680.6	G	g:3	conserved	Vascular plants	conserved	Green plants
ath-miR156h	AT2G14680.7	G	g:3	conserved	Vascular plants	conserved	Green plants
ath-miR156h	AT2G14680.8	G	g:3	conserved	Vascular plants	conserved	Green plants
ath-miR156h	AT2G28605.1	K	k:1101	conserved	Vascular plants	conserved	Green plants	1	873-892~2
ath-miR156h	AT2G34730.1	G	g:3	conserved	Vascular plants	conserved	Land plants
ath-miR156h	AT2G34730.2	G	g:3	conserved	Vascular plants	conserved	Land plants
ath-miR156h	AT2G42200.1	K	k:1110	conserved	Vascular plants	conserved	Green plants
ath-miR156h	AT2G43140.1	K	k:219	conserved	Vascular plants	conserved	Land plants
ath-miR156h	AT2G47590.1	K	k:1121	conserved	Vascular plants	conserved	Green plants	1	318-337~5
ath-miR156h	AT3G01410.1	K	k:1066	conserved	Vascular plants	conserved	Green plants
ath-miR156h	AT3G01410.2	K	k:1066	conserved	Vascular plants	conserved	Green plants
ath-miR156h	AT3G05590.1	G	g:4	conserved	Vascular plants	conserved	Green plants
ath-miR156h	AT3G05590.2	G	g:4	conserved	Vascular plants	conserved	Green plants
ath-miR156h	AT3G06250.2	K	k:1062	conserved	Vascular plants	conserved	Flowering plants
ath-miR156h	AT3G06250.3	K	k:1062	conserved	Vascular plants	conserved	Flowering plants
ath-miR156h	AT3G15270.1	K	k:914	conserved	Vascular plants	conserved	Green plants
ath-miR156h	AT3G17340.1	G	g:2	conserved	Vascular plants	conserved	Green plants
ath-miR156h	AT3G17340.2	G	g:2	conserved	Vascular plants	conserved	Green plants
ath-miR156h	AT3G17365.1	K	k:1088	conserved	Vascular plants	conserved	Green plants
ath-miR156h	AT3G17365.2	K	k:1088	conserved	Vascular plants	conserved	Green plants
ath-miR156h	AT3G28690.1	K	k:985	conserved	Vascular plants	conserved	Land plants
ath-miR156h	AT3G28860.1	K	k:547	conserved	Vascular plants	conserved	Green plants
ath-miR156h	AT3G47220.1	G	g:1	conserved	Vascular plants	conserved	Green plants
ath-miR156h	AT3G51910.1	K	k:611	conserved	Vascular plants	conserved	Green plants
ath-miR156h	AT3G57800.2	K	k:718	conserved	Vascular plants	conserved	Green plants
ath-miR156h	AT3G57920.1	K	k:1132	conserved	Vascular plants	conserved	Green plants
ath-miR156h	AT3G63088.1	K	k:739	conserved	Vascular plants	conserved	Eudicots
ath-miR156h	AT4G14510.1	G	g:1	conserved	Vascular plants	conserved	Green plants
ath-miR156h	AT4G20735.1	G	g:69	conserved	Vascular plants	non-conserved	Arabidopsis thaliana
ath-miR156h	AT4G35480.1	K	k:1096	conserved	Vascular plants	conserved	Green plants	1	135-153~1
ath-miR156h	AT5G19520.2	KL	k:701,l:2	conserved	Vascular plants	conserved	Green plants
ath-miR156h	AT5G42040.1	KL	k:878,l:1	conserved	Vascular plants	conserved	Green plants
ath-miR156h	AT5G43270.1	K	k:284	conserved	Vascular plants	conserved	Green plants	1	1891-1910~7
ath-miR156h	AT5G43270.2	K	k:479	conserved	Vascular plants	conserved	Green plants	1	1236-1255~6
ath-miR156h	AT5G43270.3	K	k:374	conserved	Vascular plants	conserved	Green plants	1	1787-1806~7
ath-miR156h	AT5G50570.1	K	k:1135	conserved	Vascular plants	conserved	Green plants
ath-miR156h	AT5G50570.2	K	k:1135	conserved	Vascular plants	conserved	Green plants
ath-miR156h	AT5G50670.1	K	k:1135	conserved	Vascular plants	conserved	Green plants
ath-miR156h	AT5G50670.2	K	k:1135	conserved	Vascular plants	conserved	Green plants
ath-miR156h	AT5G57910.1	G	g:9	conserved	Vascular plants	conserved	Flowering plants
ath-miR156h	AT5G57910.2	G	g:9	conserved	Vascular plants	conserved	Flowering plants
ath-miR156i	AT1G05640.1	KL	k:784,l:249	conserved	Land plants	conserved	Land plants
ath-miR156i	AT1G13560.1	KL	k:727,l:5	conserved	Land plants	conserved	Green plants
ath-miR156i	AT1G13560.2	KL	k:830,l:6	conserved	Land plants	conserved	Green plants
ath-miR156i	AT1G16750.1	K	k:687	conserved	Land plants	conserved	Land plants
ath-miR156i	AT1G16750.2	K	k:687	conserved	Land plants	conserved	Land plants
ath-miR156i	AT1G20710.1	K	k:673	conserved	Land plants	conserved	Green plants
ath-miR156i	AT1G27360.1	K	k:778	conserved	Land plants	conserved	Green plants	1	2330-2349~8
ath-miR156i	AT1G27360.2	K	k:978	conserved	Land plants	conserved	Green plants	1	1398-1417~7
ath-miR156i	AT1G27360.3	K	k:780	conserved	Land plants	conserved	Green plants	1	2061-2080~15
ath-miR156i	AT1G27360.4	K	k:738	conserved	Land plants	conserved	Green plants	1	2165-2184~7
ath-miR156i	AT1G27370.1	K	k:1135	conserved	Land plants	conserved	Green plants	1	1085-1104~6
ath-miR156i	AT1G27370.2	K	k:1110	conserved	Land plants	conserved	Green plants
ath-miR156i	AT1G27370.3	K	k:654	conserved	Land plants	conserved	Green plants
ath-miR156i	AT1G27370.4	K	k:1135	conserved	Land plants	conserved	Green plants	1	1193-1212~5
ath-miR156i	AT1G27370.5	K	k:648	conserved	Land plants	conserved	Green plants
ath-miR156i	AT1G27370.6	K	k:634	conserved	Land plants	conserved	Green plants	1	2739-2758~7
ath-miR156i	AT1G27370.7	K	k:1121	conserved	Land plants	conserved	Green plants
ath-miR156i	AT1G29890.1	K	k:1135	conserved	Land plants	conserved	Green plants
ath-miR156i	AT1G29890.2	K	k:1020	conserved	Land plants	conserved	Green plants
ath-miR156i	AT1G29890.3	K	k:1008	conserved	Land plants	conserved	Green plants
ath-miR156i	AT1G33350.2	K	k:925	conserved	Land plants	conserved	Flowering plants
ath-miR156i	AT1G34200.1	G	g:9	conserved	Land plants	conserved	Green plants
ath-miR156i	AT1G35516.2	K	k:716	conserved	Land plants	non-conserved	Arabidopsis thaliana
ath-miR156i	AT1G43690.1	G	g:7	conserved	Land plants	conserved	Green plants
ath-miR156i	AT1G47870.1	G	g:7	conserved	Land plants	conserved	Green plants
ath-miR156i	AT1G47870.2	G	g:7	conserved	Land plants	conserved	Green plants
ath-miR156i	AT1G49032.1	KL	k:783,l:3	conserved	Land plants	non-conserved	Arabidopsis thaliana	1	135-153~1
ath-miR156i	AT1G49032.2	KL	k:745,l:3	conserved	Land plants	non-conserved	Arabidopsis thaliana	1	36-54~1
ath-miR156i	AT1G50560.1	G	g:1	conserved	Land plants	conserved	Land plants
ath-miR156i	AT1G51160.1	KL	k:1087,l:26	conserved	Land plants	conserved	Green plants
ath-miR156i	AT1G51160.2	KL	k:1082,l:26	conserved	Land plants	conserved	Green plants
ath-miR156i	AT1G51160.3	KL	k:1027,l:26	conserved	Land plants	conserved	Green plants
ath-miR156i	AT1G51740.1	G	g:4	conserved	Land plants	conserved	Green plants
ath-miR156i	AT1G51740.2	G	g:4	conserved	Land plants	conserved	Green plants
ath-miR156i	AT1G52820.1	G	g:31	conserved	Land plants	conserved	Seed plants
ath-miR156i	AT1G52820.2	G	g:26	conserved	Land plants	conserved	Seed plants
ath-miR156i	AT1G53160.1	K	k:1117	conserved	Land plants	conserved	Green plants	1	750-769~11
ath-miR156i	AT1G56090.1	G	g:7	conserved	Land plants	conserved	Land plants
ath-miR156i	AT1G56090.2	G	g:4	conserved	Land plants	conserved	Land plants
ath-miR156i	AT1G56720.3	G	g:29	conserved	Land plants	conserved	Green plants
ath-miR156i	AT1G69170.1	K	k:991	conserved	Land plants	conserved	Green plants	1	1297-1316~8
ath-miR156i	AT1G69360.1	G	g:1	conserved	Land plants	conserved	Land plants
ath-miR156i	AT1G69440.1	G	g:3	conserved	Land plants	conserved	Green plants
ath-miR156i	AT1G71400.1	K	k:1054	conserved	Land plants	conserved	Green plants
ath-miR156i	AT1G72770.2	K	k:251	conserved	Land plants	conserved	Green plants
ath-miR156i	AT1G72770.3	K	k:619	conserved	Land plants	conserved	Green plants
ath-miR156i	AT1G72770.4	K	k:554	conserved	Land plants	conserved	Green plants
ath-miR156i	AT1G72770.5	K	k:398	conserved	Land plants	conserved	Green plants
ath-miR156i	AT1G80160.1	K	k:349	conserved	Land plants	conserved	Green plants
ath-miR156i	AT1G80160.2	K	k:368	conserved	Land plants	conserved	Green plants
ath-miR156i	AT1G80160.3	K	k:349	conserved	Land plants	conserved	Green plants
ath-miR156i	AT1G80840.1	K	k:1121	conserved	Land plants	conserved	Land plants
ath-miR156i	AT2G01480.1	G	g:38	conserved	Land plants	conserved	Green plants
ath-miR156i	AT2G01480.2	G	g:38	conserved	Land plants	conserved	Green plants
ath-miR156i	AT2G07690.1	G	g:59	conserved	Land plants	conserved	Green plants
ath-miR156i	AT2G14265.1	KL	k:296,l:44	conserved	Land plants	non-conserved	Arabidopsis thaliana
ath-miR156i	AT2G17220.1	K	k:945	conserved	Land plants	conserved	Land plants
ath-miR156i	AT2G17220.2	K	k:945	conserved	Land plants	conserved	Land plants
ath-miR156i	AT2G17640.1	K	k:872	conserved	Land plants	conserved	Green plants
ath-miR156i	AT2G17660.1	KL	k:1094,l:8	conserved	Land plants	conserved	Land plants
ath-miR156i	AT2G25270.1	G	g:6	conserved	Land plants	conserved	Green plants
ath-miR156i	AT2G27090.1	K	k:1099	conserved	Land plants	conserved	Flowering plants
ath-miR156i	AT2G28605.1	K	k:1094	conserved	Land plants	conserved	Green plants
ath-miR156i	AT2G28610.1	K	k:1110	conserved	Land plants	conserved	Vascular plants
ath-miR156i	AT2G33810.1	K	k:1131	conserved	Land plants	conserved	Green plants
ath-miR156i	AT2G42200.1	K	k:1110	conserved	Land plants	conserved	Green plants	1	1175-1194~4
ath-miR156i	AT2G42510.4	G	g:2	conserved	Land plants	conserved	Brassicaceae
ath-miR156i	AT2G44210.1	G	g:4	conserved	Land plants	conserved	Green plants
ath-miR156i	AT2G44210.2	G	g:3	conserved	Land plants	conserved	Green plants
ath-miR156i	AT2G45340.1	K	k:1080	conserved	Land plants	conserved	Land plants
ath-miR156i	AT2G47590.1	K	k:1121	conserved	Land plants	conserved	Green plants
ath-miR156i	AT3G02210.1	G	g:21	conserved	Land plants	conserved	Green plants
ath-miR156i	AT3G06330.2	K	k:1119	conserved	Land plants	conserved	Green plants
ath-miR156i	AT3G08680.1	G	g:8	conserved	Land plants	conserved	Land plants
ath-miR156i	AT3G08680.2	G	g:8	conserved	Land plants	conserved	Land plants
ath-miR156i	AT3G10910.1	G	g:4	conserved	Land plants	conserved	Green plants
ath-miR156i	AT3G15270.1	K	k:914	conserved	Land plants	conserved	Green plants	1	1620-1639~5
ath-miR156i	AT3G17340.1	G	g:2	conserved	Land plants	conserved	Green plants
ath-miR156i	AT3G17340.2	G	g:2	conserved	Land plants	conserved	Green plants
ath-miR156i	AT3G25890.1	G	g:5	conserved	Land plants	conserved	Seed plants
ath-miR156i	AT3G25890.2	G	g:6	conserved	Land plants	conserved	Seed plants
ath-miR156i	AT3G33528.1	K	k:1090	conserved	Land plants	conserved	Brassicaceae
ath-miR156i	AT3G33528.2	K	k:1089	conserved	Land plants	conserved	Brassicaceae
ath-miR156i	AT3G47170.1	KL	k:1048,l:9	conserved	Land plants	conserved	Seed plants
ath-miR156i	AT3G51540.1	KL	k:1125,l:6	conserved	Land plants	conserved	Rosids
ath-miR156i	AT3G51540.2	KL	k:1075,l:6	conserved	Land plants	conserved	Rosids
ath-miR156i	AT3G51540.3	KL	k:1114,l:6	conserved	Land plants	conserved	Rosids
ath-miR156i	AT3G51540.4	KL	k:1074,l:6	conserved	Land plants	conserved	Rosids
ath-miR156i	AT3G52060.1	G	g:7	conserved	Land plants	conserved	Land plants
ath-miR156i	AT3G55450.1	K	k:849	conserved	Land plants	conserved	Land plants
ath-miR156i	AT3G57890.1	K	k:958	conserved	Land plants	conserved	Green plants
ath-miR156i	AT3G57890.2	K	k:1128	conserved	Land plants	conserved	Green plants
ath-miR156i	AT3G57920.1	K	k:1132	conserved	Land plants	conserved	Green plants
ath-miR156i	AT3G61680.1	K	k:1062	conserved	Land plants	conserved	Green plants
ath-miR156i	AT3G62420.1	G	g:3	conserved	Land plants	conserved	Green plants
ath-miR156i	AT3G62570.1	K	k:1117	conserved	Land plants	conserved	Land plants
ath-miR156i	AT4G04890.2	K	k:745	conserved	Land plants	conserved	Land plants
ath-miR156i	AT4G07526.1	K	k:1058	conserved	Land plants	conserved	Brassicaceae
ath-miR156i	AT4G07526.2	K	k:1045	conserved	Land plants	conserved	Brassicaceae
ath-miR156i	AT4G07526.3	K	k:1044	conserved	Land plants	conserved	Brassicaceae
ath-miR156i	AT4G08500.1	K	k:974	conserved	Land plants	conserved	Green plants
ath-miR156i	AT4G13040.1	K	k:977	conserved	Land plants	conserved	Green plants
ath-miR156i	AT4G13040.5	K	k:970	conserved	Land plants	conserved	Green plants
ath-miR156i	AT4G13040.7	K	k:982	conserved	Land plants	conserved	Green plants
ath-miR156i	AT4G13040.8	K	k:834	conserved	Land plants	conserved	Green plants
ath-miR156i	AT4G14510.1	KL	k:1104,l:17	conserved	Land plants	conserved	Green plants
ath-miR156i	AT4G16563.1	G	g:7	conserved	Land plants	conserved	Seed plants
ath-miR156i	AT4G16790.1	KL	k:580,l:5	conserved	Land plants	conserved	Seed plants
ath-miR156i	AT4G22290.1	K	k:1024	conserved	Land plants	conserved	Flowering plants
ath-miR156i	AT4G22530.1	KL	k:1092,l:20	conserved	Land plants	conserved	Green plants
ath-miR156i	AT4G22530.2	KL	k:1068,l:24	conserved	Land plants	conserved	Green plants
ath-miR156i	AT4G24805.1	G	g:7	conserved	Land plants	conserved	Vascular plants
ath-miR156i	AT4G30560.1	G	g:7	conserved	Land plants	conserved	Green plants
ath-miR156i	AT4G30560.4	G	g:7	conserved	Land plants	conserved	Green plants
ath-miR156i	AT4G33350.1	G	g:6	conserved	Land plants	conserved	Green plants
ath-miR156i	AT4G33350.2	G	g:7	conserved	Land plants	conserved	Green plants
ath-miR156i	AT4G34730.1	G	g:7	conserved	Land plants	conserved	Green plants
ath-miR156i	AT4G34730.2	G	g:7	conserved	Land plants	conserved	Green plants
ath-miR156i	AT4G34730.3	G	g:7	conserved	Land plants	conserved	Green plants
ath-miR156i	AT4G35020.1	K	k:1071	conserved	Land plants	conserved	Green plants
ath-miR156i	AT4G35020.2	K	k:974	conserved	Land plants	conserved	Green plants
ath-miR156i	AT4G35020.3	K	k:1011	conserved	Land plants	conserved	Green plants
ath-miR156i	AT4G35020.5	K	k:1067	conserved	Land plants	conserved	Green plants
ath-miR156i	AT4G36710.1	G	g:4	conserved	Land plants	conserved	Flowering plants
ath-miR156i	AT5G05080.1	K	k:1018	conserved	Land plants	conserved	Green plants
ath-miR156i	AT5G05080.2	K	k:1018	conserved	Land plants	conserved	Green plants
ath-miR156i	AT5G05080.3	K	k:1020	conserved	Land plants	conserved	Green plants
ath-miR156i	AT5G05080.4	K	k:1018	conserved	Land plants	conserved	Green plants
ath-miR156i	AT5G10020.1	KL	k:822,l:7	conserved	Land plants	conserved	Land plants
ath-miR156i	AT5G10020.2	KL	k:1052,l:83	conserved	Land plants	conserved	Land plants
ath-miR156i	AT5G10140.1	G	g:4	conserved	Land plants	conserved	Eudicots
ath-miR156i	AT5G12900.1	KL	k:1003,l:2	conserved	Land plants	conserved	Land plants
ath-miR156i	AT5G16720.1	K	k:957	conserved	Land plants	conserved	Seed plants
ath-miR156i	AT5G26850.2	K	k:441	conserved	Land plants	conserved	Green plants
ath-miR156i	AT5G26850.4	K	k:426	conserved	Land plants	conserved	Green plants
ath-miR156i	AT5G27730.1	KL	k:455,l:7	conserved	Land plants	conserved	Land plants
ath-miR156i	AT5G27730.2	KL	k:424,l:7	conserved	Land plants	conserved	Land plants
ath-miR156i	AT5G36890.1	KL	k:537,l:2	conserved	Land plants	conserved	Green plants
ath-miR156i	AT5G36890.2	KL	k:1074,l:3	conserved	Land plants	conserved	Green plants
ath-miR156i	AT5G38250.1	G	g:13	conserved	Land plants	conserved	Vascular plants
ath-miR156i	AT5G41180.1	KL	k:951,l:4	conserved	Land plants	conserved	Seed plants
ath-miR156i	AT5G42510.1	G	g:2	conserved	Land plants	conserved	Land plants
ath-miR156i	AT5G42825.1	K	k:815	conserved	Land plants	conserved	Brassicaceae
ath-miR156i	AT5G43270.1	K	k:284	conserved	Land plants	conserved	Green plants
ath-miR156i	AT5G43270.2	K	k:479	conserved	Land plants	conserved	Green plants
ath-miR156i	AT5G43270.3	K	k:374	conserved	Land plants	conserved	Green plants
ath-miR156i	AT5G50570.1	K	k:1135	conserved	Land plants	conserved	Green plants
ath-miR156i	AT5G50570.2	K	k:1135	conserved	Land plants	conserved	Green plants
ath-miR156i	AT5G50670.1	K	k:1135	conserved	Land plants	conserved	Green plants
ath-miR156i	AT5G50670.2	K	k:1135	conserved	Land plants	conserved	Green plants
ath-miR156i	AT5G52830.1	G	g:8	conserved	Land plants	conserved	Land plants
ath-miR156i	AT5G54750.1	K	k:885	conserved	Land plants	conserved	Green plants
ath-miR156i	AT5G54750.2	K	k:1096	conserved	Land plants	conserved	Green plants
ath-miR156i	AT5G55100.11	G	g:2	conserved	Land plants	conserved	Green plants
ath-miR156i	AT5G55100.3	G	g:2	conserved	Land plants	conserved	Green plants
ath-miR156i	AT5G55100.5	G	g:2	conserved	Land plants	conserved	Green plants
ath-miR156i	AT5G55100.9	G	g:2	conserved	Land plants	conserved	Green plants
ath-miR156i	AT5G55370.1	G	g:7	conserved	Land plants	conserved	Green plants
ath-miR156i	AT5G57400.1	K	k:1112	conserved	Land plants	conserved	Flowering plants
ath-miR156i	AT5G57400.2	K	k:1121	conserved	Land plants	conserved	Flowering plants
ath-miR156i	AT5G66270.1	G	g:2	conserved	Land plants	conserved	Green plants
ath-miR156j	AT1G20710.1	K	k:673	conserved	Land plants	conserved	Green plants
ath-miR156j	AT1G22000.1	KL	k:976,l:1	conserved	Land plants	conserved	Flowering plants
ath-miR156j	AT1G26890.1	K	k:934	conserved	Land plants	conserved	Flowering plants
ath-miR156j	AT1G26890.2	K	k:931	conserved	Land plants	conserved	Flowering plants
ath-miR156j	AT1G26890.3	K	k:931	conserved	Land plants	conserved	Flowering plants
ath-miR156j	AT1G26890.4	K	k:931	conserved	Land plants	conserved	Flowering plants
ath-miR156j	AT1G26890.5	K	k:931	conserved	Land plants	conserved	Flowering plants
ath-miR156j	AT1G27360.1	K	k:778	conserved	Land plants	conserved	Green plants	1	2330-2349~6
ath-miR156j	AT1G27360.2	K	k:978	conserved	Land plants	conserved	Green plants	1	1398-1417~7
ath-miR156j	AT1G27360.3	K	k:780	conserved	Land plants	conserved	Green plants
ath-miR156j	AT1G27360.4	K	k:738	conserved	Land plants	conserved	Green plants	1	2165-2184~7
ath-miR156j	AT1G27370.1	K	k:1135	conserved	Land plants	conserved	Green plants	1	1085-1104~6
ath-miR156j	AT1G27370.2	K	k:1110	conserved	Land plants	conserved	Green plants
ath-miR156j	AT1G27370.3	K	k:654	conserved	Land plants	conserved	Green plants
ath-miR156j	AT1G27370.4	K	k:1135	conserved	Land plants	conserved	Green plants	1	1193-1212~7
ath-miR156j	AT1G27370.5	K	k:648	conserved	Land plants	conserved	Green plants
ath-miR156j	AT1G27370.6	K	k:634	conserved	Land plants	conserved	Green plants	1	2739-2758~5
ath-miR156j	AT1G27370.7	K	k:1121	conserved	Land plants	conserved	Green plants
ath-miR156j	AT1G29890.1	K	k:1135	conserved	Land plants	conserved	Green plants
ath-miR156j	AT1G29890.2	K	k:1020	conserved	Land plants	conserved	Green plants
ath-miR156j	AT1G29890.3	K	k:1008	conserved	Land plants	conserved	Green plants
ath-miR156j	AT1G34200.1	G	g:9	conserved	Land plants	conserved	Green plants
ath-miR156j	AT1G35516.2	K	k:713	conserved	Land plants	non-conserved	Arabidopsis thaliana
ath-miR156j	AT1G44050.1	G	g:5	conserved	Land plants	conserved	Eudicots
ath-miR156j	AT1G52820.1	G	g:29	conserved	Land plants	conserved	Seed plants
ath-miR156j	AT1G52820.2	G	g:24	conserved	Land plants	conserved	Seed plants
ath-miR156j	AT1G53160.1	K	k:1117	conserved	Land plants	conserved	Green plants
ath-miR156j	AT1G56720.3	G	g:163	conserved	Land plants	conserved	Green plants
ath-miR156j	AT1G67040.1	K	k:613	conserved	Land plants	conserved	Land plants
ath-miR156j	AT1G67040.2	K	k:613	conserved	Land plants	conserved	Land plants
ath-miR156j	AT1G69170.1	K	k:991	conserved	Land plants	conserved	Green plants	1	1297-1316~3
ath-miR156j	AT1G71400.1	K	k:1054	conserved	Land plants	conserved	Green plants
ath-miR156j	AT2G05180.1	G	g:74	conserved	Land plants	conserved	Land plants
ath-miR156j	AT2G07718.1	K	k:1135	conserved	Land plants	conserved	Eudicots
ath-miR156j	AT2G17220.1	K	k:945	conserved	Land plants	conserved	Land plants
ath-miR156j	AT2G17220.2	K	k:945	conserved	Land plants	conserved	Land plants
ath-miR156j	AT2G17640.1	K	k:876	conserved	Land plants	conserved	Green plants
ath-miR156j	AT2G28605.1	K	k:1101	conserved	Land plants	conserved	Green plants
ath-miR156j	AT2G33810.1	K	k:1131	conserved	Land plants	conserved	Green plants
ath-miR156j	AT2G42200.1	K	k:1110	conserved	Land plants	conserved	Green plants	1	1175-1194~5
ath-miR156j	AT3G06330.2	K	k:1126	conserved	Land plants	conserved	Green plants
ath-miR156j	AT3G08680.1	G	g:8	conserved	Land plants	conserved	Land plants
ath-miR156j	AT3G08680.2	G	g:8	conserved	Land plants	conserved	Land plants
ath-miR156j	AT3G15270.1	K	k:914	conserved	Land plants	conserved	Green plants	1	1620-1639~6
ath-miR156j	AT3G26060.1	G	g:10	conserved	Land plants	conserved	Green plants
ath-miR156j	AT3G26060.2	G	g:10	conserved	Land plants	conserved	Green plants
ath-miR156j	AT3G27150.1	KL	k:991,l:5	conserved	Land plants	conserved	Land plants
ath-miR156j	AT3G27150.2	KL	k:877,l:5	conserved	Land plants	conserved	Land plants
ath-miR156j	AT3G28690.1	K	k:985	conserved	Land plants	conserved	Land plants
ath-miR156j	AT3G47170.1	K	k:1055	conserved	Land plants	conserved	Seed plants
ath-miR156j	AT3G57920.1	K	k:1132	conserved	Land plants	conserved	Green plants
ath-miR156j	AT3G62420.1	KL	k:422,l:106	conserved	Land plants	conserved	Green plants
ath-miR156j	AT4G14510.1	KL	k:1111,l:12	conserved	Land plants	conserved	Green plants
ath-miR156j	AT4G20700.1	K	k:1120	conserved	Land plants	conserved	Eudicots
ath-miR156j	AT4G20700.2	K	k:1003	conserved	Land plants	conserved	Eudicots
ath-miR156j	AT4G22530.1	KL	k:1099,l:20	conserved	Land plants	conserved	Green plants
ath-miR156j	AT4G22530.2	KL	k:1075,l:24	conserved	Land plants	conserved	Green plants
ath-miR156j	AT4G28070.1	K	k:1070	conserved	Land plants	conserved	Green plants
ath-miR156j	AT4G28070.2	K	k:1133	conserved	Land plants	conserved	Green plants
ath-miR156j	AT4G33300.1	K	k:381	conserved	Land plants	conserved	Green plants
ath-miR156j	AT4G33300.2	K	k:602	conserved	Land plants	conserved	Green plants
ath-miR156j	AT4G35730.1	K	k:1126	conserved	Land plants	conserved	Green plants
ath-miR156j	AT5G25170.1	G	g:78	conserved	Land plants	conserved	Green plants
ath-miR156j	AT5G25170.2	G	g:30	conserved	Land plants	conserved	Green plants
ath-miR156j	AT5G42040.1	KL	k:878,l:23	conserved	Land plants	conserved	Green plants
ath-miR156j	AT5G43270.1	K	k:284	conserved	Land plants	conserved	Green plants
ath-miR156j	AT5G43270.2	K	k:479	conserved	Land plants	conserved	Green plants
ath-miR156j	AT5G43270.3	K	k:374	conserved	Land plants	conserved	Green plants
ath-miR156j	AT5G50570.1	K	k:1135	conserved	Land plants	conserved	Green plants	1	1264-1283~13
ath-miR156j	AT5G50570.2	K	k:1135	conserved	Land plants	conserved	Green plants	1	1634-1653~11
ath-miR156j	AT5G50670.1	K	k:1135	conserved	Land plants	conserved	Green plants
ath-miR156j	AT5G50670.2	K	k:1135	conserved	Land plants	conserved	Green plants
ath-miR156j	AT5G55100.11	G	g:2	conserved	Land plants	conserved	Green plants
ath-miR156j	AT5G55100.3	G	g:2	conserved	Land plants	conserved	Green plants
ath-miR156j	AT5G55100.5	G	g:2	conserved	Land plants	conserved	Green plants
ath-miR156j	AT5G55100.9	G	g:2	conserved	Land plants	conserved	Green plants
ath-miR157a-3p	AT1G34000.1	K	k:1021	conserved	Rosids	conserved	Green plants
ath-miR157a-3p	AT2G43710.1	KL	k:770,l:334	conserved	Rosids	conserved	Green plants	1	596-616~1
ath-miR157a-3p	AT2G43710.2	KL	k:784,l:345	conserved	Rosids	conserved	Green plants
ath-miR157a-5p	AT1G22000.1	KL	k:962,l:1	conserved	Vascular plants	conserved	Flowering plants
ath-miR157a-5p	AT1G27360.1	K	k:778	conserved	Vascular plants	conserved	Green plants	1	2330-2350~4
ath-miR157a-5p	AT1G27360.2	K	k:978	conserved	Vascular plants	conserved	Green plants	1	1398-1418~9
ath-miR157a-5p	AT1G27360.3	K	k:780	conserved	Vascular plants	conserved	Green plants	1	2061-2081~6
ath-miR157a-5p	AT1G27360.4	K	k:738	conserved	Vascular plants	conserved	Green plants	1	2165-2185~9
ath-miR157a-5p	AT1G27370.1	K	k:1135	conserved	Vascular plants	conserved	Green plants	1	1085-1105~6
ath-miR157a-5p	AT1G27370.2	K	k:1110	conserved	Vascular plants	conserved	Green plants	1	1481-1501~9
ath-miR157a-5p	AT1G27370.3	K	k:654	conserved	Vascular plants	conserved	Green plants	1	2416-2436~7
ath-miR157a-5p	AT1G27370.4	K	k:1135	conserved	Vascular plants	conserved	Green plants	1	1193-1213~6
ath-miR157a-5p	AT1G27370.5	K	k:648	conserved	Vascular plants	conserved	Green plants	1	2372-2392~8
ath-miR157a-5p	AT1G27370.6	K	k:634	conserved	Vascular plants	conserved	Green plants	1	2739-2759~7
ath-miR157a-5p	AT1G27370.7	K	k:1121	conserved	Vascular plants	conserved	Green plants	1	1261-1281~6
ath-miR157a-5p	AT1G32140.1	KL	k:719,l:38	conserved	Vascular plants	conserved	Rosids
ath-miR157a-5p	AT1G53160.1	KL	k:1110,l:7	conserved	Vascular plants	conserved	Green plants	1	750-770~5
ath-miR157a-5p	AT1G69170.1	K	k:991	conserved	Vascular plants	conserved	Green plants	1	1297-1317~9
ath-miR157a-5p	AT2G22370.1	K	k:1118	conserved	Vascular plants	conserved	Land plants	1	524-545~1
ath-miR157a-5p	AT2G42200.1	K	k:1110	conserved	Vascular plants	conserved	Green plants	1	1175-1195~5
ath-miR157a-5p	AT3G19565.1	KL	k:974,l:143	conserved	Vascular plants	conserved	Rosids
ath-miR157a-5p	AT3G57920.1	K	k:1132	conserved	Vascular plants	conserved	Green plants	1	845-865~3
ath-miR157a-5p	AT3G59780.1	G	g:5	conserved	Vascular plants	conserved	Green plants
ath-miR157a-5p	AT4G14510.1	G	g:9	conserved	Vascular plants	conserved	Green plants
ath-miR157a-5p	AT5G08620.1	K	k:819	conserved	Vascular plants	conserved	Green plants
ath-miR157a-5p	AT5G43270.1	K	k:284	conserved	Vascular plants	conserved	Green plants	1	1891-1911~8
ath-miR157a-5p	AT5G43270.2	K	k:479	conserved	Vascular plants	conserved	Green plants	1	1236-1256~6
ath-miR157a-5p	AT5G43270.3	K	k:374	conserved	Vascular plants	conserved	Green plants	1	1787-1807~7
ath-miR157a-5p	AT5G50570.1	K	k:1135	conserved	Vascular plants	conserved	Green plants	1	1264-1284~4
ath-miR157a-5p	AT5G50570.2	K	k:1135	conserved	Vascular plants	conserved	Green plants	1	1634-1654~5
ath-miR157a-5p	AT5G50670.1	K	k:1135	conserved	Vascular plants	conserved	Green plants	1	1264-1284~6
ath-miR157a-5p	AT5G50670.2	K	k:1135	conserved	Vascular plants	conserved	Green plants	1	1283-1303~6
ath-miR157b-3p	AT1G34000.1	K	k:1021	conserved	Rosids	conserved	Green plants
ath-miR157b-3p	AT2G43710.1	KL	k:770,l:334	conserved	Rosids	conserved	Green plants
ath-miR157b-3p	AT2G43710.2	KL	k:784,l:345	conserved	Rosids	conserved	Green plants
ath-miR157b-5p	AT1G22000.1	KL	k:962,l:1	conserved	Vascular plants	conserved	Flowering plants
ath-miR157b-5p	AT1G27360.1	K	k:778	conserved	Vascular plants	conserved	Green plants
ath-miR157b-5p	AT1G27360.2	K	k:978	conserved	Vascular plants	conserved	Green plants
ath-miR157b-5p	AT1G27360.3	K	k:780	conserved	Vascular plants	conserved	Green plants
ath-miR157b-5p	AT1G27360.4	K	k:738	conserved	Vascular plants	conserved	Green plants
ath-miR157b-5p	AT1G27370.1	K	k:1135	conserved	Vascular plants	conserved	Green plants
ath-miR157b-5p	AT1G27370.2	K	k:1110	conserved	Vascular plants	conserved	Green plants
ath-miR157b-5p	AT1G27370.3	K	k:654	conserved	Vascular plants	conserved	Green plants
ath-miR157b-5p	AT1G27370.4	K	k:1135	conserved	Vascular plants	conserved	Green plants
ath-miR157b-5p	AT1G27370.5	K	k:648	conserved	Vascular plants	conserved	Green plants
ath-miR157b-5p	AT1G27370.6	K	k:634	conserved	Vascular plants	conserved	Green plants
ath-miR157b-5p	AT1G27370.7	K	k:1121	conserved	Vascular plants	conserved	Green plants
ath-miR157b-5p	AT1G32140.1	KL	k:719,l:38	conserved	Vascular plants	conserved	Rosids
ath-miR157b-5p	AT1G53160.1	KL	k:1110,l:7	conserved	Vascular plants	conserved	Green plants
ath-miR157b-5p	AT1G69170.1	K	k:991	conserved	Vascular plants	conserved	Green plants
ath-miR157b-5p	AT2G22370.1	K	k:1118	conserved	Vascular plants	conserved	Land plants
ath-miR157b-5p	AT2G42200.1	K	k:1110	conserved	Vascular plants	conserved	Green plants
ath-miR157b-5p	AT3G19565.1	KL	k:974,l:143	conserved	Vascular plants	conserved	Rosids
ath-miR157b-5p	AT3G57920.1	K	k:1132	conserved	Vascular plants	conserved	Green plants
ath-miR157b-5p	AT3G59780.1	G	g:5	conserved	Vascular plants	conserved	Green plants
ath-miR157b-5p	AT4G14510.1	G	g:9	conserved	Vascular plants	conserved	Green plants
ath-miR157b-5p	AT5G08620.1	K	k:819	conserved	Vascular plants	conserved	Green plants
ath-miR157b-5p	AT5G43270.1	K	k:284	conserved	Vascular plants	conserved	Green plants
ath-miR157b-5p	AT5G43270.2	K	k:479	conserved	Vascular plants	conserved	Green plants
ath-miR157b-5p	AT5G43270.3	K	k:374	conserved	Vascular plants	conserved	Green plants
ath-miR157b-5p	AT5G50570.1	K	k:1135	conserved	Vascular plants	conserved	Green plants
ath-miR157b-5p	AT5G50570.2	K	k:1135	conserved	Vascular plants	conserved	Green plants
ath-miR157b-5p	AT5G50670.1	K	k:1135	conserved	Vascular plants	conserved	Green plants
ath-miR157b-5p	AT5G50670.2	K	k:1135	conserved	Vascular plants	conserved	Green plants
ath-miR157c-5p	AT1G22000.1	KL	k:962,l:1	conserved	Vascular plants	conserved	Flowering plants
ath-miR157c-5p	AT1G27360.1	K	k:778	conserved	Vascular plants	conserved	Green plants	1	2330-2350~9
ath-miR157c-5p	AT1G27360.2	K	k:978	conserved	Vascular plants	conserved	Green plants	1	1398-1418~5
ath-miR157c-5p	AT1G27360.3	K	k:780	conserved	Vascular plants	conserved	Green plants	1	2061-2081~6
ath-miR157c-5p	AT1G27360.4	K	k:738	conserved	Vascular plants	conserved	Green plants	1	2165-2185~5
ath-miR157c-5p	AT1G27370.1	K	k:1135	conserved	Vascular plants	conserved	Green plants	1	1085-1105~8
ath-miR157c-5p	AT1G27370.2	K	k:1110	conserved	Vascular plants	conserved	Green plants	1	1481-1501~4
ath-miR157c-5p	AT1G27370.3	K	k:654	conserved	Vascular plants	conserved	Green plants	1	2416-2436~6
ath-miR157c-5p	AT1G27370.4	K	k:1135	conserved	Vascular plants	conserved	Green plants	1	1193-1213~7
ath-miR157c-5p	AT1G27370.5	K	k:648	conserved	Vascular plants	conserved	Green plants	1	2372-2392~6
ath-miR157c-5p	AT1G27370.6	K	k:634	conserved	Vascular plants	conserved	Green plants	1	2739-2759~6
ath-miR157c-5p	AT1G27370.7	K	k:1121	conserved	Vascular plants	conserved	Green plants	1	1261-1281~8
ath-miR157c-5p	AT1G32140.1	KL	k:719,l:38	conserved	Vascular plants	conserved	Rosids
ath-miR157c-5p	AT1G53160.1	KL	k:1110,l:7	conserved	Vascular plants	conserved	Green plants	1	750-770~3
ath-miR157c-5p	AT1G69170.1	K	k:991	conserved	Vascular plants	conserved	Green plants
ath-miR157c-5p	AT2G22370.1	K	k:1118	conserved	Vascular plants	conserved	Land plants	1	524-545~2
ath-miR157c-5p	AT2G42200.1	K	k:1110	conserved	Vascular plants	conserved	Green plants	1	1175-1195~6
ath-miR157c-5p	AT3G19565.1	KL	k:974,l:143	conserved	Vascular plants	conserved	Rosids
ath-miR157c-5p	AT3G57920.1	K	k:1132	conserved	Vascular plants	conserved	Green plants	1	845-865~6
ath-miR157c-5p	AT3G59780.1	G	g:5	conserved	Vascular plants	conserved	Green plants
ath-miR157c-5p	AT4G14510.1	G	g:9	conserved	Vascular plants	conserved	Green plants
ath-miR157c-5p	AT5G08620.1	K	k:819	conserved	Vascular plants	conserved	Green plants
ath-miR157c-5p	AT5G43270.1	K	k:284	conserved	Vascular plants	conserved	Green plants	1	1891-1911~5
ath-miR157c-5p	AT5G43270.2	K	k:479	conserved	Vascular plants	conserved	Green plants	1	1236-1256~9
ath-miR157c-5p	AT5G43270.3	K	k:374	conserved	Vascular plants	conserved	Green plants	1	1787-1807~6
ath-miR157c-5p	AT5G50570.1	K	k:1135	conserved	Vascular plants	conserved	Green plants	1	1264-1284~5
ath-miR157c-5p	AT5G50570.2	K	k:1135	conserved	Vascular plants	conserved	Green plants	1	1634-1654~3
ath-miR157c-5p	AT5G50670.1	K	k:1135	conserved	Vascular plants	conserved	Green plants	1	1264-1284~3
ath-miR157c-5p	AT5G50670.2	K	k:1135	conserved	Vascular plants	conserved	Green plants	1	1283-1303~2
ath-miR157d	AT1G22000.1	KL	k:962,l:15	conserved	Vascular plants	conserved	Flowering plants
ath-miR157d	AT1G26890.1	K	k:934	conserved	Vascular plants	conserved	Flowering plants
ath-miR157d	AT1G26890.2	K	k:931	conserved	Vascular plants	conserved	Flowering plants
ath-miR157d	AT1G26890.3	K	k:931	conserved	Vascular plants	conserved	Flowering plants
ath-miR157d	AT1G26890.4	K	k:931	conserved	Vascular plants	conserved	Flowering plants
ath-miR157d	AT1G26890.5	K	k:931	conserved	Vascular plants	conserved	Flowering plants
ath-miR157d	AT1G27360.1	K	k:778	conserved	Vascular plants	conserved	Green plants
ath-miR157d	AT1G27360.2	K	k:978	conserved	Vascular plants	conserved	Green plants
ath-miR157d	AT1G27360.3	K	k:780	conserved	Vascular plants	conserved	Green plants
ath-miR157d	AT1G27360.4	K	k:738	conserved	Vascular plants	conserved	Green plants
ath-miR157d	AT1G27370.1	K	k:1135	conserved	Vascular plants	conserved	Green plants
ath-miR157d	AT1G27370.2	K	k:1110	conserved	Vascular plants	conserved	Green plants
ath-miR157d	AT1G27370.3	K	k:654	conserved	Vascular plants	conserved	Green plants
ath-miR157d	AT1G27370.4	K	k:1135	conserved	Vascular plants	conserved	Green plants
ath-miR157d	AT1G27370.5	K	k:648	conserved	Vascular plants	conserved	Green plants
ath-miR157d	AT1G27370.6	K	k:634	conserved	Vascular plants	conserved	Green plants
ath-miR157d	AT1G27370.7	K	k:1121	conserved	Vascular plants	conserved	Green plants
ath-miR157d	AT1G53160.1	K	k:1117	conserved	Vascular plants	conserved	Green plants
ath-miR157d	AT1G69170.1	K	k:991	conserved	Vascular plants	conserved	Green plants
ath-miR157d	AT2G35320.1	KL	k:976,l:55	conserved	Vascular plants	conserved	Green plants	1	72-91~1
ath-miR157d	AT2G42200.1	K	k:1110	conserved	Vascular plants	conserved	Green plants
ath-miR157d	AT3G15270.1	K	k:914	conserved	Vascular plants	conserved	Green plants
ath-miR157d	AT3G19565.1	KL	k:974,l:143	conserved	Vascular plants	conserved	Rosids
ath-miR157d	AT3G57920.1	K	k:1132	conserved	Vascular plants	conserved	Green plants
ath-miR157d	AT4G14510.1	G	g:9	conserved	Vascular plants	conserved	Green plants
ath-miR157d	AT5G08620.1	K	k:819	conserved	Vascular plants	conserved	Green plants	1	1493-1512~2
ath-miR157d	AT5G18590.1	K	k:969	conserved	Vascular plants	conserved	Land plants
ath-miR157d	AT5G18590.2	K	k:971	conserved	Vascular plants	conserved	Land plants
ath-miR157d	AT5G24860.2	G	g:2	conserved	Vascular plants	conserved	Land plants
ath-miR157d	AT5G24860.3	G	g:2	conserved	Vascular plants	conserved	Land plants
ath-miR157d	AT5G43270.1	K	k:284	conserved	Vascular plants	conserved	Green plants
ath-miR157d	AT5G43270.2	K	k:479	conserved	Vascular plants	conserved	Green plants
ath-miR157d	AT5G43270.3	K	k:374	conserved	Vascular plants	conserved	Green plants
ath-miR157d	AT5G50570.1	K	k:1135	conserved	Vascular plants	conserved	Green plants
ath-miR157d	AT5G50570.2	K	k:1135	conserved	Vascular plants	conserved	Green plants
ath-miR157d	AT5G50670.1	K	k:1135	conserved	Vascular plants	conserved	Green plants
ath-miR157d	AT5G50670.2	K	k:1135	conserved	Vascular plants	conserved	Green plants
ath-miR158a-3p	AT1G09040.1	K	k:1111	conserved	Brassicaceae	conserved	Land plants
ath-miR158a-3p	AT1G12615.1	KL	k:862,l:5	conserved	Brassicaceae	conserved	Flowering plants
ath-miR158a-3p	AT1G49910.1	KL	k:1074,l:3	conserved	Brassicaceae	conserved	Green plants
ath-miR158a-3p	AT1G64100.1	K	k:820	conserved	Brassicaceae	conserved	Brassicaceae
ath-miR158a-3p	AT1G64100.2	K	k:927	conserved	Brassicaceae	conserved	Brassicaceae
ath-miR158a-3p	AT1G64100.3	K	k:927	conserved	Brassicaceae	conserved	Brassicaceae
ath-miR158a-3p	AT1G69040.1	KL	k:867,l:2	conserved	Brassicaceae	conserved	Green plants
ath-miR158a-3p	AT2G03210.1	K	k:763	conserved	Brassicaceae	conserved	Green plants
ath-miR158a-3p	AT2G03210.2	K	k:528	conserved	Brassicaceae	conserved	Green plants
ath-miR158a-3p	AT2G03210.3	K	k:763	conserved	Brassicaceae	conserved	Green plants
ath-miR158a-3p	AT2G03220.1	K	k:533	conserved	Brassicaceae	conserved	Green plants	1	1500-1519~6
ath-miR158a-3p	AT3G03580.1	K	k:1125	conserved	Brassicaceae	conserved	Green plants
ath-miR158a-3p	AT3G29590.1	KL	k:438,l:1	conserved	Brassicaceae	conserved	Flowering plants
ath-miR158a-3p	AT4G17565.1	KL	k:927,l:59	conserved	Brassicaceae	conserved	Brassicaceae
ath-miR158a-3p	AT5G61010.1	K	k:1086	conserved	Brassicaceae	conserved	Green plants
ath-miR158a-3p	AT5G61010.2	K	k:1122	conserved	Brassicaceae	conserved	Green plants
ath-miR158a-5p	AT1G47790.1	G	g:12	conserved	Brassicaceae	conserved	Eudicots
ath-miR158a-5p	AT1G48745.1	KL	k:404,l:16	conserved	Brassicaceae	conserved	Eudicots
ath-miR158a-5p	AT1G63610.1	KL	k:1031,l:35	conserved	Brassicaceae	conserved	Green plants
ath-miR158a-5p	AT1G63610.3	KL	k:1049,l:42	conserved	Brassicaceae	conserved	Green plants
ath-miR158a-5p	AT1G71866.1	G	g:30	conserved	Brassicaceae	conserved	Land plants
ath-miR158a-5p	AT3G10490.1	G	g:23	conserved	Brassicaceae	conserved	Land plants
ath-miR158a-5p	AT3G10490.2	G	g:30	conserved	Brassicaceae	conserved	Land plants
ath-miR158a-5p	AT3G10490.3	G	g:16	conserved	Brassicaceae	conserved	Land plants
ath-miR158a-5p	AT3G10490.4	G	g:30	conserved	Brassicaceae	conserved	Land plants
ath-miR158a-5p	AT3G47580.1	KL	k:1022,l:49	conserved	Brassicaceae	conserved	Land plants
ath-miR158a-5p	AT4G14800.1	G	g:25	conserved	Brassicaceae	conserved	Green plants
ath-miR158a-5p	AT4G14800.2	G	g:26	conserved	Brassicaceae	conserved	Green plants
ath-miR158a-5p	AT4G22590.1	KL	k:913,l:25	conserved	Brassicaceae	conserved	Green plants
ath-miR158a-5p	AT4G26120.1	KL	k:1096,l:30	conserved	Brassicaceae	conserved	Land plants
ath-miR158a-5p	AT4G26120.2	KL	k:975,l:26	conserved	Brassicaceae	conserved	Land plants
ath-miR158a-5p	AT5G27395.1	KL	k:619,l:16	conserved	Brassicaceae	conserved	Green plants
ath-miR158a-5p	AT5G27395.2	KL	k:993,l:38	conserved	Brassicaceae	conserved	Green plants
ath-miR158a-5p	AT5G59580.1	G	g:4	conserved	Brassicaceae	conserved	Flowering plants
ath-miR158b	AT1G09040.1	G	g:14	conserved	Brassicaceae	conserved	Land plants
ath-miR158b	AT1G64100.1	KL	k:814,l:9	conserved	Brassicaceae	conserved	Brassicaceae
ath-miR158b	AT1G64100.2	KL	k:919,l:11	conserved	Brassicaceae	conserved	Brassicaceae
ath-miR158b	AT1G64100.3	KL	k:919,l:11	conserved	Brassicaceae	conserved	Brassicaceae
ath-miR158b	AT1G68238.1	G	g:6	conserved	Brassicaceae	conserved	Brassicaceae
ath-miR158b	AT1G69040.1	G	g:9	conserved	Brassicaceae	conserved	Green plants
ath-miR158b	AT2G03210.1	KL	k:756,l:7	conserved	Brassicaceae	conserved	Green plants
ath-miR158b	AT2G03210.2	KL	k:522,l:6	conserved	Brassicaceae	conserved	Green plants
ath-miR158b	AT2G03210.3	KL	k:756,l:7	conserved	Brassicaceae	conserved	Green plants
ath-miR158b	AT2G03220.1	KL	k:527,l:6	conserved	Brassicaceae	conserved	Green plants
ath-miR158b	AT3G29590.1	G	g:7	conserved	Brassicaceae	conserved	Flowering plants
ath-miR158b	AT4G02420.1	G	g:200	conserved	Brassicaceae	conserved	Land plants
ath-miR158b	AT4G17565.1	G	g:11	conserved	Brassicaceae	conserved	Brassicaceae
ath-miR158b	AT5G61010.1	KL	k:1075,l:11	conserved	Brassicaceae	conserved	Green plants
ath-miR158b	AT5G61010.2	KL	k:1111,l:11	conserved	Brassicaceae	conserved	Green plants
ath-miR159a	AT1G29010.1	KL	k:1129,l:3	conserved	Seed plants	conserved	Rosids
ath-miR159a	AT2G26950.1	K	k:1131	conserved	Seed plants	conserved	Green plants
ath-miR159a	AT2G27590.1	G	g:2	conserved	Seed plants	conserved	Land plants
ath-miR159a	AT2G32460.1	K	k:1018	conserved	Seed plants	conserved	Green plants
ath-miR159a	AT2G32460.2	K	k:1033	conserved	Seed plants	conserved	Green plants	1	972-992~1
ath-miR159a	AT2G34010.1	K	k:988	conserved	Seed plants	conserved	Rosids	1	425-445~7
ath-miR159a	AT2G34010.2	K	k:974	conserved	Seed plants	conserved	Rosids	1	758-778~7
ath-miR159a	AT3G11440.1	K	k:382	conserved	Seed plants	conserved	Green plants	1	1212-1232~8
ath-miR159a	AT3G11440.2	K	k:557	conserved	Seed plants	conserved	Green plants	1	977-997~5
ath-miR159a	AT3G11440.3	K	k:557	conserved	Seed plants	conserved	Green plants	1	1158-1178~4
ath-miR159a	AT3G11440.4	K	k:557	conserved	Seed plants	conserved	Green plants	1	1149-1169~5
ath-miR159a	AT3G60460.1	K	k:1039	conserved	Seed plants	conserved	Green plants
ath-miR159a	AT4G37770.1	K	k:904	conserved	Seed plants	conserved	Green plants
ath-miR159a	AT5G06100.1	K	k:1135	conserved	Seed plants	conserved	Green plants	1	1054-1074~5
ath-miR159a	AT5G06100.2	K	k:1020	conserved	Seed plants	conserved	Green plants	1	1045-1065~5
ath-miR159a	AT5G06100.3	K	k:1027	conserved	Seed plants	conserved	Green plants	1	1321-1341~4
ath-miR159a	AT5G06100.4	K	k:1027	conserved	Seed plants	conserved	Green plants	1	1597-1617~4
ath-miR159a	AT5G06100.5	K	k:1058	conserved	Seed plants	conserved	Green plants	1	1446-1466~4
ath-miR159a	AT5G55020.1	KL	k:960,l:7	conserved	Seed plants	conserved	Green plants
ath-miR159b-3p	AT2G26950.1	K	k:1131	conserved	Seed plants	conserved	Green plants
ath-miR159b-3p	AT2G32460.1	K	k:1018	conserved	Seed plants	conserved	Green plants
ath-miR159b-3p	AT2G32460.2	K	k:1033	conserved	Seed plants	conserved	Green plants
ath-miR159b-3p	AT2G34010.1	K	k:988	conserved	Seed plants	conserved	Rosids
ath-miR159b-3p	AT2G34010.2	K	k:974	conserved	Seed plants	conserved	Rosids
ath-miR159b-3p	AT2G41060.1	G	g:1	conserved	Seed plants	conserved	Seed plants
ath-miR159b-3p	AT2G41060.2	G	g:2	conserved	Seed plants	conserved	Seed plants
ath-miR159b-3p	AT2G41060.3	G	g:1	conserved	Seed plants	conserved	Seed plants
ath-miR159b-3p	AT4G26930.1	K	k:886	conserved	Seed plants	conserved	Green plants
ath-miR159b-3p	AT4G27330.1	K	k:1096	conserved	Seed plants	conserved	Rosids
ath-miR159b-3p	AT5G55020.1	KL	k:960,l:7	conserved	Seed plants	conserved	Green plants
ath-miR159b-5p	AT1G55800.1	K	k:1116	conserved	Rosids	conserved	Green plants
ath-miR159b-5p	AT1G77260.1	G	g:4	conserved	Rosids	conserved	Land plants
ath-miR159b-5p	AT3G56920.1	KL	k:548,l:2	conserved	Rosids	conserved	Green plants
ath-miR159b-5p	AT3G58780.1	K	k:1131	conserved	Rosids	conserved	Green plants
ath-miR159b-5p	AT3G58780.2	K	k:1131	conserved	Rosids	conserved	Green plants
ath-miR159b-5p	AT3G58780.3	K	k:1073	conserved	Rosids	conserved	Green plants
ath-miR159b-5p	AT3G58780.4	K	k:1118	conserved	Rosids	conserved	Green plants
ath-miR159b-5p	AT3G58780.5	K	k:1130	conserved	Rosids	conserved	Green plants
ath-miR159b-5p	AT3G61040.1	G	g:6	conserved	Rosids	conserved	Land plants
ath-miR159b-5p	AT3G61040.2	G	g:6	conserved	Rosids	conserved	Land plants
ath-miR159b-5p	AT4G36770.1	K	k:1118	conserved	Rosids	conserved	Land plants
ath-miR159b-5p	AT5G17770.1	KL	k:1131,l:4	conserved	Rosids	conserved	Green plants
ath-miR159b-5p	AT5G60910.1	KL	k:1116,l:4	conserved	Rosids	conserved	Green plants	1	611-631~1
ath-miR159b-5p	AT5G60910.2	KL	k:1130,l:4	conserved	Rosids	conserved	Green plants
ath-miR159c	AT2G26950.1	K	k:1131	conserved	Land plants	conserved	Green plants
ath-miR159c	AT3G11440.1	K	k:382	conserved	Land plants	conserved	Green plants	1	1212-1232~3
ath-miR159c	AT3G11440.2	K	k:557	conserved	Land plants	conserved	Green plants	1	977-997~6
ath-miR159c	AT3G11440.3	K	k:557	conserved	Land plants	conserved	Green plants	1	1158-1178~6
ath-miR159c	AT3G11440.4	K	k:557	conserved	Land plants	conserved	Green plants	1	1149-1169~6
ath-miR159c	AT3G60460.1	K	k:1039	conserved	Land plants	conserved	Green plants
ath-miR159c	AT4G26930.1	K	k:886	conserved	Land plants	conserved	Green plants
ath-miR159c	AT4G27330.1	K	k:1096	conserved	Land plants	conserved	Rosids
ath-miR159c	AT4G37770.1	K	k:904	conserved	Land plants	conserved	Green plants
ath-miR159c	AT5G06100.1	K	k:1135	conserved	Land plants	conserved	Green plants	1	1054-1074~5
ath-miR159c	AT5G06100.2	K	k:1020	conserved	Land plants	conserved	Green plants	1	1045-1065~5
ath-miR159c	AT5G06100.3	K	k:1027	conserved	Land plants	conserved	Green plants	1	1321-1341~6
ath-miR159c	AT5G06100.4	K	k:1027	conserved	Land plants	conserved	Green plants	1	1597-1617~6
ath-miR159c	AT5G06100.5	K	k:1058	conserved	Land plants	conserved	Green plants	1	1446-1466~8
ath-miR159c	AT5G55020.1	K	k:999	conserved	Land plants	conserved	Green plants
ath-miR160a-3p	AT3G47010.1	KL	k:912,l:68	conserved	Eudicots	conserved	Land plants
ath-miR160a-3p	AT3G47010.2	KL	k:944,l:69	conserved	Eudicots	conserved	Land plants
ath-miR160a-3p	AT3G47010.3	KL	k:879,l:64	conserved	Eudicots	conserved	Land plants
ath-miR160a-5p	AT1G77850.1	K	k:1095	conserved	Land plants	conserved	Flowering plants	1	1648-1668~12
ath-miR160a-5p	AT1G77850.2	K	k:1039	conserved	Land plants	conserved	Flowering plants	1	1517-1537~8
ath-miR160a-5p	AT2G28350.1	K	k:762	conserved	Land plants	conserved	Green plants	1	1771-1791~10
ath-miR160a-5p	AT2G28350.2	K	k:759	conserved	Land plants	conserved	Green plants	1	1598-1618~8
ath-miR160a-5p	AT4G30080.1	K	k:1088	conserved	Land plants	conserved	Green plants	1	1526-1546~6
ath-miR160b	AT1G77850.1	K	k:1095	conserved	Land plants	conserved	Flowering plants
ath-miR160b	AT1G77850.2	K	k:1039	conserved	Land plants	conserved	Flowering plants
ath-miR160b	AT2G28350.1	K	k:762	conserved	Land plants	conserved	Green plants
ath-miR160b	AT2G28350.2	K	k:759	conserved	Land plants	conserved	Green plants
ath-miR160b	AT4G30080.1	K	k:1088	conserved	Land plants	conserved	Green plants
ath-miR160c-5p	AT1G77850.1	K	k:1095	conserved	Land plants	conserved	Flowering plants	1	1648-1668~4
ath-miR160c-5p	AT1G77850.2	K	k:1039	conserved	Land plants	conserved	Flowering plants	1	1517-1537~8
ath-miR160c-5p	AT2G28350.1	K	k:762	conserved	Land plants	conserved	Green plants	1	1771-1791~5
ath-miR160c-5p	AT2G28350.2	K	k:759	conserved	Land plants	conserved	Green plants	1	1598-1618~7
ath-miR160c-5p	AT4G30080.1	K	k:1088	conserved	Land plants	conserved	Green plants	1	1526-1546~9
ath-miR161.1	AT1G05750.1	G	g:1	conserved	Brassicaceae	conserved	Flowering plants
ath-miR161.1	AT1G05750.2	G	g:1	conserved	Brassicaceae	conserved	Flowering plants
ath-miR161.1	AT1G06580.1	KL	k:958,l:3	conserved	Brassicaceae	conserved	Flowering plants	1	1083-1103~8
ath-miR161.1	AT1G06580.2	KL	k:958,l:3	conserved	Brassicaceae	conserved	Flowering plants	1	890-910~8
ath-miR161.1	AT1G06580.3	KL	k:1131,l:4	conserved	Brassicaceae	conserved	Flowering plants	1	501-521~9
ath-miR161.1	AT1G62670.1	K	k:351	conserved	Brassicaceae	conserved	Flowering plants	1	1125-1145~10
ath-miR161.1	AT1G62670.2	KL	k:385,l:1	conserved	Brassicaceae	conserved	Flowering plants	1	968-988~9
ath-miR161.1	AT1G62910.1	K	k:1109	conserved	Brassicaceae	conserved	Flowering plants	1	1086-1106~10
ath-miR161.1	AT1G62914.1	G	g:90	conserved	Brassicaceae	conserved	Flowering plants
ath-miR161.1	AT1G62930.1	K	k:1020	conserved	Brassicaceae	conserved	Flowering plants	1	965-985~10
ath-miR161.1	AT1G63070.1	G	g:845	conserved	Brassicaceae	conserved	Flowering plants
ath-miR161.1	AT1G63080.1	KL	k:1090,l:1	conserved	Brassicaceae	conserved	Flowering plants	1	1008-1028~2
ath-miR161.1	AT1G63080.2	KL	k:1090,l:1	conserved	Brassicaceae	conserved	Flowering plants	1	1030-1050~3
ath-miR161.1	AT1G63080.3	KL	k:1092,l:1	conserved	Brassicaceae	conserved	Flowering plants	1	1015-1035~2
ath-miR161.1	AT1G63130.1	K	k:1128	conserved	Brassicaceae	conserved	Flowering plants	1	968-988~9
ath-miR161.1	AT1G63130.2	K	k:880	conserved	Brassicaceae	conserved	Flowering plants	1	1304-1324~9
ath-miR161.1	AT1G63150.1	KL	k:1067,l:16	conserved	Brassicaceae	conserved	Flowering plants	1	1079-1099~2
ath-miR161.1	AT1G63150.2	KL	k:1119,l:16	conserved	Brassicaceae	conserved	Flowering plants	1	974-994~5
ath-miR161.1	AT1G63230.1	K	k:386	conserved	Brassicaceae	conserved	Eudicots
ath-miR161.1	AT1G63400.1	K	k:1110	conserved	Brassicaceae	conserved	Flowering plants	1	1122-1142~3
ath-miR161.1	AT1G63630.1	KL	k:1039,l:24	conserved	Brassicaceae	conserved	Brassicaceae
ath-miR161.1	AT1G63630.2	KL	k:1029,l:24	conserved	Brassicaceae	conserved	Brassicaceae
ath-miR161.1	AT1G64583.1	K	k:1119	conserved	Brassicaceae	conserved	Flowering plants	1	738-758~9
ath-miR161.1	AT1G64583.2	K	k:978	conserved	Brassicaceae	conserved	Flowering plants	1	725-745~9
ath-miR161.1	AT5G16640.1	K	k:897	conserved	Brassicaceae	conserved	Flowering plants
ath-miR161.1	AT5G41170.1	K	k:1134	conserved	Brassicaceae	conserved	Flowering plants
ath-miR161.1	AT5G41170.2	K	k:1065	conserved	Brassicaceae	conserved	Flowering plants	1	872-892~1
ath-miR161.1	AT5G41170.3	K	k:1134	conserved	Brassicaceae	conserved	Flowering plants
ath-miR161.2	AT1G06580.1	KL	k:168,l:745	conserved	Brassicaceae	conserved	Flowering plants	1	1092-1112~2
ath-miR161.2	AT1G06580.2	KL	k:168,l:745	conserved	Brassicaceae	conserved	Flowering plants	1	899-919~2
ath-miR161.2	AT1G06580.3	KL	k:248,l:830	conserved	Brassicaceae	conserved	Flowering plants	1	510-530~2
ath-miR161.2	AT1G62590.1	K	k:1135	conserved	Brassicaceae	conserved	Flowering plants	1	1039-1059~10
ath-miR161.2	AT1G62590.2	K	k:1135	conserved	Brassicaceae	conserved	Flowering plants	1	989-1009~10
ath-miR161.2	AT1G62670.1	KL	k:284,l:5	conserved	Brassicaceae	conserved	Flowering plants
ath-miR161.2	AT1G62670.2	KL	k:310,l:5	conserved	Brassicaceae	conserved	Flowering plants
ath-miR161.2	AT1G62910.1	K	k:1113	conserved	Brassicaceae	conserved	Flowering plants	1	1095-1115~11
ath-miR161.2	AT1G62914.1	K	k:1051	conserved	Brassicaceae	conserved	Flowering plants	1	1229-1249~12
ath-miR161.2	AT1G62930.1	K	k:1024	conserved	Brassicaceae	conserved	Flowering plants	1	974-994~11
ath-miR161.2	AT1G63070.1	KL	k:1072,l:58	conserved	Brassicaceae	conserved	Flowering plants
ath-miR161.2	AT1G63080.1	K	k:891	conserved	Brassicaceae	conserved	Flowering plants
ath-miR161.2	AT1G63080.2	K	k:891	conserved	Brassicaceae	conserved	Flowering plants	1	1039-1059~1
ath-miR161.2	AT1G63080.3	K	k:891	conserved	Brassicaceae	conserved	Flowering plants
ath-miR161.2	AT1G63130.1	K	k:1132	conserved	Brassicaceae	conserved	Flowering plants	1	977-997~12
ath-miR161.2	AT1G63130.2	K	k:882	conserved	Brassicaceae	conserved	Flowering plants	1	1313-1333~10
ath-miR161.2	AT1G63150.1	K	k:1082	conserved	Brassicaceae	conserved	Flowering plants	1	1088-1108~10
ath-miR161.2	AT1G63150.2	K	k:1134	conserved	Brassicaceae	conserved	Flowering plants	1	983-1003~11
ath-miR161.2	AT1G63230.1	KL	k:379,l:7	conserved	Brassicaceae	conserved	Eudicots
ath-miR161.2	AT1G63330.1	K	k:1134	conserved	Brassicaceae	conserved	Green plants	1	799-819~10
ath-miR161.2	AT1G63330.2	K	k:1135	conserved	Brassicaceae	conserved	Green plants	1	764-784~11
ath-miR161.2	AT1G63330.3	K	k:1135	conserved	Brassicaceae	conserved	Green plants	1	764-784~10
ath-miR161.2	AT1G63400.1	K	k:1114	conserved	Brassicaceae	conserved	Flowering plants	1	1131-1151~9
ath-miR161.2	AT1G63630.1	KL	k:997,l:52	conserved	Brassicaceae	conserved	Brassicaceae
ath-miR161.2	AT1G64583.1	K	k:892	conserved	Brassicaceae	conserved	Flowering plants	1	747-767~3
ath-miR161.2	AT1G64583.2	K	k:779	conserved	Brassicaceae	conserved	Flowering plants	1	734-754~3
ath-miR161.2	AT1G77360.1	G	g:33	conserved	Brassicaceae	conserved	Land plants
ath-miR161.2	AT1G77360.2	G	g:51	conserved	Brassicaceae	conserved	Land plants
ath-miR161.2	AT2G41720.1	K	k:903	conserved	Brassicaceae	conserved	Green plants	1	1274-1294~6
ath-miR161.2	AT2G41720.2	K	k:903	conserved	Brassicaceae	conserved	Green plants	1	952-972~6
ath-miR161.2	AT2G41720.3	K	k:684	conserved	Brassicaceae	conserved	Green plants	1	1472-1492~6
ath-miR161.2	AT3G06250.1	G	g:2	conserved	Brassicaceae	conserved	Flowering plants
ath-miR161.2	AT3G06250.2	G	g:2	conserved	Brassicaceae	conserved	Flowering plants
ath-miR161.2	AT3G06250.3	G	g:2	conserved	Brassicaceae	conserved	Flowering plants
ath-miR161.2	AT3G12060.1	G	g:398	conserved	Brassicaceae	conserved	Green plants
ath-miR161.2	AT3G16710.1	K	k:788	conserved	Brassicaceae	conserved	Flowering plants	1	901-921~2
ath-miR161.2	AT3G16710.2	K	k:788	conserved	Brassicaceae	conserved	Flowering plants	1	932-952~1
ath-miR161.2	AT4G24390.1	G	g:172	conserved	Brassicaceae	conserved	Land plants
ath-miR161.2	AT4G24390.2	G	g:211	conserved	Brassicaceae	conserved	Land plants
ath-miR161.2	AT4G26800.1	K	k:900	conserved	Brassicaceae	conserved	Flowering plants
ath-miR161.2	AT4G26800.2	K	k:435	conserved	Brassicaceae	conserved	Flowering plants
ath-miR161.2	AT4G26800.3	K	k:501	conserved	Brassicaceae	conserved	Flowering plants
ath-miR161.2	AT5G16640.1	K	k:901	conserved	Brassicaceae	conserved	Flowering plants	1	877-897~2
ath-miR161.2	AT5G41170.1	K	k:1134	conserved	Brassicaceae	conserved	Flowering plants	1	740-760~10
ath-miR161.2	AT5G41170.2	K	k:1065	conserved	Brassicaceae	conserved	Flowering plants	1	881-901~10
ath-miR161.2	AT5G41170.3	K	k:1134	conserved	Brassicaceae	conserved	Flowering plants	1	630-650~10
ath-miR161.2	AT5G54710.1	G	g:27	conserved	Brassicaceae	conserved	Seed plants
ath-miR161.2	AT5G54710.2	G	g:27	conserved	Brassicaceae	conserved	Seed plants
ath-miR161.2	AT5G65560.1	K	k:221	conserved	Brassicaceae	conserved	Green plants	1	1178-1198~2
ath-miR161.2	AT5G65560.2	K	k:221	conserved	Brassicaceae	conserved	Green plants	1	1178-1198~1
ath-miR161.2	AT5G65560.3	K	k:220	conserved	Brassicaceae	conserved	Green plants	1	1232-1252~2
ath-miR163	AT1G15910.1	K	k:205	non-conserved	Arabidopsis thaliana	conserved	Land plants
ath-miR163	AT1G22260.1	K	k:1135	non-conserved	Arabidopsis thaliana	conserved	Green plants
ath-miR163	AT1G22260.2	K	k:1135	non-conserved	Arabidopsis thaliana	conserved	Green plants
ath-miR163	AT1G22260.3	K	k:1127	non-conserved	Arabidopsis thaliana	conserved	Green plants
ath-miR163	AT1G66690.1	K	k:924	non-conserved	Arabidopsis thaliana	conserved	Green plants	1	344-366~6
ath-miR163	AT1G66700.1	K	k:942	non-conserved	Arabidopsis thaliana	conserved	Green plants	1	345-367~9
ath-miR163	AT1G66700.3	K	k:861	non-conserved	Arabidopsis thaliana	conserved	Green plants	1	353-375~9
ath-miR163	AT1G66720.1	K	k:1133	non-conserved	Arabidopsis thaliana	conserved	Green plants	1	333-355~6
ath-miR163	AT3G44860.1	K	k:500	non-conserved	Arabidopsis thaliana	conserved	Green plants	1	380-402~7
ath-miR163	AT3G44870.1	K	k:957	non-conserved	Arabidopsis thaliana	conserved	Green plants
ath-miR164a	AT1G56010.1	K	k:373	conserved	Seed plants	conserved	Flowering plants	1	1706-1726~10
ath-miR164a	AT1G56010.2	K	k:1104	conserved	Seed plants	conserved	Flowering plants	1	802-822~4
ath-miR164a	AT2G47650.1	K	k:1000	conserved	Seed plants	conserved	Green plants
ath-miR164a	AT2G47650.2	K	k:1040	conserved	Seed plants	conserved	Green plants
ath-miR164a	AT3G12977.1	K	k:1013	conserved	Seed plants	conserved	Flowering plants	1	919-939~3
ath-miR164a	AT3G12977.2	K	k:1046	conserved	Seed plants	conserved	Flowering plants	1	728-748~2
ath-miR164a	AT3G15170.1	K	k:1131	conserved	Seed plants	conserved	Land plants	1	765-785~5
ath-miR164a	AT3G62830.1	K	k:962	conserved	Seed plants	conserved	Green plants
ath-miR164a	AT3G62830.2	K	k:1135	conserved	Seed plants	conserved	Green plants
ath-miR164a	AT5G07680.1	K	k:1124	conserved	Seed plants	conserved	Land plants	1	923-943~4
ath-miR164a	AT5G07680.2	K	k:1135	conserved	Seed plants	conserved	Land plants	1	651-671~4
ath-miR164a	AT5G53950.1	K	k:446	conserved	Seed plants	conserved	Land plants	1	832-852~3
ath-miR164a	AT5G61430.1	K	k:1077	conserved	Seed plants	conserved	Land plants	1	866-886~4
ath-miR164a	AT5G61430.2	K	k:1083	conserved	Seed plants	conserved	Land plants	1	970-990~4
ath-miR164b-3p	AT5G14770.1	K	k:1016	conserved	Brassicaceae	conserved	Flowering plants
ath-miR164b-3p	AT5G14770.2	K	k:1135	conserved	Brassicaceae	conserved	Flowering plants
ath-miR164b-3p	AT5G14770.3	K	k:1016	conserved	Brassicaceae	conserved	Flowering plants
ath-miR164b-3p	AT5G14770.4	K	k:1135	conserved	Brassicaceae	conserved	Flowering plants
ath-miR164b-3p	AT5G14770.5	K	k:1016	conserved	Brassicaceae	conserved	Flowering plants
ath-miR164b-5p	AT1G56010.1	K	k:373	conserved	Seed plants	conserved	Flowering plants
ath-miR164b-5p	AT1G56010.2	K	k:1104	conserved	Seed plants	conserved	Flowering plants
ath-miR164b-5p	AT2G47650.1	K	k:1000	conserved	Seed plants	conserved	Green plants
ath-miR164b-5p	AT2G47650.2	K	k:1040	conserved	Seed plants	conserved	Green plants
ath-miR164b-5p	AT3G12977.1	K	k:1013	conserved	Seed plants	conserved	Flowering plants	1	919-939~3
ath-miR164b-5p	AT3G12977.2	K	k:1046	conserved	Seed plants	conserved	Flowering plants	1	728-748~3
ath-miR164b-5p	AT3G15170.1	K	k:1131	conserved	Seed plants	conserved	Land plants
ath-miR164b-5p	AT3G62830.1	K	k:962	conserved	Seed plants	conserved	Green plants
ath-miR164b-5p	AT3G62830.2	K	k:1135	conserved	Seed plants	conserved	Green plants
ath-miR164b-5p	AT5G07680.1	K	k:1124	conserved	Seed plants	conserved	Land plants
ath-miR164b-5p	AT5G07680.2	K	k:1135	conserved	Seed plants	conserved	Land plants
ath-miR164b-5p	AT5G53950.1	K	k:446	conserved	Seed plants	conserved	Land plants
ath-miR164b-5p	AT5G61430.1	K	k:1077	conserved	Seed plants	conserved	Land plants
ath-miR164b-5p	AT5G61430.2	K	k:1083	conserved	Seed plants	conserved	Land plants
ath-miR164c-3p	AT3G01490.1	KL	k:794,l:86	conserved	Brassicaceae	conserved	Green plants
ath-miR164c-3p	AT3G01490.2	KL	k:688,l:86	conserved	Brassicaceae	conserved	Green plants
ath-miR164c-3p	AT4G17140.1	KL	k:1132,l:2	conserved	Brassicaceae	conserved	Green plants
ath-miR164c-3p	AT4G17140.2	KL	k:1107,l:2	conserved	Brassicaceae	conserved	Green plants
ath-miR164c-3p	AT4G17140.3	KL	k:1106,l:2	conserved	Brassicaceae	conserved	Green plants
ath-miR164c-3p	AT5G02750.1	G	g:19	conserved	Brassicaceae	conserved	Seed plants
ath-miR164c-5p	AT1G56010.1	K	k:373	conserved	Seed plants	conserved	Flowering plants	1	1706-1726~3
ath-miR164c-5p	AT1G56010.2	K	k:1104	conserved	Seed plants	conserved	Flowering plants	1	802-822~10
ath-miR164c-5p	AT2G47650.1	K	k:1000	conserved	Seed plants	conserved	Green plants
ath-miR164c-5p	AT2G47650.2	K	k:1040	conserved	Seed plants	conserved	Green plants
ath-miR164c-5p	AT3G12977.1	K	k:1013	conserved	Seed plants	conserved	Flowering plants
ath-miR164c-5p	AT3G12977.2	K	k:1046	conserved	Seed plants	conserved	Flowering plants
ath-miR164c-5p	AT3G15170.1	K	k:1131	conserved	Seed plants	conserved	Land plants	1	765-785~1
ath-miR164c-5p	AT3G62830.1	K	k:962	conserved	Seed plants	conserved	Green plants
ath-miR164c-5p	AT3G62830.2	K	k:1135	conserved	Seed plants	conserved	Green plants
ath-miR164c-5p	AT5G07680.1	K	k:1124	conserved	Seed plants	conserved	Land plants	1	923-943~4
ath-miR164c-5p	AT5G07680.2	K	k:1135	conserved	Seed plants	conserved	Land plants	1	651-671~5
ath-miR164c-5p	AT5G16040.1	K	k:864	conserved	Seed plants	conserved	Green plants
ath-miR164c-5p	AT5G16040.2	K	k:899	conserved	Seed plants	conserved	Green plants
ath-miR164c-5p	AT5G39610.1	K	k:633	conserved	Seed plants	conserved	Land plants
ath-miR164c-5p	AT5G53950.1	K	k:446	conserved	Seed plants	conserved	Land plants	1	832-852~4
ath-miR164c-5p	AT5G61430.1	K	k:1077	conserved	Seed plants	conserved	Land plants	1	866-886~3
ath-miR164c-5p	AT5G61430.2	K	k:1083	conserved	Seed plants	conserved	Land plants	1	970-990~4
ath-miR165a-3p	AT1G30490.1	K	k:885	conserved	Land plants	conserved	Green plants	1	927-947~6
ath-miR165a-3p	AT1G52150.1	K	k:1123	conserved	Land plants	conserved	Green plants
ath-miR165a-3p	AT1G52150.2	K	k:1068	conserved	Land plants	conserved	Green plants
ath-miR165a-3p	AT1G52150.3	K	k:1042	conserved	Land plants	conserved	Green plants
ath-miR165a-3p	AT2G34710.1	K	k:951	conserved	Land plants	conserved	Green plants	1	952-972~11
ath-miR165a-3p	AT4G32880.1	K	k:1088	conserved	Land plants	conserved	Green plants	1	959-979~5
ath-miR165a-3p	AT5G60690.1	K	k:668	conserved	Land plants	conserved	Green plants	1	1304-1324~5
ath-miR165b	AT1G30490.1	K	k:885	conserved	Land plants	conserved	Green plants	1	927-947~8
ath-miR165b	AT1G52150.1	K	k:1123	conserved	Land plants	conserved	Green plants
ath-miR165b	AT1G52150.2	K	k:1068	conserved	Land plants	conserved	Green plants
ath-miR165b	AT1G52150.3	K	k:1042	conserved	Land plants	conserved	Green plants
ath-miR165b	AT2G34710.1	K	k:951	conserved	Land plants	conserved	Green plants	1	952-972~4
ath-miR165b	AT4G32880.1	K	k:1088	conserved	Land plants	conserved	Green plants	1	959-979~4
ath-miR165b	AT5G60690.1	K	k:668	conserved	Land plants	conserved	Green plants	1	1304-1324~6
ath-miR166a-3p	AT1G30490.1	K	k:885	conserved	Land plants	conserved	Green plants
ath-miR166a-3p	AT1G52150.1	K	k:1123	conserved	Land plants	conserved	Green plants	1	551-571~7
ath-miR166a-3p	AT1G52150.2	K	k:1068	conserved	Land plants	conserved	Green plants	1	1268-1288~9
ath-miR166a-3p	AT1G52150.3	K	k:1042	conserved	Land plants	conserved	Green plants	1	1354-1374~4
ath-miR166a-3p	AT2G34710.1	K	k:951	conserved	Land plants	conserved	Green plants
ath-miR166a-3p	AT4G32880.1	K	k:1088	conserved	Land plants	conserved	Green plants
ath-miR166a-3p	AT5G60690.1	K	k:668	conserved	Land plants	conserved	Green plants
ath-miR166b-3p	AT1G30490.1	K	k:885	conserved	Land plants	conserved	Green plants
ath-miR166b-3p	AT1G52150.1	K	k:1123	conserved	Land plants	conserved	Green plants
ath-miR166b-3p	AT1G52150.2	K	k:1068	conserved	Land plants	conserved	Green plants
ath-miR166b-3p	AT1G52150.3	K	k:1042	conserved	Land plants	conserved	Green plants
ath-miR166b-3p	AT2G34710.1	K	k:951	conserved	Land plants	conserved	Green plants
ath-miR166b-3p	AT4G32880.1	K	k:1088	conserved	Land plants	conserved	Green plants
ath-miR166b-3p	AT5G60690.1	K	k:668	conserved	Land plants	conserved	Green plants
ath-miR166c	AT1G30490.1	K	k:885	conserved	Land plants	conserved	Green plants
ath-miR166c	AT1G52150.1	K	k:1123	conserved	Land plants	conserved	Green plants
ath-miR166c	AT1G52150.2	K	k:1068	conserved	Land plants	conserved	Green plants
ath-miR166c	AT1G52150.3	K	k:1042	conserved	Land plants	conserved	Green plants
ath-miR166c	AT2G34710.1	K	k:951	conserved	Land plants	conserved	Green plants
ath-miR166c	AT4G32880.1	K	k:1088	conserved	Land plants	conserved	Green plants
ath-miR166c	AT5G60690.1	K	k:668	conserved	Land plants	conserved	Green plants
ath-miR166d	AT1G30490.1	K	k:885	conserved	Land plants	conserved	Green plants
ath-miR166d	AT1G52150.1	K	k:1123	conserved	Land plants	conserved	Green plants
ath-miR166d	AT1G52150.2	K	k:1068	conserved	Land plants	conserved	Green plants
ath-miR166d	AT1G52150.3	K	k:1042	conserved	Land plants	conserved	Green plants
ath-miR166d	AT2G34710.1	K	k:951	conserved	Land plants	conserved	Green plants
ath-miR166d	AT4G32880.1	K	k:1088	conserved	Land plants	conserved	Green plants
ath-miR166d	AT5G60690.1	K	k:668	conserved	Land plants	conserved	Green plants
ath-miR166e-3p	AT1G30490.1	K	k:885	conserved	Land plants	conserved	Green plants
ath-miR166e-3p	AT1G52150.1	K	k:1123	conserved	Land plants	conserved	Green plants
ath-miR166e-3p	AT1G52150.2	K	k:1068	conserved	Land plants	conserved	Green plants
ath-miR166e-3p	AT1G52150.3	K	k:1042	conserved	Land plants	conserved	Green plants
ath-miR166e-3p	AT2G34710.1	K	k:951	conserved	Land plants	conserved	Green plants
ath-miR166e-3p	AT4G32880.1	K	k:1088	conserved	Land plants	conserved	Green plants
ath-miR166e-3p	AT5G60690.1	K	k:668	conserved	Land plants	conserved	Green plants
ath-miR166e-5p	AT5G04240.1	K	k:1092	conserved	Flowering plants	conserved	Land plants
ath-miR166e-5p	AT5G35670.1	KL	k:1080,l:9	conserved	Flowering plants	conserved	Flowering plants
ath-miR166e-5p	AT5G65970.1	K	k:464	conserved	Flowering plants	conserved	Green plants
ath-miR166e-5p	AT5G65970.2	K	k:480	conserved	Flowering plants	conserved	Green plants
ath-miR166f	AT1G30490.1	K	k:885	conserved	Land plants	conserved	Green plants
ath-miR166f	AT1G52150.1	K	k:1123	conserved	Land plants	conserved	Green plants
ath-miR166f	AT1G52150.2	K	k:1068	conserved	Land plants	conserved	Green plants
ath-miR166f	AT1G52150.3	K	k:1042	conserved	Land plants	conserved	Green plants
ath-miR166f	AT2G34710.1	K	k:951	conserved	Land plants	conserved	Green plants
ath-miR166f	AT4G32880.1	K	k:1088	conserved	Land plants	conserved	Green plants
ath-miR166f	AT5G60690.1	K	k:668	conserved	Land plants	conserved	Green plants
ath-miR166g	AT1G30490.1	K	k:885	conserved	Land plants	conserved	Green plants
ath-miR166g	AT1G52150.1	K	k:1123	conserved	Land plants	conserved	Green plants	1	551-571~8
ath-miR166g	AT1G52150.2	K	k:1068	conserved	Land plants	conserved	Green plants	1	1268-1288~6
ath-miR166g	AT1G52150.3	K	k:1042	conserved	Land plants	conserved	Green plants	1	1354-1374~11
ath-miR166g	AT2G34710.1	K	k:951	conserved	Land plants	conserved	Green plants
ath-miR166g	AT4G32880.1	K	k:1088	conserved	Land plants	conserved	Green plants
ath-miR166g	AT5G60690.1	K	k:668	conserved	Land plants	conserved	Green plants
ath-miR167a-3p	AT2G42170.2	K	k:914	conserved	Brassicaceae	conserved	Green plants
ath-miR167a-3p	AT3G28770.1	G	g:147	conserved	Brassicaceae	conserved	Rosids
ath-miR167a-3p	AT5G42920.1	G	g:1	conserved	Brassicaceae	conserved	Green plants
ath-miR167a-3p	AT5G42920.2	G	g:1	conserved	Brassicaceae	conserved	Green plants
ath-miR167a-5p	AT5G37020.1	K	k:700	conserved	Seed plants	conserved	Land plants
ath-miR167a-5p	AT5G37020.2	K	k:1006	conserved	Seed plants	conserved	Land plants
ath-miR167a-5p	AT5G37020.3	K	k:788	conserved	Seed plants	conserved	Land plants
ath-miR167b	AT5G37020.1	K	k:700	conserved	Seed plants	conserved	Land plants
ath-miR167b	AT5G37020.2	K	k:1006	conserved	Seed plants	conserved	Land plants
ath-miR167b	AT5G37020.3	K	k:788	conserved	Seed plants	conserved	Land plants
ath-miR167c-5p	AT1G30330.1	K	k:1003	conserved	Rosids	conserved	Land plants	1	3340-3360~4
ath-miR167c-5p	AT1G30330.2	K	k:988	conserved	Rosids	conserved	Land plants	1	3235-3255~2
ath-miR167c-5p	AT1G30330.3	K	k:999	conserved	Rosids	conserved	Land plants	1	3471-3491~2
ath-miR167c-5p	AT5G37020.1	K	k:700	conserved	Rosids	conserved	Land plants	1	2944-2964~3
ath-miR167c-5p	AT5G37020.2	K	k:1006	conserved	Rosids	conserved	Land plants
ath-miR167c-5p	AT5G37020.3	K	k:788	conserved	Rosids	conserved	Land plants	1	2897-2917~1
ath-miR168a-3p	AT5G17780.1	K	k:910	conserved	Flowering plants	conserved	Land plants
ath-miR168a-3p	AT5G17780.2	K	k:906	conserved	Flowering plants	conserved	Land plants
ath-miR168a-5p	AT1G48410.1	K	k:1109	conserved	Seed plants	conserved	Green plants	1	518-538~7
ath-miR168a-5p	AT1G48410.2	K	k:1100	conserved	Seed plants	conserved	Green plants	1	549-569~4
ath-miR168a-5p	AT1G48410.3	K	k:1109	conserved	Seed plants	conserved	Green plants	1	521-541~8
ath-miR168b-5p	AT1G48410.1	KL	k:1104,l:5	conserved	Seed plants	conserved	Green plants	1	518-538~4
ath-miR168b-5p	AT1G48410.2	KL	k:1095,l:5	conserved	Seed plants	conserved	Green plants	1	549-569~6
ath-miR168b-5p	AT1G48410.3	KL	k:1104,l:5	conserved	Seed plants	conserved	Green plants	1	521-541~4
ath-miR169a-3p	AT2G40840.1	K	k:1126	conserved	Flowering plants	conserved	Green plants
ath-miR169a-3p	AT5G11270.1	G	g:37	conserved	Flowering plants	conserved	Green plants
ath-miR169a-5p	AT1G17590.1	K	k:1016	conserved	Seed plants	conserved	Green plants	1	1319-1339~7
ath-miR169a-5p	AT1G17590.2	K	k:1041	conserved	Seed plants	conserved	Green plants	1	1237-1257~10
ath-miR169a-5p	AT1G17590.3	K	k:976	conserved	Seed plants	conserved	Green plants	1	1661-1681~9
ath-miR169a-5p	AT1G17590.4	K	k:1000	conserved	Seed plants	conserved	Green plants	1	1437-1457~10
ath-miR169a-5p	AT1G54160.1	K	k:1028	conserved	Seed plants	conserved	Green plants	1	1284-1304~10
ath-miR169a-5p	AT1G72830.1	K	k:239	conserved	Seed plants	conserved	Green plants
ath-miR169a-5p	AT1G72830.2	K	k:263	conserved	Seed plants	conserved	Green plants
ath-miR169a-5p	AT1G72830.3	K	k:257	conserved	Seed plants	conserved	Green plants
ath-miR169a-5p	AT3G09150.2	G	g:16	conserved	Seed plants	conserved	Green plants
ath-miR169a-5p	AT3G14020.1	K	k:975	conserved	Seed plants	conserved	Green plants
ath-miR169a-5p	AT3G14020.2	K	k:966	conserved	Seed plants	conserved	Green plants
ath-miR169a-5p	AT3G20910.1	K	k:1025	conserved	Seed plants	conserved	Green plants	1	1062-1082~8
ath-miR169a-5p	AT5G12840.1	K	k:133	conserved	Seed plants	conserved	Green plants
ath-miR169a-5p	AT5G12840.2	K	k:125	conserved	Seed plants	conserved	Green plants
ath-miR169a-5p	AT5G12840.4	K	k:134	conserved	Seed plants	conserved	Green plants
ath-miR169a-5p	AT5G12840.5	K	k:130	conserved	Seed plants	conserved	Green plants
ath-miR169a-5p	AT5G42120.1	KL	k:1069,l:35	conserved	Seed plants	conserved	Land plants
ath-miR169b-5p	AT1G17590.1	K	k:1016	conserved	Seed plants	conserved	Green plants
ath-miR169b-5p	AT1G17590.2	K	k:1041	conserved	Seed plants	conserved	Green plants
ath-miR169b-5p	AT1G17590.3	K	k:976	conserved	Seed plants	conserved	Green plants
ath-miR169b-5p	AT1G17590.4	K	k:1000	conserved	Seed plants	conserved	Green plants
ath-miR169b-5p	AT1G54160.1	K	k:1028	conserved	Seed plants	conserved	Green plants
ath-miR169b-5p	AT1G72830.1	K	k:239	conserved	Seed plants	conserved	Green plants
ath-miR169b-5p	AT1G72830.2	K	k:263	conserved	Seed plants	conserved	Green plants
ath-miR169b-5p	AT1G72830.3	K	k:257	conserved	Seed plants	conserved	Green plants
ath-miR169b-5p	AT3G05690.1	K	k:1107	conserved	Seed plants	conserved	Flowering plants
ath-miR169b-5p	AT3G05690.2	K	k:1099	conserved	Seed plants	conserved	Flowering plants
ath-miR169b-5p	AT3G14020.1	K	k:975	conserved	Seed plants	conserved	Green plants
ath-miR169b-5p	AT3G14020.2	K	k:966	conserved	Seed plants	conserved	Green plants
ath-miR169b-5p	AT3G20910.1	K	k:1025	conserved	Seed plants	conserved	Green plants
ath-miR169b-5p	AT5G06510.2	K	k:1124	conserved	Seed plants	conserved	Flowering plants
ath-miR169b-5p	AT5G06510.3	K	k:1115	conserved	Seed plants	conserved	Flowering plants
ath-miR169b-5p	AT5G06510.6	K	k:1124	conserved	Seed plants	conserved	Flowering plants
ath-miR169b-5p	AT5G12840.1	K	k:133	conserved	Seed plants	conserved	Green plants	1	1145-1165~3
ath-miR169b-5p	AT5G12840.2	K	k:125	conserved	Seed plants	conserved	Green plants	1	1212-1232~2
ath-miR169b-5p	AT5G12840.4	K	k:134	conserved	Seed plants	conserved	Green plants	1	1040-1060~5
ath-miR169b-5p	AT5G12840.5	K	k:130	conserved	Seed plants	conserved	Green plants	1	1035-1055~3
ath-miR169b-5p	AT5G42120.1	KL	k:1085,l:19	conserved	Seed plants	conserved	Land plants
ath-miR169c	AT1G17590.1	K	k:1016	conserved	Seed plants	conserved	Green plants
ath-miR169c	AT1G17590.2	K	k:1041	conserved	Seed plants	conserved	Green plants
ath-miR169c	AT1G17590.3	K	k:976	conserved	Seed plants	conserved	Green plants
ath-miR169c	AT1G17590.4	K	k:1000	conserved	Seed plants	conserved	Green plants
ath-miR169c	AT1G54160.1	K	k:1028	conserved	Seed plants	conserved	Green plants
ath-miR169c	AT1G72830.1	K	k:239	conserved	Seed plants	conserved	Green plants
ath-miR169c	AT1G72830.2	K	k:263	conserved	Seed plants	conserved	Green plants
ath-miR169c	AT1G72830.3	K	k:257	conserved	Seed plants	conserved	Green plants
ath-miR169c	AT3G05690.1	K	k:1107	conserved	Seed plants	conserved	Flowering plants
ath-miR169c	AT3G05690.2	K	k:1099	conserved	Seed plants	conserved	Flowering plants
ath-miR169c	AT3G14020.1	K	k:975	conserved	Seed plants	conserved	Green plants
ath-miR169c	AT3G14020.2	K	k:966	conserved	Seed plants	conserved	Green plants
ath-miR169c	AT3G20910.1	K	k:1025	conserved	Seed plants	conserved	Green plants
ath-miR169c	AT5G06510.2	K	k:1124	conserved	Seed plants	conserved	Flowering plants
ath-miR169c	AT5G06510.3	K	k:1115	conserved	Seed plants	conserved	Flowering plants
ath-miR169c	AT5G06510.6	K	k:1124	conserved	Seed plants	conserved	Flowering plants
ath-miR169c	AT5G12840.1	K	k:133	conserved	Seed plants	conserved	Green plants	1	1145-1165~7
ath-miR169c	AT5G12840.2	K	k:125	conserved	Seed plants	conserved	Green plants	1	1212-1232~7
ath-miR169c	AT5G12840.4	K	k:134	conserved	Seed plants	conserved	Green plants	1	1040-1060~3
ath-miR169c	AT5G12840.5	K	k:130	conserved	Seed plants	conserved	Green plants	1	1035-1055~5
ath-miR169c	AT5G42120.1	KL	k:1085,l:19	conserved	Seed plants	conserved	Land plants
ath-miR169d	AT1G54160.1	KL	k:1026,l:2	conserved	Flowering plants	conserved	Green plants	1	1285-1305~1
ath-miR169d	AT1G68560.1	KL	k:568,l:3	conserved	Flowering plants	conserved	Green plants
ath-miR169d	AT3G05690.1	K	k:1107	conserved	Flowering plants	conserved	Flowering plants	1	1313-1333~2
ath-miR169d	AT3G05690.2	K	k:1099	conserved	Flowering plants	conserved	Flowering plants	1	1512-1532~8
ath-miR169d	AT3G14020.1	KL	k:973,l:2	conserved	Flowering plants	conserved	Green plants
ath-miR169d	AT3G14020.2	KL	k:964,l:2	conserved	Flowering plants	conserved	Green plants	1	1272-1292~1
ath-miR169d	AT3G20910.1	KL	k:1023,l:2	conserved	Flowering plants	conserved	Green plants
ath-miR169d	AT5G06510.2	K	k:1124	conserved	Flowering plants	conserved	Flowering plants	1	1306-1326~2
ath-miR169d	AT5G06510.3	K	k:1115	conserved	Flowering plants	conserved	Flowering plants	1	1322-1342~1
ath-miR169d	AT5G06510.6	K	k:1124	conserved	Flowering plants	conserved	Flowering plants	1	1258-1278~3
ath-miR169d	AT5G12840.1	K	k:133	conserved	Flowering plants	conserved	Green plants
ath-miR169d	AT5G12840.2	K	k:125	conserved	Flowering plants	conserved	Green plants	1	1213-1233~1
ath-miR169d	AT5G12840.4	K	k:134	conserved	Flowering plants	conserved	Green plants
ath-miR169d	AT5G12840.5	K	k:130	conserved	Flowering plants	conserved	Green plants
ath-miR169e	AT1G54160.1	K	k:1028	conserved	Flowering plants	conserved	Green plants
ath-miR169e	AT1G68560.1	KL	k:568,l:3	conserved	Flowering plants	conserved	Green plants
ath-miR169e	AT3G05690.1	K	k:1107	conserved	Flowering plants	conserved	Flowering plants
ath-miR169e	AT3G05690.2	K	k:1099	conserved	Flowering plants	conserved	Flowering plants
ath-miR169e	AT3G14020.1	K	k:975	conserved	Flowering plants	conserved	Green plants
ath-miR169e	AT3G14020.2	K	k:966	conserved	Flowering plants	conserved	Green plants
ath-miR169e	AT3G20910.1	K	k:1025	conserved	Flowering plants	conserved	Green plants
ath-miR169e	AT5G06510.2	K	k:1124	conserved	Flowering plants	conserved	Flowering plants
ath-miR169e	AT5G06510.3	K	k:1115	conserved	Flowering plants	conserved	Flowering plants
ath-miR169e	AT5G06510.6	K	k:1124	conserved	Flowering plants	conserved	Flowering plants
ath-miR169e	AT5G12840.1	K	k:133	conserved	Flowering plants	conserved	Green plants
ath-miR169e	AT5G12840.2	K	k:125	conserved	Flowering plants	conserved	Green plants
ath-miR169e	AT5G12840.4	K	k:134	conserved	Flowering plants	conserved	Green plants
ath-miR169e	AT5G12840.5	K	k:130	conserved	Flowering plants	conserved	Green plants
ath-miR169f-3p	AT1G13470.1	KL	k:823,l:2	conserved	Brassicaceae	conserved	Seed plants
ath-miR169f-3p	AT5G43360.1	G	g:6	conserved	Brassicaceae	conserved	Green plants
ath-miR169f-5p	AT1G54160.1	K	k:1028	conserved	Flowering plants	conserved	Green plants
ath-miR169f-5p	AT1G68560.1	KL	k:568,l:3	conserved	Flowering plants	conserved	Green plants
ath-miR169f-5p	AT3G05690.1	K	k:1107	conserved	Flowering plants	conserved	Flowering plants
ath-miR169f-5p	AT3G05690.2	K	k:1099	conserved	Flowering plants	conserved	Flowering plants
ath-miR169f-5p	AT3G14020.1	K	k:975	conserved	Flowering plants	conserved	Green plants
ath-miR169f-5p	AT3G14020.2	K	k:966	conserved	Flowering plants	conserved	Green plants
ath-miR169f-5p	AT3G20910.1	K	k:1025	conserved	Flowering plants	conserved	Green plants
ath-miR169f-5p	AT5G06510.2	K	k:1124	conserved	Flowering plants	conserved	Flowering plants
ath-miR169f-5p	AT5G06510.3	K	k:1115	conserved	Flowering plants	conserved	Flowering plants
ath-miR169f-5p	AT5G06510.6	K	k:1124	conserved	Flowering plants	conserved	Flowering plants
ath-miR169f-5p	AT5G12840.1	K	k:133	conserved	Flowering plants	conserved	Green plants
ath-miR169f-5p	AT5G12840.2	K	k:125	conserved	Flowering plants	conserved	Green plants
ath-miR169f-5p	AT5G12840.4	K	k:134	conserved	Flowering plants	conserved	Green plants
ath-miR169f-5p	AT5G12840.5	K	k:130	conserved	Flowering plants	conserved	Green plants
ath-miR169g-5p	AT1G54160.1	KL	k:1026,l:2	conserved	Flowering plants	conserved	Green plants
ath-miR169g-5p	AT1G68560.1	KL	k:568,l:3	conserved	Flowering plants	conserved	Green plants
ath-miR169g-5p	AT3G05690.1	KL	k:1105,l:2	conserved	Flowering plants	conserved	Flowering plants	1	1313-1333~7
ath-miR169g-5p	AT3G05690.2	KL	k:1097,l:2	conserved	Flowering plants	conserved	Flowering plants	1	1512-1532~2
ath-miR169g-5p	AT3G14020.1	KL	k:973,l:2	conserved	Flowering plants	conserved	Green plants
ath-miR169g-5p	AT3G14020.2	KL	k:964,l:2	conserved	Flowering plants	conserved	Green plants	1	1272-1292~1
ath-miR169g-5p	AT3G20910.1	KL	k:1023,l:2	conserved	Flowering plants	conserved	Green plants
ath-miR169g-5p	AT5G06510.2	KL	k:1122,l:2	conserved	Flowering plants	conserved	Flowering plants	1	1306-1326~4
ath-miR169g-5p	AT5G06510.3	KL	k:1113,l:2	conserved	Flowering plants	conserved	Flowering plants	1	1322-1342~4
ath-miR169g-5p	AT5G06510.6	KL	k:1122,l:2	conserved	Flowering plants	conserved	Flowering plants	1	1258-1278~3
ath-miR169g-5p	AT5G12840.1	KL	k:132,l:1	conserved	Flowering plants	conserved	Green plants
ath-miR169g-5p	AT5G12840.2	KL	k:124,l:1	conserved	Flowering plants	conserved	Green plants
ath-miR169g-5p	AT5G12840.4	KL	k:133,l:1	conserved	Flowering plants	conserved	Green plants
ath-miR169g-5p	AT5G12840.5	KL	k:129,l:1	conserved	Flowering plants	conserved	Green plants
ath-miR169g-5p	AT5G42120.1	G	g:2	conserved	Flowering plants	conserved	Land plants
ath-miR169h	AT1G17590.1	K	k:1016	conserved	Seed plants	conserved	Green plants
ath-miR169h	AT1G17590.2	K	k:1041	conserved	Seed plants	conserved	Green plants
ath-miR169h	AT1G17590.3	K	k:976	conserved	Seed plants	conserved	Green plants
ath-miR169h	AT1G17590.4	K	k:1000	conserved	Seed plants	conserved	Green plants
ath-miR169h	AT1G54160.1	K	k:1028	conserved	Seed plants	conserved	Green plants
ath-miR169h	AT1G72830.1	K	k:239	conserved	Seed plants	conserved	Green plants	1	1741-1761~3
ath-miR169h	AT1G72830.2	K	k:263	conserved	Seed plants	conserved	Green plants	1	1326-1346~6
ath-miR169h	AT1G72830.3	K	k:257	conserved	Seed plants	conserved	Green plants	1	1371-1391~7
ath-miR169h	AT3G05690.1	K	k:1107	conserved	Seed plants	conserved	Flowering plants	1	1312-1332~6
ath-miR169h	AT3G05690.2	K	k:1099	conserved	Seed plants	conserved	Flowering plants	1	1511-1531~5
ath-miR169h	AT3G14020.1	K	k:975	conserved	Seed plants	conserved	Green plants	1	1624-1644~4
ath-miR169h	AT3G14020.2	K	k:966	conserved	Seed plants	conserved	Green plants	1	1271-1291~6
ath-miR169h	AT5G06510.2	K	k:1124	conserved	Seed plants	conserved	Flowering plants	1	1305-1325~5
ath-miR169h	AT5G06510.3	K	k:1115	conserved	Seed plants	conserved	Flowering plants	1	1321-1341~8
ath-miR169h	AT5G06510.6	K	k:1124	conserved	Seed plants	conserved	Flowering plants	1	1257-1277~4
ath-miR169h	AT5G12840.1	K	k:133	conserved	Seed plants	conserved	Green plants
ath-miR169h	AT5G12840.2	K	k:125	conserved	Seed plants	conserved	Green plants
ath-miR169h	AT5G12840.4	K	k:134	conserved	Seed plants	conserved	Green plants
ath-miR169h	AT5G12840.5	K	k:130	conserved	Seed plants	conserved	Green plants
ath-miR169i	AT1G17590.1	K	k:1013	conserved	Seed plants	conserved	Green plants
ath-miR169i	AT1G17590.2	K	k:1038	conserved	Seed plants	conserved	Green plants
ath-miR169i	AT1G17590.3	K	k:973	conserved	Seed plants	conserved	Green plants
ath-miR169i	AT1G17590.4	K	k:997	conserved	Seed plants	conserved	Green plants
ath-miR169i	AT1G54160.1	K	k:1025	conserved	Seed plants	conserved	Green plants
ath-miR169i	AT1G72830.1	K	k:239	conserved	Seed plants	conserved	Green plants
ath-miR169i	AT1G72830.2	K	k:263	conserved	Seed plants	conserved	Green plants
ath-miR169i	AT1G72830.3	K	k:257	conserved	Seed plants	conserved	Green plants
ath-miR169i	AT3G05690.1	K	k:1104	conserved	Seed plants	conserved	Flowering plants
ath-miR169i	AT3G05690.2	K	k:1096	conserved	Seed plants	conserved	Flowering plants
ath-miR169i	AT3G14020.1	K	k:972	conserved	Seed plants	conserved	Green plants
ath-miR169i	AT3G14020.2	K	k:963	conserved	Seed plants	conserved	Green plants
ath-miR169i	AT5G06510.2	K	k:1121	conserved	Seed plants	conserved	Flowering plants
ath-miR169i	AT5G06510.3	K	k:1112	conserved	Seed plants	conserved	Flowering plants
ath-miR169i	AT5G06510.6	K	k:1121	conserved	Seed plants	conserved	Flowering plants
ath-miR169i	AT5G12840.1	K	k:133	conserved	Seed plants	conserved	Green plants
ath-miR169i	AT5G12840.2	K	k:125	conserved	Seed plants	conserved	Green plants
ath-miR169i	AT5G12840.4	K	k:134	conserved	Seed plants	conserved	Green plants
ath-miR169i	AT5G12840.5	K	k:130	conserved	Seed plants	conserved	Green plants
ath-miR169j	AT1G17590.1	K	k:1016	conserved	Seed plants	conserved	Green plants
ath-miR169j	AT1G17590.2	K	k:1041	conserved	Seed plants	conserved	Green plants
ath-miR169j	AT1G17590.3	K	k:976	conserved	Seed plants	conserved	Green plants
ath-miR169j	AT1G17590.4	K	k:1000	conserved	Seed plants	conserved	Green plants
ath-miR169j	AT1G48500.1	G	g:276	conserved	Seed plants	conserved	Land plants
ath-miR169j	AT1G48500.2	G	g:277	conserved	Seed plants	conserved	Land plants
ath-miR169j	AT1G48500.3	G	g:243	conserved	Seed plants	conserved	Land plants
ath-miR169j	AT1G54160.1	K	k:1028	conserved	Seed plants	conserved	Green plants
ath-miR169j	AT1G72830.1	K	k:239	conserved	Seed plants	conserved	Green plants
ath-miR169j	AT1G72830.2	K	k:263	conserved	Seed plants	conserved	Green plants
ath-miR169j	AT1G72830.3	K	k:257	conserved	Seed plants	conserved	Green plants
ath-miR169j	AT3G05690.1	K	k:1107	conserved	Seed plants	conserved	Flowering plants
ath-miR169j	AT3G05690.2	K	k:1099	conserved	Seed plants	conserved	Flowering plants
ath-miR169j	AT3G14020.1	K	k:975	conserved	Seed plants	conserved	Green plants
ath-miR169j	AT3G14020.2	K	k:966	conserved	Seed plants	conserved	Green plants
ath-miR169j	AT5G06510.2	K	k:1124	conserved	Seed plants	conserved	Flowering plants
ath-miR169j	AT5G06510.3	K	k:1115	conserved	Seed plants	conserved	Flowering plants
ath-miR169j	AT5G06510.6	K	k:1124	conserved	Seed plants	conserved	Flowering plants
ath-miR169j	AT5G12840.1	KL	k:101,l:32	conserved	Seed plants	conserved	Green plants
ath-miR169j	AT5G12840.2	KL	k:97,l:28	conserved	Seed plants	conserved	Green plants
ath-miR169j	AT5G12840.4	KL	k:102,l:32	conserved	Seed plants	conserved	Green plants
ath-miR169j	AT5G12840.5	KL	k:101,l:29	conserved	Seed plants	conserved	Green plants
ath-miR169k	AT1G17590.1	K	k:1016	conserved	Seed plants	conserved	Green plants
ath-miR169k	AT1G17590.2	K	k:1041	conserved	Seed plants	conserved	Green plants
ath-miR169k	AT1G17590.3	K	k:976	conserved	Seed plants	conserved	Green plants
ath-miR169k	AT1G17590.4	K	k:1000	conserved	Seed plants	conserved	Green plants
ath-miR169k	AT1G54160.1	K	k:1028	conserved	Seed plants	conserved	Green plants
ath-miR169k	AT1G72830.1	K	k:239	conserved	Seed plants	conserved	Green plants
ath-miR169k	AT1G72830.2	K	k:263	conserved	Seed plants	conserved	Green plants
ath-miR169k	AT1G72830.3	K	k:257	conserved	Seed plants	conserved	Green plants
ath-miR169k	AT3G05690.1	K	k:1107	conserved	Seed plants	conserved	Flowering plants
ath-miR169k	AT3G05690.2	K	k:1099	conserved	Seed plants	conserved	Flowering plants
ath-miR169k	AT3G14020.1	K	k:975	conserved	Seed plants	conserved	Green plants
ath-miR169k	AT3G14020.2	K	k:966	conserved	Seed plants	conserved	Green plants
ath-miR169k	AT5G06510.2	K	k:1124	conserved	Seed plants	conserved	Flowering plants
ath-miR169k	AT5G06510.3	K	k:1115	conserved	Seed plants	conserved	Flowering plants
ath-miR169k	AT5G06510.6	K	k:1124	conserved	Seed plants	conserved	Flowering plants
ath-miR169k	AT5G12840.1	K	k:133	conserved	Seed plants	conserved	Green plants
ath-miR169k	AT5G12840.2	K	k:125	conserved	Seed plants	conserved	Green plants
ath-miR169k	AT5G12840.4	K	k:134	conserved	Seed plants	conserved	Green plants
ath-miR169k	AT5G12840.5	K	k:130	conserved	Seed plants	conserved	Green plants
ath-miR169l	AT1G17590.1	K	k:1016	conserved	Seed plants	conserved	Green plants
ath-miR169l	AT1G17590.2	K	k:1041	conserved	Seed plants	conserved	Green plants
ath-miR169l	AT1G17590.3	K	k:976	conserved	Seed plants	conserved	Green plants
ath-miR169l	AT1G17590.4	K	k:1000	conserved	Seed plants	conserved	Green plants
ath-miR169l	AT1G54160.1	K	k:1028	conserved	Seed plants	conserved	Green plants
ath-miR169l	AT1G72830.1	K	k:239	conserved	Seed plants	conserved	Green plants
ath-miR169l	AT1G72830.2	K	k:263	conserved	Seed plants	conserved	Green plants
ath-miR169l	AT1G72830.3	K	k:257	conserved	Seed plants	conserved	Green plants
ath-miR169l	AT3G05690.1	K	k:1107	conserved	Seed plants	conserved	Flowering plants
ath-miR169l	AT3G05690.2	K	k:1099	conserved	Seed plants	conserved	Flowering plants
ath-miR169l	AT3G14020.1	K	k:975	conserved	Seed plants	conserved	Green plants
ath-miR169l	AT3G14020.2	K	k:966	conserved	Seed plants	conserved	Green plants
ath-miR169l	AT5G06510.2	K	k:1124	conserved	Seed plants	conserved	Flowering plants
ath-miR169l	AT5G06510.3	K	k:1115	conserved	Seed plants	conserved	Flowering plants
ath-miR169l	AT5G06510.6	K	k:1124	conserved	Seed plants	conserved	Flowering plants
ath-miR169l	AT5G12840.1	K	k:133	conserved	Seed plants	conserved	Green plants
ath-miR169l	AT5G12840.2	K	k:125	conserved	Seed plants	conserved	Green plants
ath-miR169l	AT5G12840.4	K	k:134	conserved	Seed plants	conserved	Green plants
ath-miR169l	AT5G12840.5	K	k:130	conserved	Seed plants	conserved	Green plants
ath-miR169m	AT1G17590.1	K	k:1016	conserved	Seed plants	conserved	Green plants
ath-miR169m	AT1G17590.2	K	k:1041	conserved	Seed plants	conserved	Green plants
ath-miR169m	AT1G17590.3	K	k:976	conserved	Seed plants	conserved	Green plants
ath-miR169m	AT1G17590.4	K	k:1000	conserved	Seed plants	conserved	Green plants
ath-miR169m	AT1G54160.1	K	k:1028	conserved	Seed plants	conserved	Green plants
ath-miR169m	AT1G72830.1	K	k:239	conserved	Seed plants	conserved	Green plants
ath-miR169m	AT1G72830.2	K	k:263	conserved	Seed plants	conserved	Green plants
ath-miR169m	AT1G72830.3	K	k:257	conserved	Seed plants	conserved	Green plants
ath-miR169m	AT3G05690.1	K	k:1107	conserved	Seed plants	conserved	Flowering plants
ath-miR169m	AT3G05690.2	K	k:1099	conserved	Seed plants	conserved	Flowering plants
ath-miR169m	AT3G14020.1	K	k:975	conserved	Seed plants	conserved	Green plants
ath-miR169m	AT3G14020.2	K	k:966	conserved	Seed plants	conserved	Green plants
ath-miR169m	AT5G06510.2	K	k:1124	conserved	Seed plants	conserved	Flowering plants
ath-miR169m	AT5G06510.3	K	k:1115	conserved	Seed plants	conserved	Flowering plants
ath-miR169m	AT5G06510.6	K	k:1124	conserved	Seed plants	conserved	Flowering plants
ath-miR169m	AT5G12840.1	K	k:133	conserved	Seed plants	conserved	Green plants
ath-miR169m	AT5G12840.2	K	k:125	conserved	Seed plants	conserved	Green plants
ath-miR169m	AT5G12840.4	K	k:134	conserved	Seed plants	conserved	Green plants
ath-miR169m	AT5G12840.5	K	k:130	conserved	Seed plants	conserved	Green plants
ath-miR169n	AT1G17590.1	K	k:1016	conserved	Seed plants	conserved	Green plants
ath-miR169n	AT1G17590.2	K	k:1041	conserved	Seed plants	conserved	Green plants
ath-miR169n	AT1G17590.3	K	k:976	conserved	Seed plants	conserved	Green plants
ath-miR169n	AT1G17590.4	K	k:1000	conserved	Seed plants	conserved	Green plants
ath-miR169n	AT1G54160.1	K	k:1028	conserved	Seed plants	conserved	Green plants
ath-miR169n	AT1G72830.1	K	k:239	conserved	Seed plants	conserved	Green plants	1	1741-1761~7
ath-miR169n	AT1G72830.2	K	k:263	conserved	Seed plants	conserved	Green plants	1	1326-1346~4
ath-miR169n	AT1G72830.3	K	k:257	conserved	Seed plants	conserved	Green plants	1	1371-1391~3
ath-miR169n	AT3G05690.1	K	k:1107	conserved	Seed plants	conserved	Flowering plants	1	1312-1332~4
ath-miR169n	AT3G05690.2	K	k:1099	conserved	Seed plants	conserved	Flowering plants	1	1511-1531~5
ath-miR169n	AT3G07970.1	G	g:5	conserved	Seed plants	conserved	Land plants
ath-miR169n	AT3G14020.1	K	k:975	conserved	Seed plants	conserved	Green plants	1	1624-1644~5
ath-miR169n	AT3G14020.2	K	k:966	conserved	Seed plants	conserved	Green plants	1	1271-1291~1
ath-miR169n	AT5G06510.2	K	k:1124	conserved	Seed plants	conserved	Flowering plants	1	1305-1325~5
ath-miR169n	AT5G06510.3	K	k:1115	conserved	Seed plants	conserved	Flowering plants	1	1321-1341~2
ath-miR169n	AT5G06510.6	K	k:1124	conserved	Seed plants	conserved	Flowering plants	1	1257-1277~6
ath-miR169n	AT5G12840.1	KL	k:131,l:2	conserved	Seed plants	conserved	Green plants
ath-miR169n	AT5G12840.2	KL	k:123,l:2	conserved	Seed plants	conserved	Green plants
ath-miR169n	AT5G12840.4	KL	k:132,l:2	conserved	Seed plants	conserved	Green plants
ath-miR169n	AT5G12840.5	KL	k:128,l:2	conserved	Seed plants	conserved	Green plants
ath-miR169n	AT5G27550.1	G	g:3	conserved	Seed plants	conserved	Green plants
ath-miR169n	AT5G27550.2	G	g:3	conserved	Seed plants	conserved	Green plants
ath-miR170-3p	AT2G38195.2	G	g:1	conserved	Seed plants	conserved	Green plants
ath-miR170-3p	AT2G38220.1	G	g:1	conserved	Seed plants	conserved	Green plants
ath-miR170-3p	AT2G45160.1	K	k:982	conserved	Seed plants	conserved	Seed plants	1	1304-1324~9
ath-miR170-3p	AT3G04490.2	KL	k:573,l:69	conserved	Seed plants	conserved	Green plants
ath-miR170-3p	AT3G60630.1	K	k:993	conserved	Seed plants	conserved	Seed plants	1	1100-1120~8
ath-miR170-3p	AT3G61060.1	G	g:3	conserved	Seed plants	conserved	Green plants
ath-miR170-3p	AT3G61060.2	G	g:4	conserved	Seed plants	conserved	Green plants
ath-miR170-3p	AT4G00150.1	K	k:1111	conserved	Seed plants	conserved	Seed plants	1	1065-1085~5
ath-miR171a-3p	AT2G45160.1	K	k:987	conserved	Seed plants	conserved	Seed plants	1	1304-1324~7
ath-miR171a-3p	AT3G60630.1	K	k:997	conserved	Seed plants	conserved	Seed plants	1	1100-1120~5
ath-miR171a-3p	AT4G00150.1	K	k:1117	conserved	Seed plants	conserved	Seed plants	1	1065-1085~9
ath-miR171b-3p	AT2G45160.1	K	k:987	conserved	Land plants	conserved	Seed plants	1	1301-1321~6
ath-miR171b-3p	AT3G47170.1	KL	k:234,l:823	conserved	Land plants	conserved	Seed plants
ath-miR171b-3p	AT3G60630.1	K	k:997	conserved	Land plants	conserved	Seed plants	1	1097-1117~11
ath-miR171b-3p	AT4G00150.1	K	k:1117	conserved	Land plants	conserved	Seed plants	1	1062-1082~6
ath-miR171b-3p	AT5G23250.1	G	g:4	conserved	Land plants	conserved	Green plants
ath-miR171b-3p	AT5G23250.2	G	g:4	conserved	Land plants	conserved	Green plants
ath-miR171b-3p	AT5G23250.3	G	g:4	conserved	Land plants	conserved	Green plants
ath-miR171c-3p	AT2G45160.1	K	k:987	conserved	Land plants	conserved	Seed plants	1	1301-1321~9
ath-miR171c-3p	AT3G47170.1	KL	k:234,l:823	conserved	Land plants	conserved	Seed plants
ath-miR171c-3p	AT3G60630.1	K	k:997	conserved	Land plants	conserved	Seed plants	1	1097-1117~4
ath-miR171c-3p	AT4G00150.1	K	k:1117	conserved	Land plants	conserved	Seed plants	1	1062-1082~7
ath-miR171c-3p	AT5G23250.1	G	g:4	conserved	Land plants	conserved	Green plants
ath-miR171c-3p	AT5G23250.2	G	g:4	conserved	Land plants	conserved	Green plants
ath-miR171c-3p	AT5G23250.3	G	g:4	conserved	Land plants	conserved	Green plants
ath-miR171c-5p	AT4G08580.1	G	g:3	conserved	Flowering plants	conserved	Green plants
ath-miR171c-5p	AT4G21990.1	KL	k:1048,l:11	conserved	Flowering plants	conserved	Green plants
ath-miR171c-5p	AT4G21990.2	KL	k:1054,l:12	conserved	Flowering plants	conserved	Green plants
ath-miR172a	AT1G14440.1	K	k:923	conserved	Flowering plants	conserved	Green plants
ath-miR172a	AT1G14440.2	K	k:1119	conserved	Flowering plants	conserved	Green plants
ath-miR172a	AT1G61290.2	KL	k:361,l:30	conserved	Flowering plants	conserved	Green plants
ath-miR172a	AT2G28550.1	K	k:1135	conserved	Flowering plants	conserved	Green plants	1	1265-1285~6
ath-miR172a	AT2G28550.3	K	k:894	conserved	Flowering plants	conserved	Green plants	1	1310-1330~6
ath-miR172a	AT2G28550.4	K	k:883	conserved	Flowering plants	conserved	Green plants	1	1790-1810~5
ath-miR172a	AT2G28550.5	K	k:923	conserved	Flowering plants	conserved	Green plants	1	1671-1691~6
ath-miR172a	AT2G28550.6	K	k:1057	conserved	Flowering plants	conserved	Green plants	1	1780-1800~9
ath-miR172a	AT2G32770.2	K	k:1003	conserved	Flowering plants	conserved	Green plants
ath-miR172a	AT2G39250.1	K	k:1001	conserved	Flowering plants	conserved	Green plants
ath-miR172a	AT2G39250.2	K	k:1095	conserved	Flowering plants	conserved	Green plants
ath-miR172a	AT2G42380.1	G	g:3	conserved	Flowering plants	conserved	Land plants
ath-miR172a	AT2G42380.2	G	g:3	conserved	Flowering plants	conserved	Land plants
ath-miR172a	AT2G42380.3	G	g:2	conserved	Flowering plants	conserved	Land plants
ath-miR172a	AT2G42380.4	G	g:2	conserved	Flowering plants	conserved	Land plants
ath-miR172a	AT2G42380.5	G	g:3	conserved	Flowering plants	conserved	Land plants
ath-miR172a	AT3G47360.1	K	k:961	conserved	Flowering plants	conserved	Green plants
ath-miR172a	AT3G54990.1	K	k:1132	conserved	Flowering plants	conserved	Green plants
ath-miR172a	AT4G36920.1	K	k:1099	conserved	Flowering plants	conserved	Green plants
ath-miR172a	AT4G36920.2	K	k:1129	conserved	Flowering plants	conserved	Green plants
ath-miR172a	AT5G12900.1	KL	k:975,l:34	conserved	Flowering plants	conserved	Land plants
ath-miR172a	AT5G60120.1	K	k:671	conserved	Flowering plants	conserved	Green plants	1	1744-1764~10
ath-miR172a	AT5G60120.2	K	k:1133	conserved	Flowering plants	conserved	Green plants	1	1346-1366~11
ath-miR172a	AT5G60120.3	K	k:949	conserved	Flowering plants	conserved	Green plants	1	1355-1375~9
ath-miR172a	AT5G60120.4	K	k:1133	conserved	Flowering plants	conserved	Green plants	1	1538-1558~4
ath-miR172a	AT5G60120.5	K	k:1133	conserved	Flowering plants	conserved	Green plants	1	1480-1500~5
ath-miR172a	AT5G60120.6	K	k:973	conserved	Flowering plants	conserved	Green plants	1	1259-1279~6
ath-miR172a	AT5G65790.1	K	k:1095	conserved	Flowering plants	conserved	Land plants
ath-miR172a	AT5G67180.1	K	k:1022	conserved	Flowering plants	conserved	Green plants
ath-miR172b-3p	AT1G14440.1	K	k:923	conserved	Flowering plants	conserved	Green plants
ath-miR172b-3p	AT1G14440.2	K	k:1119	conserved	Flowering plants	conserved	Green plants
ath-miR172b-3p	AT1G61290.2	KL	k:361,l:30	conserved	Flowering plants	conserved	Green plants
ath-miR172b-3p	AT2G28550.1	K	k:1135	conserved	Flowering plants	conserved	Green plants	1	1265-1285~5
ath-miR172b-3p	AT2G28550.3	K	k:894	conserved	Flowering plants	conserved	Green plants	1	1310-1330~5
ath-miR172b-3p	AT2G28550.4	K	k:883	conserved	Flowering plants	conserved	Green plants	1	1790-1810~6
ath-miR172b-3p	AT2G28550.5	K	k:923	conserved	Flowering plants	conserved	Green plants	1	1671-1691~5
ath-miR172b-3p	AT2G28550.6	K	k:1057	conserved	Flowering plants	conserved	Green plants	1	1780-1800~2
ath-miR172b-3p	AT2G32770.2	K	k:1003	conserved	Flowering plants	conserved	Green plants
ath-miR172b-3p	AT2G39250.1	K	k:1001	conserved	Flowering plants	conserved	Green plants
ath-miR172b-3p	AT2G39250.2	K	k:1095	conserved	Flowering plants	conserved	Green plants
ath-miR172b-3p	AT2G42380.1	G	g:3	conserved	Flowering plants	conserved	Land plants
ath-miR172b-3p	AT2G42380.2	G	g:3	conserved	Flowering plants	conserved	Land plants
ath-miR172b-3p	AT2G42380.3	G	g:2	conserved	Flowering plants	conserved	Land plants
ath-miR172b-3p	AT2G42380.4	G	g:2	conserved	Flowering plants	conserved	Land plants
ath-miR172b-3p	AT2G42380.5	G	g:3	conserved	Flowering plants	conserved	Land plants
ath-miR172b-3p	AT3G47360.1	K	k:961	conserved	Flowering plants	conserved	Green plants
ath-miR172b-3p	AT3G54990.1	K	k:1132	conserved	Flowering plants	conserved	Green plants
ath-miR172b-3p	AT4G36920.1	K	k:1099	conserved	Flowering plants	conserved	Green plants
ath-miR172b-3p	AT4G36920.2	K	k:1129	conserved	Flowering plants	conserved	Green plants
ath-miR172b-3p	AT5G12900.1	KL	k:975,l:34	conserved	Flowering plants	conserved	Land plants
ath-miR172b-3p	AT5G60120.1	K	k:671	conserved	Flowering plants	conserved	Green plants	1	1744-1764~4
ath-miR172b-3p	AT5G60120.2	K	k:1133	conserved	Flowering plants	conserved	Green plants	1	1346-1366~3
ath-miR172b-3p	AT5G60120.3	K	k:949	conserved	Flowering plants	conserved	Green plants	1	1355-1375~5
ath-miR172b-3p	AT5G60120.4	K	k:1133	conserved	Flowering plants	conserved	Green plants	1	1538-1558~10
ath-miR172b-3p	AT5G60120.5	K	k:1133	conserved	Flowering plants	conserved	Green plants	1	1480-1500~9
ath-miR172b-3p	AT5G60120.6	K	k:973	conserved	Flowering plants	conserved	Green plants	1	1259-1279~9
ath-miR172b-3p	AT5G65790.1	K	k:1095	conserved	Flowering plants	conserved	Land plants
ath-miR172b-3p	AT5G67180.1	K	k:1022	conserved	Flowering plants	conserved	Green plants
ath-miR172b-5p	AT2G03820.1	KL	k:1086,l:33	conserved	Brassicaceae	conserved	Green plants	1	548-567~1
ath-miR172b-5p	AT2G16500.1	K	k:770	conserved	Brassicaceae	conserved	Green plants
ath-miR172b-5p	AT2G22950.1	K	k:681	conserved	Brassicaceae	conserved	Green plants
ath-miR172b-5p	AT3G57330.1	KL	k:733,l:322	conserved	Brassicaceae	conserved	Green plants
ath-miR172b-5p	AT3G57330.2	KL	k:672,l:19	conserved	Brassicaceae	conserved	Green plants
ath-miR172b-5p	AT4G10970.1	KL	k:560,l:13	conserved	Brassicaceae	conserved	Seed plants
ath-miR172b-5p	AT4G10970.2	KL	k:397,l:10	conserved	Brassicaceae	conserved	Seed plants
ath-miR172b-5p	AT4G10970.3	KL	k:541,l:13	conserved	Brassicaceae	conserved	Seed plants
ath-miR172b-5p	AT4G10970.4	KL	k:384,l:10	conserved	Brassicaceae	conserved	Seed plants
ath-miR172b-5p	AT4G10970.5	KL	k:753,l:13	conserved	Brassicaceae	conserved	Seed plants
ath-miR172b-5p	AT4G10970.6	KL	k:747,l:13	conserved	Brassicaceae	conserved	Seed plants
ath-miR172b-5p	AT4G10970.7	KL	k:393,l:10	conserved	Brassicaceae	conserved	Seed plants
ath-miR172b-5p	AT5G48410.1	KL	k:729,l:279	conserved	Brassicaceae	conserved	Seed plants
ath-miR172b-5p	AT5G48410.2	KL	k:645,l:75	conserved	Brassicaceae	conserved	Seed plants
ath-miR172b-5p	AT5G48410.3	KL	k:724,l:107	conserved	Brassicaceae	conserved	Seed plants
ath-miR172b-5p	AT5G48410.4	KL	k:726,l:279	conserved	Brassicaceae	conserved	Seed plants
ath-miR172b-5p	AT5G48830.1	KL	k:1080,l:8	conserved	Brassicaceae	conserved	Green plants
ath-miR172b-5p	AT5G48830.2	KL	k:1084,l:8	conserved	Brassicaceae	conserved	Green plants
ath-miR172c	AT1G11960.2	G	g:1	conserved	Flowering plants	conserved	Green plants
ath-miR172c	AT1G65690.1	G	g:14	conserved	Flowering plants	conserved	Green plants
ath-miR172c	AT2G28550.1	K	k:1135	conserved	Flowering plants	conserved	Green plants
ath-miR172c	AT2G28550.3	K	k:894	conserved	Flowering plants	conserved	Green plants
ath-miR172c	AT2G28550.4	K	k:883	conserved	Flowering plants	conserved	Green plants
ath-miR172c	AT2G28550.5	K	k:923	conserved	Flowering plants	conserved	Green plants
ath-miR172c	AT2G28550.6	K	k:1057	conserved	Flowering plants	conserved	Green plants
ath-miR172c	AT2G39250.1	K	k:1001	conserved	Flowering plants	conserved	Green plants
ath-miR172c	AT2G39250.2	K	k:1095	conserved	Flowering plants	conserved	Green plants
ath-miR172c	AT3G48185.1	KL	k:1025,l:6	conserved	Flowering plants	conserved	Brassicaceae
ath-miR172c	AT3G49690.1	KL	k:960,l:3	conserved	Flowering plants	conserved	Land plants
ath-miR172c	AT3G54990.1	K	k:1132	conserved	Flowering plants	conserved	Green plants
ath-miR172c	AT4G36920.1	K	k:1099	conserved	Flowering plants	conserved	Green plants	1	1452-1472~9
ath-miR172c	AT4G36920.2	K	k:1129	conserved	Flowering plants	conserved	Green plants	1	1293-1313~7
ath-miR172c	AT5G07190.2	K	k:1063	conserved	Flowering plants	conserved	Seed plants
ath-miR172c	AT5G60120.1	K	k:671	conserved	Flowering plants	conserved	Green plants
ath-miR172c	AT5G60120.2	K	k:1133	conserved	Flowering plants	conserved	Green plants
ath-miR172c	AT5G60120.3	K	k:949	conserved	Flowering plants	conserved	Green plants
ath-miR172c	AT5G60120.4	K	k:1133	conserved	Flowering plants	conserved	Green plants
ath-miR172c	AT5G60120.5	K	k:1133	conserved	Flowering plants	conserved	Green plants
ath-miR172c	AT5G60120.6	K	k:973	conserved	Flowering plants	conserved	Green plants
ath-miR172c	AT5G67180.1	K	k:1022	conserved	Flowering plants	conserved	Green plants
ath-miR172d-3p	AT1G11960.2	G	g:1	conserved	Flowering plants	conserved	Green plants
ath-miR172d-3p	AT1G65690.1	G	g:14	conserved	Flowering plants	conserved	Green plants
ath-miR172d-3p	AT2G28550.1	K	k:1135	conserved	Flowering plants	conserved	Green plants
ath-miR172d-3p	AT2G28550.3	K	k:894	conserved	Flowering plants	conserved	Green plants
ath-miR172d-3p	AT2G28550.4	K	k:883	conserved	Flowering plants	conserved	Green plants
ath-miR172d-3p	AT2G28550.5	K	k:923	conserved	Flowering plants	conserved	Green plants
ath-miR172d-3p	AT2G28550.6	K	k:1057	conserved	Flowering plants	conserved	Green plants
ath-miR172d-3p	AT2G39250.1	K	k:1001	conserved	Flowering plants	conserved	Green plants
ath-miR172d-3p	AT2G39250.2	K	k:1095	conserved	Flowering plants	conserved	Green plants
ath-miR172d-3p	AT3G48185.1	KL	k:1025,l:6	conserved	Flowering plants	conserved	Brassicaceae
ath-miR172d-3p	AT3G49690.1	KL	k:960,l:3	conserved	Flowering plants	conserved	Land plants
ath-miR172d-3p	AT3G54990.1	K	k:1132	conserved	Flowering plants	conserved	Green plants
ath-miR172d-3p	AT4G36920.1	K	k:1099	conserved	Flowering plants	conserved	Green plants	1	1452-1472~5
ath-miR172d-3p	AT4G36920.2	K	k:1129	conserved	Flowering plants	conserved	Green plants	1	1293-1313~7
ath-miR172d-3p	AT5G07190.2	K	k:1063	conserved	Flowering plants	conserved	Seed plants
ath-miR172d-3p	AT5G60120.1	K	k:671	conserved	Flowering plants	conserved	Green plants
ath-miR172d-3p	AT5G60120.2	K	k:1133	conserved	Flowering plants	conserved	Green plants
ath-miR172d-3p	AT5G60120.3	K	k:949	conserved	Flowering plants	conserved	Green plants
ath-miR172d-3p	AT5G60120.4	K	k:1133	conserved	Flowering plants	conserved	Green plants
ath-miR172d-3p	AT5G60120.5	K	k:1133	conserved	Flowering plants	conserved	Green plants
ath-miR172d-3p	AT5G60120.6	K	k:973	conserved	Flowering plants	conserved	Green plants
ath-miR172d-3p	AT5G67180.1	K	k:1022	conserved	Flowering plants	conserved	Green plants
ath-miR172d-5p	AT1G14810.1	K	k:1029	conserved	Brassicaceae	conserved	Green plants
ath-miR172d-5p	AT1G14810.2	K	k:1128	conserved	Brassicaceae	conserved	Green plants
ath-miR172d-5p	AT1G49015.1	K	k:1113	conserved	Brassicaceae	conserved	Green plants
ath-miR172d-5p	AT1G70780.1	K	k:846	conserved	Brassicaceae	conserved	Land plants
ath-miR172d-5p	AT2G15310.1	G	g:112	conserved	Brassicaceae	conserved	Green plants
ath-miR172d-5p	AT2G45680.1	K	k:1134	conserved	Brassicaceae	conserved	Green plants
ath-miR172d-5p	AT2G47430.1	KL	k:790,l:2	conserved	Brassicaceae	conserved	Green plants
ath-miR172d-5p	AT3G24830.1	G	g:16	conserved	Brassicaceae	conserved	Green plants
ath-miR172d-5p	AT3G56780.1	K	k:989	conserved	Brassicaceae	conserved	Flowering plants
ath-miR172d-5p	AT3G56780.2	K	k:978	conserved	Brassicaceae	conserved	Flowering plants
ath-miR172d-5p	AT3G56780.3	K	k:982	conserved	Brassicaceae	conserved	Flowering plants
ath-miR172d-5p	AT4G31850.1	KL	k:1124,l:7	conserved	Brassicaceae	conserved	Seed plants
ath-miR172e-3p	AT2G07750.1	G	g:112	conserved	Flowering plants	conserved	Green plants
ath-miR172e-3p	AT2G28550.1	K	k:1135	conserved	Flowering plants	conserved	Green plants
ath-miR172e-3p	AT2G28550.3	K	k:894	conserved	Flowering plants	conserved	Green plants
ath-miR172e-3p	AT2G28550.4	K	k:883	conserved	Flowering plants	conserved	Green plants
ath-miR172e-3p	AT2G28550.5	K	k:923	conserved	Flowering plants	conserved	Green plants
ath-miR172e-3p	AT2G28550.6	K	k:1057	conserved	Flowering plants	conserved	Green plants
ath-miR172e-3p	AT2G39250.1	K	k:1001	conserved	Flowering plants	conserved	Green plants	1	1147-1167~7
ath-miR172e-3p	AT2G39250.2	K	k:1095	conserved	Flowering plants	conserved	Green plants	1	1176-1196~5
ath-miR172e-3p	AT2G42380.1	KL	k:911,l:3	conserved	Flowering plants	conserved	Land plants
ath-miR172e-3p	AT2G42380.2	KL	k:730,l:3	conserved	Flowering plants	conserved	Land plants
ath-miR172e-3p	AT2G42380.3	KL	k:892,l:2	conserved	Flowering plants	conserved	Land plants
ath-miR172e-3p	AT2G42380.4	KL	k:892,l:2	conserved	Flowering plants	conserved	Land plants
ath-miR172e-3p	AT2G42380.5	KL	k:1078,l:3	conserved	Flowering plants	conserved	Land plants
ath-miR172e-3p	AT3G54990.1	K	k:1132	conserved	Flowering plants	conserved	Green plants	1	965-985~13
ath-miR172e-3p	AT4G36920.1	K	k:1099	conserved	Flowering plants	conserved	Green plants
ath-miR172e-3p	AT4G36920.2	K	k:1129	conserved	Flowering plants	conserved	Green plants
ath-miR172e-3p	AT5G36870.1	K	k:1100	conserved	Flowering plants	conserved	Green plants
ath-miR172e-3p	AT5G36870.2	K	k:1100	conserved	Flowering plants	conserved	Green plants
ath-miR172e-3p	AT5G36870.3	K	k:1100	conserved	Flowering plants	conserved	Green plants
ath-miR172e-3p	AT5G36870.4	K	k:1095	conserved	Flowering plants	conserved	Green plants
ath-miR172e-3p	AT5G36870.5	K	k:1100	conserved	Flowering plants	conserved	Green plants
ath-miR172e-3p	AT5G60120.1	K	k:671	conserved	Flowering plants	conserved	Green plants
ath-miR172e-3p	AT5G60120.2	K	k:1133	conserved	Flowering plants	conserved	Green plants
ath-miR172e-3p	AT5G60120.3	K	k:949	conserved	Flowering plants	conserved	Green plants
ath-miR172e-3p	AT5G60120.4	K	k:1133	conserved	Flowering plants	conserved	Green plants
ath-miR172e-3p	AT5G60120.5	K	k:1133	conserved	Flowering plants	conserved	Green plants
ath-miR172e-3p	AT5G60120.6	K	k:973	conserved	Flowering plants	conserved	Green plants
ath-miR172e-3p	AT5G65790.1	K	k:1095	conserved	Flowering plants	conserved	Land plants
ath-miR172e-3p	AT5G67180.1	K	k:1022	conserved	Flowering plants	conserved	Green plants
ath-miR172e-5p	AT2G03820.1	KL	k:1086,l:33	conserved	Brassicaceae	conserved	Green plants
ath-miR172e-5p	AT2G16500.1	K	k:770	conserved	Brassicaceae	conserved	Green plants
ath-miR172e-5p	AT2G22950.1	K	k:681	conserved	Brassicaceae	conserved	Green plants
ath-miR172e-5p	AT3G57330.1	KL	k:733,l:322	conserved	Brassicaceae	conserved	Green plants
ath-miR172e-5p	AT3G57330.2	KL	k:672,l:19	conserved	Brassicaceae	conserved	Green plants
ath-miR172e-5p	AT4G10970.1	KL	k:560,l:13	conserved	Brassicaceae	conserved	Seed plants
ath-miR172e-5p	AT4G10970.2	KL	k:397,l:10	conserved	Brassicaceae	conserved	Seed plants
ath-miR172e-5p	AT4G10970.3	KL	k:541,l:13	conserved	Brassicaceae	conserved	Seed plants
ath-miR172e-5p	AT4G10970.4	KL	k:384,l:10	conserved	Brassicaceae	conserved	Seed plants
ath-miR172e-5p	AT4G10970.5	KL	k:753,l:13	conserved	Brassicaceae	conserved	Seed plants
ath-miR172e-5p	AT4G10970.6	KL	k:747,l:13	conserved	Brassicaceae	conserved	Seed plants
ath-miR172e-5p	AT4G10970.7	KL	k:393,l:10	conserved	Brassicaceae	conserved	Seed plants
ath-miR172e-5p	AT5G48410.1	KL	k:729,l:279	conserved	Brassicaceae	conserved	Seed plants
ath-miR172e-5p	AT5G48410.2	KL	k:645,l:75	conserved	Brassicaceae	conserved	Seed plants
ath-miR172e-5p	AT5G48410.3	KL	k:724,l:107	conserved	Brassicaceae	conserved	Seed plants
ath-miR172e-5p	AT5G48410.4	KL	k:726,l:279	conserved	Brassicaceae	conserved	Seed plants
ath-miR172e-5p	AT5G48830.1	KL	k:1080,l:8	conserved	Brassicaceae	conserved	Green plants
ath-miR172e-5p	AT5G48830.2	KL	k:1084,l:8	conserved	Brassicaceae	conserved	Green plants
ath-miR173-3p	AT1G56500.1	G	g:100	non-conserved	Arabidopsis thaliana	conserved	Green plants
ath-miR173-3p	AT1G56500.2	G	g:100	non-conserved	Arabidopsis thaliana	conserved	Green plants
ath-miR173-3p	AT1G56500.3	G	g:120	non-conserved	Arabidopsis thaliana	conserved	Green plants
ath-miR173-3p	AT2G03350.1	G	g:5	non-conserved	Arabidopsis thaliana	conserved	Land plants
ath-miR173-3p	AT4G31560.1	K	k:968	non-conserved	Arabidopsis thaliana	conserved	Flowering plants	1	202-223~3
ath-miR173-3p	AT4G38960.1	KL	k:666,l:2	non-conserved	Arabidopsis thaliana	conserved	Green plants
ath-miR173-3p	AT4G38960.2	K	k:450	non-conserved	Arabidopsis thaliana	conserved	Green plants
ath-miR173-3p	AT4G38960.3	KL	k:480,l:1	non-conserved	Arabidopsis thaliana	conserved	Green plants
ath-miR173-3p	AT4G38960.4	KL	k:903,l:4	non-conserved	Arabidopsis thaliana	conserved	Green plants
ath-miR173-3p	AT4G38960.5	K	k:457	non-conserved	Arabidopsis thaliana	conserved	Green plants
ath-miR173-3p	AT4G38960.6	K	k:457	non-conserved	Arabidopsis thaliana	conserved	Green plants
ath-miR173-3p	AT5G59670.1	G	g:12	non-conserved	Arabidopsis thaliana	conserved	Green plants
ath-miR173-3p	AT5G59670.2	G	g:12	non-conserved	Arabidopsis thaliana	conserved	Green plants
ath-miR173-3p	AT5G61420.1	G	g:183	non-conserved	Arabidopsis thaliana	conserved	Green plants
ath-miR173-3p	AT5G61420.2	G	g:182	non-conserved	Arabidopsis thaliana	conserved	Green plants
ath-miR1886.1	AT1G56720.3	KL	k:767,l:192	non-conserved	Arabidopsis thaliana	conserved	Green plants
ath-miR1886.1	AT1G61210.1	K	k:261	non-conserved	Arabidopsis thaliana	conserved	Green plants
ath-miR1886.1	AT1G61210.2	K	k:246	non-conserved	Arabidopsis thaliana	conserved	Green plants
ath-miR1886.1	AT1G61210.3	K	k:246	non-conserved	Arabidopsis thaliana	conserved	Green plants
ath-miR1886.1	AT2G30690.1	G	g:466	non-conserved	Arabidopsis thaliana	conserved	Flowering plants
ath-miR1886.1	AT2G37160.4	K	k:1132	non-conserved	Arabidopsis thaliana	conserved	Green plants
ath-miR1886.1	AT2G47940.1	K	k:1090	non-conserved	Arabidopsis thaliana	conserved	Green plants	1	87-107~3
ath-miR1886.1	AT2G47940.2	K	k:1073	non-conserved	Arabidopsis thaliana	conserved	Green plants	1	37-57~4
ath-miR1886.1	AT3G04854.1	G	g:3	non-conserved	Arabidopsis thaliana	non-conserved	Arabidopsis thaliana
ath-miR1886.1	AT3G19310.1	K	k:1125	non-conserved	Arabidopsis thaliana	conserved	Green plants	1	1359-1379~3
ath-miR1886.1	AT4G02590.1	G	g:12	non-conserved	Arabidopsis thaliana	conserved	Green plants
ath-miR1886.1	AT4G02590.2	G	g:31	non-conserved	Arabidopsis thaliana	conserved	Green plants
ath-miR1886.1	AT4G02590.3	G	g:12	non-conserved	Arabidopsis thaliana	conserved	Green plants
ath-miR1886.1	AT4G17070.1	G	g:52	non-conserved	Arabidopsis thaliana	conserved	Green plants
ath-miR1886.1	AT4G18310.1	KL	k:1042,l:44	non-conserved	Arabidopsis thaliana	conserved	Brassicaceae
ath-miR1886.1	AT4G18320.2	K	k:1039	non-conserved	Arabidopsis thaliana	conserved	Brassicaceae
ath-miR1886.1	AT4G22400.1	K	k:1113	non-conserved	Arabidopsis thaliana	conserved	Brassicaceae
ath-miR1886.1	AT4G29000.1	K	k:1065	non-conserved	Arabidopsis thaliana	conserved	Green plants	1	2456-2476~1
ath-miR1886.1	AT5G03660.3	K	k:1048	non-conserved	Arabidopsis thaliana	conserved	Land plants
ath-miR1886.1	AT5G26030.1	G	g:2	non-conserved	Arabidopsis thaliana	conserved	Green plants
ath-miR1886.1	AT5G26030.2	G	g:2	non-conserved	Arabidopsis thaliana	conserved	Green plants
ath-miR1886.1	AT5G44000.1	G	g:18	non-conserved	Arabidopsis thaliana	conserved	Green plants
ath-miR1886.1	AT5G50110.1	G	g:2	non-conserved	Arabidopsis thaliana	conserved	Green plants
ath-miR1886.1	AT5G64580.1	KL	k:861,l:2	non-conserved	Arabidopsis thaliana	conserved	Green plants
ath-miR1886.1	AT5G64687.1	K	k:783	non-conserved	Arabidopsis thaliana	non-conserved	Arabidopsis thaliana
ath-miR1886.1	AT5G64687.2	K	k:554	non-conserved	Arabidopsis thaliana	non-conserved	Arabidopsis thaliana
ath-miR1886.1	AT5G65240.2	K	k:1044	non-conserved	Arabidopsis thaliana	conserved	Land plants
ath-miR1886.2	AT1G16480.1	G	g:929	non-conserved	Arabidopsis thaliana	conserved	Green plants
ath-miR1886.2	AT1G16480.2	G	g:929	non-conserved	Arabidopsis thaliana	conserved	Green plants
ath-miR1886.2	AT1G50990.1	G	g:8	non-conserved	Arabidopsis thaliana	conserved	Land plants
ath-miR1886.2	AT1G50990.2	G	g:6	non-conserved	Arabidopsis thaliana	conserved	Land plants
ath-miR1886.2	AT2G30690.1	KL	k:137,l:661	non-conserved	Arabidopsis thaliana	conserved	Flowering plants
ath-miR1886.2	AT2G30690.2	KL	k:137,l:662	non-conserved	Arabidopsis thaliana	conserved	Flowering plants
ath-miR1886.2	AT2G37160.4	K	k:1132	non-conserved	Arabidopsis thaliana	conserved	Green plants	1	1479-1499~4
ath-miR1886.2	AT2G38770.1	KL	k:26,l:106	non-conserved	Arabidopsis thaliana	conserved	Green plants
ath-miR1886.2	AT2G40840.1	G	g:1	non-conserved	Arabidopsis thaliana	conserved	Green plants
ath-miR1886.2	AT3G10800.1	KL	k:72,l:311	non-conserved	Arabidopsis thaliana	conserved	Green plants	1	515-535~1
ath-miR1886.2	AT4G33630.1	G	g:6	non-conserved	Arabidopsis thaliana	conserved	Green plants
ath-miR1886.2	AT4G33630.2	G	g:6	non-conserved	Arabidopsis thaliana	conserved	Green plants
ath-miR1886.2	AT4G33630.3	G	g:7	non-conserved	Arabidopsis thaliana	conserved	Green plants
ath-miR1886.2	AT5G24740.1	G	g:3	non-conserved	Arabidopsis thaliana	conserved	Green plants
ath-miR1886.2	AT5G24740.2	G	g:3	non-conserved	Arabidopsis thaliana	conserved	Green plants
ath-miR1886.2	AT5G24740.3	G	g:4	non-conserved	Arabidopsis thaliana	conserved	Green plants
ath-miR1886.2	AT5G24740.4	G	g:4	non-conserved	Arabidopsis thaliana	conserved	Green plants
ath-miR1886.2	AT5G24740.5	G	g:3	non-conserved	Arabidopsis thaliana	conserved	Green plants
ath-miR1886.2	AT5G24740.6	G	g:3	non-conserved	Arabidopsis thaliana	conserved	Green plants
ath-miR1886.2	AT5G53200.1	KL	k:1105,l:9	non-conserved	Arabidopsis thaliana	conserved	Seed plants
ath-miR1886.3	AT1G49260.1	G	g:6	non-conserved	Arabidopsis thaliana	conserved	Brassicaceae
ath-miR1886.3	AT1G63710.1	KL	k:984,l:123	non-conserved	Arabidopsis thaliana	conserved	Land plants
ath-miR1886.3	AT2G28550.2	G	g:12	non-conserved	Arabidopsis thaliana	conserved	Green plants
ath-miR1886.3	AT2G28550.6	G	g:12	non-conserved	Arabidopsis thaliana	conserved	Green plants
ath-miR1886.3	AT2G37160.4	K	k:1132	non-conserved	Arabidopsis thaliana	conserved	Green plants
ath-miR1886.3	AT2G38660.6	KL	k:303,l:114	non-conserved	Arabidopsis thaliana	conserved	Green plants
ath-miR1886.3	AT3G11880.3	K	k:1105	non-conserved	Arabidopsis thaliana	conserved	Green plants
ath-miR1886.3	AT3G28040.1	KL	k:357,l:49	non-conserved	Arabidopsis thaliana	conserved	Flowering plants
ath-miR1886.3	AT4G09720.5	G	g:7	non-conserved	Arabidopsis thaliana	conserved	Green plants
ath-miR1886.3	AT4G09720.6	G	g:9	non-conserved	Arabidopsis thaliana	conserved	Green plants
ath-miR1886.3	AT4G21240.1	KL	k:743,l:358	non-conserved	Arabidopsis thaliana	conserved	Eudicots
ath-miR1886.3	AT4G22840.1	G	g:6	non-conserved	Arabidopsis thaliana	conserved	Green plants
ath-miR1886.3	AT5G07970.1	KL	k:1125,l:2	non-conserved	Arabidopsis thaliana	conserved	Green plants
ath-miR1886.3	AT5G07970.2	KL	k:1074,l:2	non-conserved	Arabidopsis thaliana	conserved	Green plants
ath-miR1886.3	AT5G07970.3	KL	k:1123,l:2	non-conserved	Arabidopsis thaliana	conserved	Green plants
ath-miR1886.3	AT5G18180.1	K	k:1088	non-conserved	Arabidopsis thaliana	conserved	Green plants
ath-miR1887	AT5G44090.2	KL	k:323,l:6	non-conserved	Arabidopsis thaliana	conserved	Green plants
ath-miR1888a	AT1G18090.1	KL	k:1065,l:50	non-conserved	Arabidopsis thaliana	conserved	Green plants	1	1903-1923~2
ath-miR1888a	AT1G18670.2	KL	k:747,l:1	non-conserved	Arabidopsis thaliana	conserved	Flowering plants
ath-miR1888a	AT1G33720.2	KL	k:826,l:82	non-conserved	Arabidopsis thaliana	conserved	Land plants	1	518-537~1
ath-miR1888a	AT1G66820.1	G	g:2	non-conserved	Arabidopsis thaliana	conserved	Rosids
ath-miR1888a	AT2G25530.1	G	g:1	non-conserved	Arabidopsis thaliana	conserved	Green plants
ath-miR1888a	AT2G29790.1	G	g:234	non-conserved	Arabidopsis thaliana	conserved	Brassicaceae
ath-miR1888a	AT2G34930.1	G	g:3	non-conserved	Arabidopsis thaliana	conserved	Land plants
ath-miR1888a	AT5G08310.1	G	g:37	non-conserved	Arabidopsis thaliana	conserved	Vascular plants
ath-miR1888a	AT5G08310.2	G	g:42	non-conserved	Arabidopsis thaliana	conserved	Vascular plants
ath-miR1888a	AT5G17430.2	G	g:6	non-conserved	Arabidopsis thaliana	conserved	Green plants
ath-miR1888a	AT5G35210.2	G	g:4	non-conserved	Arabidopsis thaliana	conserved	Green plants
ath-miR1888b	AT1G06900.1	G	g:7	non-conserved	Arabidopsis thaliana	conserved	Green plants
ath-miR1888b	AT1G28650.1	G	g:84	non-conserved	Arabidopsis thaliana	conserved	Land plants
ath-miR1888b	AT1G66880.2	G	g:7	non-conserved	Arabidopsis thaliana	conserved	Land plants
ath-miR1888b	AT1G70280.1	G	g:3	non-conserved	Arabidopsis thaliana	conserved	Green plants
ath-miR1888b	AT1G70280.2	G	g:3	non-conserved	Arabidopsis thaliana	conserved	Green plants
ath-miR1888b	AT2G23220.1	G	g:10	non-conserved	Arabidopsis thaliana	conserved	Vascular plants
ath-miR1888b	AT3G19370.1	G	g:41	non-conserved	Arabidopsis thaliana	conserved	Land plants
ath-miR1888b	AT3G19370.3	G	g:41	non-conserved	Arabidopsis thaliana	conserved	Land plants
ath-miR1888b	AT3G54650.1	G	g:3	non-conserved	Arabidopsis thaliana	conserved	Green plants
ath-miR1888b	AT5G04550.1	G	g:79	non-conserved	Arabidopsis thaliana	conserved	Land plants
ath-miR1888b	AT5G04550.2	G	g:76	non-conserved	Arabidopsis thaliana	conserved	Land plants
ath-miR1888b	AT5G25350.1	G	g:4	non-conserved	Arabidopsis thaliana	conserved	Green plants
ath-miR1888b	AT5G49770.1	G	g:1	non-conserved	Arabidopsis thaliana	conserved	Green plants
ath-miR1888b	AT5G58970.1	G	g:6	non-conserved	Arabidopsis thaliana	conserved	Green plants
ath-miR1888b	AT5G58970.2	G	g:7	non-conserved	Arabidopsis thaliana	conserved	Green plants
ath-miR1888b	AT5G66730.1	G	g:38	non-conserved	Arabidopsis thaliana	conserved	Green plants
ath-miR2111a-5p	AT1G07010.1	K	k:1127	conserved	Seed plants	conserved	Green plants
ath-miR2111a-5p	AT1G07010.2	K	k:1135	conserved	Seed plants	conserved	Green plants
ath-miR2111a-5p	AT1G07010.3	K	k:1127	conserved	Seed plants	conserved	Green plants
ath-miR2111a-5p	AT2G23370.1	K	k:472	conserved	Seed plants	conserved	Green plants
ath-miR2111a-5p	AT2G23370.2	K	k:377	conserved	Seed plants	conserved	Green plants
ath-miR2111a-5p	AT2G41450.1	G	g:1	conserved	Seed plants	conserved	Land plants
ath-miR2111a-5p	AT2G41450.2	G	g:2	conserved	Seed plants	conserved	Land plants
ath-miR2111a-5p	AT2G43010.1	G	g:23	conserved	Seed plants	conserved	Green plants
ath-miR2111a-5p	AT2G43010.4	G	g:52	conserved	Seed plants	conserved	Green plants
ath-miR2111a-5p	AT2G43010.5	G	g:51	conserved	Seed plants	conserved	Green plants
ath-miR2111a-5p	AT3G27150.1	K	k:996	conserved	Seed plants	conserved	Land plants
ath-miR2111a-5p	AT3G27150.2	K	k:882	conserved	Seed plants	conserved	Land plants
ath-miR2111a-5p	AT5G52010.1	K	k:886	conserved	Seed plants	conserved	Green plants	1	1037-1057~1
ath-miR2111b-3p	AT1G11990.1	KL	k:991,l:12	conserved	Rosids	conserved	Green plants
ath-miR2111b-3p	AT1G11990.2	KL	k:1043,l:13	conserved	Rosids	conserved	Green plants
ath-miR2111b-3p	AT2G23380.1	KL	k:597,l:1	conserved	Rosids	conserved	Green plants
ath-miR2111b-3p	AT2G23380.2	KL	k:1121,l:1	conserved	Rosids	conserved	Green plants	1	914-935~1
ath-miR2111b-3p	AT3G27550.1	G	g:3	conserved	Rosids	conserved	Land plants
ath-miR2111b-3p	AT3G27550.2	G	g:3	conserved	Rosids	conserved	Land plants
ath-miR2111b-3p	AT3G27550.3	G	g:3	conserved	Rosids	conserved	Land plants
ath-miR2111b-5p	AT1G07010.1	K	k:1127	conserved	Seed plants	conserved	Green plants
ath-miR2111b-5p	AT1G07010.2	K	k:1135	conserved	Seed plants	conserved	Green plants
ath-miR2111b-5p	AT1G07010.3	K	k:1127	conserved	Seed plants	conserved	Green plants
ath-miR2111b-5p	AT2G23370.1	K	k:472	conserved	Seed plants	conserved	Green plants
ath-miR2111b-5p	AT2G23370.2	K	k:377	conserved	Seed plants	conserved	Green plants
ath-miR2111b-5p	AT2G41450.1	G	g:1	conserved	Seed plants	conserved	Land plants
ath-miR2111b-5p	AT2G41450.2	G	g:2	conserved	Seed plants	conserved	Land plants
ath-miR2111b-5p	AT2G43010.1	G	g:23	conserved	Seed plants	conserved	Green plants
ath-miR2111b-5p	AT2G43010.4	G	g:52	conserved	Seed plants	conserved	Green plants
ath-miR2111b-5p	AT2G43010.5	G	g:51	conserved	Seed plants	conserved	Green plants
ath-miR2111b-5p	AT3G27150.1	K	k:996	conserved	Seed plants	conserved	Land plants	1	324-344~1
ath-miR2111b-5p	AT3G27150.2	K	k:882	conserved	Seed plants	conserved	Land plants
ath-miR2111b-5p	AT5G52010.1	K	k:886	conserved	Seed plants	conserved	Green plants	1	1037-1057~3
ath-miR2112-3p	AT2G35450.1	K	k:1124	conserved	Brassicaceae	conserved	Green plants
ath-miR2112-3p	AT2G37340.1	K	k:1135	conserved	Brassicaceae	conserved	Green plants	1	117-136~1
ath-miR2112-3p	AT2G37340.2	K	k:1127	conserved	Brassicaceae	conserved	Green plants	1	3-22~1
ath-miR2112-3p	AT2G37340.3	K	k:1077	conserved	Brassicaceae	conserved	Green plants	1	410-429~1
ath-miR2112-3p	AT2G37340.4	K	k:1121	conserved	Brassicaceae	conserved	Green plants
ath-miR2112-3p	AT4G00760.1	K	k:1111	conserved	Brassicaceae	conserved	Rosids	1	2068-2088~4
ath-miR2112-3p	AT5G09730.1	K	k:855	conserved	Brassicaceae	conserved	Green plants
ath-miR2112-5p	AT1G55200.1	G	g:6	conserved	Brassicaceae	conserved	Land plants
ath-miR2112-5p	AT1G55200.2	G	g:6	conserved	Brassicaceae	conserved	Land plants
ath-miR2112-5p	AT1G55200.3	G	g:6	conserved	Brassicaceae	conserved	Land plants
ath-miR2112-5p	AT1G55200.4	G	g:6	conserved	Brassicaceae	conserved	Land plants
ath-miR2933a	AT1G67570.1	G	g:1	non-conserved	Arabidopsis thaliana	conserved	Green plants
ath-miR2933a	AT1G67570.2	G	g:1	non-conserved	Arabidopsis thaliana	conserved	Green plants
ath-miR2934-5p	AT1G22980.1	K	k:1033	non-conserved	Arabidopsis thaliana	conserved	Green plants
ath-miR2934-5p	AT1G22980.2	K	k:955	non-conserved	Arabidopsis thaliana	conserved	Green plants
ath-miR2934-5p	AT1G78340.1	K	k:1033	non-conserved	Arabidopsis thaliana	conserved	Green plants
ath-miR2934-5p	AT2G22740.1	K	k:1135	non-conserved	Arabidopsis thaliana	conserved	Green plants
ath-miR2934-5p	AT2G22740.2	K	k:1135	non-conserved	Arabidopsis thaliana	conserved	Green plants
ath-miR2934-5p	AT3G16230.1	K	k:910	non-conserved	Arabidopsis thaliana	conserved	Green plants
ath-miR2934-5p	AT3G16230.8	K	k:910	non-conserved	Arabidopsis thaliana	conserved	Green plants
ath-miR2934-5p	AT4G16250.1	K	k:802	non-conserved	Arabidopsis thaliana	conserved	Green plants
ath-miR2936	AT1G76710.1	K	k:1134	non-conserved	Arabidopsis thaliana	conserved	Green plants
ath-miR2936	AT1G76710.3	K	k:1132	non-conserved	Arabidopsis thaliana	conserved	Green plants
ath-miR2936	AT1G76710.4	K	k:1135	non-conserved	Arabidopsis thaliana	conserved	Green plants
ath-miR2936	AT1G76720.1	K	k:461	non-conserved	Arabidopsis thaliana	conserved	Green plants
ath-miR2936	AT2G39000.1	K	k:877	non-conserved	Arabidopsis thaliana	conserved	Green plants
ath-miR2936	AT2G39000.2	K	k:919	non-conserved	Arabidopsis thaliana	conserved	Green plants
ath-miR2936	AT2G39000.4	K	k:864	non-conserved	Arabidopsis thaliana	conserved	Green plants
ath-miR2936	AT3G49430.2	K	k:829	non-conserved	Arabidopsis thaliana	conserved	Green plants
ath-miR2936	AT3G52770.1	K	k:814	non-conserved	Arabidopsis thaliana	conserved	Flowering plants
ath-miR2936	AT3G53270.1	KL	k:855,l:83	non-conserved	Arabidopsis thaliana	conserved	Green plants
ath-miR2936	AT3G53270.2	KL	k:997,l:135	non-conserved	Arabidopsis thaliana	conserved	Green plants
ath-miR2936	AT3G53270.3	KL	k:909,l:108	non-conserved	Arabidopsis thaliana	conserved	Green plants
ath-miR2936	AT3G53270.5	KL	k:855,l:85	non-conserved	Arabidopsis thaliana	conserved	Green plants
ath-miR2936	AT3G53270.6	KL	k:998,l:137	non-conserved	Arabidopsis thaliana	conserved	Green plants
ath-miR2936	AT3G53270.7	KL	k:998,l:137	non-conserved	Arabidopsis thaliana	conserved	Green plants
ath-miR2936	AT3G53270.8	KL	k:829,l:79	non-conserved	Arabidopsis thaliana	conserved	Green plants
ath-miR2936	AT3G53270.9	KL	k:842,l:81	non-conserved	Arabidopsis thaliana	conserved	Green plants
ath-miR2936	AT4G04940.1	K	k:1124	non-conserved	Arabidopsis thaliana	conserved	Green plants
ath-miR2936	AT4G37580.1	G	g:5	non-conserved	Arabidopsis thaliana	conserved	Land plants
ath-miR2936	AT5G14170.1	KL	k:1079,l:50	non-conserved	Arabidopsis thaliana	conserved	Green plants	1	35-56~8
ath-miR2936	AT5G16340.1	G	g:30	non-conserved	Arabidopsis thaliana	conserved	Green plants
ath-miR2936	AT5G51450.1	K	k:1104	non-conserved	Arabidopsis thaliana	conserved	Green plants
ath-miR2936	AT5G51450.2	K	k:1104	non-conserved	Arabidopsis thaliana	conserved	Green plants
ath-miR2937	AT1G77145.1	K	k:957	non-conserved	Arabidopsis thaliana	conserved	Green plants
ath-miR2937	AT1G77145.2	K	k:921	non-conserved	Arabidopsis thaliana	conserved	Green plants
ath-miR2937	AT4G03100.1	KL	k:951,l:4	non-conserved	Arabidopsis thaliana	conserved	Land plants
ath-miR2937	AT5G11370.1	KL	k:1006,l:33	non-conserved	Arabidopsis thaliana	conserved	Flowering plants
ath-miR2937	AT5G38570.1	G	g:2	non-conserved	Arabidopsis thaliana	conserved	Flowering plants
ath-miR2938	AT4G08870.1	K	k:1000	non-conserved	Arabidopsis thaliana	conserved	Green plants	1	908-929~2
ath-miR2938	AT4G08870.2	K	k:970	non-conserved	Arabidopsis thaliana	conserved	Green plants
ath-miR2938	AT4G08900.1	KL	k:1001,l:2	non-conserved	Arabidopsis thaliana	conserved	Green plants	1	915-936~1
ath-miR2938	AT4G11900.1	G	g:106	non-conserved	Arabidopsis thaliana	conserved	Seed plants
ath-miR2938	AT4G11900.10	G	g:253	non-conserved	Arabidopsis thaliana	conserved	Seed plants
ath-miR2938	AT4G11900.2	G	g:178	non-conserved	Arabidopsis thaliana	conserved	Seed plants
ath-miR2938	AT4G11900.3	G	g:58	non-conserved	Arabidopsis thaliana	conserved	Seed plants
ath-miR2938	AT4G11900.4	G	g:190	non-conserved	Arabidopsis thaliana	conserved	Seed plants
ath-miR2938	AT4G11900.5	G	g:246	non-conserved	Arabidopsis thaliana	conserved	Seed plants
ath-miR2938	AT4G11900.6	G	g:232	non-conserved	Arabidopsis thaliana	conserved	Seed plants
ath-miR2938	AT4G11900.7	G	g:79	non-conserved	Arabidopsis thaliana	conserved	Seed plants
ath-miR2938	AT4G11900.8	G	g:102	non-conserved	Arabidopsis thaliana	conserved	Seed plants
ath-miR2938	AT4G11900.9	G	g:180	non-conserved	Arabidopsis thaliana	conserved	Seed plants
ath-miR2938	AT5G01110.1	K	k:719	non-conserved	Arabidopsis thaliana	conserved	Seed plants
ath-miR2938	AT5G01110.2	K	k:820	non-conserved	Arabidopsis thaliana	conserved	Seed plants
ath-miR2938	AT5G52810.1	K	k:733	non-conserved	Arabidopsis thaliana	conserved	Green plants	1	714-734~5
ath-miR2939	AT1G09240.1	KL	k:253,l:15	non-conserved	Arabidopsis thaliana	conserved	Land plants
ath-miR2939	AT3G19890.1	K	k:1119	non-conserved	Arabidopsis thaliana	conserved	Rosids	1	311-331~3
ath-miR2939	AT5G64150.1	G	g:2	non-conserved	Arabidopsis thaliana	conserved	Green plants
ath-miR319a	AT2G26950.1	K	k:1131	conserved	Land plants	conserved	Green plants
ath-miR319b	AT2G26950.1	K	k:1131	conserved	Land plants	conserved	Green plants
ath-miR319c	AT1G09960.1	K	k:497	conserved	Land plants	conserved	Green plants
ath-miR319c	AT2G26950.1	K	k:1131	conserved	Land plants	conserved	Green plants
ath-miR319c	AT2G31070.1	K	k:963	conserved	Land plants	conserved	Green plants	1	1413-1433~10
ath-miR319c	AT3G11440.1	K	k:382	conserved	Land plants	conserved	Green plants
ath-miR319c	AT3G11440.2	K	k:557	conserved	Land plants	conserved	Green plants
ath-miR319c	AT3G11440.3	K	k:557	conserved	Land plants	conserved	Green plants
ath-miR319c	AT3G11440.4	K	k:557	conserved	Land plants	conserved	Green plants
ath-miR319c	AT3G15030.1	K	k:928	conserved	Land plants	conserved	Green plants	1	1620-1640~12
ath-miR319c	AT3G15030.2	K	k:1028	conserved	Land plants	conserved	Green plants	1	1476-1496~12
ath-miR319c	AT3G15030.3	K	k:1072	conserved	Land plants	conserved	Green plants	1	1204-1224~12
ath-miR319c	AT3G15030.4	K	k:1119	conserved	Land plants	conserved	Green plants	1	993-1013~12
ath-miR319c	AT3G66658.1	K	k:418	conserved	Land plants	conserved	Green plants	1	1087-1107~3
ath-miR319c	AT3G66658.2	K	k:415	conserved	Land plants	conserved	Green plants	1	1200-1220~1
ath-miR319c	AT5G06100.1	K	k:1135	conserved	Land plants	conserved	Green plants
ath-miR319c	AT5G06100.2	K	k:1020	conserved	Land plants	conserved	Green plants
ath-miR319c	AT5G06100.3	K	k:1027	conserved	Land plants	conserved	Green plants
ath-miR319c	AT5G06100.4	K	k:1027	conserved	Land plants	conserved	Green plants
ath-miR319c	AT5G06100.5	K	k:1058	conserved	Land plants	conserved	Green plants
ath-miR3434-3p	AT2G42910.1	KL	k:882,l:101	non-conserved	Arabidopsis thaliana	conserved	Green plants	1	1135-1153~3
ath-miR3434-3p	AT4G19500.1	G	g:4	non-conserved	Arabidopsis thaliana	conserved	Rosids
ath-miR3434-3p	AT4G19500.2	G	g:4	non-conserved	Arabidopsis thaliana	conserved	Rosids
ath-miR3434-3p	AT5G55590.1	G	g:3	non-conserved	Arabidopsis thaliana	conserved	Green plants
ath-miR3434-5p	AT1G37130.1	G	g:3	non-conserved	Arabidopsis thaliana	conserved	Green plants
ath-miR3434-5p	AT1G66270.1	KL	k:924,l:4	non-conserved	Arabidopsis thaliana	conserved	Rosids
ath-miR3434-5p	AT1G66270.2	KL	k:1006,l:4	non-conserved	Arabidopsis thaliana	conserved	Rosids
ath-miR3434-5p	AT1G66280.1	KL	k:948,l:4	non-conserved	Arabidopsis thaliana	conserved	Rosids
ath-miR3434-5p	AT2G19870.1	KL	k:454,l:4	non-conserved	Arabidopsis thaliana	conserved	Green plants	1	778-797~1
ath-miR3434-5p	AT3G04820.1	K	k:1135	non-conserved	Arabidopsis thaliana	conserved	Green plants
ath-miR3434-5p	AT3G23870.1	K	k:872	non-conserved	Arabidopsis thaliana	conserved	Green plants
ath-miR3434-5p	AT3G23870.2	K	k:1125	non-conserved	Arabidopsis thaliana	conserved	Green plants
ath-miR3434-5p	AT3G23870.3	K	k:1068	non-conserved	Arabidopsis thaliana	conserved	Green plants
ath-miR3434-5p	AT3G23870.4	K	k:777	non-conserved	Arabidopsis thaliana	conserved	Green plants
ath-miR3434-5p	AT3G23870.5	K	k:1125	non-conserved	Arabidopsis thaliana	conserved	Green plants	1	191-210~1
ath-miR3434-5p	AT3G26220.1	G	g:3	non-conserved	Arabidopsis thaliana	conserved	Flowering plants
ath-miR3434-5p	AT3G28360.1	G	g:2	non-conserved	Arabidopsis thaliana	conserved	Green plants
ath-miR3434-5p	AT3G47490.2	K	k:811	non-conserved	Arabidopsis thaliana	conserved	Green plants
ath-miR3434-5p	AT4G09340.1	G	g:2	non-conserved	Arabidopsis thaliana	conserved	Green plants
ath-miR3434-5p	AT4G30935.1	G	g:4	non-conserved	Arabidopsis thaliana	conserved	Eudicots
ath-miR3434-5p	AT5G25370.1	KL	k:514,l:2	non-conserved	Arabidopsis thaliana	conserved	Green plants
ath-miR3434-5p	AT5G25370.2	K	k:305	non-conserved	Arabidopsis thaliana	conserved	Green plants
ath-miR3434-5p	AT5G25370.3	K	k:361	non-conserved	Arabidopsis thaliana	conserved	Green plants
ath-miR3434-5p	AT5G25370.4	KL	k:791,l:3	non-conserved	Arabidopsis thaliana	conserved	Green plants
ath-miR3434-5p	AT5G44800.1	KL	k:442,l:10	non-conserved	Arabidopsis thaliana	conserved	Green plants
ath-miR3440b-3p	AT1G43640.1	G	g:12	non-conserved	Arabidopsis thaliana	conserved	Green plants
ath-miR3440b-3p	AT1G43640.2	G	g:12	non-conserved	Arabidopsis thaliana	conserved	Green plants
ath-miR3440b-3p	AT1G49750.1	G	g:5	non-conserved	Arabidopsis thaliana	conserved	Green plants
ath-miR3440b-3p	AT1G52060.1	G	g:30	non-conserved	Arabidopsis thaliana	conserved	Rosids
ath-miR3440b-3p	AT1G60460.1	G	g:4	non-conserved	Arabidopsis thaliana	conserved	Green plants
ath-miR3440b-3p	AT1G60460.2	G	g:5	non-conserved	Arabidopsis thaliana	conserved	Green plants
ath-miR3440b-3p	AT1G60460.3	G	g:3	non-conserved	Arabidopsis thaliana	conserved	Green plants
ath-miR3440b-3p	AT1G65290.1	G	g:8	non-conserved	Arabidopsis thaliana	conserved	Green plants
ath-miR3440b-3p	AT1G70620.1	G	g:29	non-conserved	Arabidopsis thaliana	conserved	Land plants
ath-miR3440b-3p	AT1G70620.3	G	g:24	non-conserved	Arabidopsis thaliana	conserved	Land plants
ath-miR3440b-3p	AT1G70620.4	G	g:24	non-conserved	Arabidopsis thaliana	conserved	Land plants
ath-miR3440b-3p	AT1G70620.5	G	g:24	non-conserved	Arabidopsis thaliana	conserved	Land plants
ath-miR3440b-3p	AT1G70620.6	G	g:29	non-conserved	Arabidopsis thaliana	conserved	Land plants
ath-miR3440b-3p	AT1G70620.8	G	g:29	non-conserved	Arabidopsis thaliana	conserved	Land plants
ath-miR3440b-3p	AT1G70620.9	G	g:29	non-conserved	Arabidopsis thaliana	conserved	Land plants
ath-miR3440b-3p	AT2G03450.1	G	g:2	non-conserved	Arabidopsis thaliana	conserved	Green plants
ath-miR3440b-3p	AT2G05180.1	G	g:29	non-conserved	Arabidopsis thaliana	conserved	Land plants
ath-miR3440b-3p	AT2G22620.1	G	g:30	non-conserved	Arabidopsis thaliana	conserved	Green plants
ath-miR3440b-3p	AT2G22620.2	G	g:27	non-conserved	Arabidopsis thaliana	conserved	Green plants
ath-miR3440b-3p	AT2G22620.3	G	g:30	non-conserved	Arabidopsis thaliana	conserved	Green plants
ath-miR3440b-3p	AT2G22620.4	G	g:30	non-conserved	Arabidopsis thaliana	conserved	Green plants
ath-miR3440b-3p	AT2G22620.5	G	g:30	non-conserved	Arabidopsis thaliana	conserved	Green plants
ath-miR3440b-3p	AT2G41290.1	G	g:9	non-conserved	Arabidopsis thaliana	conserved	Green plants
ath-miR3440b-3p	AT3G04510.1	KL	k:718,l:221	non-conserved	Arabidopsis thaliana	conserved	Green plants
ath-miR3440b-3p	AT3G17360.1	G	g:12	non-conserved	Arabidopsis thaliana	conserved	Green plants
ath-miR3440b-3p	AT3G17360.2	G	g:11	non-conserved	Arabidopsis thaliana	conserved	Green plants
ath-miR3440b-3p	AT3G17360.3	G	g:11	non-conserved	Arabidopsis thaliana	conserved	Green plants
ath-miR3440b-3p	AT3G19960.1	G	g:37	non-conserved	Arabidopsis thaliana	conserved	Green plants
ath-miR3440b-3p	AT3G19960.2	G	g:36	non-conserved	Arabidopsis thaliana	conserved	Green plants
ath-miR3440b-3p	AT3G19960.3	G	g:37	non-conserved	Arabidopsis thaliana	conserved	Green plants
ath-miR3440b-3p	AT3G19960.4	G	g:51	non-conserved	Arabidopsis thaliana	conserved	Green plants
ath-miR3440b-3p	AT3G19960.5	G	g:37	non-conserved	Arabidopsis thaliana	conserved	Green plants
ath-miR3440b-3p	AT3G48290.2	G	g:2	non-conserved	Arabidopsis thaliana	conserved	Flowering plants
ath-miR3440b-3p	AT4G02420.1	KL	k:571,l:26	non-conserved	Arabidopsis thaliana	conserved	Land plants
ath-miR3440b-3p	AT4G12060.1	G	g:12	non-conserved	Arabidopsis thaliana	conserved	Green plants
ath-miR3440b-3p	AT4G17340.1	KL	k:290,l:15	non-conserved	Arabidopsis thaliana	conserved	Green plants	1	1119-1139~1
ath-miR3440b-3p	AT5G10745.2	G	g:2	non-conserved	Arabidopsis thaliana	conserved	Land plants
ath-miR3440b-3p	AT5G22510.1	G	g:4	non-conserved	Arabidopsis thaliana	conserved	Land plants
ath-miR3440b-3p	AT5G22510.2	G	g:6	non-conserved	Arabidopsis thaliana	conserved	Land plants
ath-miR3440b-3p	AT5G63970.1	G	g:13	non-conserved	Arabidopsis thaliana	conserved	Green plants
ath-miR3440b-3p	AT5G63970.2	G	g:13	non-conserved	Arabidopsis thaliana	conserved	Green plants
ath-miR3440b-5p	AT2G30990.1	G	g:9	non-conserved	Arabidopsis thaliana	conserved	Land plants
ath-miR3440b-5p	AT2G30990.2	G	g:8	non-conserved	Arabidopsis thaliana	conserved	Land plants
ath-miR3440b-5p	AT2G45920.1	G	g:8	non-conserved	Arabidopsis thaliana	conserved	Green plants
ath-miR3440b-5p	AT2G45920.2	G	g:8	non-conserved	Arabidopsis thaliana	conserved	Green plants
ath-miR3440b-5p	AT3G12930.1	G	g:6	non-conserved	Arabidopsis thaliana	conserved	Green plants
ath-miR3440b-5p	AT3G17510.1	G	g:8	non-conserved	Arabidopsis thaliana	conserved	Land plants
ath-miR3440b-5p	AT3G17510.2	G	g:4	non-conserved	Arabidopsis thaliana	conserved	Land plants
ath-miR3440b-5p	AT3G28660.1	G	g:285	non-conserved	Arabidopsis thaliana	conserved	Flowering plants
ath-miR3440b-5p	AT4G17243.1	KL	k:437,l:10	non-conserved	Arabidopsis thaliana	non-conserved	Arabidopsis thaliana
ath-miR3440b-5p	AT4G25020.1	G	g:8	non-conserved	Arabidopsis thaliana	conserved	Green plants
ath-miR3440b-5p	AT5G08490.1	KL	k:182,l:4	non-conserved	Arabidopsis thaliana	conserved	Green plants
ath-miR3440b-5p	AT5G08490.2	KL	k:182,l:4	non-conserved	Arabidopsis thaliana	conserved	Green plants
ath-miR3440b-5p	AT5G08490.3	KL	k:729,l:12	non-conserved	Arabidopsis thaliana	conserved	Green plants
ath-miR3440b-5p	AT5G08490.4	KL	k:751,l:13	non-conserved	Arabidopsis thaliana	conserved	Green plants
ath-miR3440b-5p	AT5G08490.7	KL	k:182,l:4	non-conserved	Arabidopsis thaliana	conserved	Green plants
ath-miR3440b-5p	AT5G08490.8	KL	k:749,l:13	non-conserved	Arabidopsis thaliana	conserved	Green plants
ath-miR3440b-5p	AT5G08695.1	KL	k:610,l:13	non-conserved	Arabidopsis thaliana	conserved	Green plants
ath-miR3440b-5p	AT5G26580.1	G	g:5	non-conserved	Arabidopsis thaliana	conserved	Land plants
ath-miR3440b-5p	AT5G36210.1	G	g:1	non-conserved	Arabidopsis thaliana	conserved	Green plants
ath-miR3440b-5p	AT5G66620.1	G	g:9	non-conserved	Arabidopsis thaliana	conserved	Green plants
ath-miR3440b-5p	AT5G66620.2	G	g:9	non-conserved	Arabidopsis thaliana	conserved	Green plants
ath-miR3440b-5p	AT5G66620.3	G	g:9	non-conserved	Arabidopsis thaliana	conserved	Green plants
ath-miR3440b-5p	AT5G66620.4	G	g:9	non-conserved	Arabidopsis thaliana	conserved	Green plants
ath-miR390a-3p	AT2G11851.1	G	g:2	conserved	Eudicots	non-conserved	Arabidopsis thaliana
ath-miR390a-3p	AT3G62190.1	G	g:376	conserved	Eudicots	conserved	Green plants
ath-miR390a-3p	AT3G62190.2	G	g:126	conserved	Eudicots	conserved	Green plants
ath-miR390a-5p	AT2G41600.5	G	g:6	conserved	Land plants	conserved	Seed plants
ath-miR390a-5p	AT3G24660.1	K	k:1116	conserved	Land plants	conserved	Land plants
ath-miR390b-3p	AT2G05170.1	KL	k:1085,l:2	conserved	Rosids	conserved	Green plants
ath-miR390b-5p	AT2G41600.5	G	g:6	conserved	Land plants	conserved	Seed plants
ath-miR390b-5p	AT3G24660.1	K	k:1124	conserved	Land plants	conserved	Land plants	1	482-501~4
ath-miR391-3p	AT1G72000.1	K	k:1126	conserved	Brassicaceae	conserved	Green plants
ath-miR391-3p	AT5G19690.2	KL	k:1097,l:6	conserved	Brassicaceae	conserved	Green plants
ath-miR391-5p	AT1G10700.1	KL	k:1119,l:2	conserved	Brassicaceae	conserved	Green plants	1	2-23~2
ath-miR391-5p	AT1G10700.2	KL	k:1119,l:2	conserved	Brassicaceae	conserved	Green plants	1	55-76~2
ath-miR391-5p	AT3G51990.1	K	k:638	conserved	Brassicaceae	conserved	Land plants
ath-miR391-5p	AT4G21770.1	G	g:3	conserved	Brassicaceae	conserved	Green plants
ath-miR391-5p	AT4G29900.1	K	k:1077	conserved	Brassicaceae	conserved	Green plants	1	298-318~6
ath-miR3932a	AT1G22370.1	G	g:13	non-conserved	Arabidopsis thaliana	conserved	Land plants
ath-miR3932a	AT1G54850.1	KL	k:1011,l:40	non-conserved	Arabidopsis thaliana	conserved	Land plants	1	762-782~3
ath-miR3932a	AT3G54430.1	G	g:34	non-conserved	Arabidopsis thaliana	conserved	Green plants
ath-miR3932a	AT4G13575.2	K	k:154	non-conserved	Arabidopsis thaliana	non-conserved	Arabidopsis thaliana
ath-miR3932b-3p	AT1G06160.1	G	g:3	non-conserved	Arabidopsis thaliana	conserved	Land plants
ath-miR3932b-3p	AT1G22370.1	G	g:12	non-conserved	Arabidopsis thaliana	conserved	Land plants
ath-miR3932b-3p	AT1G54850.1	KL	k:1020,l:21	non-conserved	Arabidopsis thaliana	conserved	Land plants	1	762-782~1
ath-miR3932b-3p	AT1G55900.1	G	g:4	non-conserved	Arabidopsis thaliana	conserved	Green plants
ath-miR3932b-3p	AT1G55900.2	G	g:4	non-conserved	Arabidopsis thaliana	conserved	Green plants
ath-miR3932b-3p	AT2G17520.1	G	g:4	non-conserved	Arabidopsis thaliana	conserved	Green plants
ath-miR3932b-3p	AT3G54430.1	G	g:11	non-conserved	Arabidopsis thaliana	conserved	Green plants
ath-miR3932b-3p	AT4G13575.2	K	k:154	non-conserved	Arabidopsis thaliana	non-conserved	Arabidopsis thaliana
ath-miR3932b-3p	AT5G12300.1	G	g:4	non-conserved	Arabidopsis thaliana	conserved	Vascular plants
ath-miR3932b-5p	AT1G01580.1	G	g:2	non-conserved	Arabidopsis thaliana	conserved	Green plants
ath-miR3932b-5p	AT1G01580.2	G	g:2	non-conserved	Arabidopsis thaliana	conserved	Green plants
ath-miR3932b-5p	AT3G08840.1	G	g:3	non-conserved	Arabidopsis thaliana	conserved	Green plants
ath-miR3932b-5p	AT3G08840.10	G	g:3	non-conserved	Arabidopsis thaliana	conserved	Green plants
ath-miR3932b-5p	AT3G08840.2	G	g:2	non-conserved	Arabidopsis thaliana	conserved	Green plants
ath-miR3932b-5p	AT3G08840.3	G	g:2	non-conserved	Arabidopsis thaliana	conserved	Green plants
ath-miR3932b-5p	AT3G08840.4	G	g:3	non-conserved	Arabidopsis thaliana	conserved	Green plants
ath-miR3932b-5p	AT3G08840.5	G	g:3	non-conserved	Arabidopsis thaliana	conserved	Green plants
ath-miR3932b-5p	AT3G08840.6	G	g:3	non-conserved	Arabidopsis thaliana	conserved	Green plants
ath-miR3932b-5p	AT3G08840.7	G	g:3	non-conserved	Arabidopsis thaliana	conserved	Green plants
ath-miR3932b-5p	AT3G08840.8	G	g:3	non-conserved	Arabidopsis thaliana	conserved	Green plants
ath-miR3932b-5p	AT3G08840.9	G	g:3	non-conserved	Arabidopsis thaliana	conserved	Green plants
ath-miR3932b-5p	AT3G13290.1	G	g:5	non-conserved	Arabidopsis thaliana	conserved	Green plants
ath-miR3932b-5p	AT3G13300.1	G	g:3	non-conserved	Arabidopsis thaliana	conserved	Green plants
ath-miR3932b-5p	AT3G13300.2	G	g:5	non-conserved	Arabidopsis thaliana	conserved	Green plants
ath-miR3932b-5p	AT3G13300.3	G	g:3	non-conserved	Arabidopsis thaliana	conserved	Green plants
ath-miR3932b-5p	AT3G16840.1	G	g:7	non-conserved	Arabidopsis thaliana	conserved	Green plants
ath-miR3932b-5p	AT3G16840.2	G	g:7	non-conserved	Arabidopsis thaliana	conserved	Green plants
ath-miR3932b-5p	AT3G46735.2	G	g:1	non-conserved	Arabidopsis thaliana	non-conserved	Arabidopsis thaliana
ath-miR3932b-5p	AT5G40450.1	G	g:56	non-conserved	Arabidopsis thaliana	conserved	Brassicaceae
ath-miR3932b-5p	AT5G40450.2	G	g:54	non-conserved	Arabidopsis thaliana	conserved	Brassicaceae
ath-miR3932b-5p	AT5G41840.1	KL	k:1011,l:4	non-conserved	Arabidopsis thaliana	conserved	Flowering plants
ath-miR3933	AT1G51860.1	G	g:9	non-conserved	Arabidopsis thaliana	conserved	Green plants
ath-miR3933	AT1G51860.2	G	g:13	non-conserved	Arabidopsis thaliana	conserved	Green plants
ath-miR3933	AT3G53080.1	KL	k:1096,l:19	non-conserved	Arabidopsis thaliana	conserved	Eudicots
ath-miR3933	AT5G10745.1	G	g:1	non-conserved	Arabidopsis thaliana	conserved	Land plants
ath-miR393a-3p	AT1G61350.1	K	k:1031	conserved	Rosids	conserved	Flowering plants	1	1452-1472~1
ath-miR393a-3p	AT3G62700.1	K	k:1078	conserved	Rosids	conserved	Green plants
ath-miR393a-5p	AT1G12820.1	K	k:1039	conserved	Seed plants	conserved	Land plants	1	1888-1909~13
ath-miR393a-5p	AT3G23690.1	K	k:946	conserved	Seed plants	conserved	Green plants	1	751-772~5
ath-miR393a-5p	AT3G26810.1	K	k:919	conserved	Seed plants	conserved	Land plants	1	2191-2212~8
ath-miR393a-5p	AT3G62980.1	K	k:1089	conserved	Seed plants	conserved	Land plants	1	1964-1986~7
ath-miR393b-5p	AT1G12820.1	K	k:1039	conserved	Seed plants	conserved	Land plants	1	1888-1909~3
ath-miR393b-5p	AT3G23690.1	K	k:946	conserved	Seed plants	conserved	Green plants	1	751-772~4
ath-miR393b-5p	AT3G26810.1	K	k:919	conserved	Seed plants	conserved	Land plants	1	2191-2212~4
ath-miR393b-5p	AT3G62980.1	K	k:1089	conserved	Seed plants	conserved	Land plants	1	1964-1986~4
ath-miR394a	AT1G27340.1	K	k:1039	conserved	Seed plants	conserved	Land plants	1	1549-1568~5
ath-miR394a	AT1G40104.1	KL	k:1112,l:23	conserved	Seed plants	non-conserved	Arabidopsis thaliana
ath-miR394a	AT4G20430.1	KL	k:458,l:6	conserved	Seed plants	conserved	Vascular plants
ath-miR394a	AT4G20430.2	KL	k:586,l:5	conserved	Seed plants	conserved	Vascular plants
ath-miR394a	AT4G20430.3	KL	k:650,l:4	conserved	Seed plants	conserved	Vascular plants
ath-miR394b-5p	AT1G27340.1	K	k:1039	conserved	Seed plants	conserved	Land plants	1	1549-1568~4
ath-miR394b-5p	AT1G40104.1	KL	k:1112,l:23	conserved	Seed plants	non-conserved	Arabidopsis thaliana
ath-miR394b-5p	AT4G20430.1	KL	k:458,l:6	conserved	Seed plants	conserved	Vascular plants
ath-miR394b-5p	AT4G20430.2	KL	k:586,l:5	conserved	Seed plants	conserved	Vascular plants
ath-miR394b-5p	AT4G20430.3	KL	k:650,l:4	conserved	Seed plants	conserved	Vascular plants
ath-miR395a	AT1G50930.2	K	k:1051	conserved	Seed plants	conserved	Rosids	1	69-89~1
ath-miR395a	AT2G28780.1	K	k:1118	conserved	Seed plants	conserved	Green plants
ath-miR395a	AT3G22890.1	K	k:791	conserved	Seed plants	conserved	Green plants	1	551-571~8
ath-miR395a	AT4G14680.1	K	k:217	conserved	Seed plants	conserved	Green plants
ath-miR395a	AT4G14680.2	K	k:197	conserved	Seed plants	conserved	Green plants	1	628-648~2
ath-miR395a	AT4G23840.1	K	k:1058	conserved	Seed plants	conserved	Green plants
ath-miR395a	AT5G10180.1	K	k:875	conserved	Seed plants	conserved	Green plants	1	252-272~1
ath-miR395a	AT5G13630.1	K	k:911	conserved	Seed plants	conserved	Green plants	1	3769-3789~5
ath-miR395a	AT5G13630.2	K	k:911	conserved	Seed plants	conserved	Green plants	1	3567-3587~2
ath-miR395a	AT5G43780.1	K	k:727	conserved	Seed plants	conserved	Green plants	1	597-617~3
ath-miR395b	AT1G50930.2	K	k:1051	conserved	Seed plants	conserved	Rosids
ath-miR395b	AT2G28780.1	K	k:1118	conserved	Seed plants	conserved	Green plants
ath-miR395b	AT3G22890.1	K	k:791	conserved	Seed plants	conserved	Green plants
ath-miR395b	AT4G14680.1	K	k:217	conserved	Seed plants	conserved	Green plants
ath-miR395b	AT4G14680.2	K	k:197	conserved	Seed plants	conserved	Green plants
ath-miR395b	AT5G10180.1	K	k:875	conserved	Seed plants	conserved	Green plants
ath-miR395b	AT5G20120.1	G	g:1	conserved	Seed plants	conserved	Green plants
ath-miR395b	AT5G20120.2	G	g:1	conserved	Seed plants	conserved	Green plants
ath-miR395b	AT5G43780.1	K	k:727	conserved	Seed plants	conserved	Green plants
ath-miR395c	AT1G50930.2	K	k:1051	conserved	Seed plants	conserved	Rosids
ath-miR395c	AT2G28780.1	K	k:1118	conserved	Seed plants	conserved	Green plants
ath-miR395c	AT3G22890.1	K	k:791	conserved	Seed plants	conserved	Green plants
ath-miR395c	AT4G14680.1	K	k:217	conserved	Seed plants	conserved	Green plants
ath-miR395c	AT4G14680.2	K	k:197	conserved	Seed plants	conserved	Green plants
ath-miR395c	AT5G10180.1	K	k:875	conserved	Seed plants	conserved	Green plants
ath-miR395c	AT5G20120.1	G	g:1	conserved	Seed plants	conserved	Green plants
ath-miR395c	AT5G20120.2	G	g:1	conserved	Seed plants	conserved	Green plants
ath-miR395c	AT5G43780.1	K	k:727	conserved	Seed plants	conserved	Green plants
ath-miR395d	AT1G50930.2	K	k:1051	conserved	Seed plants	conserved	Rosids
ath-miR395d	AT2G28780.1	K	k:1118	conserved	Seed plants	conserved	Green plants
ath-miR395d	AT3G22890.1	K	k:791	conserved	Seed plants	conserved	Green plants
ath-miR395d	AT4G14680.1	K	k:217	conserved	Seed plants	conserved	Green plants
ath-miR395d	AT4G14680.2	K	k:197	conserved	Seed plants	conserved	Green plants
[truncated: 7,043 more rows]

## Sheet: Table S4
Supplementary Table S4. miRNA-miRNA crosstalk network including 200 miRNAs and 506 cooperative interactions which coregulate 612 transcripts.
miRNA1	miRNA2	Conservation1	Age1	Conservation2	Age2	Num of common targets	Common target transcripts	Num of ss coregulation motifs	Num of dd coregulation motifs	Num of sd coregulation motifs	Percentage of ss coregulation motifs	Percentage of dd coregulation motifs	Percentage of sd coregulation motifs	Cooperation type for the miRNA-miRNA pair	miRNA family or interfamily	Conservation of miRNA family	Edge betweenness centrality	Is a bridge	Degree1	Is miRNA1 a hub?	Node betweenness1	Is miRNA1 a bottleneck?	Degree2	Is miRNA2 a hub?	Node betweenness2	Is miRNA2 a bottleneck?	Num of stress genes this miRNA pair co-regulates	List of stress genes	Num of stress types miRNA1 responds to	Stress types miRNA1 responds to	Num of stress types miRNA2 responds to	Stress types miRNA2 responds to	Num of identical types of stress the miRNA pair is involved in	PPImiRFS	Expression correlation
ath-miR156a-5p	ath-miR156b-5p	conserved	Land plants	conserved	Land plants	41	AT1G25500.2,AT1G25500.3,AT1G27360.1,AT1G27360.2,AT1G27360.3,AT1G27360.4,AT1G27370.1,AT1G27370.2,AT1G27370.3,AT1G27370.4,AT1G27370.5,AT1G27370.6,AT1G27370.7,AT1G53160.1,AT1G68960.2,AT1G69170.1,AT2G07718.1,AT2G17640.1,AT2G21840.1,AT2G21850.1,AT2G33810.1,AT2G37860.1,AT2G42200.1,AT3G02210.1,AT3G06250.2,AT3G06250.3,AT3G15270.1,AT3G28690.1,AT3G51910.1,AT3G57920.1,AT3G62420.1,AT4G35170.1,AT5G03140.1,AT5…	36	5	0	0.878049	0.121951	0	SS	miR156/157	conserved family	2	n	15	y	0.00706983	n	15	y	0.00706983	n	6	AT3G62420,AT3G28690,AT5G03140,AT3G06250,AT3G51910,AT2G33810	8	Cold,Drought,Heat,Lipopolysaccharide,Pectobacterium carotovorum,Phosphate-deficiency,Salt,Sulphur-deficiency	8	Cold,Drought,Heat,Lipopolysaccharide,Pectobacterium carotovorum,Phosphate-deficiency,Salt,Sulphur-deficiency	8	1	1
ath-miR156a-5p	ath-miR156c-5p	conserved	Land plants	conserved	Land plants	41	AT1G25500.2,AT1G25500.3,AT1G27360.1,AT1G27360.2,AT1G27360.3,AT1G27360.4,AT1G27370.1,AT1G27370.2,AT1G27370.3,AT1G27370.4,AT1G27370.5,AT1G27370.6,AT1G27370.7,AT1G53160.1,AT1G68960.2,AT1G69170.1,AT2G07718.1,AT2G17640.1,AT2G21840.1,AT2G21850.1,AT2G33810.1,AT2G37860.1,AT2G42200.1,AT3G02210.1,AT3G06250.2,AT3G06250.3,AT3G15270.1,AT3G28690.1,AT3G51910.1,AT3G57920.1,AT3G62420.1,AT4G35170.1,AT5G03140.1,AT5…	36	5	0	0.878049	0.121951	0	SS	miR156/157	conserved family	2	n	15	y	0.00706983	n	15	y	0.00706983	n	6	AT3G62420,AT3G28690,AT5G03140,AT3G06250,AT3G51910,AT2G33810	8	Cold,Drought,Heat,Lipopolysaccharide,Pectobacterium carotovorum,Phosphate-deficiency,Salt,Sulphur-deficiency	8	Cold,Drought,Heat,Lipopolysaccharide,Pectobacterium carotovorum,Phosphate-deficiency,Salt,Sulphur-deficiency	8	1	1
ath-miR156a-5p	ath-miR156d-5p	conserved	Land plants	conserved	Land plants	40	AT1G25500.2,AT1G25500.3,AT1G27360.1,AT1G27360.2,AT1G27360.3,AT1G27360.4,AT1G27370.1,AT1G27370.2,AT1G27370.3,AT1G27370.4,AT1G27370.5,AT1G27370.6,AT1G27370.7,AT1G53160.1,AT1G69170.1,AT2G07718.1,AT2G17640.1,AT2G21840.1,AT2G21850.1,AT2G33810.1,AT2G37860.1,AT2G42200.1,AT3G02210.1,AT3G06250.2,AT3G06250.3,AT3G15270.1,AT3G28690.1,AT3G51910.1,AT3G57920.1,AT3G62420.1,AT4G35170.1,AT5G03140.1,AT5G42040.1,AT5…	27	4	9	0.675	0.1	0.225	SS	miR156/157	conserved family	2	n	15	y	0.00706983	n	15	y	0.00706983	n	6	AT3G62420,AT3G28690,AT5G03140,AT3G06250,AT3G51910,AT2G33810	8	Cold,Drought,Heat,Lipopolysaccharide,Pectobacterium carotovorum,Phosphate-deficiency,Salt,Sulphur-deficiency	8	Cold,Drought,Heat,Lipopolysaccharide,Pectobacterium carotovorum,Phosphate-deficiency,Salt,Sulphur-deficiency	8	1	0.883905
ath-miR156a-5p	ath-miR156e	conserved	Land plants	conserved	Land plants	41	AT1G25500.2,AT1G25500.3,AT1G27360.1,AT1G27360.2,AT1G27360.3,AT1G27360.4,AT1G27370.1,AT1G27370.2,AT1G27370.3,AT1G27370.4,AT1G27370.5,AT1G27370.6,AT1G27370.7,AT1G53160.1,AT1G68960.2,AT1G69170.1,AT2G07718.1,AT2G17640.1,AT2G21840.1,AT2G21850.1,AT2G33810.1,AT2G37860.1,AT2G42200.1,AT3G02210.1,AT3G06250.2,AT3G06250.3,AT3G15270.1,AT3G28690.1,AT3G51910.1,AT3G57920.1,AT3G62420.1,AT4G35170.1,AT5G03140.1,AT5…	36	5	0	0.878049	0.121951	0	SS	miR156/157	conserved family	2	n	15	y	0.00706983	n	15	y	0.00706983	n	6	AT3G62420,AT3G28690,AT5G03140,AT3G06250,AT3G51910,AT2G33810	8	Cold,Drought,Heat,Lipopolysaccharide,Pectobacterium carotovorum,Phosphate-deficiency,Salt,Sulphur-deficiency	8	Cold,Drought,Heat,Lipopolysaccharide,Pectobacterium carotovorum,Phosphate-deficiency,Salt,Sulphur-deficiency	8	1	1
ath-miR156a-5p	ath-miR156f-5p	conserved	Land plants	conserved	Land plants	41	AT1G25500.2,AT1G25500.3,AT1G27360.1,AT1G27360.2,AT1G27360.3,AT1G27360.4,AT1G27370.1,AT1G27370.2,AT1G27370.3,AT1G27370.4,AT1G27370.5,AT1G27370.6,AT1G27370.7,AT1G53160.1,AT1G68960.2,AT1G69170.1,AT2G07718.1,AT2G17640.1,AT2G21840.1,AT2G21850.1,AT2G33810.1,AT2G37860.1,AT2G42200.1,AT3G02210.1,AT3G06250.2,AT3G06250.3,AT3G15270.1,AT3G28690.1,AT3G51910.1,AT3G57920.1,AT3G62420.1,AT4G35170.1,AT5G03140.1,AT5…	36	5	0	0.878049	0.121951	0	SS	miR156/157	conserved family	2	n	15	y	0.00706983	n	15	y	0.00706983	n	6	AT3G62420,AT3G28690,AT5G03140,AT3G06250,AT3G51910,AT2G33810	8	Cold,Drought,Heat,Lipopolysaccharide,Pectobacterium carotovorum,Phosphate-deficiency,Salt,Sulphur-deficiency	9	Brassinosteroid,Cold,Drought,Heat,Lipopolysaccharide,Pectobacterium carotovorum,Phosphate-deficiency,Salt,Sulphur-deficiency	8	1	1
ath-miR156a-5p	ath-miR156g	conserved	Land plants	conserved	Land plants	32	AT1G27360.1,AT1G27360.2,AT1G27360.3,AT1G27360.4,AT1G27370.1,AT1G27370.2,AT1G27370.3,AT1G27370.4,AT1G27370.5,AT1G27370.6,AT1G27370.7,AT1G53160.1,AT1G68960.2,AT1G69170.1,AT2G17640.1,AT2G21840.1,AT2G33810.1,AT2G42200.1,AT3G02210.1,AT3G15270.1,AT3G28690.1,AT3G57920.1,AT4G35170.1,AT5G03140.1,AT5G42040.1,AT5G43270.1,AT5G43270.2,AT5G43270.3,AT5G50570.1,AT5G50570.2,AT5G50670.1,AT5G50670.2	29	3	0	0.90625	0.09375	0	SS	miR156/157	conserved family	2	n	15	y	0.00706983	n	15	y	0.00706983	n	3	AT3G28690,AT5G03140,AT2G33810	8	Cold,Drought,Heat,Lipopolysaccharide,Pectobacterium carotovorum,Phosphate-deficiency,Salt,Sulphur-deficiency	9	Cold,Drought,Heat,Hypoxic stress,Lipopolysaccharide,Pectobacterium carotovorum,Phosphate-deficiency,Salt,Sulphur-deficiency	8	0.980307	0.991492
ath-miR156a-5p	ath-miR156h	conserved	Land plants	conserved	Vascular plants	27	AT1G27360.1,AT1G27360.2,AT1G27360.3,AT1G27360.4,AT1G27370.1,AT1G27370.2,AT1G27370.3,AT1G27370.4,AT1G27370.5,AT1G27370.6,AT1G27370.7,AT1G53160.1,AT1G69170.1,AT2G42200.1,AT3G06250.2,AT3G06250.3,AT3G15270.1,AT3G28690.1,AT3G51910.1,AT3G57920.1,AT5G43270.1,AT5G43270.2,AT5G43270.3,AT5G50570.1,AT5G50570.2,AT5G50670.1,AT5G50670.2	27	0	0	1	0	0	SS	miR156/157	conserved family	17.6833	n	15	y	0.00706983	n	16	y	0.0159535	y	3	AT3G28690,AT3G06250,AT3G51910	8	Cold,Drought,Heat,Lipopolysaccharide,Pectobacterium carotovorum,Phosphate-deficiency,Salt,Sulphur-deficiency	9	Cold,Drought,Heat,Lipopolysaccharide,Ozone,Pectobacterium carotovorum,Phosphate-deficiency,Salt,Sulphur-deficiency	8	0.770384	0.564433
ath-miR156a-5p	ath-miR156i	conserved	Land plants	conserved	Land plants	26	AT1G27360.1,AT1G27360.2,AT1G27360.3,AT1G27360.4,AT1G27370.1,AT1G27370.2,AT1G27370.3,AT1G27370.4,AT1G27370.5,AT1G27370.6,AT1G27370.7,AT1G53160.1,AT1G69170.1,AT2G17640.1,AT2G33810.1,AT2G42200.1,AT3G02210.1,AT3G15270.1,AT3G57920.1,AT5G43270.1,AT5G43270.2,AT5G43270.3,AT5G50570.1,AT5G50570.2,AT5G50670.1,AT5G50670.2	25	1	0	0.961538	0.0384615	0	SS	miR156/157	conserved family	2	n	15	y	0.00706983	n	15	y	0.00706983	n	1	AT2G33810	8	Cold,Drought,Heat,Lipopolysaccharide,Pectobacterium carotovorum,Phosphate-deficiency,Salt,Sulphur-deficiency	8	Cold,Drought,Heat,Lipopolysaccharide,Pectobacterium carotovorum,Phosphate-deficiency,Salt,Sulphur-deficiency	8	0.801807	0.34312
ath-miR156a-5p	ath-miR156j	conserved	Land plants	conserved	Land plants	28	AT1G27360.1,AT1G27360.2,AT1G27360.3,AT1G27360.4,AT1G27370.1,AT1G27370.2,AT1G27370.3,AT1G27370.4,AT1G27370.5,AT1G27370.6,AT1G27370.7,AT1G53160.1,AT1G69170.1,AT2G07718.1,AT2G17640.1,AT2G33810.1,AT2G42200.1,AT3G15270.1,AT3G28690.1,AT3G57920.1,AT3G62420.1,AT5G43270.1,AT5G43270.2,AT5G43270.3,AT5G50570.1,AT5G50570.2,AT5G50670.1,AT5G50670.2	27	1	0	0.964286	0.0357143	0	SS	miR156/157	conserved family	13.1833	n	15	y	0.00706983	n	19	y	0.053095	y	3	AT3G62420,AT3G28690,AT2G33810	8	Cold,Drought,Heat,Lipopolysaccharide,Pectobacterium carotovorum,Phosphate-deficiency,Salt,Sulphur-deficiency	8	Cold,Drought,Heat,Lipopolysaccharide,Pectobacterium carotovorum,Phosphate-deficiency,Salt,Sulphur-deficiency	8	0.908426	0.967083
ath-miR156a-5p	ath-miR157a-5p	conserved	Land plants	conserved	Vascular plants	22	AT1G27360.1,AT1G27360.2,AT1G27360.3,AT1G27360.4,AT1G27370.1,AT1G27370.2,AT1G27370.3,AT1G27370.4,AT1G27370.5,AT1G27370.6,AT1G27370.7,AT1G53160.1,AT1G69170.1,AT2G42200.1,AT3G57920.1,AT5G43270.1,AT5G43270.2,AT5G43270.3,AT5G50570.1,AT5G50570.2,AT5G50670.1,AT5G50670.2	21	0	1	0.954545	0	0.0454545	SS	miR156/157	conserved family	41.6477	n	15	y	0.00706983	n	15	y	0.0303704	y	0		8	Cold,Drought,Heat,Lipopolysaccharide,Pectobacterium carotovorum,Phosphate-deficiency,Salt,Sulphur-deficiency	1	Cold	1	0.934174	0.87654
ath-miR156a-5p	ath-miR157b-5p	conserved	Land plants	conserved	Vascular plants	22	AT1G27360.1,AT1G27360.2,AT1G27360.3,AT1G27360.4,AT1G27370.1,AT1G27370.2,AT1G27370.3,AT1G27370.4,AT1G27370.5,AT1G27370.6,AT1G27370.7,AT1G53160.1,AT1G69170.1,AT2G42200.1,AT3G57920.1,AT5G43270.1,AT5G43270.2,AT5G43270.3,AT5G50570.1,AT5G50570.2,AT5G50670.1,AT5G50670.2	21	0	1	0.954545	0	0.0454545	SS	miR156/157	conserved family	41.6477	n	15	y	0.00706983	n	15	y	0.0303704	y	0		8	Cold,Drought,Heat,Lipopolysaccharide,Pectobacterium carotovorum,Phosphate-deficiency,Salt,Sulphur-deficiency	1	Cold	1	0.934174	0.87654
ath-miR156a-5p	ath-miR157c-5p	conserved	Land plants	conserved	Vascular plants	22	AT1G27360.1,AT1G27360.2,AT1G27360.3,AT1G27360.4,AT1G27370.1,AT1G27370.2,AT1G27370.3,AT1G27370.4,AT1G27370.5,AT1G27370.6,AT1G27370.7,AT1G53160.1,AT1G69170.1,AT2G42200.1,AT3G57920.1,AT5G43270.1,AT5G43270.2,AT5G43270.3,AT5G50570.1,AT5G50570.2,AT5G50670.1,AT5G50670.2	21	0	1	0.954545	0	0.0454545	SS	miR156/157	conserved family	41.6477	n	15	y	0.00706983	n	15	y	0.0303704	y	0		8	Cold,Drought,Heat,Lipopolysaccharide,Pectobacterium carotovorum,Phosphate-deficiency,Salt,Sulphur-deficiency	1	Cold	1	0.934174	0.87654
ath-miR156a-5p	ath-miR157d	conserved	Land plants	conserved	Vascular plants	23	AT1G27360.1,AT1G27360.2,AT1G27360.3,AT1G27360.4,AT1G27370.1,AT1G27370.2,AT1G27370.3,AT1G27370.4,AT1G27370.5,AT1G27370.6,AT1G27370.7,AT1G53160.1,AT1G69170.1,AT2G42200.1,AT3G15270.1,AT3G57920.1,AT5G43270.1,AT5G43270.2,AT5G43270.3,AT5G50570.1,AT5G50570.2,AT5G50670.1,AT5G50670.2	23	0	0	1	0	0	SS	miR156/157	conserved family	13.4084	n	15	y	0.00706983	n	15	y	0.00127722	n	0		8	Cold,Drought,Heat,Lipopolysaccharide,Pectobacterium carotovorum,Phosphate-deficiency,Salt,Sulphur-deficiency	2	Cold,Hypoxic stress	1	0.84611	-0.127261
ath-miR156a-5p	ath-miR5021	conserved	Land plants	non-conserved	Arabidopsis thaliana	1	AT2G33810.1	0	0	1	0	0	1	SD	interfamily		248.149	n	15	y	0.00706983	n	54	y	0.660861	y	1	AT2G33810	8	Cold,Drought,Heat,Lipopolysaccharide,Pectobacterium carotovorum,Phosphate-deficiency,Salt,Sulphur-deficiency	0		0	0.482114
ath-miR156a-5p	ath-miR5658	conserved	Land plants	non-conserved	Arabidopsis thaliana	2	AT1G27360.2,AT1G27360.4	0	0	2	0	0	1	SD	interfamily		77.1357	n	15	y	0.00706983	n	46	y	0.431559	y	0		8	Cold,Drought,Heat,Lipopolysaccharide,Pectobacterium carotovorum,Phosphate-deficiency,Salt,Sulphur-deficiency	0		0	0.499316	0.166328
ath-miR156b-5p	ath-miR156c-5p	conserved	Land plants	conserved	Land plants	41	AT1G25500.2,AT1G25500.3,AT1G27360.1,AT1G27360.2,AT1G27360.3,AT1G27360.4,AT1G27370.1,AT1G27370.2,AT1G27370.3,AT1G27370.4,AT1G27370.5,AT1G27370.6,AT1G27370.7,AT1G53160.1,AT1G68960.2,AT1G69170.1,AT2G07718.1,AT2G17640.1,AT2G21840.1,AT2G21850.1,AT2G33810.1,AT2G37860.1,AT2G42200.1,AT3G02210.1,AT3G06250.2,AT3G06250.3,AT3G15270.1,AT3G28690.1,AT3G51910.1,AT3G57920.1,AT3G62420.1,AT4G35170.1,AT5G03140.1,AT5…	36	5	0	0.878049	0.121951	0	SS	miR156/157	conserved family	2	n	15	y	0.00706983	n	15	y	0.00706983	n	6	AT3G62420,AT3G28690,AT5G03140,AT3G06250,AT3G51910,AT2G33810	8	Cold,Drought,Heat,Lipopolysaccharide,Pectobacterium carotovorum,Phosphate-deficiency,Salt,Sulphur-deficiency	8	Cold,Drought,Heat,Lipopolysaccharide,Pectobacterium carotovorum,Phosphate-deficiency,Salt,Sulphur-deficiency	8	1	1
ath-miR156b-5p	ath-miR156d-5p	conserved	Land plants	conserved	Land plants	40	AT1G25500.2,AT1G25500.3,AT1G27360.1,AT1G27360.2,AT1G27360.3,AT1G27360.4,AT1G27370.1,AT1G27370.2,AT1G27370.3,AT1G27370.4,AT1G27370.5,AT1G27370.6,AT1G27370.7,AT1G53160.1,AT1G69170.1,AT2G07718.1,AT2G17640.1,AT2G21840.1,AT2G21850.1,AT2G33810.1,AT2G37860.1,AT2G42200.1,AT3G02210.1,AT3G06250.2,AT3G06250.3,AT3G15270.1,AT3G28690.1,AT3G51910.1,AT3G57920.1,AT3G62420.1,AT4G35170.1,AT5G03140.1,AT5G42040.1,AT5…	27	4	9	0.675	0.1	0.225	SS	miR156/157	conserved family	2	n	15	y	0.00706983	n	15	y	0.00706983	n	6	AT3G62420,AT3G28690,AT5G03140,AT3G06250,AT3G51910,AT2G33810	8	Cold,Drought,Heat,Lipopolysaccharide,Pectobacterium carotovorum,Phosphate-deficiency,Salt,Sulphur-deficiency	8	Cold,Drought,Heat,Lipopolysaccharide,Pectobacterium carotovorum,Phosphate-deficiency,Salt,Sulphur-deficiency	8	1	0.889272
ath-miR156b-5p	ath-miR156e	conserved	Land plants	conserved	Land plants	41	AT1G25500.2,AT1G25500.3,AT1G27360.1,AT1G27360.2,AT1G27360.3,AT1G27360.4,AT1G27370.1,AT1G27370.2,AT1G27370.3,AT1G27370.4,AT1G27370.5,AT1G27370.6,AT1G27370.7,AT1G53160.1,AT1G68960.2,AT1G69170.1,AT2G07718.1,AT2G17640.1,AT2G21840.1,AT2G21850.1,AT2G33810.1,AT2G37860.1,AT2G42200.1,AT3G02210.1,AT3G06250.2,AT3G06250.3,AT3G15270.1,AT3G28690.1,AT3G51910.1,AT3G57920.1,AT3G62420.1,AT4G35170.1,AT5G03140.1,AT5…	36	5	0	0.878049	0.121951	0	SS	miR156/157	conserved family	2	n	15	y	0.00706983	n	15	y	0.00706983	n	6	AT3G62420,AT3G28690,AT5G03140,AT3G06250,AT3G51910,AT2G33810	8	Cold,Drought,Heat,Lipopolysaccharide,Pectobacterium carotovorum,Phosphate-deficiency,Salt,Sulphur-deficiency	8	Cold,Drought,Heat,Lipopolysaccharide,Pectobacterium carotovorum,Phosphate-deficiency,Salt,Sulphur-deficiency	8	1	1
ath-miR156b-5p	ath-miR156f-5p	conserved	Land plants	conserved	Land plants	41	AT1G25500.2,AT1G25500.3,AT1G27360.1,AT1G27360.2,AT1G27360.3,AT1G27360.4,AT1G27370.1,AT1G27370.2,AT1G27370.3,AT1G27370.4,AT1G27370.5,AT1G27370.6,AT1G27370.7,AT1G53160.1,AT1G68960.2,AT1G69170.1,AT2G07718.1,AT2G17640.1,AT2G21840.1,AT2G21850.1,AT2G33810.1,AT2G37860.1,AT2G42200.1,AT3G02210.1,AT3G06250.2,AT3G06250.3,AT3G15270.1,AT3G28690.1,AT3G51910.1,AT3G57920.1,AT3G62420.1,AT4G35170.1,AT5G03140.1,AT5…	36	5	0	0.878049	0.121951	0	SS	miR156/157	conserved family	2	n	15	y	0.00706983	n	15	y	0.00706983	n	6	AT3G62420,AT3G28690,AT5G03140,AT3G06250,AT3G51910,AT2G33810	8	Cold,Drought,Heat,Lipopolysaccharide,Pectobacterium carotovorum,Phosphate-deficiency,Salt,Sulphur-deficiency	9	Brassinosteroid,Cold,Drought,Heat,Lipopolysaccharide,Pectobacterium carotovorum,Phosphate-deficiency,Salt,Sulphur-deficiency	8	1	1
ath-miR156b-5p	ath-miR156g	conserved	Land plants	conserved	Land plants	32	AT1G27360.1,AT1G27360.2,AT1G27360.3,AT1G27360.4,AT1G27370.1,AT1G27370.2,AT1G27370.3,AT1G27370.4,AT1G27370.5,AT1G27370.6,AT1G27370.7,AT1G53160.1,AT1G68960.2,AT1G69170.1,AT2G17640.1,AT2G21840.1,AT2G33810.1,AT2G42200.1,AT3G02210.1,AT3G15270.1,AT3G28690.1,AT3G57920.1,AT4G35170.1,AT5G03140.1,AT5G42040.1,AT5G43270.1,AT5G43270.2,AT5G43270.3,AT5G50570.1,AT5G50570.2,AT5G50670.1,AT5G50670.2	29	3	0	0.90625	0.09375	0	SS	miR156/157	conserved family	2	n	15	y	0.00706983	n	15	y	0.00706983	n	3	AT3G28690,AT5G03140,AT2G33810	8	Cold,Drought,Heat,Lipopolysaccharide,Pectobacterium carotovorum,Phosphate-deficiency,Salt,Sulphur-deficiency	9	Cold,Drought,Heat,Hypoxic stress,Lipopolysaccharide,Pectobacterium carotovorum,Phosphate-deficiency,Salt,Sulphur-deficiency	8	0.980307	0.991828
ath-miR156b-5p	ath-miR156h	conserved	Land plants	conserved	Vascular plants	27	AT1G27360.1,AT1G27360.2,AT1G27360.3,AT1G27360.4,AT1G27370.1,AT1G27370.2,AT1G27370.3,AT1G27370.4,AT1G27370.5,AT1G27370.6,AT1G27370.7,AT1G53160.1,AT1G69170.1,AT2G42200.1,AT3G06250.2,AT3G06250.3,AT3G15270.1,AT3G28690.1,AT3G51910.1,AT3G57920.1,AT5G43270.1,AT5G43270.2,AT5G43270.3,AT5G50570.1,AT5G50570.2,AT5G50670.1,AT5G50670.2	27	0	0	1	0	0	SS	miR156/157	conserved family	17.6833	n	15	y	0.00706983	n	16	y	0.0159535	y	3	AT3G28690,AT3G06250,AT3G51910	8	Cold,Drought,Heat,Lipopolysaccharide,Pectobacterium carotovorum,Phosphate-deficiency,Salt,Sulphur-deficiency	9	Cold,Drought,Heat,Lipopolysaccharide,Ozone,Pectobacterium carotovorum,Phosphate-deficiency,Salt,Sulphur-deficiency	8	0.770384	0.587761
ath-miR156b-5p	ath-miR156i	conserved	Land plants	conserved	Land plants	26	AT1G27360.1,AT1G27360.2,AT1G27360.3,AT1G27360.4,AT1G27370.1,AT1G27370.2,AT1G27370.3,AT1G27370.4,AT1G27370.5,AT1G27370.6,AT1G27370.7,AT1G53160.1,AT1G69170.1,AT2G17640.1,AT2G33810.1,AT2G42200.1,AT3G02210.1,AT3G15270.1,AT3G57920.1,AT5G43270.1,AT5G43270.2,AT5G43270.3,AT5G50570.1,AT5G50570.2,AT5G50670.1,AT5G50670.2	25	1	0	0.961538	0.0384615	0	SS	miR156/157	conserved family	2	n	15	y	0.00706983	n	15	y	0.00706983	n	1	AT2G33810	8	Cold,Drought,Heat,Lipopolysaccharide,Pectobacterium carotovorum,Phosphate-deficiency,Salt,Sulphur-deficiency	8	Cold,Drought,Heat,Lipopolysaccharide,Pectobacterium carotovorum,Phosphate-deficiency,Salt,Sulphur-deficiency	8	0.801807	-0.628552
ath-miR156b-5p	ath-miR156j	conserved	Land plants	conserved	Land plants	28	AT1G27360.1,AT1G27360.2,AT1G27360.3,AT1G27360.4,AT1G27370.1,AT1G27370.2,AT1G27370.3,AT1G27370.4,AT1G27370.5,AT1G27370.6,AT1G27370.7,AT1G53160.1,AT1G69170.1,AT2G07718.1,AT2G17640.1,AT2G33810.1,AT2G42200.1,AT3G15270.1,AT3G28690.1,AT3G57920.1,AT3G62420.1,AT5G43270.1,AT5G43270.2,AT5G43270.3,AT5G50570.1,AT5G50570.2,AT5G50670.1,AT5G50670.2	27	1	0	0.964286	0.0357143	0	SS	miR156/157	conserved family	13.1833	n	15	y	0.00706983	n	19	y	0.053095	y	3	AT3G62420,AT3G28690,AT2G33810	8	Cold,Drought,Heat,Lipopolysaccharide,Pectobacterium carotovorum,Phosphate-deficiency,Salt,Sulphur-deficiency	8	Cold,Drought,Heat,Lipopolysaccharide,Pectobacterium carotovorum,Phosphate-deficiency,Salt,Sulphur-deficiency	8	0.908426	0.966819
ath-miR156b-5p	ath-miR157a-5p	conserved	Land plants	conserved	Vascular plants	22	AT1G27360.1,AT1G27360.2,AT1G27360.3,AT1G27360.4,AT1G27370.1,AT1G27370.2,AT1G27370.3,AT1G27370.4,AT1G27370.5,AT1G27370.6,AT1G27370.7,AT1G53160.1,AT1G69170.1,AT2G42200.1,AT3G57920.1,AT5G43270.1,AT5G43270.2,AT5G43270.3,AT5G50570.1,AT5G50570.2,AT5G50670.1,AT5G50670.2	21	0	1	0.954545	0	0.0454545	SS	miR156/157	conserved family	41.6477	n	15	y	0.00706983	n	15	y	0.0303704	y	0		8	Cold,Drought,Heat,Lipopolysaccharide,Pectobacterium carotovorum,Phosphate-deficiency,Salt,Sulphur-deficiency	1	Cold	1	0.934174	0.882326
ath-miR156b-5p	ath-miR157b-5p	conserved	Land plants	conserved	Vascular plants	22	AT1G27360.1,AT1G27360.2,AT1G27360.3,AT1G27360.4,AT1G27370.1,AT1G27370.2,AT1G27370.3,AT1G27370.4,AT1G27370.5,AT1G27370.6,AT1G27370.7,AT1G53160.1,AT1G69170.1,AT2G42200.1,AT3G57920.1,AT5G43270.1,AT5G43270.2,AT5G43270.3,AT5G50570.1,AT5G50570.2,AT5G50670.1,AT5G50670.2	21	0	1	0.954545	0	0.0454545	SS	miR156/157	conserved family	41.6477	n	15	y	0.00706983	n	15	y	0.0303704	y	0		8	Cold,Drought,Heat,Lipopolysaccharide,Pectobacterium carotovorum,Phosphate-deficiency,Salt,Sulphur-deficiency	1	Cold	1	0.934174	0.882326
ath-miR156b-5p	ath-miR157c-5p	conserved	Land plants	conserved	Vascular plants	22	AT1G27360.1,AT1G27360.2,AT1G27360.3,AT1G27360.4,AT1G27370.1,AT1G27370.2,AT1G27370.3,AT1G27370.4,AT1G27370.5,AT1G27370.6,AT1G27370.7,AT1G53160.1,AT1G69170.1,AT2G42200.1,AT3G57920.1,AT5G43270.1,AT5G43270.2,AT5G43270.3,AT5G50570.1,AT5G50570.2,AT5G50670.1,AT5G50670.2	21	0	1	0.954545	0	0.0454545	SS	miR156/157	conserved family	41.6477	n	15	y	0.00706983	n	15	y	0.0303704	y	0		8	Cold,Drought,Heat,Lipopolysaccharide,Pectobacterium carotovorum,Phosphate-deficiency,Salt,Sulphur-deficiency	1	Cold	1	0.934174	0.882326
ath-miR156b-5p	ath-miR157d	conserved	Land plants	conserved	Vascular plants	23	AT1G27360.1,AT1G27360.2,AT1G27360.3,AT1G27360.4,AT1G27370.1,AT1G27370.2,AT1G27370.3,AT1G27370.4,AT1G27370.5,AT1G27370.6,AT1G27370.7,AT1G53160.1,AT1G69170.1,AT2G42200.1,AT3G15270.1,AT3G57920.1,AT5G43270.1,AT5G43270.2,AT5G43270.3,AT5G50570.1,AT5G50570.2,AT5G50670.1,AT5G50670.2	23	0	0	1	0	0	SS	miR156/157	conserved family	13.4084	n	15	y	0.00706983	n	15	y	0.00127722	n	0		8	Cold,Drought,Heat,Lipopolysaccharide,Pectobacterium carotovorum,Phosphate-deficiency,Salt,Sulphur-deficiency	2	Cold,Hypoxic stress	1	0.84611	-0.127261
ath-miR156b-5p	ath-miR5021	conserved	Land plants	non-conserved	Arabidopsis thaliana	1	AT2G33810.1	0	0	1	0	0	1	SD	interfamily		248.149	n	15	y	0.00706983	n	54	y	0.660861	y	1	AT2G33810	8	Cold,Drought,Heat,Lipopolysaccharide,Pectobacterium carotovorum,Phosphate-deficiency,Salt,Sulphur-deficiency	0		0	0.482114
ath-miR156b-5p	ath-miR5658	conserved	Land plants	non-conserved	Arabidopsis thaliana	2	AT1G27360.2,AT1G27360.4	0	0	2	0	0	1	SD	interfamily		77.1357	n	15	y	0.00706983	n	46	y	0.431559	y	0		8	Cold,Drought,Heat,Lipopolysaccharide,Pectobacterium carotovorum,Phosphate-deficiency,Salt,Sulphur-deficiency	0		0	0.499316	0.0421992
ath-miR156c-5p	ath-miR156d-5p	conserved	Land plants	conserved	Land plants	40	AT1G25500.2,AT1G25500.3,AT1G27360.1,AT1G27360.2,AT1G27360.3,AT1G27360.4,AT1G27370.1,AT1G27370.2,AT1G27370.3,AT1G27370.4,AT1G27370.5,AT1G27370.6,AT1G27370.7,AT1G53160.1,AT1G69170.1,AT2G07718.1,AT2G17640.1,AT2G21840.1,AT2G21850.1,AT2G33810.1,AT2G37860.1,AT2G42200.1,AT3G02210.1,AT3G06250.2,AT3G06250.3,AT3G15270.1,AT3G28690.1,AT3G51910.1,AT3G57920.1,AT3G62420.1,AT4G35170.1,AT5G03140.1,AT5G42040.1,AT5…	27	4	9	0.675	0.1	0.225	SS	miR156/157	conserved family	2	n	15	y	0.00706983	n	15	y	0.00706983	n	6	AT3G62420,AT3G28690,AT5G03140,AT3G06250,AT3G51910,AT2G33810	8	Cold,Drought,Heat,Lipopolysaccharide,Pectobacterium carotovorum,Phosphate-deficiency,Salt,Sulphur-deficiency	8	Cold,Drought,Heat,Lipopolysaccharide,Pectobacterium carotovorum,Phosphate-deficiency,Salt,Sulphur-deficiency	8	1	0.889272
ath-miR156c-5p	ath-miR156e	conserved	Land plants	conserved	Land plants	41	AT1G25500.2,AT1G25500.3,AT1G27360.1,AT1G27360.2,AT1G27360.3,AT1G27360.4,AT1G27370.1,AT1G27370.2,AT1G27370.3,AT1G27370.4,AT1G27370.5,AT1G27370.6,AT1G27370.7,AT1G53160.1,AT1G68960.2,AT1G69170.1,AT2G07718.1,AT2G17640.1,AT2G21840.1,AT2G21850.1,AT2G33810.1,AT2G37860.1,AT2G42200.1,AT3G02210.1,AT3G06250.2,AT3G06250.3,AT3G15270.1,AT3G28690.1,AT3G51910.1,AT3G57920.1,AT3G62420.1,AT4G35170.1,AT5G03140.1,AT5…	36	5	0	0.878049	0.121951	0	SS	miR156/157	conserved family	2	n	15	y	0.00706983	n	15	y	0.00706983	n	6	AT3G62420,AT3G28690,AT5G03140,AT3G06250,AT3G51910,AT2G33810	8	Cold,Drought,Heat,Lipopolysaccharide,Pectobacterium carotovorum,Phosphate-deficiency,Salt,Sulphur-deficiency	8	Cold,Drought,Heat,Lipopolysaccharide,Pectobacterium carotovorum,Phosphate-deficiency,Salt,Sulphur-deficiency	8	1	1
ath-miR156c-5p	ath-miR156f-5p	conserved	Land plants	conserved	Land plants	41	AT1G25500.2,AT1G25500.3,AT1G27360.1,AT1G27360.2,AT1G27360.3,AT1G27360.4,AT1G27370.1,AT1G27370.2,AT1G27370.3,AT1G27370.4,AT1G27370.5,AT1G27370.6,AT1G27370.7,AT1G53160.1,AT1G68960.2,AT1G69170.1,AT2G07718.1,AT2G17640.1,AT2G21840.1,AT2G21850.1,AT2G33810.1,AT2G37860.1,AT2G42200.1,AT3G02210.1,AT3G06250.2,AT3G06250.3,AT3G15270.1,AT3G28690.1,AT3G51910.1,AT3G57920.1,AT3G62420.1,AT4G35170.1,AT5G03140.1,AT5…	36	5	0	0.878049	0.121951	0	SS	miR156/157	conserved family	2	n	15	y	0.00706983	n	15	y	0.00706983	n	6	AT3G62420,AT3G28690,AT5G03140,AT3G06250,AT3G51910,AT2G33810	8	Cold,Drought,Heat,Lipopolysaccharide,Pectobacterium carotovorum,Phosphate-deficiency,Salt,Sulphur-deficiency	9	Brassinosteroid,Cold,Drought,Heat,Lipopolysaccharide,Pectobacterium carotovorum,Phosphate-deficiency,Salt,Sulphur-deficiency	8	1	1
ath-miR156c-5p	ath-miR156g	conserved	Land plants	conserved	Land plants	32	AT1G27360.1,AT1G27360.2,AT1G27360.3,AT1G27360.4,AT1G27370.1,AT1G27370.2,AT1G27370.3,AT1G27370.4,AT1G27370.5,AT1G27370.6,AT1G27370.7,AT1G53160.1,AT1G68960.2,AT1G69170.1,AT2G17640.1,AT2G21840.1,AT2G33810.1,AT2G42200.1,AT3G02210.1,AT3G15270.1,AT3G28690.1,AT3G57920.1,AT4G35170.1,AT5G03140.1,AT5G42040.1,AT5G43270.1,AT5G43270.2,AT5G43270.3,AT5G50570.1,AT5G50570.2,AT5G50670.1,AT5G50670.2	29	3	0	0.90625	0.09375	0	SS	miR156/157	conserved family	2	n	15	y	0.00706983	n	15	y	0.00706983	n	3	AT3G28690,AT5G03140,AT2G33810	8	Cold,Drought,Heat,Lipopolysaccharide,Pectobacterium carotovorum,Phosphate-deficiency,Salt,Sulphur-deficiency	9	Cold,Drought,Heat,Hypoxic stress,Lipopolysaccharide,Pectobacterium carotovorum,Phosphate-deficiency,Salt,Sulphur-deficiency	8	0.980307	0.991828
ath-miR156c-5p	ath-miR156h	conserved	Land plants	conserved	Vascular plants	27	AT1G27360.1,AT1G27360.2,AT1G27360.3,AT1G27360.4,AT1G27370.1,AT1G27370.2,AT1G27370.3,AT1G27370.4,AT1G27370.5,AT1G27370.6,AT1G27370.7,AT1G53160.1,AT1G69170.1,AT2G42200.1,AT3G06250.2,AT3G06250.3,AT3G15270.1,AT3G28690.1,AT3G51910.1,AT3G57920.1,AT5G43270.1,AT5G43270.2,AT5G43270.3,AT5G50570.1,AT5G50570.2,AT5G50670.1,AT5G50670.2	27	0	0	1	0	0	SS	miR156/157	conserved family	17.6833	n	15	y	0.00706983	n	16	y	0.0159535	y	3	AT3G28690,AT3G06250,AT3G51910	8	Cold,Drought,Heat,Lipopolysaccharide,Pectobacterium carotovorum,Phosphate-deficiency,Salt,Sulphur-deficiency	9	Cold,Drought,Heat,Lipopolysaccharide,Ozone,Pectobacterium carotovorum,Phosphate-deficiency,Salt,Sulphur-deficiency	8	0.770384	0.587761
ath-miR156c-5p	ath-miR156i	conserved	Land plants	conserved	Land plants	26	AT1G27360.1,AT1G27360.2,AT1G27360.3,AT1G27360.4,AT1G27370.1,AT1G27370.2,AT1G27370.3,AT1G27370.4,AT1G27370.5,AT1G27370.6,AT1G27370.7,AT1G53160.1,AT1G69170.1,AT2G17640.1,AT2G33810.1,AT2G42200.1,AT3G02210.1,AT3G15270.1,AT3G57920.1,AT5G43270.1,AT5G43270.2,AT5G43270.3,AT5G50570.1,AT5G50570.2,AT5G50670.1,AT5G50670.2	25	1	0	0.961538	0.0384615	0	SS	miR156/157	conserved family	2	n	15	y	0.00706983	n	15	y	0.00706983	n	1	AT2G33810	8	Cold,Drought,Heat,Lipopolysaccharide,Pectobacterium carotovorum,Phosphate-deficiency,Salt,Sulphur-deficiency	8	Cold,Drought,Heat,Lipopolysaccharide,Pectobacterium carotovorum,Phosphate-deficiency,Salt,Sulphur-deficiency	8	0.801807	-0.628552
ath-miR156c-5p	ath-miR156j	conserved	Land plants	conserved	Land plants	28	AT1G27360.1,AT1G27360.2,AT1G27360.3,AT1G27360.4,AT1G27370.1,AT1G27370.2,AT1G27370.3,AT1G27370.4,AT1G27370.5,AT1G27370.6,AT1G27370.7,AT1G53160.1,AT1G69170.1,AT2G07718.1,AT2G17640.1,AT2G33810.1,AT2G42200.1,AT3G15270.1,AT3G28690.1,AT3G57920.1,AT3G62420.1,AT5G43270.1,AT5G43270.2,AT5G43270.3,AT5G50570.1,AT5G50570.2,AT5G50670.1,AT5G50670.2	27	1	0	0.964286	0.0357143	0	SS	miR156/157	conserved family	13.1833	n	15	y	0.00706983	n	19	y	0.053095	y	3	AT3G62420,AT3G28690,AT2G33810	8	Cold,Drought,Heat,Lipopolysaccharide,Pectobacterium carotovorum,Phosphate-deficiency,Salt,Sulphur-deficiency	8	Cold,Drought,Heat,Lipopolysaccharide,Pectobacterium carotovorum,Phosphate-deficiency,Salt,Sulphur-deficiency	8	0.908426	0.966819
ath-miR156c-5p	ath-miR157a-5p	conserved	Land plants	conserved	Vascular plants	22	AT1G27360.1,AT1G27360.2,AT1G27360.3,AT1G27360.4,AT1G27370.1,AT1G27370.2,AT1G27370.3,AT1G27370.4,AT1G27370.5,AT1G27370.6,AT1G27370.7,AT1G53160.1,AT1G69170.1,AT2G42200.1,AT3G57920.1,AT5G43270.1,AT5G43270.2,AT5G43270.3,AT5G50570.1,AT5G50570.2,AT5G50670.1,AT5G50670.2	21	0	1	0.954545	0	0.0454545	SS	miR156/157	conserved family	41.6477	n	15	y	0.00706983	n	15	y	0.0303704	y	0		8	Cold,Drought,Heat,Lipopolysaccharide,Pectobacterium carotovorum,Phosphate-deficiency,Salt,Sulphur-deficiency	1	Cold	1	0.934174	0.882326
ath-miR156c-5p	ath-miR157b-5p	conserved	Land plants	conserved	Vascular plants	22	AT1G27360.1,AT1G27360.2,AT1G27360.3,AT1G27360.4,AT1G27370.1,AT1G27370.2,AT1G27370.3,AT1G27370.4,AT1G27370.5,AT1G27370.6,AT1G27370.7,AT1G53160.1,AT1G69170.1,AT2G42200.1,AT3G57920.1,AT5G43270.1,AT5G43270.2,AT5G43270.3,AT5G50570.1,AT5G50570.2,AT5G50670.1,AT5G50670.2	21	0	1	0.954545	0	0.0454545	SS	miR156/157	conserved family	41.6477	n	15	y	0.00706983	n	15	y	0.0303704	y	0		8	Cold,Drought,Heat,Lipopolysaccharide,Pectobacterium carotovorum,Phosphate-deficiency,Salt,Sulphur-deficiency	1	Cold	1	0.934174	0.882326
ath-miR156c-5p	ath-miR157c-5p	conserved	Land plants	conserved	Vascular plants	22	AT1G27360.1,AT1G27360.2,AT1G27360.3,AT1G27360.4,AT1G27370.1,AT1G27370.2,AT1G27370.3,AT1G27370.4,AT1G27370.5,AT1G27370.6,AT1G27370.7,AT1G53160.1,AT1G69170.1,AT2G42200.1,AT3G57920.1,AT5G43270.1,AT5G43270.2,AT5G43270.3,AT5G50570.1,AT5G50570.2,AT5G50670.1,AT5G50670.2	21	0	1	0.954545	0	0.0454545	SS	miR156/157	conserved family	41.6477	n	15	y	0.00706983	n	15	y	0.0303704	y	0		8	Cold,Drought,Heat,Lipopolysaccharide,Pectobacterium carotovorum,Phosphate-deficiency,Salt,Sulphur-deficiency	1	Cold	1	0.934174	0.882326
ath-miR156c-5p	ath-miR157d	conserved	Land plants	conserved	Vascular plants	23	AT1G27360.1,AT1G27360.2,AT1G27360.3,AT1G27360.4,AT1G27370.1,AT1G27370.2,AT1G27370.3,AT1G27370.4,AT1G27370.5,AT1G27370.6,AT1G27370.7,AT1G53160.1,AT1G69170.1,AT2G42200.1,AT3G15270.1,AT3G57920.1,AT5G43270.1,AT5G43270.2,AT5G43270.3,AT5G50570.1,AT5G50570.2,AT5G50670.1,AT5G50670.2	23	0	0	1	0	0	SS	miR156/157	conserved family	13.4084	n	15	y	0.00706983	n	15	y	0.00127722	n	0		8	Cold,Drought,Heat,Lipopolysaccharide,Pectobacterium carotovorum,Phosphate-deficiency,Salt,Sulphur-deficiency	2	Cold,Hypoxic stress	1	0.84611	-0.127261
ath-miR156c-5p	ath-miR5021	conserved	Land plants	non-conserved	Arabidopsis thaliana	1	AT2G33810.1	0	0	1	0	0	1	SD	interfamily		248.149	n	15	y	0.00706983	n	54	y	0.660861	y	1	AT2G33810	8	Cold,Drought,Heat,Lipopolysaccharide,Pectobacterium carotovorum,Phosphate-deficiency,Salt,Sulphur-deficiency	0		0	0.482114
ath-miR156c-5p	ath-miR5658	conserved	Land plants	non-conserved	Arabidopsis thaliana	2	AT1G27360.2,AT1G27360.4	0	0	2	0	0	1	SD	interfamily		77.1357	n	15	y	0.00706983	n	46	y	0.431559	y	0		8	Cold,Drought,Heat,Lipopolysaccharide,Pectobacterium carotovorum,Phosphate-deficiency,Salt,Sulphur-deficiency	0		0	0.499316	0.0421992
ath-miR156d-3p	ath-miR156f-3p	conserved	Brassicaceae	conserved	Flowering plants	1	AT1G72820.1	0	1	0	0	1	0	DD	miR156/157	conserved family	2	n	1	n	0	n	1	n	0	n	1	AT1G72820	8	Cold,Drought,Heat,Lipopolysaccharide,Pectobacterium carotovorum,Phosphate-deficiency,Salt,Sulphur-deficiency	8	Cold,Drought,Heat,Lipopolysaccharide,Pectobacterium carotovorum,Phosphate-deficiency,Salt,Sulphur-deficiency	8	0.403872	0.387599
ath-miR156d-5p	ath-miR156e	conserved	Land plants	conserved	Land plants	40	AT1G25500.2,AT1G25500.3,AT1G27360.1,AT1G27360.2,AT1G27360.3,AT1G27360.4,AT1G27370.1,AT1G27370.2,AT1G27370.3,AT1G27370.4,AT1G27370.5,AT1G27370.6,AT1G27370.7,AT1G53160.1,AT1G69170.1,AT2G07718.1,AT2G17640.1,AT2G21840.1,AT2G21850.1,AT2G33810.1,AT2G37860.1,AT2G42200.1,AT3G02210.1,AT3G06250.2,AT3G06250.3,AT3G15270.1,AT3G28690.1,AT3G51910.1,AT3G57920.1,AT3G62420.1,AT4G35170.1,AT5G03140.1,AT5G42040.1,AT5…	27	4	9	0.675	0.1	0.225	SS	miR156/157	conserved family	2	n	15	y	0.00706983	n	15	y	0.00706983	n	6	AT3G62420,AT3G28690,AT5G03140,AT3G06250,AT3G51910,AT2G33810	8	Cold,Drought,Heat,Lipopolysaccharide,Pectobacterium carotovorum,Phosphate-deficiency,Salt,Sulphur-deficiency	8	Cold,Drought,Heat,Lipopolysaccharide,Pectobacterium carotovorum,Phosphate-deficiency,Salt,Sulphur-deficiency	8	1	0.889272
ath-miR156d-5p	ath-miR156f-5p	conserved	Land plants	conserved	Land plants	40	AT1G25500.2,AT1G25500.3,AT1G27360.1,AT1G27360.2,AT1G27360.3,AT1G27360.4,AT1G27370.1,AT1G27370.2,AT1G27370.3,AT1G27370.4,AT1G27370.5,AT1G27370.6,AT1G27370.7,AT1G53160.1,AT1G69170.1,AT2G07718.1,AT2G17640.1,AT2G21840.1,AT2G21850.1,AT2G33810.1,AT2G37860.1,AT2G42200.1,AT3G02210.1,AT3G06250.2,AT3G06250.3,AT3G15270.1,AT3G28690.1,AT3G51910.1,AT3G57920.1,AT3G62420.1,AT4G35170.1,AT5G03140.1,AT5G42040.1,AT5…	27	4	9	0.675	0.1	0.225	SS	miR156/157	conserved family	2	n	15	y	0.00706983	n	15	y	0.00706983	n	6	AT3G62420,AT3G28690,AT5G03140,AT3G06250,AT3G51910,AT2G33810	8	Cold,Drought,Heat,Lipopolysaccharide,Pectobacterium carotovorum,Phosphate-deficiency,Salt,Sulphur-deficiency	9	Brassinosteroid,Cold,Drought,Heat,Lipopolysaccharide,Pectobacterium carotovorum,Phosphate-deficiency,Salt,Sulphur-deficiency	8	1	0.889272
ath-miR156d-5p	ath-miR156g	conserved	Land plants	conserved	Land plants	31	AT1G27360.1,AT1G27360.2,AT1G27360.3,AT1G27360.4,AT1G27370.1,AT1G27370.2,AT1G27370.3,AT1G27370.4,AT1G27370.5,AT1G27370.6,AT1G27370.7,AT1G53160.1,AT1G69170.1,AT2G17640.1,AT2G21840.1,AT2G33810.1,AT2G42200.1,AT3G02210.1,AT3G15270.1,AT3G28690.1,AT3G57920.1,AT4G35170.1,AT5G03140.1,AT5G42040.1,AT5G43270.1,AT5G43270.2,AT5G43270.3,AT5G50570.1,AT5G50570.2,AT5G50670.1,AT5G50670.2	26	2	3	0.83871	0.0645161	0.0967742	SS	miR156/157	conserved family	2	n	15	y	0.00706983	n	15	y	0.00706983	n	3	AT3G28690,AT5G03140,AT2G33810	8	Cold,Drought,Heat,Lipopolysaccharide,Pectobacterium carotovorum,Phosphate-deficiency,Salt,Sulphur-deficiency	9	Cold,Drought,Heat,Hypoxic stress,Lipopolysaccharide,Pectobacterium carotovorum,Phosphate-deficiency,Salt,Sulphur-deficiency	8	0.980307	0.862651
ath-miR156d-5p	ath-miR156h	conserved	Land plants	conserved	Vascular plants	27	AT1G27360.1,AT1G27360.2,AT1G27360.3,AT1G27360.4,AT1G27370.1,AT1G27370.2,AT1G27370.3,AT1G27370.4,AT1G27370.5,AT1G27370.6,AT1G27370.7,AT1G53160.1,AT1G69170.1,AT2G42200.1,AT3G06250.2,AT3G06250.3,AT3G15270.1,AT3G28690.1,AT3G51910.1,AT3G57920.1,AT5G43270.1,AT5G43270.2,AT5G43270.3,AT5G50570.1,AT5G50570.2,AT5G50670.1,AT5G50670.2	24	0	3	0.888889	0	0.111111	SS	miR156/157	conserved family	17.6833	n	15	y	0.00706983	n	16	y	0.0159535	y	3	AT3G28690,AT3G06250,AT3G51910	8	Cold,Drought,Heat,Lipopolysaccharide,Pectobacterium carotovorum,Phosphate-deficiency,Salt,Sulphur-deficiency	9	Cold,Drought,Heat,Lipopolysaccharide,Ozone,Pectobacterium carotovorum,Phosphate-deficiency,Salt,Sulphur-deficiency	8	0.770384	0.69094
ath-miR156d-5p	ath-miR156i	conserved	Land plants	conserved	Land plants	26	AT1G27360.1,AT1G27360.2,AT1G27360.3,AT1G27360.4,AT1G27370.1,AT1G27370.2,AT1G27370.3,AT1G27370.4,AT1G27370.5,AT1G27370.6,AT1G27370.7,AT1G53160.1,AT1G69170.1,AT2G17640.1,AT2G33810.1,AT2G42200.1,AT3G02210.1,AT3G15270.1,AT3G57920.1,AT5G43270.1,AT5G43270.2,AT5G43270.3,AT5G50570.1,AT5G50570.2,AT5G50670.1,AT5G50670.2	25	1	0	0.961538	0.0384615	0	SS	miR156/157	conserved family	2	n	15	y	0.00706983	n	15	y	0.00706983	n	1	AT2G33810	8	Cold,Drought,Heat,Lipopolysaccharide,Pectobacterium carotovorum,Phosphate-deficiency,Salt,Sulphur-deficiency	8	Cold,Drought,Heat,Lipopolysaccharide,Pectobacterium carotovorum,Phosphate-deficiency,Salt,Sulphur-deficiency	8	0.801807	-0.628552
ath-miR156d-5p	ath-miR156j	conserved	Land plants	conserved	Land plants	28	AT1G27360.1,AT1G27360.2,AT1G27360.3,AT1G27360.4,AT1G27370.1,AT1G27370.2,AT1G27370.3,AT1G27370.4,AT1G27370.5,AT1G27370.6,AT1G27370.7,AT1G53160.1,AT1G69170.1,AT2G07718.1,AT2G17640.1,AT2G33810.1,AT2G42200.1,AT3G15270.1,AT3G28690.1,AT3G57920.1,AT3G62420.1,AT5G43270.1,AT5G43270.2,AT5G43270.3,AT5G50570.1,AT5G50570.2,AT5G50670.1,AT5G50670.2	27	1	0	0.964286	0.0357143	0	SS	miR156/157	conserved family	13.1833	n	15	y	0.00706983	n	19	y	0.053095	y	3	AT3G62420,AT3G28690,AT2G33810	8	Cold,Drought,Heat,Lipopolysaccharide,Pectobacterium carotovorum,Phosphate-deficiency,Salt,Sulphur-deficiency	8	Cold,Drought,Heat,Lipopolysaccharide,Pectobacterium carotovorum,Phosphate-deficiency,Salt,Sulphur-deficiency	8	0.908426	0.913657
ath-miR156d-5p	ath-miR157a-5p	conserved	Land plants	conserved	Vascular plants	22	AT1G27360.1,AT1G27360.2,AT1G27360.3,AT1G27360.4,AT1G27370.1,AT1G27370.2,AT1G27370.3,AT1G27370.4,AT1G27370.5,AT1G27370.6,AT1G27370.7,AT1G53160.1,AT1G69170.1,AT2G42200.1,AT3G57920.1,AT5G43270.1,AT5G43270.2,AT5G43270.3,AT5G50570.1,AT5G50570.2,AT5G50670.1,AT5G50670.2	21	0	1	0.954545	0	0.0454545	SS	miR156/157	conserved family	41.6477	n	15	y	0.00706983	n	15	y	0.0303704	y	0		8	Cold,Drought,Heat,Lipopolysaccharide,Pectobacterium carotovorum,Phosphate-deficiency,Salt,Sulphur-deficiency	1	Cold	1	0.934174	0.930606
ath-miR156d-5p	ath-miR157b-5p	conserved	Land plants	conserved	Vascular plants	22	AT1G27360.1,AT1G27360.2,AT1G27360.3,AT1G27360.4,AT1G27370.1,AT1G27370.2,AT1G27370.3,AT1G27370.4,AT1G27370.5,AT1G27370.6,AT1G27370.7,AT1G53160.1,AT1G69170.1,AT2G42200.1,AT3G57920.1,AT5G43270.1,AT5G43270.2,AT5G43270.3,AT5G50570.1,AT5G50570.2,AT5G50670.1,AT5G50670.2	21	0	1	0.954545	0	0.0454545	SS	miR156/157	conserved family	41.6477	n	15	y	0.00706983	n	15	y	0.0303704	y	0		8	Cold,Drought,Heat,Lipopolysaccharide,Pectobacterium carotovorum,Phosphate-deficiency,Salt,Sulphur-deficiency	1	Cold	1	0.934174	0.930606
ath-miR156d-5p	ath-miR157c-5p	conserved	Land plants	conserved	Vascular plants	22	AT1G27360.1,AT1G27360.2,AT1G27360.3,AT1G27360.4,AT1G27370.1,AT1G27370.2,AT1G27370.3,AT1G27370.4,AT1G27370.5,AT1G27370.6,AT1G27370.7,AT1G53160.1,AT1G69170.1,AT2G42200.1,AT3G57920.1,AT5G43270.1,AT5G43270.2,AT5G43270.3,AT5G50570.1,AT5G50570.2,AT5G50670.1,AT5G50670.2	21	0	1	0.954545	0	0.0454545	SS	miR156/157	conserved family	41.6477	n	15	y	0.00706983	n	15	y	0.0303704	y	0		8	Cold,Drought,Heat,Lipopolysaccharide,Pectobacterium carotovorum,Phosphate-deficiency,Salt,Sulphur-deficiency	1	Cold	1	0.934174	0.930606
ath-miR156d-5p	ath-miR157d	conserved	Land plants	conserved	Vascular plants	23	AT1G27360.1,AT1G27360.2,AT1G27360.3,AT1G27360.4,AT1G27370.1,AT1G27370.2,AT1G27370.3,AT1G27370.4,AT1G27370.5,AT1G27370.6,AT1G27370.7,AT1G53160.1,AT1G69170.1,AT2G42200.1,AT3G15270.1,AT3G57920.1,AT5G43270.1,AT5G43270.2,AT5G43270.3,AT5G50570.1,AT5G50570.2,AT5G50670.1,AT5G50670.2	23	0	0	1	0	0	SS	miR156/157	conserved family	13.4084	n	15	y	0.00706983	n	15	y	0.00127722	n	0		8	Cold,Drought,Heat,Lipopolysaccharide,Pectobacterium carotovorum,Phosphate-deficiency,Salt,Sulphur-deficiency	2	Cold,Hypoxic stress	1	0.84611	0.490769
ath-miR156d-5p	ath-miR5021	conserved	Land plants	non-conserved	Arabidopsis thaliana	1	AT2G33810.1	0	0	1	0	0	1	SD	interfamily		248.149	n	15	y	0.00706983	n	54	y	0.660861	y	1	AT2G33810	8	Cold,Drought,Heat,Lipopolysaccharide,Pectobacterium carotovorum,Phosphate-deficiency,Salt,Sulphur-deficiency	0		0	0.482114
ath-miR156d-5p	ath-miR5658	conserved	Land plants	non-conserved	Arabidopsis thaliana	2	AT1G27360.2,AT1G27360.4	0	0	2	0	0	1	SD	interfamily		77.1357	n	15	y	0.00706983	n	46	y	0.431559	y	0		8	Cold,Drought,Heat,Lipopolysaccharide,Pectobacterium carotovorum,Phosphate-deficiency,Salt,Sulphur-deficiency	0		0	0.499316	0.150425
ath-miR156e	ath-miR156f-5p	conserved	Land plants	conserved	Land plants	41	AT1G25500.2,AT1G25500.3,AT1G27360.1,AT1G27360.2,AT1G27360.3,AT1G27360.4,AT1G27370.1,AT1G27370.2,AT1G27370.3,AT1G27370.4,AT1G27370.5,AT1G27370.6,AT1G27370.7,AT1G53160.1,AT1G68960.2,AT1G69170.1,AT2G07718.1,AT2G17640.1,AT2G21840.1,AT2G21850.1,AT2G33810.1,AT2G37860.1,AT2G42200.1,AT3G02210.1,AT3G06250.2,AT3G06250.3,AT3G15270.1,AT3G28690.1,AT3G51910.1,AT3G57920.1,AT3G62420.1,AT4G35170.1,AT5G03140.1,AT5…	36	5	0	0.878049	0.121951	0	SS	miR156/157	conserved family	2	n	15	y	0.00706983	n	15	y	0.00706983	n	6	AT3G62420,AT3G28690,AT5G03140,AT3G06250,AT3G51910,AT2G33810	8	Cold,Drought,Heat,Lipopolysaccharide,Pectobacterium carotovorum,Phosphate-deficiency,Salt,Sulphur-deficiency	9	Brassinosteroid,Cold,Drought,Heat,Lipopolysaccharide,Pectobacterium carotovorum,Phosphate-deficiency,Salt,Sulphur-deficiency	8	1	1
ath-miR156e	ath-miR156g	conserved	Land plants	conserved	Land plants	32	AT1G27360.1,AT1G27360.2,AT1G27360.3,AT1G27360.4,AT1G27370.1,AT1G27370.2,AT1G27370.3,AT1G27370.4,AT1G27370.5,AT1G27370.6,AT1G27370.7,AT1G53160.1,AT1G68960.2,AT1G69170.1,AT2G17640.1,AT2G21840.1,AT2G33810.1,AT2G42200.1,AT3G02210.1,AT3G15270.1,AT3G28690.1,AT3G57920.1,AT4G35170.1,AT5G03140.1,AT5G42040.1,AT5G43270.1,AT5G43270.2,AT5G43270.3,AT5G50570.1,AT5G50570.2,AT5G50670.1,AT5G50670.2	29	3	0	0.90625	0.09375	0	SS	miR156/157	conserved family	2	n	15	y	0.00706983	n	15	y	0.00706983	n	3	AT3G28690,AT5G03140,AT2G33810	8	Cold,Drought,Heat,Lipopolysaccharide,Pectobacterium carotovorum,Phosphate-deficiency,Salt,Sulphur-deficiency	9	Cold,Drought,Heat,Hypoxic stress,Lipopolysaccharide,Pectobacterium carotovorum,Phosphate-deficiency,Salt,Sulphur-deficiency	8	0.980307	0.991828
ath-miR156e	ath-miR156h	conserved	Land plants	conserved	Vascular plants	27	AT1G27360.1,AT1G27360.2,AT1G27360.3,AT1G27360.4,AT1G27370.1,AT1G27370.2,AT1G27370.3,AT1G27370.4,AT1G27370.5,AT1G27370.6,AT1G27370.7,AT1G53160.1,AT1G69170.1,AT2G42200.1,AT3G06250.2,AT3G06250.3,AT3G15270.1,AT3G28690.1,AT3G51910.1,AT3G57920.1,AT5G43270.1,AT5G43270.2,AT5G43270.3,AT5G50570.1,AT5G50570.2,AT5G50670.1,AT5G50670.2	27	0	0	1	0	0	SS	miR156/157	conserved family	17.6833	n	15	y	0.00706983	n	16	y	0.0159535	y	3	AT3G28690,AT3G06250,AT3G51910	8	Cold,Drought,Heat,Lipopolysaccharide,Pectobacterium carotovorum,Phosphate-deficiency,Salt,Sulphur-deficiency	9	Cold,Drought,Heat,Lipopolysaccharide,Ozone,Pectobacterium carotovorum,Phosphate-deficiency,Salt,Sulphur-deficiency	8	0.770384	0.587761
ath-miR156e	ath-miR156i	conserved	Land plants	conserved	Land plants	26	AT1G27360.1,AT1G27360.2,AT1G27360.3,AT1G27360.4,AT1G27370.1,AT1G27370.2,AT1G27370.3,AT1G27370.4,AT1G27370.5,AT1G27370.6,AT1G27370.7,AT1G53160.1,AT1G69170.1,AT2G17640.1,AT2G33810.1,AT2G42200.1,AT3G02210.1,AT3G15270.1,AT3G57920.1,AT5G43270.1,AT5G43270.2,AT5G43270.3,AT5G50570.1,AT5G50570.2,AT5G50670.1,AT5G50670.2	25	1	0	0.961538	0.0384615	0	SS	miR156/157	conserved family	2	n	15	y	0.00706983	n	15	y	0.00706983	n	1	AT2G33810	8	Cold,Drought,Heat,Lipopolysaccharide,Pectobacterium carotovorum,Phosphate-deficiency,Salt,Sulphur-deficiency	8	Cold,Drought,Heat,Lipopolysaccharide,Pectobacterium carotovorum,Phosphate-deficiency,Salt,Sulphur-deficiency	8	0.801807	-0.628552
ath-miR156e	ath-miR156j	conserved	Land plants	conserved	Land plants	28	AT1G27360.1,AT1G27360.2,AT1G27360.3,AT1G27360.4,AT1G27370.1,AT1G27370.2,AT1G27370.3,AT1G27370.4,AT1G27370.5,AT1G27370.6,AT1G27370.7,AT1G53160.1,AT1G69170.1,AT2G07718.1,AT2G17640.1,AT2G33810.1,AT2G42200.1,AT3G15270.1,AT3G28690.1,AT3G57920.1,AT3G62420.1,AT5G43270.1,AT5G43270.2,AT5G43270.3,AT5G50570.1,AT5G50570.2,AT5G50670.1,AT5G50670.2	27	1	0	0.964286	0.0357143	0	SS	miR156/157	conserved family	13.1833	n	15	y	0.00706983	n	19	y	0.053095	y	3	AT3G62420,AT3G28690,AT2G33810	8	Cold,Drought,Heat,Lipopolysaccharide,Pectobacterium carotovorum,Phosphate-deficiency,Salt,Sulphur-deficiency	8	Cold,Drought,Heat,Lipopolysaccharide,Pectobacterium carotovorum,Phosphate-deficiency,Salt,Sulphur-deficiency	8	0.908426	0.966819
ath-miR156e	ath-miR157a-5p	conserved	Land plants	conserved	Vascular plants	22	AT1G27360.1,AT1G27360.2,AT1G27360.3,AT1G27360.4,AT1G27370.1,AT1G27370.2,AT1G27370.3,AT1G27370.4,AT1G27370.5,AT1G27370.6,AT1G27370.7,AT1G53160.1,AT1G69170.1,AT2G42200.1,AT3G57920.1,AT5G43270.1,AT5G43270.2,AT5G43270.3,AT5G50570.1,AT5G50570.2,AT5G50670.1,AT5G50670.2	21	0	1	0.954545	0	0.0454545	SS	miR156/157	conserved family	41.6477	n	15	y	0.00706983	n	15	y	0.0303704	y	0		8	Cold,Drought,Heat,Lipopolysaccharide,Pectobacterium carotovorum,Phosphate-deficiency,Salt,Sulphur-deficiency	1	Cold	1	0.934174	0.882326
ath-miR156e	ath-miR157b-5p	conserved	Land plants	conserved	Vascular plants	22	AT1G27360.1,AT1G27360.2,AT1G27360.3,AT1G27360.4,AT1G27370.1,AT1G27370.2,AT1G27370.3,AT1G27370.4,AT1G27370.5,AT1G27370.6,AT1G27370.7,AT1G53160.1,AT1G69170.1,AT2G42200.1,AT3G57920.1,AT5G43270.1,AT5G43270.2,AT5G43270.3,AT5G50570.1,AT5G50570.2,AT5G50670.1,AT5G50670.2	21	0	1	0.954545	0	0.0454545	SS	miR156/157	conserved family	41.6477	n	15	y	0.00706983	n	15	y	0.0303704	y	0		8	Cold,Drought,Heat,Lipopolysaccharide,Pectobacterium carotovorum,Phosphate-deficiency,Salt,Sulphur-deficiency	1	Cold	1	0.934174	0.882326
ath-miR156e	ath-miR157c-5p	conserved	Land plants	conserved	Vascular plants	22	AT1G27360.1,AT1G27360.2,AT1G27360.3,AT1G27360.4,AT1G27370.1,AT1G27370.2,AT1G27370.3,AT1G27370.4,AT1G27370.5,AT1G27370.6,AT1G27370.7,AT1G53160.1,AT1G69170.1,AT2G42200.1,AT3G57920.1,AT5G43270.1,AT5G43270.2,AT5G43270.3,AT5G50570.1,AT5G50570.2,AT5G50670.1,AT5G50670.2	21	0	1	0.954545	0	0.0454545	SS	miR156/157	conserved family	41.6477	n	15	y	0.00706983	n	15	y	0.0303704	y	0		8	Cold,Drought,Heat,Lipopolysaccharide,Pectobacterium carotovorum,Phosphate-deficiency,Salt,Sulphur-deficiency	1	Cold	1	0.934174	0.882326
ath-miR156e	ath-miR157d	conserved	Land plants	conserved	Vascular plants	23	AT1G27360.1,AT1G27360.2,AT1G27360.3,AT1G27360.4,AT1G27370.1,AT1G27370.2,AT1G27370.3,AT1G27370.4,AT1G27370.5,AT1G27370.6,AT1G27370.7,AT1G53160.1,AT1G69170.1,AT2G42200.1,AT3G15270.1,AT3G57920.1,AT5G43270.1,AT5G43270.2,AT5G43270.3,AT5G50570.1,AT5G50570.2,AT5G50670.1,AT5G50670.2	23	0	0	1	0	0	SS	miR156/157	conserved family	13.4084	n	15	y	0.00706983	n	15	y	0.00127722	n	0		8	Cold,Drought,Heat,Lipopolysaccharide,Pectobacterium carotovorum,Phosphate-deficiency,Salt,Sulphur-deficiency	2	Cold,Hypoxic stress	1	0.84611	-0.127261
ath-miR156e	ath-miR5021	conserved	Land plants	non-conserved	Arabidopsis thaliana	1	AT2G33810.1	0	0	1	0	0	1	SD	interfamily		248.149	n	15	y	0.00706983	n	54	y	0.660861	y	1	AT2G33810	8	Cold,Drought,Heat,Lipopolysaccharide,Pectobacterium carotovorum,Phosphate-deficiency,Salt,Sulphur-deficiency	0		0	0.482114
ath-miR156e	ath-miR5658	conserved	Land plants	non-conserved	Arabidopsis thaliana	2	AT1G27360.2,AT1G27360.4	0	0	2	0	0	1	SD	interfamily		77.1357	n	15	y	0.00706983	n	46	y	0.431559	y	0		8	Cold,Drought,Heat,Lipopolysaccharide,Pectobacterium carotovorum,Phosphate-deficiency,Salt,Sulphur-deficiency	0		0	0.499316	0.0421992
ath-miR156f-5p	ath-miR156g	conserved	Land plants	conserved	Land plants	32	AT1G27360.1,AT1G27360.2,AT1G27360.3,AT1G27360.4,AT1G27370.1,AT1G27370.2,AT1G27370.3,AT1G27370.4,AT1G27370.5,AT1G27370.6,AT1G27370.7,AT1G53160.1,AT1G68960.2,AT1G69170.1,AT2G17640.1,AT2G21840.1,AT2G33810.1,AT2G42200.1,AT3G02210.1,AT3G15270.1,AT3G28690.1,AT3G57920.1,AT4G35170.1,AT5G03140.1,AT5G42040.1,AT5G43270.1,AT5G43270.2,AT5G43270.3,AT5G50570.1,AT5G50570.2,AT5G50670.1,AT5G50670.2	29	3	0	0.90625	0.09375	0	SS	miR156/157	conserved family	2	n	15	y	0.00706983	n	15	y	0.00706983	n	3	AT3G28690,AT5G03140,AT2G33810	9	Brassinosteroid,Cold,Drought,Heat,Lipopolysaccharide,Pectobacterium carotovorum,Phosphate-deficiency,Salt,Sulphur-deficiency	9	Cold,Drought,Heat,Hypoxic stress,Lipopolysaccharide,Pectobacterium carotovorum,Phosphate-deficiency,Salt,Sulphur-deficiency	8	0.980307	0.991828
ath-miR156f-5p	ath-miR156h	conserved	Land plants	conserved	Vascular plants	27	AT1G27360.1,AT1G27360.2,AT1G27360.3,AT1G27360.4,AT1G27370.1,AT1G27370.2,AT1G27370.3,AT1G27370.4,AT1G27370.5,AT1G27370.6,AT1G27370.7,AT1G53160.1,AT1G69170.1,AT2G42200.1,AT3G06250.2,AT3G06250.3,AT3G15270.1,AT3G28690.1,AT3G51910.1,AT3G57920.1,AT5G43270.1,AT5G43270.2,AT5G43270.3,AT5G50570.1,AT5G50570.2,AT5G50670.1,AT5G50670.2	27	0	0	1	0	0	SS	miR156/157	conserved family	17.6833	n	15	y	0.00706983	n	16	y	0.0159535	y	3	AT3G28690,AT3G06250,AT3G51910	9	Brassinosteroid,Cold,Drought,Heat,Lipopolysaccharide,Pectobacterium carotovorum,Phosphate-deficiency,Salt,Sulphur-deficiency	9	Cold,Drought,Heat,Lipopolysaccharide,Ozone,Pectobacterium carotovorum,Phosphate-deficiency,Salt,Sulphur-deficiency	8	0.770384	0.587761
ath-miR156f-5p	ath-miR156i	conserved	Land plants	conserved	Land plants	26	AT1G27360.1,AT1G27360.2,AT1G27360.3,AT1G27360.4,AT1G27370.1,AT1G27370.2,AT1G27370.3,AT1G27370.4,AT1G27370.5,AT1G27370.6,AT1G27370.7,AT1G53160.1,AT1G69170.1,AT2G17640.1,AT2G33810.1,AT2G42200.1,AT3G02210.1,AT3G15270.1,AT3G57920.1,AT5G43270.1,AT5G43270.2,AT5G43270.3,AT5G50570.1,AT5G50570.2,AT5G50670.1,AT5G50670.2	25	1	0	0.961538	0.0384615	0	SS	miR156/157	conserved family	2	n	15	y	0.00706983	n	15	y	0.00706983	n	1	AT2G33810	9	Brassinosteroid,Cold,Drought,Heat,Lipopolysaccharide,Pectobacterium carotovorum,Phosphate-deficiency,Salt,Sulphur-deficiency	8	Cold,Drought,Heat,Lipopolysaccharide,Pectobacterium carotovorum,Phosphate-deficiency,Salt,Sulphur-deficiency	8	0.801807	-0.628552
ath-miR156f-5p	ath-miR156j	conserved	Land plants	conserved	Land plants	28	AT1G27360.1,AT1G27360.2,AT1G27360.3,AT1G27360.4,AT1G27370.1,AT1G27370.2,AT1G27370.3,AT1G27370.4,AT1G27370.5,AT1G27370.6,AT1G27370.7,AT1G53160.1,AT1G69170.1,AT2G07718.1,AT2G17640.1,AT2G33810.1,AT2G42200.1,AT3G15270.1,AT3G28690.1,AT3G57920.1,AT3G62420.1,AT5G43270.1,AT5G43270.2,AT5G43270.3,AT5G50570.1,AT5G50570.2,AT5G50670.1,AT5G50670.2	27	1	0	0.964286	0.0357143	0	SS	miR156/157	conserved family	13.1833	n	15	y	0.00706983	n	19	y	0.053095	y	3	AT3G62420,AT3G28690,AT2G33810	9	Brassinosteroid,Cold,Drought,Heat,Lipopolysaccharide,Pectobacterium carotovorum,Phosphate-deficiency,Salt,Sulphur-deficiency	8	Cold,Drought,Heat,Lipopolysaccharide,Pectobacterium carotovorum,Phosphate-deficiency,Salt,Sulphur-deficiency	8	0.908426	0.966819
ath-miR156f-5p	ath-miR157a-5p	conserved	Land plants	conserved	Vascular plants	22	AT1G27360.1,AT1G27360.2,AT1G27360.3,AT1G27360.4,AT1G27370.1,AT1G27370.2,AT1G27370.3,AT1G27370.4,AT1G27370.5,AT1G27370.6,AT1G27370.7,AT1G53160.1,AT1G69170.1,AT2G42200.1,AT3G57920.1,AT5G43270.1,AT5G43270.2,AT5G43270.3,AT5G50570.1,AT5G50570.2,AT5G50670.1,AT5G50670.2	21	0	1	0.954545	0	0.0454545	SS	miR156/157	conserved family	41.6477	n	15	y	0.00706983	n	15	y	0.0303704	y	0		9	Brassinosteroid,Cold,Drought,Heat,Lipopolysaccharide,Pectobacterium carotovorum,Phosphate-deficiency,Salt,Sulphur-deficiency	1	Cold	1	0.934174	0.882326
ath-miR156f-5p	ath-miR157b-5p	conserved	Land plants	conserved	Vascular plants	22	AT1G27360.1,AT1G27360.2,AT1G27360.3,AT1G27360.4,AT1G27370.1,AT1G27370.2,AT1G27370.3,AT1G27370.4,AT1G27370.5,AT1G27370.6,AT1G27370.7,AT1G53160.1,AT1G69170.1,AT2G42200.1,AT3G57920.1,AT5G43270.1,AT5G43270.2,AT5G43270.3,AT5G50570.1,AT5G50570.2,AT5G50670.1,AT5G50670.2	21	0	1	0.954545	0	0.0454545	SS	miR156/157	conserved family	41.6477	n	15	y	0.00706983	n	15	y	0.0303704	y	0		9	Brassinosteroid,Cold,Drought,Heat,Lipopolysaccharide,Pectobacterium carotovorum,Phosphate-deficiency,Salt,Sulphur-deficiency	1	Cold	1	0.934174	0.882326
ath-miR156f-5p	ath-miR157c-5p	conserved	Land plants	conserved	Vascular plants	22	AT1G27360.1,AT1G27360.2,AT1G27360.3,AT1G27360.4,AT1G27370.1,AT1G27370.2,AT1G27370.3,AT1G27370.4,AT1G27370.5,AT1G27370.6,AT1G27370.7,AT1G53160.1,AT1G69170.1,AT2G42200.1,AT3G57920.1,AT5G43270.1,AT5G43270.2,AT5G43270.3,AT5G50570.1,AT5G50570.2,AT5G50670.1,AT5G50670.2	21	0	1	0.954545	0	0.0454545	SS	miR156/157	conserved family	41.6477	n	15	y	0.00706983	n	15	y	0.0303704	y	0		9	Brassinosteroid,Cold,Drought,Heat,Lipopolysaccharide,Pectobacterium carotovorum,Phosphate-deficiency,Salt,Sulphur-deficiency	1	Cold	1	0.934174	0.882326
ath-miR156f-5p	ath-miR157d	conserved	Land plants	conserved	Vascular plants	23	AT1G27360.1,AT1G27360.2,AT1G27360.3,AT1G27360.4,AT1G27370.1,AT1G27370.2,AT1G27370.3,AT1G27370.4,AT1G27370.5,AT1G27370.6,AT1G27370.7,AT1G53160.1,AT1G69170.1,AT2G42200.1,AT3G15270.1,AT3G57920.1,AT5G43270.1,AT5G43270.2,AT5G43270.3,AT5G50570.1,AT5G50570.2,AT5G50670.1,AT5G50670.2	23	0	0	1	0	0	SS	miR156/157	conserved family	13.4084	n	15	y	0.00706983	n	15	y	0.00127722	n	0		9	Brassinosteroid,Cold,Drought,Heat,Lipopolysaccharide,Pectobacterium carotovorum,Phosphate-deficiency,Salt,Sulphur-deficiency	2	Cold,Hypoxic stress	1	0.84611	-0.127261
ath-miR156f-5p	ath-miR5021	conserved	Land plants	non-conserved	Arabidopsis thaliana	1	AT2G33810.1	0	0	1	0	0	1	SD	interfamily		248.149	n	15	y	0.00706983	n	54	y	0.660861	y	1	AT2G33810	9	Brassinosteroid,Cold,Drought,Heat,Lipopolysaccharide,Pectobacterium carotovorum,Phosphate-deficiency,Salt,Sulphur-deficiency	0		0	0.482114
ath-miR156f-5p	ath-miR5658	conserved	Land plants	non-conserved	Arabidopsis thaliana	2	AT1G27360.2,AT1G27360.4	0	0	2	0	0	1	SD	interfamily		77.1357	n	15	y	0.00706983	n	46	y	0.431559	y	0		9	Brassinosteroid,Cold,Drought,Heat,Lipopolysaccharide,Pectobacterium carotovorum,Phosphate-deficiency,Salt,Sulphur-deficiency	0		0	0.499316	0.0421992
ath-miR156g	ath-miR156h	conserved	Land plants	conserved	Vascular plants	24	AT1G27360.1,AT1G27360.2,AT1G27360.3,AT1G27360.4,AT1G27370.1,AT1G27370.2,AT1G27370.3,AT1G27370.4,AT1G27370.5,AT1G27370.6,AT1G27370.7,AT1G53160.1,AT1G69170.1,AT2G42200.1,AT3G15270.1,AT3G28690.1,AT3G57920.1,AT5G43270.1,AT5G43270.2,AT5G43270.3,AT5G50570.1,AT5G50570.2,AT5G50670.1,AT5G50670.2	24	0	0	1	0	0	SS	miR156/157	conserved family	17.6833	n	15	y	0.00706983	n	16	y	0.0159535	y	1	AT3G28690	9	Cold,Drought,Heat,Hypoxic stress,Lipopolysaccharide,Pectobacterium carotovorum,Phosphate-deficiency,Salt,Sulphur-deficiency	9	Cold,Drought,Heat,Lipopolysaccharide,Ozone,Pectobacterium carotovorum,Phosphate-deficiency,Salt,Sulphur-deficiency	8	0.74668	0.659879
ath-miR156g	ath-miR156i	conserved	Land plants	conserved	Land plants	26	AT1G27360.1,AT1G27360.2,AT1G27360.3,AT1G27360.4,AT1G27370.1,AT1G27370.2,AT1G27370.3,AT1G27370.4,AT1G27370.5,AT1G27370.6,AT1G27370.7,AT1G53160.1,AT1G69170.1,AT2G17640.1,AT2G33810.1,AT2G42200.1,AT3G02210.1,AT3G15270.1,AT3G57920.1,AT5G43270.1,AT5G43270.2,AT5G43270.3,AT5G50570.1,AT5G50570.2,AT5G50670.1,AT5G50670.2	25	1	0	0.961538	0.0384615	0	SS	miR156/157	conserved family	2	n	15	y	0.00706983	n	15	y	0.00706983	n	1	AT2G33810	9	Cold,Drought,Heat,Hypoxic stress,Lipopolysaccharide,Pectobacterium carotovorum,Phosphate-deficiency,Salt,Sulphur-deficiency	8	Cold,Drought,Heat,Lipopolysaccharide,Pectobacterium carotovorum,Phosphate-deficiency,Salt,Sulphur-deficiency	8	0.737479	-0.196747
ath-miR156g	ath-miR156j	conserved	Land plants	conserved	Land plants	26	AT1G27360.1,AT1G27360.2,AT1G27360.3,AT1G27360.4,AT1G27370.1,AT1G27370.2,AT1G27370.3,AT1G27370.4,AT1G27370.5,AT1G27370.6,AT1G27370.7,AT1G53160.1,AT1G69170.1,AT2G17640.1,AT2G33810.1,AT2G42200.1,AT3G15270.1,AT3G28690.1,AT3G57920.1,AT5G43270.1,AT5G43270.2,AT5G43270.3,AT5G50570.1,AT5G50570.2,AT5G50670.1,AT5G50670.2	26	0	0	1	0	0	SS	miR156/157	conserved family	13.1833	n	15	y	0.00706983	n	19	y	0.053095	y	2	AT3G28690,AT2G33810	9	Cold,Drought,Heat,Hypoxic stress,Lipopolysaccharide,Pectobacterium carotovorum,Phosphate-deficiency,Salt,Sulphur-deficiency	8	Cold,Drought,Heat,Lipopolysaccharide,Pectobacterium carotovorum,Phosphate-deficiency,Salt,Sulphur-deficiency	8	0.878675	0.969618
ath-miR156g	ath-miR157a-5p	conserved	Land plants	conserved	Vascular plants	22	AT1G27360.1,AT1G27360.2,AT1G27360.3,AT1G27360.4,AT1G27370.1,AT1G27370.2,AT1G27370.3,AT1G27370.4,AT1G27370.5,AT1G27370.6,AT1G27370.7,AT1G53160.1,AT1G69170.1,AT2G42200.1,AT3G57920.1,AT5G43270.1,AT5G43270.2,AT5G43270.3,AT5G50570.1,AT5G50570.2,AT5G50670.1,AT5G50670.2	21	0	1	0.954545	0	0.0454545	SS	miR156/157	conserved family	41.6477	n	15	y	0.00706983	n	15	y	0.0303704	y	0		9	Cold,Drought,Heat,Hypoxic stress,Lipopolysaccharide,Pectobacterium carotovorum,Phosphate-deficiency,Salt,Sulphur-deficiency	1	Cold	1	0.938794	0.857789
ath-miR156g	ath-miR157b-5p	conserved	Land plants	conserved	Vascular plants	22	AT1G27360.1,AT1G27360.2,AT1G27360.3,AT1G27360.4,AT1G27370.1,AT1G27370.2,AT1G27370.3,AT1G27370.4,AT1G27370.5,AT1G27370.6,AT1G27370.7,AT1G53160.1,AT1G69170.1,AT2G42200.1,AT3G57920.1,AT5G43270.1,AT5G43270.2,AT5G43270.3,AT5G50570.1,AT5G50570.2,AT5G50670.1,AT5G50670.2	21	0	1	0.954545	0	0.0454545	SS	miR156/157	conserved family	41.6477	n	15	y	0.00706983	n	15	y	0.0303704	y	0		9	Cold,Drought,Heat,Hypoxic stress,Lipopolysaccharide,Pectobacterium carotovorum,Phosphate-deficiency,Salt,Sulphur-deficiency	1	Cold	1	0.938794	0.857789
ath-miR156g	ath-miR157c-5p	conserved	Land plants	conserved	Vascular plants	22	AT1G27360.1,AT1G27360.2,AT1G27360.3,AT1G27360.4,AT1G27370.1,AT1G27370.2,AT1G27370.3,AT1G27370.4,AT1G27370.5,AT1G27370.6,AT1G27370.7,AT1G53160.1,AT1G69170.1,AT2G42200.1,AT3G57920.1,AT5G43270.1,AT5G43270.2,AT5G43270.3,AT5G50570.1,AT5G50570.2,AT5G50670.1,AT5G50670.2	21	0	1	0.954545	0	0.0454545	SS	miR156/157	conserved family	41.6477	n	15	y	0.00706983	n	15	y	0.0303704	y	0		9	Cold,Drought,Heat,Hypoxic stress,Lipopolysaccharide,Pectobacterium carotovorum,Phosphate-deficiency,Salt,Sulphur-deficiency	1	Cold	1	0.938794	0.857789
ath-miR156g	ath-miR157d	conserved	Land plants	conserved	Vascular plants	23	AT1G27360.1,AT1G27360.2,AT1G27360.3,AT1G27360.4,AT1G27370.1,AT1G27370.2,AT1G27370.3,AT1G27370.4,AT1G27370.5,AT1G27370.6,AT1G27370.7,AT1G53160.1,AT1G69170.1,AT2G42200.1,AT3G15270.1,AT3G57920.1,AT5G43270.1,AT5G43270.2,AT5G43270.3,AT5G50570.1,AT5G50570.2,AT5G50670.1,AT5G50670.2	23	0	0	1	0	0	SS	miR156/157	conserved family	13.4084	n	15	y	0.00706983	n	15	y	0.00127722	n	0		9	Cold,Drought,Heat,Hypoxic stress,Lipopolysaccharide,Pectobacterium carotovorum,Phosphate-deficiency,Salt,Sulphur-deficiency	2	Cold,Hypoxic stress	2	0.848511	-0.279071
ath-miR156g	ath-miR5021	conserved	Land plants	non-conserved	Arabidopsis thaliana	1	AT2G33810.1	0	0	1	0	0	1	SD	interfamily		248.149	n	15	y	0.00706983	n	54	y	0.660861	y	1	AT2G33810	9	Cold,Drought,Heat,Hypoxic stress,Lipopolysaccharide,Pectobacterium carotovorum,Phosphate-deficiency,Salt,Sulphur-deficiency	0		0	0.455116
ath-miR156g	ath-miR5658	conserved	Land plants	non-conserved	Arabidopsis thaliana	2	AT1G27360.2,AT1G27360.4	0	0	2	0	0	1	SD	interfamily		77.1357	n	15	y	0.00706983	n	46	y	0.431559	y	0		9	Cold,Drought,Heat,Hypoxic stress,Lipopolysaccharide,Pectobacterium carotovorum,Phosphate-deficiency,Salt,Sulphur-deficiency	0		0	0.462162	-0.0210459
ath-miR156h	ath-miR156i	conserved	Vascular plants	conserved	Land plants	29	AT1G13560.1,AT1G13560.2,AT1G27360.1,AT1G27360.2,AT1G27360.3,AT1G27360.4,AT1G27370.1,AT1G27370.2,AT1G27370.3,AT1G27370.4,AT1G27370.5,AT1G27370.6,AT1G27370.7,AT1G53160.1,AT1G69170.1,AT2G28605.1,AT2G42200.1,AT2G47590.1,AT3G15270.1,AT3G17340.1,AT3G17340.2,AT3G57920.1,AT5G43270.1,AT5G43270.2,AT5G43270.3,AT5G50570.1,AT5G50570.2,AT5G50670.1,AT5G50670.2	25	2	2	0.862069	0.0689655	0.0689655	SS	miR156/157	conserved family	17.6833	n	16	y	0.0159535	y	15	y	0.00706983	n	2	AT2G47590,AT1G13560	9	Cold,Drought,Heat,Lipopolysaccharide,Ozone,Pectobacterium carotovorum,Phosphate-deficiency,Salt,Sulphur-deficiency	8	Cold,Drought,Heat,Lipopolysaccharide,Pectobacterium carotovorum,Phosphate-deficiency,Salt,Sulphur-deficiency	8	0.756497	0.774434
ath-miR156h	ath-miR156j	conserved	Vascular plants	conserved	Land plants	35	AT1G22000.1,AT1G26890.1,AT1G26890.2,AT1G26890.3,AT1G26890.4,AT1G26890.5,AT1G27360.1,AT1G27360.2,AT1G27360.3,AT1G27360.4,AT1G27370.1,AT1G27370.2,AT1G27370.3,AT1G27370.4,AT1G27370.5,AT1G27370.6,AT1G27370.7,AT1G44050.1,AT1G53160.1,AT1G67040.1,AT1G67040.2,AT1G69170.1,AT2G28605.1,AT2G42200.1,AT3G15270.1,AT3G28690.1,AT3G57920.1,AT5G42040.1,AT5G43270.1,AT5G43270.2,AT5G43270.3,AT5G50570.1,AT5G50570.2,AT5…	32	2	1	0.914286	0.0571429	0.0285714	SS	miR156/157	conserved family	14.5	n	16	y	0.0159535	y	19	y	0.053095	y	2	AT3G28690,AT1G44050	9	Cold,Drought,Heat,Lipopolysaccharide,Ozone,Pectobacterium carotovorum,Phosphate-deficiency,Salt,Sulphur-deficiency	8	Cold,Drought,Heat,Lipopolysaccharide,Pectobacterium carotovorum,Phosphate-deficiency,Salt,Sulphur-deficiency	8	0.834108	0.688799
ath-miR156h	ath-miR157a-5p	conserved	Vascular plants	conserved	Vascular plants	23	AT1G22000.1,AT1G27360.1,AT1G27360.2,AT1G27360.3,AT1G27360.4,AT1G27370.1,AT1G27370.2,AT1G27370.3,AT1G27370.4,AT1G27370.5,AT1G27370.6,AT1G27370.7,AT1G53160.1,AT1G69170.1,AT2G42200.1,AT3G57920.1,AT5G43270.1,AT5G43270.2,AT5G43270.3,AT5G50570.1,AT5G50570.2,AT5G50670.1,AT5G50670.2	21	0	2	0.913043	0	0.0869565	SS	miR156/157	conserved family	34.1654	n	16	y	0.0159535	y	15	y	0.0303704	y	0		9	Cold,Drought,Heat,Lipopolysaccharide,Ozone,Pectobacterium carotovorum,Phosphate-deficiency,Salt,Sulphur-deficiency	1	Cold	1	0.805828	0.602782
ath-miR156h	ath-miR157b-5p	conserved	Vascular plants	conserved	Vascular plants	23	AT1G22000.1,AT1G27360.1,AT1G27360.2,AT1G27360.3,AT1G27360.4,AT1G27370.1,AT1G27370.2,AT1G27370.3,AT1G27370.4,AT1G27370.5,AT1G27370.6,AT1G27370.7,AT1G53160.1,AT1G69170.1,AT2G42200.1,AT3G57920.1,AT5G43270.1,AT5G43270.2,AT5G43270.3,AT5G50570.1,AT5G50570.2,AT5G50670.1,AT5G50670.2	21	0	2	0.913043	0	0.0869565	SS	miR156/157	conserved family	34.1654	n	16	y	0.0159535	y	15	y	0.0303704	y	0		9	Cold,Drought,Heat,Lipopolysaccharide,Ozone,Pectobacterium carotovorum,Phosphate-deficiency,Salt,Sulphur-deficiency	1	Cold	1	0.805828	0.602782
ath-miR156h	ath-miR157c-5p	conserved	Vascular plants	conserved	Vascular plants	23	AT1G22000.1,AT1G27360.1,AT1G27360.2,AT1G27360.3,AT1G27360.4,AT1G27370.1,AT1G27370.2,AT1G27370.3,AT1G27370.4,AT1G27370.5,AT1G27370.6,AT1G27370.7,AT1G53160.1,AT1G69170.1,AT2G42200.1,AT3G57920.1,AT5G43270.1,AT5G43270.2,AT5G43270.3,AT5G50570.1,AT5G50570.2,AT5G50670.1,AT5G50670.2	21	0	2	0.913043	0	0.0869565	SS	miR156/157	conserved family	34.1654	n	16	y	0.0159535	y	15	y	0.0303704	y	0		9	Cold,Drought,Heat,Lipopolysaccharide,Ozone,Pectobacterium carotovorum,Phosphate-deficiency,Salt,Sulphur-deficiency	1	Cold	1	0.805828	0.602782
ath-miR156h	ath-miR157d	conserved	Vascular plants	conserved	Vascular plants	29	AT1G22000.1,AT1G26890.1,AT1G26890.2,AT1G26890.3,AT1G26890.4,AT1G26890.5,AT1G27360.1,AT1G27360.2,AT1G27360.3,AT1G27360.4,AT1G27370.1,AT1G27370.2,AT1G27370.3,AT1G27370.4,AT1G27370.5,AT1G27370.6,AT1G27370.7,AT1G53160.1,AT1G69170.1,AT2G42200.1,AT3G15270.1,AT3G57920.1,AT5G43270.1,AT5G43270.2,AT5G43270.3,AT5G50570.1,AT5G50570.2,AT5G50670.1,AT5G50670.2	28	0	1	0.965517	0	0.0344828	SS	miR156/157	conserved family	7.61905	n	16	y	0.0159535	y	15	y	0.00127722	n	0		9	Cold,Drought,Heat,Lipopolysaccharide,Ozone,Pectobacterium carotovorum,Phosphate-deficiency,Salt,Sulphur-deficiency	2	Cold,Hypoxic stress	1	0.804424	-0.338889
ath-miR156h	ath-miR414	conserved	Vascular plants	conserved	Flowering plants	4	AT1G26890.2,AT1G26890.3,AT1G26890.4,AT1G26890.5	0	0	4	0	0	1	SD	interfamily		46.5857	n	16	y	0.0159535	y	13	y	0.0806334	y	0		9	Cold,Drought,Heat,Lipopolysaccharide,Ozone,Pectobacterium carotovorum,Phosphate-deficiency,Salt,Sulphur-deficiency	0		0	0.534446
ath-miR156h	ath-miR5658	conserved	Vascular plants	non-conserved	Arabidopsis thaliana	2	AT1G27360.2,AT1G27360.4	0	0	2	0	0	1	SD	interfamily		220.786	n	16	y	0.0159535	y	46	y	0.431559	y	0		9	Cold,Drought,Heat,Lipopolysaccharide,Ozone,Pectobacterium carotovorum,Phosphate-deficiency,Salt,Sulphur-deficiency	0		0	0.517422	-0.112085
ath-miR156h	ath-miR838	conserved	Vascular plants	conserved	Brassicaceae	2	AT1G67040.1,AT1G67040.2	0	0	2	0	0	1	SD	interfamily		282.282	y	16	y	0.0159535	y	11	n	0.103315	y	0		9	Cold,Drought,Heat,Lipopolysaccharide,Ozone,Pectobacterium carotovorum,Phosphate-deficiency,Salt,Sulphur-deficiency	0		0	0.513252	0.149141
ath-miR156i	ath-miR156j	conserved	Land plants	conserved	Land plants	48	AT1G20710.1,AT1G27360.1,AT1G27360.2,AT1G27360.3,AT1G27360.4,AT1G27370.1,AT1G27370.2,AT1G27370.3,AT1G27370.4,AT1G27370.5,AT1G27370.6,AT1G27370.7,AT1G29890.1,AT1G29890.2,AT1G29890.3,AT1G34200.1,AT1G35516.2,AT1G52820.1,AT1G52820.2,AT1G53160.1,AT1G69170.1,AT1G71400.1,AT2G17220.1,AT2G17220.2,AT2G17640.1,AT2G28605.1,AT2G33810.1,AT2G42200.1,AT3G06330.2,AT3G08680.1,AT3G08680.2,AT3G15270.1,AT3G47170.1,AT3…	35	12	1	0.729167	0.25	0.0208333	SS	miR156/157	conserved family	13.1833	n	15	y	0.00706983	n	19	y	0.053095	y	7	AT3G08680,AT4G14510,AT5G55100,AT2G17220,AT1G71400,AT4G22530,AT2G33810	8	Cold,Drought,Heat,Lipopolysaccharide,Pectobacterium carotovorum,Phosphate-deficiency,Salt,Sulphur-deficiency	8	Cold,Drought,Heat,Lipopolysaccharide,Pectobacterium carotovorum,Phosphate-deficiency,Salt,Sulphur-deficiency	8	0.822971	0.743812
ath-miR156i	ath-miR157a-5p	conserved	Land plants	conserved	Vascular plants	22	AT1G27360.1,AT1G27360.2,AT1G27360.3,AT1G27360.4,AT1G27370.1,AT1G27370.2,AT1G27370.3,AT1G27370.4,AT1G27370.5,AT1G27370.6,AT1G27370.7,AT1G53160.1,AT1G69170.1,AT2G42200.1,AT3G57920.1,AT5G43270.1,AT5G43270.2,AT5G43270.3,AT5G50570.1,AT5G50570.2,AT5G50670.1,AT5G50670.2	21	0	1	0.954545	0	0.0454545	SS	miR156/157	conserved family	41.6477	n	15	y	0.00706983	n	15	y	0.0303704	y	0		8	Cold,Drought,Heat,Lipopolysaccharide,Pectobacterium carotovorum,Phosphate-deficiency,Salt,Sulphur-deficiency	1	Cold	1	0.737928	-0.668481
ath-miR156i	ath-miR157b-5p	conserved	Land plants	conserved	Vascular plants	22	AT1G27360.1,AT1G27360.2,AT1G27360.3,AT1G27360.4,AT1G27370.1,AT1G27370.2,AT1G27370.3,AT1G27370.4,AT1G27370.5,AT1G27370.6,AT1G27370.7,AT1G53160.1,AT1G69170.1,AT2G42200.1,AT3G57920.1,AT5G43270.1,AT5G43270.2,AT5G43270.3,AT5G50570.1,AT5G50570.2,AT5G50670.1,AT5G50670.2	21	0	1	0.954545	0	0.0454545	SS	miR156/157	conserved family	41.6477	n	15	y	0.00706983	n	15	y	0.0303704	y	0		8	Cold,Drought,Heat,Lipopolysaccharide,Pectobacterium carotovorum,Phosphate-deficiency,Salt,Sulphur-deficiency	1	Cold	1	0.737928	-0.668481
ath-miR156i	ath-miR157c-5p	conserved	Land plants	conserved	Vascular plants	22	AT1G27360.1,AT1G27360.2,AT1G27360.3,AT1G27360.4,AT1G27370.1,AT1G27370.2,AT1G27370.3,AT1G27370.4,AT1G27370.5,AT1G27370.6,AT1G27370.7,AT1G53160.1,AT1G69170.1,AT2G42200.1,AT3G57920.1,AT5G43270.1,AT5G43270.2,AT5G43270.3,AT5G50570.1,AT5G50570.2,AT5G50670.1,AT5G50670.2	21	0	1	0.954545	0	0.0454545	SS	miR156/157	conserved family	41.6477	n	15	y	0.00706983	n	15	y	0.0303704	y	0		8	Cold,Drought,Heat,Lipopolysaccharide,Pectobacterium carotovorum,Phosphate-deficiency,Salt,Sulphur-deficiency	1	Cold	1	0.737928	-0.668481
ath-miR156i	ath-miR157d	conserved	Land plants	conserved	Vascular plants	23	AT1G27360.1,AT1G27360.2,AT1G27360.3,AT1G27360.4,AT1G27370.1,AT1G27370.2,AT1G27370.3,AT1G27370.4,AT1G27370.5,AT1G27370.6,AT1G27370.7,AT1G53160.1,AT1G69170.1,AT2G42200.1,AT3G15270.1,AT3G57920.1,AT5G43270.1,AT5G43270.2,AT5G43270.3,AT5G50570.1,AT5G50570.2,AT5G50670.1,AT5G50670.2	23	0	0	1	0	0	SS	miR156/157	conserved family	13.4084	n	15	y	0.00706983	n	15	y	0.00127722	n	0		8	Cold,Drought,Heat,Lipopolysaccharide,Pectobacterium carotovorum,Phosphate-deficiency,Salt,Sulphur-deficiency	2	Cold,Hypoxic stress	1	0.731101
ath-miR156i	ath-miR5021	conserved	Land plants	non-conserved	Arabidopsis thaliana	1	AT2G33810.1	0	0	1	0	0	1	SD	interfamily		248.149	n	15	y	0.00706983	n	54	y	0.660861	y	1	AT2G33810	8	Cold,Drought,Heat,Lipopolysaccharide,Pectobacterium carotovorum,Phosphate-deficiency,Salt,Sulphur-deficiency	0		0	0.581692
ath-miR156i	ath-miR5658	conserved	Land plants	non-conserved	Arabidopsis thaliana	4	AT1G27360.2,AT1G27360.4,AT2G28610.1,AT4G16790.1	1	0	3	0.25	0	0.75	SD	interfamily		77.1357	n	15	y	0.00706983	n	46	y	0.431559	y	0		8	Cold,Drought,Heat,Lipopolysaccharide,Pectobacterium carotovorum,Phosphate-deficiency,Salt,Sulphur-deficiency	0		0	0.595482
ath-miR156j	ath-miR157a-5p	conserved	Land plants	conserved	Vascular plants	23	AT1G22000.1,AT1G27360.1,AT1G27360.2,AT1G27360.3,AT1G27360.4,AT1G27370.1,AT1G27370.2,AT1G27370.3,AT1G27370.4,AT1G27370.5,AT1G27370.6,AT1G27370.7,AT1G53160.1,AT1G69170.1,AT2G42200.1,AT3G57920.1,AT5G43270.1,AT5G43270.2,AT5G43270.3,AT5G50570.1,AT5G50570.2,AT5G50670.1,AT5G50670.2	21	1	1	0.913043	0.0434783	0.0434783	SS	miR156/157	conserved family	82.2298	n	19	y	0.053095	y	15	y	0.0303704	y	0		8	Cold,Drought,Heat,Lipopolysaccharide,Pectobacterium carotovorum,Phosphate-deficiency,Salt,Sulphur-deficiency	1	Cold	1	0.845748	0.893838
ath-miR156j	ath-miR157b-5p	conserved	Land plants	conserved	Vascular plants	23	AT1G22000.1,AT1G27360.1,AT1G27360.2,AT1G27360.3,AT1G27360.4,AT1G27370.1,AT1G27370.2,AT1G27370.3,AT1G27370.4,AT1G27370.5,AT1G27370.6,AT1G27370.7,AT1G53160.1,AT1G69170.1,AT2G42200.1,AT3G57920.1,AT5G43270.1,AT5G43270.2,AT5G43270.3,AT5G50570.1,AT5G50570.2,AT5G50670.1,AT5G50670.2	21	1	1	0.913043	0.0434783	0.0434783	SS	miR156/157	conserved family	82.2298	n	19	y	0.053095	y	15	y	0.0303704	y	0		8	Cold,Drought,Heat,Lipopolysaccharide,Pectobacterium carotovorum,Phosphate-deficiency,Salt,Sulphur-deficiency	1	Cold	1	0.845748	0.893838
ath-miR156j	ath-miR157c-5p	conserved	Land plants	conserved	Vascular plants	23	AT1G22000.1,AT1G27360.1,AT1G27360.2,AT1G27360.3,AT1G27360.4,AT1G27370.1,AT1G27370.2,AT1G27370.3,AT1G27370.4,AT1G27370.5,AT1G27370.6,AT1G27370.7,AT1G53160.1,AT1G69170.1,AT2G42200.1,AT3G57920.1,AT5G43270.1,AT5G43270.2,AT5G43270.3,AT5G50570.1,AT5G50570.2,AT5G50670.1,AT5G50670.2	21	1	1	0.913043	0.0434783	0.0434783	SS	miR156/157	conserved family	82.2298	n	19	y	0.053095	y	15	y	0.0303704	y	0		8	Cold,Drought,Heat,Lipopolysaccharide,Pectobacterium carotovorum,Phosphate-deficiency,Salt,Sulphur-deficiency	1	Cold	1	0.845748	0.893838
ath-miR156j	ath-miR157d	conserved	Land plants	conserved	Vascular plants	29	AT1G22000.1,AT1G26890.1,AT1G26890.2,AT1G26890.3,AT1G26890.4,AT1G26890.5,AT1G27360.1,AT1G27360.2,AT1G27360.3,AT1G27360.4,AT1G27370.1,AT1G27370.2,AT1G27370.3,AT1G27370.4,AT1G27370.5,AT1G27370.6,AT1G27370.7,AT1G53160.1,AT1G69170.1,AT2G42200.1,AT3G15270.1,AT3G57920.1,AT5G43270.1,AT5G43270.2,AT5G43270.3,AT5G50570.1,AT5G50570.2,AT5G50670.1,AT5G50670.2	28	1	0	0.965517	0.0344828	0	SS	miR156/157	conserved family	21.1775	n	19	y	0.053095	y	15	y	0.00127722	n	0		8	Cold,Drought,Heat,Lipopolysaccharide,Pectobacterium carotovorum,Phosphate-deficiency,Salt,Sulphur-deficiency	2	Cold,Hypoxic stress	1	0.843958	-0.433254
ath-miR156j	ath-miR2111a-5p	conserved	Land plants	conserved	Seed plants	2	AT3G27150.1,AT3G27150.2	0	0	2	0	0	1	SD	interfamily		262	n	19	y	0.053095	y	2	n	0	n	1	AT3G27150	8	Cold,Drought,Heat,Lipopolysaccharide,Pectobacterium carotovorum,Phosphate-deficiency,Salt,Sulphur-deficiency	1	Phosphate-deficiency	1	0.420843	0.152169
ath-miR156j	ath-miR2111b-5p	conserved	Land plants	conserved	Seed plants	2	AT3G27150.1,AT3G27150.2	0	0	2	0	0	1	SD	interfamily		262	n	19	y	0.053095	y	2	n	0	n	1	AT3G27150	8	Cold,Drought,Heat,Lipopolysaccharide,Pectobacterium carotovorum,Phosphate-deficiency,Salt,Sulphur-deficiency	1	Phosphate-deficiency	1	0.420843	0.152169
ath-miR156j	ath-miR414	conserved	Land plants	conserved	Flowering plants	4	AT1G26890.2,AT1G26890.3,AT1G26890.4,AT1G26890.5	0	0	4	0	0	1	SD	interfamily		61.0857	n	19	y	0.053095	y	13	y	0.0806334	y	0		8	Cold,Drought,Heat,Lipopolysaccharide,Pectobacterium carotovorum,Phosphate-deficiency,Salt,Sulphur-deficiency	0		0	0.577158
ath-miR156j	ath-miR5021	conserved	Land plants	non-conserved	Arabidopsis thaliana	1	AT2G33810.1	0	0	1	0	0	1	SD	interfamily		463.394	y	19	y	0.053095	y	54	y	0.660861	y	1	AT2G33810	8	Cold,Drought,Heat,Lipopolysaccharide,Pectobacterium carotovorum,Phosphate-deficiency,Salt,Sulphur-deficiency	0		0	0.532958
ath-miR156j	ath-miR5658	conserved	Land plants	non-conserved	Arabidopsis thaliana	3	AT1G27360.2,AT1G27360.4,AT4G35730.1	1	0	2	0.333333	0	0.666667	SD	interfamily		356.143	y	19	y	0.053095	y	46	y	0.431559	y	0		8	Cold,Drought,Heat,Lipopolysaccharide,Pectobacterium carotovorum,Phosphate-deficiency,Salt,Sulphur-deficiency	0		0	0.535192	-0.0160493
ath-miR156j	ath-miR838	conserved	Land plants	conserved	Brassicaceae	2	AT1G67040.1,AT1G67040.2	0	0	2	0	0	1	SD	interfamily		307.782	y	19	y	0.053095	y	11	n	0.103315	y	0		8	Cold,Drought,Heat,Lipopolysaccharide,Pectobacterium carotovorum,Phosphate-deficiency,Salt,Sulphur-deficiency	0		0	0.559054	0.192824
ath-miR157a-3p	ath-miR157b-3p	conserved	Rosids	conserved	Rosids	3	AT1G34000.1,AT2G43710.1,AT2G43710.2	1	2	0	0.333333	0.666667	0	DD	miR156/157	conserved family	2	n	1	n	0	n	1	n	0	n	2	AT2G43710,AT1G34000	1	Cold	1	Cold	1	1	1
ath-miR157a-5p	ath-miR157b-5p	conserved	Vascular plants	conserved	Vascular plants	29	AT1G22000.1,AT1G27360.1,AT1G27360.2,AT1G27360.3,AT1G27360.4,AT1G27370.1,AT1G27370.2,AT1G27370.3,AT1G27370.4,AT1G27370.5,AT1G27370.6,AT1G27370.7,AT1G32140.1,AT1G53160.1,AT1G69170.1,AT2G22370.1,AT2G42200.1,AT3G19565.1,AT3G57920.1,AT3G59780.1,AT4G14510.1,AT5G08620.1,AT5G43270.1,AT5G43270.2,AT5G43270.3,AT5G50570.1,AT5G50570.2,AT5G50670.1,AT5G50670.2	23	6	0	0.793103	0.206897	0	SS	miR156/157	conserved family	2	n	15	y	0.0303704	y	15	y	0.0303704	y	2	AT5G08620,AT4G14510	1	Cold	1	Cold	1	1	1
ath-miR157a-5p	ath-miR157c-5p	conserved	Vascular plants	conserved	Vascular plants	29	AT1G22000.1,AT1G27360.1,AT1G27360.2,AT1G27360.3,AT1G27360.4,AT1G27370.1,AT1G27370.2,AT1G27370.3,AT1G27370.4,AT1G27370.5,AT1G27370.6,AT1G27370.7,AT1G32140.1,AT1G53160.1,AT1G69170.1,AT2G22370.1,AT2G42200.1,AT3G19565.1,AT3G57920.1,AT3G59780.1,AT4G14510.1,AT5G08620.1,AT5G43270.1,AT5G43270.2,AT5G43270.3,AT5G50570.1,AT5G50570.2,AT5G50670.1,AT5G50670.2	23	6	0	0.793103	0.206897	0	SS	miR156/157	conserved family	2	n	15	y	0.0303704	y	15	y	0.0303704	y	2	AT5G08620,AT4G14510	1	Cold	1	Cold	1	1	1
ath-miR157a-5p	ath-miR157d	conserved	Vascular plants	conserved	Vascular plants	26	AT1G22000.1,AT1G27360.1,AT1G27360.2,AT1G27360.3,AT1G27360.4,AT1G27370.1,AT1G27370.2,AT1G27370.3,AT1G27370.4,AT1G27370.5,AT1G27370.6,AT1G27370.7,AT1G53160.1,AT1G69170.1,AT2G42200.1,AT3G19565.1,AT3G57920.1,AT4G14510.1,AT5G08620.1,AT5G43270.1,AT5G43270.2,AT5G43270.3,AT5G50570.1,AT5G50570.2,AT5G50670.1,AT5G50670.2	22	3	1	0.846154	0.115385	0.0384615	SS	miR156/157	conserved family	9.09524	n	15	y	0.0303704	y	15	y	0.00127722	n	2	AT5G08620,AT4G14510	1	Cold	2	Cold,Hypoxic stress	1	0.927683	0.900343
ath-miR157a-5p	ath-miR5658	conserved	Vascular plants	non-conserved	Arabidopsis thaliana	2	AT1G27360.2,AT1G27360.4	0	0	2	0	0	1	SD	interfamily		310.493	y	15	y	0.0303704	y	46	y	0.431559	y	0		1	Cold	0		0	0.568568	0.0669668
ath-miR157a-5p	ath-miR859	conserved	Vascular plants	non-conserved	Arabidopsis thaliana	1	AT1G32140.1	0	0	1	0	0	1	SD	interfamily		541.165	y	15	y	0.0303704	y	8	n	0.0891742	y	0		1	Cold	0		0	0.622033	-0.196895
ath-miR157b-5p	ath-miR157c-5p	conserved	Vascular plants	conserved	Vascular plants	29	AT1G22000.1,AT1G27360.1,AT1G27360.2,AT1G27360.3,AT1G27360.4,AT1G27370.1,AT1G27370.2,AT1G27370.3,AT1G27370.4,AT1G27370.5,AT1G27370.6,AT1G27370.7,AT1G32140.1,AT1G53160.1,AT1G69170.1,AT2G22370.1,AT2G42200.1,AT3G19565.1,AT3G57920.1,AT3G59780.1,AT4G14510.1,AT5G08620.1,AT5G43270.1,AT5G43270.2,AT5G43270.3,AT5G50570.1,AT5G50570.2,AT5G50670.1,AT5G50670.2	23	6	0	0.793103	0.206897	0	SS	miR156/157	conserved family	2	n	15	y	0.0303704	y	15	y	0.0303704	y	2	AT5G08620,AT4G14510	1	Cold	1	Cold	1	1	1
ath-miR157b-5p	ath-miR157d	conserved	Vascular plants	conserved	Vascular plants	26	AT1G22000.1,AT1G27360.1,AT1G27360.2,AT1G27360.3,AT1G27360.4,AT1G27370.1,AT1G27370.2,AT1G27370.3,AT1G27370.4,AT1G27370.5,AT1G27370.6,AT1G27370.7,AT1G53160.1,AT1G69170.1,AT2G42200.1,AT3G19565.1,AT3G57920.1,AT4G14510.1,AT5G08620.1,AT5G43270.1,AT5G43270.2,AT5G43270.3,AT5G50570.1,AT5G50570.2,AT5G50670.1,AT5G50670.2	22	3	1	0.846154	0.115385	0.0384615	SS	miR156/157	conserved family	9.09524	n	15	y	0.0303704	y	15	y	0.00127722	n	2	AT5G08620,AT4G14510	1	Cold	2	Cold,Hypoxic stress	1	0.927683	0.900343
ath-miR157b-5p	ath-miR5658	conserved	Vascular plants	non-conserved	Arabidopsis thaliana	2	AT1G27360.2,AT1G27360.4	0	0	2	0	0	1	SD	interfamily		310.493	y	15	y	0.0303704	y	46	y	0.431559	y	0		1	Cold	0		0	0.568568	0.0669668
ath-miR157b-5p	ath-miR859	conserved	Vascular plants	non-conserved	Arabidopsis thaliana	1	AT1G32140.1	0	0	1	0	0	1	SD	interfamily		541.165	y	15	y	0.0303704	y	8	n	0.0891742	y	0		1	Cold	0		0	0.622033	-0.196895
ath-miR157c-5p	ath-miR157d	conserved	Vascular plants	conserved	Vascular plants	26	AT1G22000.1,AT1G27360.1,AT1G27360.2,AT1G27360.3,AT1G27360.4,AT1G27370.1,AT1G27370.2,AT1G27370.3,AT1G27370.4,AT1G27370.5,AT1G27370.6,AT1G27370.7,AT1G53160.1,AT1G69170.1,AT2G42200.1,AT3G19565.1,AT3G57920.1,AT4G14510.1,AT5G08620.1,AT5G43270.1,AT5G43270.2,AT5G43270.3,AT5G50570.1,AT5G50570.2,AT5G50670.1,AT5G50670.2	22	3	1	0.846154	0.115385	0.0384615	SS	miR156/157	conserved family	9.09524	n	15	y	0.0303704	y	15	y	0.00127722	n	2	AT5G08620,AT4G14510	1	Cold	2	Cold,Hypoxic stress	1	0.927683	0.900343
ath-miR157c-5p	ath-miR5658	conserved	Vascular plants	non-conserved	Arabidopsis thaliana	2	AT1G27360.2,AT1G27360.4	0	0	2	0	0	1	SD	interfamily		310.493	y	15	y	0.0303704	y	46	y	0.431559	y	0		1	Cold	0		0	0.568568	0.0669668
ath-miR157c-5p	ath-miR859	conserved	Vascular plants	non-conserved	Arabidopsis thaliana	1	AT1G32140.1	0	0	1	0	0	1	SD	interfamily		541.165	y	15	y	0.0303704	y	8	n	0.0891742	y	0		1	Cold	0		0	0.622033	-0.196895
ath-miR157d	ath-miR414	conserved	Vascular plants	conserved	Flowering plants	4	AT1G26890.2,AT1G26890.3,AT1G26890.4,AT1G26890.5	0	0	4	0	0	1	SD	interfamily		53.2632	n	15	y	0.00127722	n	13	y	0.0806334	y	0		2	Cold,Hypoxic stress	0		0	0.566286
ath-miR157d	ath-miR5658	conserved	Vascular plants	non-conserved	Arabidopsis thaliana	2	AT1G27360.2,AT1G27360.4	0	0	2	0	0	1	SD	interfamily		91.5584	n	15	y	0.00127722	n	46	y	0.431559	y	0		2	Cold,Hypoxic stress	0		0	0.509687	0.267925
ath-miR158a-3p	ath-miR158b	conserved	Brassicaceae	conserved	Brassicaceae	9	AT1G64100.1,AT1G64100.2,AT1G64100.3,AT2G03210.1,AT2G03210.2,AT2G03210.3,AT2G03220.1,AT5G61010.1,AT5G61010.2	0	0	9	0	0	1	SD	miR158	conserved family	2	n	1	n	0	n	1	n	0	n	2	AT2G03220,AT5G61010	3	Ferrum deficiency,Hypoxic stress,Lipopolysaccharide	1	Lipopolysaccharide	1	1	0.953352
ath-miR159a	ath-miR159b-3p	conserved	Seed plants	conserved	Seed plants	6	AT2G26950.1,AT2G32460.1,AT2G32460.2,AT2G34010.1,AT2G34010.2,AT5G55020.1	5	1	0	0.833333	0.166667	0	SS	miR159/319	conserved family	2	n	7	n	0.0104609	y	7	n	0.0104609	y	0		11	Abscisic acid,Cold,Drought,Ferrum deficiency,Hypoxic stress,Lipopolysaccharide,Ozone,Pectobacterium carotovorum,Phosphate-deficiency,Sulphur-deficiency,Ultraviolet B	8	Abscisic acid,Cold,Drought,Lipopolysaccharide,Pectobacterium carotovorum,Phosphate-deficiency,Sulphur-deficiency,Ultraviolet B	8	0.958352	0.97292
ath-miR159a	ath-miR159c	conserved	Seed plants	conserved	Land plants	13	AT2G26950.1,AT3G11440.1,AT3G11440.2,AT3G11440.3,AT3G11440.4,AT3G60460.1,AT4G37770.1,AT5G06100.1,AT5G06100.2,AT5G06100.3,AT5G06100.4,AT5G06100.5,AT5G55020.1	12	0	1	0.923077	0	0.0769231	SS	miR159/319	conserved family	31.9857	n	7	n	0.0104609	y	6	n	0.00319718	n	2	AT3G11440,AT4G37770	11	Abscisic acid,Cold,Drought,Ferrum deficiency,Hypoxic stress,Lipopolysaccharide,Ozone,Pectobacterium carotovorum,Phosphate-deficiency,Sulphur-deficiency,Ultraviolet B	8	Abscisic acid,Cold,Drought,Lipopolysaccharide,Pectobacterium carotovorum,Phosphate-deficiency,Sulphur-deficiency,Ultraviolet B	8	0.911017	0.936489
ath-miR159a	ath-miR319a	conserved	Seed plants	conserved	Land plants	1	AT2G26950.1	1	0	0	1	0	0	SS	miR159/319	conserved family	77.4524	n	7	n	0.0104609	y	5	n	0	n	0		11	Abscisic acid,Cold,Drought,Ferrum deficiency,Hypoxic stress,Lipopolysaccharide,Ozone,Pectobacterium carotovorum,Phosphate-deficiency,Sulphur-deficiency,Ultraviolet B	5	Aluminum excess,Cold,Drought,SO2,Salt	2	0.729217	0.869774
ath-miR159a	ath-miR319b	conserved	Seed plants	conserved	Land plants	1	AT2G26950.1	1	0	0	1	0	0	SS	miR159/319	conserved family	77.4524	n	7	n	0.0104609	y	5	n	0	n	0		11	Abscisic acid,Cold,Drought,Ferrum deficiency,Hypoxic stress,Lipopolysaccharide,Ozone,Pectobacterium carotovorum,Phosphate-deficiency,Sulphur-deficiency,Ultraviolet B	4	Aluminum excess,Cold,Drought,Salt	2	0.729217	0.869774
ath-miR159a	ath-miR319c	conserved	Seed plants	conserved	Land plants	10	AT2G26950.1,AT3G11440.1,AT3G11440.2,AT3G11440.3,AT3G11440.4,AT5G06100.1,AT5G06100.2,AT5G06100.3,AT5G06100.4,AT5G06100.5	10	0	0	1	0	0	SS	miR159/319	conserved family	2	n	7	n	0.0104609	y	7	n	0.0104609	y	1	AT3G11440	11	Abscisic acid,Cold,Drought,Ferrum deficiency,Hypoxic stress,Lipopolysaccharide,Ozone,Pectobacterium carotovorum,Phosphate-deficiency,Sulphur-deficiency,Ultraviolet B	5	Abscisic acid,Aluminum excess,Cold,Drought,Salt	3	0.729217	0.896295
ath-miR159a	ath-miR5021	conserved	Seed plants	non-conserved	Arabidopsis thaliana	2	AT2G32460.1,AT2G32460.2	2	0	0	1	0	0	SS	interfamily		271.605	y	7	n	0.0104609	y	54	y	0.660861	y	0		11	Abscisic acid,Cold,Drought,Ferrum deficiency,Hypoxic stress,Lipopolysaccharide,Ozone,Pectobacterium carotovorum,Phosphate-deficiency,Sulphur-deficiency,Ultraviolet B	0		0	0.493608
ath-miR159a	ath-miR5658	conserved	Seed plants	non-conserved	Arabidopsis thaliana	1	AT5G55020.1	0	0	1	0	0	1	SD	interfamily		163.286	n	7	n	0.0104609	y	46	y	0.431559	y	0		11	Abscisic acid,Cold,Drought,Ferrum deficiency,Hypoxic stress,Lipopolysaccharide,Ozone,Pectobacterium carotovorum,Phosphate-deficiency,Sulphur-deficiency,Ultraviolet B	0		0	0.513142	0.0894684
ath-miR159b-3p	ath-miR159c	conserved	Seed plants	conserved	Land plants	4	AT2G26950.1,AT4G26930.1,AT4G27330.1,AT5G55020.1	3	0	1	0.75	0	0.25	SS	miR159/319	conserved family	31.9857	n	7	n	0.0104609	y	6	n	0.00319718	n	0		8	Abscisic acid,Cold,Drought,Lipopolysaccharide,Pectobacterium carotovorum,Phosphate-deficiency,Sulphur-deficiency,Ultraviolet B	8	Abscisic acid,Cold,Drought,Lipopolysaccharide,Pectobacterium carotovorum,Phosphate-deficiency,Sulphur-deficiency,Ultraviolet B	8	0.954451	0.961058
ath-miR159b-3p	ath-miR319a	conserved	Seed plants	conserved	Land plants	1	AT2G26950.1	1	0	0	1	0	0	SS	miR159/319	conserved family	77.4524	n	7	n	0.0104609	y	5	n	0	n	0		8	Abscisic acid,Cold,Drought,Lipopolysaccharide,Pectobacterium carotovorum,Phosphate-deficiency,Sulphur-deficiency,Ultraviolet B	5	Aluminum excess,Cold,Drought,SO2,Salt	2	0.689678	0.850511
ath-miR159b-3p	ath-miR319b	conserved	Seed plants	conserved	Land plants	1	AT2G26950.1	1	0	0	1	0	0	SS	miR159/319	conserved family	77.4524	n	7	n	0.0104609	y	5	n	0	n	0		8	Abscisic acid,Cold,Drought,Lipopolysaccharide,Pectobacterium carotovorum,Phosphate-deficiency,Sulphur-deficiency,Ultraviolet B	4	Aluminum excess,Cold,Drought,Salt	2	0.689678	0.850511
ath-miR159b-3p	ath-miR319c	conserved	Seed plants	conserved	Land plants	1	AT2G26950.1	1	0	0	1	0	0	SS	miR159/319	conserved family	2	n	7	n	0.0104609	y	7	n	0.0104609	y	0		8	Abscisic acid,Cold,Drought,Lipopolysaccharide,Pectobacterium carotovorum,Phosphate-deficiency,Sulphur-deficiency,Ultraviolet B	5	Abscisic acid,Aluminum excess,Cold,Drought,Salt	3	0.802522	0.893679
ath-miR159b-3p	ath-miR5021	conserved	Seed plants	non-conserved	Arabidopsis thaliana	2	AT2G32460.1,AT2G32460.2	2	0	0	1	0	0	SS	interfamily		271.605	y	7	n	0.0104609	y	54	y	0.660861	y	0		8	Abscisic acid,Cold,Drought,Lipopolysaccharide,Pectobacterium carotovorum,Phosphate-deficiency,Sulphur-deficiency,Ultraviolet B	0		0	0.461522
ath-miR159b-3p	ath-miR5658	conserved	Seed plants	non-conserved	Arabidopsis thaliana	1	AT5G55020.1	0	0	1	0	0	1	SD	interfamily		163.286	n	7	n	0.0104609	y	46	y	0.431559	y	0		8	Abscisic acid,Cold,Drought,Lipopolysaccharide,Pectobacterium carotovorum,Phosphate-deficiency,Sulphur-deficiency,Ultraviolet B	0		0	0.484577	0.132744
ath-miR159c	ath-miR319a	conserved	Land plants	conserved	Land plants	1	AT2G26950.1	1	0	0	1	0	0	SS	miR159/319	conserved family	29.6429	n	6	n	0.00319718	n	5	n	0	n	0		8	Abscisic acid,Cold,Drought,Lipopolysaccharide,Pectobacterium carotovorum,Phosphate-deficiency,Sulphur-deficiency,Ultraviolet B	5	Aluminum excess,Cold,Drought,SO2,Salt	2	0.726947	0.817874
ath-miR159c	ath-miR319b	conserved	Land plants	conserved	Land plants	1	AT2G26950.1	1	0	0	1	0	0	SS	miR159/319	conserved family	29.6429	n	6	n	0.00319718	n	5	n	0	n	0		8	Abscisic acid,Cold,Drought,Lipopolysaccharide,Pectobacterium carotovorum,Phosphate-deficiency,Sulphur-deficiency,Ultraviolet B	4	Aluminum excess,Cold,Drought,Salt	2	0.726947	0.817874
ath-miR159c	ath-miR319c	conserved	Land plants	conserved	Land plants	10	AT2G26950.1,AT3G11440.1,AT3G11440.2,AT3G11440.3,AT3G11440.4,AT5G06100.1,AT5G06100.2,AT5G06100.3,AT5G06100.4,AT5G06100.5	10	0	0	1	0	0	SS	miR159/319	conserved family	31.9857	n	6	n	0.00319718	n	7	n	0.0104609	y	1	AT3G11440	8	Abscisic acid,Cold,Drought,Lipopolysaccharide,Pectobacterium carotovorum,Phosphate-deficiency,Sulphur-deficiency,Ultraviolet B	5	Abscisic acid,Aluminum excess,Cold,Drought,Salt	3	0.836168	0.88868
ath-miR159c	ath-miR5658	conserved	Land plants	non-conserved	Arabidopsis thaliana	1	AT5G55020.1	1	0	0	1	0	0	SS	interfamily		219.329	n	6	n	0.00319718	n	46	y	0.431559	y	0		8	Abscisic acid,Cold,Drought,Lipopolysaccharide,Pectobacterium carotovorum,Phosphate-deficiency,Sulphur-deficiency,Ultraviolet B	0		0	0.498778	0.249558
ath-miR160a-5p	ath-miR160b	conserved	Land plants	conserved	Land plants	5	AT1G77850.1,AT1G77850.2,AT2G28350.1,AT2G28350.2,AT4G30080.1	5	0	0	1	0	0	SS	miR160	conserved family	2	n	2	n	0	n	2	n	0	n	3	AT4G30080,AT1G77850,AT2G28350	5	Auxin,Drought,Heat,Nitrogen-deficiency,Phosphate-deficiency	6	Auxin,Drought,Heat,Nitrogen-deficiency,Phosphate-deficiency,SO2	5	1	1
ath-miR160a-5p	ath-miR160c-5p	conserved	Land plants	conserved	Land plants	5	AT1G77850.1,AT1G77850.2,AT2G28350.1,AT2G28350.2,AT4G30080.1	5	0	0	1	0	0	SS	miR160	conserved family	2	n	2	n	0	n	2	n	0	n	3	AT4G30080,AT1G77850,AT2G28350	5	Auxin,Drought,Heat,Nitrogen-deficiency,Phosphate-deficiency	5	Auxin,Drought,Heat,Nitrogen-deficiency,Phosphate-deficiency	5	1	1
ath-miR160b	ath-miR160c-5p	conserved	Land plants	conserved	Land plants	5	AT1G77850.1,AT1G77850.2,AT2G28350.1,AT2G28350.2,AT4G30080.1	5	0	0	1	0	0	SS	miR160	conserved family	2	n	2	n	0	n	2	n	0	n	3	AT4G30080,AT1G77850,AT2G28350	6	Auxin,Drought,Heat,Nitrogen-deficiency,Phosphate-deficiency,SO2	5	Auxin,Drought,Heat,Nitrogen-deficiency,Phosphate-deficiency	5	1	1
ath-miR161.1	ath-miR161.2	conserved	Brassicaceae	conserved	Brassicaceae	13	AT1G62910.1,AT1G62930.1,AT1G63130.1,AT1G63130.2,AT1G63150.1,AT1G63150.2,AT1G63230.1,AT1G63400.1,AT1G63630.1,AT5G16640.1,AT5G41170.1,AT5G41170.2,AT5G41170.3	9	1	3	0.692308	0.0769231	0.230769	SS	miR161	conserved family	2	n	3	n	0	n	3	n	0	n	0		1	Drought	0		0	0.974522	-0.151766
ath-miR161.1	ath-miR400	conserved	Brassicaceae	conserved	Brassicaceae	16	AT1G06580.1,AT1G06580.2,AT1G06580.3,AT1G62670.1,AT1G62670.2,AT1G62910.1,AT1G62930.1,AT1G63080.1,AT1G63080.2,AT1G63080.3,AT1G63130.1,AT1G63130.2,AT1G63400.1,AT1G64583.1,AT1G64583.2,AT5G16640.1	9	0	7	0.5625	0	0.4375	SS	interfamily		260	n	3	n	0	n	4	n	0.0447606	y	0		1	Drought	0		0	0.947911	0.166484
ath-miR161.1	ath-miR5652	conserved	Brassicaceae	non-conserved	Arabidopsis thaliana	2	AT1G63130.1,AT1G63130.2	2	0	0	1	0	0	SS	interfamily		2	n	3	n	0	n	3	n	0	n	0		1	Drought	0		0	0.573752	0.784758
ath-miR161.2	ath-miR400	conserved	Brassicaceae	conserved	Brassicaceae	13	AT1G62590.1,AT1G62590.2,AT1G62910.1,AT1G62914.1,AT1G62930.1,AT1G63070.1,AT1G63130.1,AT1G63130.2,AT1G63330.1,AT1G63330.2,AT1G63330.3,AT1G63400.1,AT5G16640.1	12	0	1	0.923077	0	0.0769231	SS	interfamily		260	n	3	n	0	n	4	n	0.0447606	y	0		0		0		0	0.9661	0.327597
ath-miR161.2	ath-miR5652	conserved	Brassicaceae	non-conserved	Arabidopsis thaliana	2	AT1G63130.1,AT1G63130.2	2	0	0	1	0	0	SS	interfamily		2	n	3	n	0	n	3	n	0	n	0		0		0		0	0.610447	-0.450096
ath-miR164a	ath-miR164b-5p	conserved	Seed plants	conserved	Seed plants	14	AT1G56010.1,AT1G56010.2,AT2G47650.1,AT2G47650.2,AT3G12977.1,AT3G12977.2,AT3G15170.1,AT3G62830.1,AT3G62830.2,AT5G07680.1,AT5G07680.2,AT5G53950.1,AT5G61430.1,AT5G61430.2	14	0	0	1	0	0	SS	miR164	conserved family	2	n	2	n	0	n	2	n	0	n	5	AT3G15170,AT2G47650,AT5G53950,AT1G56010,AT3G62830	4	Auxin,Cold,Drought,Gamma-irradiated	4	Auxin,Cold,Drought,Salt	3	1	1
ath-miR164a	ath-miR164c-5p	conserved	Seed plants	conserved	Seed plants	14	AT1G56010.1,AT1G56010.2,AT2G47650.1,AT2G47650.2,AT3G12977.1,AT3G12977.2,AT3G15170.1,AT3G62830.1,AT3G62830.2,AT5G07680.1,AT5G07680.2,AT5G53950.1,AT5G61430.1,AT5G61430.2	14	0	0	1	0	0	SS	miR164	conserved family	2	n	2	n	0	n	2	n	0	n	5	AT3G15170,AT2G47650,AT5G53950,AT1G56010,AT3G62830	4	Auxin,Cold,Drought,Gamma-irradiated	3	Auxin,Cold,Drought	3	0.975419	0.827726
ath-miR164b-5p	ath-miR164c-5p	conserved	Seed plants	conserved	Seed plants	14	AT1G56010.1,AT1G56010.2,AT2G47650.1,AT2G47650.2,AT3G12977.1,AT3G12977.2,AT3G15170.1,AT3G62830.1,AT3G62830.2,AT5G07680.1,AT5G07680.2,AT5G53950.1,AT5G61430.1,AT5G61430.2	14	0	0	1	0	0	SS	miR164	conserved family	2	n	2	n	0	n	2	n	0	n	5	AT3G15170,AT2G47650,AT5G53950,AT1G56010,AT3G62830	4	Auxin,Cold,Drought,Salt	3	Auxin,Cold,Drought	3	0.975419	0.827726
ath-miR165a-3p	ath-miR165b	conserved	Land plants	conserved	Land plants	7	AT1G30490.1,AT1G52150.1,AT1G52150.2,AT1G52150.3,AT2G34710.1,AT4G32880.1,AT5G60690.1	7	0	0	1	0	0	SS	miR165/166	conserved family	2	n	9	n	0	n	9	n	0	n	3	AT1G52150,AT2G34710,AT4G32880	5	Abscisic acid,Cold,Flu (fluridone),Ozone,Salt	4	Abscisic acid,Cold,Flu (fluridone),Salt	4	1	1
ath-miR165a-3p	ath-miR166a-3p	conserved	Land plants	conserved	Land plants	7	AT1G30490.1,AT1G52150.1,AT1G52150.2,AT1G52150.3,AT2G34710.1,AT4G32880.1,AT5G60690.1	7	0	0	1	0	0	SS	miR165/166	conserved family	2	n	9	n	0	n	9	n	0	n	3	AT1G52150,AT2G34710,AT4G32880	5	Abscisic acid,Cold,Flu (fluridone),Ozone,Salt	3	Cold,Ozone,Salt	3	1	0.988881
ath-miR165a-3p	ath-miR166b-3p	conserved	Land plants	conserved	Land plants	7	AT1G30490.1,AT1G52150.1,AT1G52150.2,AT1G52150.3,AT2G34710.1,AT4G32880.1,AT5G60690.1	7	0	0	1	0	0	SS	miR165/166	conserved family	2	n	9	n	0	n	9	n	0	n	3	AT1G52150,AT2G34710,AT4G32880	5	Abscisic acid,Cold,Flu (fluridone),Ozone,Salt	2	Cold,Salt	2	1	0.988881
ath-miR165a-3p	ath-miR166c	conserved	Land plants	conserved	Land plants	7	AT1G30490.1,AT1G52150.1,AT1G52150.2,AT1G52150.3,AT2G34710.1,AT4G32880.1,AT5G60690.1	7	0	0	1	0	0	SS	miR165/166	conserved family	2	n	9	n	0	n	9	n	0	n	3	AT1G52150,AT2G34710,AT4G32880	5	Abscisic acid,Cold,Flu (fluridone),Ozone,Salt	1	Cold	1	1	0.988881
ath-miR165a-3p	ath-miR166d	conserved	Land plants	conserved	Land plants	7	AT1G30490.1,AT1G52150.1,AT1G52150.2,AT1G52150.3,AT2G34710.1,AT4G32880.1,AT5G60690.1	7	0	0	1	0	0	SS	miR165/166	conserved family	2	n	9	n	0	n	9	n	0	n	3	AT1G52150,AT2G34710,AT4G32880	5	Abscisic acid,Cold,Flu (fluridone),Ozone,Salt	1	Cold	1	1	0.988881
ath-miR165a-3p	ath-miR166e-3p	conserved	Land plants	conserved	Land plants	7	AT1G30490.1,AT1G52150.1,AT1G52150.2,AT1G52150.3,AT2G34710.1,AT4G32880.1,AT5G60690.1	7	0	0	1	0	0	SS	miR165/166	conserved family	2	n	9	n	0	n	9	n	0	n	3	AT1G52150,AT2G34710,AT4G32880	5	Abscisic acid,Cold,Flu (fluridone),Ozone,Salt	1	Cold	1	1	0.988881
ath-miR165a-3p	ath-miR166f	conserved	Land plants	conserved	Land plants	7	AT1G30490.1,AT1G52150.1,AT1G52150.2,AT1G52150.3,AT2G34710.1,AT4G32880.1,AT5G60690.1	7	0	0	1	0	0	SS	miR165/166	conserved family	2	n	9	n	0	n	9	n	0	n	3	AT1G52150,AT2G34710,AT4G32880	5	Abscisic acid,Cold,Flu (fluridone),Ozone,Salt	1	Cold	1	1	0.988881
ath-miR165a-3p	ath-miR166g	conserved	Land plants	conserved	Land plants	7	AT1G30490.1,AT1G52150.1,AT1G52150.2,AT1G52150.3,AT2G34710.1,AT4G32880.1,AT5G60690.1	7	0	0	1	0	0	SS	miR165/166	conserved family	2	n	9	n	0	n	9	n	0	n	3	AT1G52150,AT2G34710,AT4G32880	5	Abscisic acid,Cold,Flu (fluridone),Ozone,Salt	1	Cold	1	1	0.988881
ath-miR165a-3p	ath-miR5021	conserved	Land plants	non-conserved	Arabidopsis thaliana	1	AT5G60690.1	0	0	1	0	0	1	SD	interfamily		248	n	9	n	0	n	54	y	0.660861	y	0		5	Abscisic acid,Cold,Flu (fluridone),Ozone,Salt	0		0	0.445742
ath-miR165b	ath-miR166a-3p	conserved	Land plants	conserved	Land plants	7	AT1G30490.1,AT1G52150.1,AT1G52150.2,AT1G52150.3,AT2G34710.1,AT4G32880.1,AT5G60690.1	7	0	0	1	0	0	SS	miR165/166	conserved family	2	n	9	n	0	n	9	n	0	n	3	AT1G52150,AT2G34710,AT4G32880	4	Abscisic acid,Cold,Flu (fluridone),Salt	3	Cold,Ozone,Salt	2	1	0.988881
ath-miR165b	ath-miR166b-3p	conserved	Land plants	conserved	Land plants	7	AT1G30490.1,AT1G52150.1,AT1G52150.2,AT1G52150.3,AT2G34710.1,AT4G32880.1,AT5G60690.1	7	0	0	1	0	0	SS	miR165/166	conserved family	2	n	9	n	0	n	9	n	0	n	3	AT1G52150,AT2G34710,AT4G32880	4	Abscisic acid,Cold,Flu (fluridone),Salt	2	Cold,Salt	2	1	0.988881
ath-miR165b	ath-miR166c	conserved	Land plants	conserved	Land plants	7	AT1G30490.1,AT1G52150.1,AT1G52150.2,AT1G52150.3,AT2G34710.1,AT4G32880.1,AT5G60690.1	7	0	0	1	0	0	SS	miR165/166	conserved family	2	n	9	n	0	n	9	n	0	n	3	AT1G52150,AT2G34710,AT4G32880	4	Abscisic acid,Cold,Flu (fluridone),Salt	1	Cold	1	1	0.988881
ath-miR165b	ath-miR166d	conserved	Land plants	conserved	Land plants	7	AT1G30490.1,AT1G52150.1,AT1G52150.2,AT1G52150.3,AT2G34710.1,AT4G32880.1,AT5G60690.1	7	0	0	1	0	0	SS	miR165/166	conserved family	2	n	9	n	0	n	9	n	0	n	3	AT1G52150,AT2G34710,AT4G32880	4	Abscisic acid,Cold,Flu (fluridone),Salt	1	Cold	1	1	0.988881
ath-miR165b	ath-miR166e-3p	conserved	Land plants	conserved	Land plants	7	AT1G30490.1,AT1G52150.1,AT1G52150.2,AT1G52150.3,AT2G34710.1,AT4G32880.1,AT5G60690.1	7	0	0	1	0	0	SS	miR165/166	conserved family	2	n	9	n	0	n	9	n	0	n	3	AT1G52150,AT2G34710,AT4G32880	4	Abscisic acid,Cold,Flu (fluridone),Salt	1	Cold	1	1	0.988881
ath-miR165b	ath-miR166f	conserved	Land plants	conserved	Land plants	7	AT1G30490.1,AT1G52150.1,AT1G52150.2,AT1G52150.3,AT2G34710.1,AT4G32880.1,AT5G60690.1	7	0	0	1	0	0	SS	miR165/166	conserved family	2	n	9	n	0	n	9	n	0	n	3	AT1G52150,AT2G34710,AT4G32880	4	Abscisic acid,Cold,Flu (fluridone),Salt	1	Cold	1	1	0.988881
ath-miR165b	ath-miR166g	conserved	Land plants	conserved	Land plants	7	AT1G30490.1,AT1G52150.1,AT1G52150.2,AT1G52150.3,AT2G34710.1,AT4G32880.1,AT5G60690.1	7	0	0	1	0	0	SS	miR165/166	conserved family	2	n	9	n	0	n	9	n	0	n	3	AT1G52150,AT2G34710,AT4G32880	4	Abscisic acid,Cold,Flu (fluridone),Salt	1	Cold	1	1	0.988881
ath-miR165b	ath-miR5021	conserved	Land plants	non-conserved	Arabidopsis thaliana	1	AT5G60690.1	0	0	1	0	0	1	SD	interfamily		248	n	9	n	0	n	54	y	0.660861	y	0		4	Abscisic acid,Cold,Flu (fluridone),Salt	0		0	0.445742
ath-miR166a-3p	ath-miR166b-3p	conserved	Land plants	conserved	Land plants	7	AT1G30490.1,AT1G52150.1,AT1G52150.2,AT1G52150.3,AT2G34710.1,AT4G32880.1,AT5G60690.1	7	0	0	1	0	0	SS	miR165/166	conserved family	2	n	9	n	0	n	9	n	0	n	3	AT1G52150,AT2G34710,AT4G32880	3	Cold,Ozone,Salt	2	Cold,Salt	2	1	1
ath-miR166a-3p	ath-miR166c	conserved	Land plants	conserved	Land plants	7	AT1G30490.1,AT1G52150.1,AT1G52150.2,AT1G52150.3,AT2G34710.1,AT4G32880.1,AT5G60690.1	7	0	0	1	0	0	SS	miR165/166	conserved family	2	n	9	n	0	n	9	n	0	n	3	AT1G52150,AT2G34710,AT4G32880	3	Cold,Ozone,Salt	1	Cold	1	1	1
ath-miR166a-3p	ath-miR166d	conserved	Land plants	conserved	Land plants	7	AT1G30490.1,AT1G52150.1,AT1G52150.2,AT1G52150.3,AT2G34710.1,AT4G32880.1,AT5G60690.1	7	0	0	1	0	0	SS	miR165/166	conserved family	2	n	9	n	0	n	9	n	0	n	3	AT1G52150,AT2G34710,AT4G32880	3	Cold,Ozone,Salt	1	Cold	1	1	1
ath-miR166a-3p	ath-miR166e-3p	conserved	Land plants	conserved	Land plants	7	AT1G30490.1,AT1G52150.1,AT1G52150.2,AT1G52150.3,AT2G34710.1,AT4G32880.1,AT5G60690.1	7	0	0	1	0	0	SS	miR165/166	conserved family	2	n	9	n	0	n	9	n	0	n	3	AT1G52150,AT2G34710,AT4G32880	3	Cold,Ozone,Salt	1	Cold	1	1	1
ath-miR166a-3p	ath-miR166f	conserved	Land plants	conserved	Land plants	7	AT1G30490.1,AT1G52150.1,AT1G52150.2,AT1G52150.3,AT2G34710.1,AT4G32880.1,AT5G60690.1	7	0	0	1	0	0	SS	miR165/166	conserved family	2	n	9	n	0	n	9	n	0	n	3	AT1G52150,AT2G34710,AT4G32880	3	Cold,Ozone,Salt	1	Cold	1	1	1
ath-miR166a-3p	ath-miR166g	conserved	Land plants	conserved	Land plants	7	AT1G30490.1,AT1G52150.1,AT1G52150.2,AT1G52150.3,AT2G34710.1,AT4G32880.1,AT5G60690.1	7	0	0	1	0	0	SS	miR165/166	conserved family	2	n	9	n	0	n	9	n	0	n	3	AT1G52150,AT2G34710,AT4G32880	3	Cold,Ozone,Salt	1	Cold	1	1	1
ath-miR166a-3p	ath-miR5021	conserved	Land plants	non-conserved	Arabidopsis thaliana	1	AT5G60690.1	0	0	1	0	0	1	SD	interfamily		248	n	9	n	0	n	54	y	0.660861	y	0		3	Cold,Ozone,Salt	0		0	0.445742
ath-miR166b-3p	ath-miR166c	conserved	Land plants	conserved	Land plants	7	AT1G30490.1,AT1G52150.1,AT1G52150.2,AT1G52150.3,AT2G34710.1,AT4G32880.1,AT5G60690.1	7	0	0	1	0	0	SS	miR165/166	conserved family	2	n	9	n	0	n	9	n	0	n	3	AT1G52150,AT2G34710,AT4G32880	2	Cold,Salt	1	Cold	1	1	1
ath-miR166b-3p	ath-miR166d	conserved	Land plants	conserved	Land plants	7	AT1G30490.1,AT1G52150.1,AT1G52150.2,AT1G52150.3,AT2G34710.1,AT4G32880.1,AT5G60690.1	7	0	0	1	0	0	SS	miR165/166	conserved family	2	n	9	n	0	n	9	n	0	n	3	AT1G52150,AT2G34710,AT4G32880	2	Cold,Salt	1	Cold	1	1	1
ath-miR166b-3p	ath-miR166e-3p	conserved	Land plants	conserved	Land plants	7	AT1G30490.1,AT1G52150.1,AT1G52150.2,AT1G52150.3,AT2G34710.1,AT4G32880.1,AT5G60690.1	7	0	0	1	0	0	SS	miR165/166	conserved family	2	n	9	n	0	n	9	n	0	n	3	AT1G52150,AT2G34710,AT4G32880	2	Cold,Salt	1	Cold	1	1	1
ath-miR166b-3p	ath-miR166f	conserved	Land plants	conserved	Land plants	7	AT1G30490.1,AT1G52150.1,AT1G52150.2,AT1G52150.3,AT2G34710.1,AT4G32880.1,AT5G60690.1	7	0	0	1	0	0	SS	miR165/166	conserved family	2	n	9	n	0	n	9	n	0	n	3	AT1G52150,AT2G34710,AT4G32880	2	Cold,Salt	1	Cold	1	1	1
ath-miR166b-3p	ath-miR166g	conserved	Land plants	conserved	Land plants	7	AT1G30490.1,AT1G52150.1,AT1G52150.2,AT1G52150.3,AT2G34710.1,AT4G32880.1,AT5G60690.1	7	0	0	1	0	0	SS	miR165/166	conserved family	2	n	9	n	0	n	9	n	0	n	3	AT1G52150,AT2G34710,AT4G32880	2	Cold,Salt	1	Cold	1	1	1
ath-miR166b-3p	ath-miR5021	conserved	Land plants	non-conserved	Arabidopsis thaliana	1	AT5G60690.1	0	0	1	0	0	1	SD	interfamily		248	n	9	n	0	n	54	y	0.660861	y	0		2	Cold,Salt	0		0	0.445742
ath-miR166c	ath-miR166d	conserved	Land plants	conserved	Land plants	7	AT1G30490.1,AT1G52150.1,AT1G52150.2,AT1G52150.3,AT2G34710.1,AT4G32880.1,AT5G60690.1	7	0	0	1	0	0	SS	miR165/166	conserved family	2	n	9	n	0	n	9	n	0	n	3	AT1G52150,AT2G34710,AT4G32880	1	Cold	1	Cold	1	1	1
ath-miR166c	ath-miR166e-3p	conserved	Land plants	conserved	Land plants	7	AT1G30490.1,AT1G52150.1,AT1G52150.2,AT1G52150.3,AT2G34710.1,AT4G32880.1,AT5G60690.1	7	0	0	1	0	0	SS	miR165/166	conserved family	2	n	9	n	0	n	9	n	0	n	3	AT1G52150,AT2G34710,AT4G32880	1	Cold	1	Cold	1	1	1
ath-miR166c	ath-miR166f	conserved	Land plants	conserved	Land plants	7	AT1G30490.1,AT1G52150.1,AT1G52150.2,AT1G52150.3,AT2G34710.1,AT4G32880.1,AT5G60690.1	7	0	0	1	0	0	SS	miR165/166	conserved family	2	n	9	n	0	n	9	n	0	n	3	AT1G52150,AT2G34710,AT4G32880	1	Cold	1	Cold	1	1	1
ath-miR166c	ath-miR166g	conserved	Land plants	conserved	Land plants	7	AT1G30490.1,AT1G52150.1,AT1G52150.2,AT1G52150.3,AT2G34710.1,AT4G32880.1,AT5G60690.1	7	0	0	1	0	0	SS	miR165/166	conserved family	2	n	9	n	0	n	9	n	0	n	3	AT1G52150,AT2G34710,AT4G32880	1	Cold	1	Cold	1	1	1
ath-miR166c	ath-miR5021	conserved	Land plants	non-conserved	Arabidopsis thaliana	1	AT5G60690.1	0	0	1	0	0	1	SD	interfamily		248	n	9	n	0	n	54	y	0.660861	y	0		1	Cold	0		0	0.445742
ath-miR166d	ath-miR166e-3p	conserved	Land plants	conserved	Land plants	7	AT1G30490.1,AT1G52150.1,AT1G52150.2,AT1G52150.3,AT2G34710.1,AT4G32880.1,AT5G60690.1	7	0	0	1	0	0	SS	miR165/166	conserved family	2	n	9	n	0	n	9	n	0	n	3	AT1G52150,AT2G34710,AT4G32880	1	Cold	1	Cold	1	1	1
ath-miR166d	ath-miR166f	conserved	Land plants	conserved	Land plants	7	AT1G30490.1,AT1G52150.1,AT1G52150.2,AT1G52150.3,AT2G34710.1,AT4G32880.1,AT5G60690.1	7	0	0	1	0	0	SS	miR165/166	conserved family	2	n	9	n	0	n	9	n	0	n	3	AT1G52150,AT2G34710,AT4G32880	1	Cold	1	Cold	1	1	1
ath-miR166d	ath-miR166g	conserved	Land plants	conserved	Land plants	7	AT1G30490.1,AT1G52150.1,AT1G52150.2,AT1G52150.3,AT2G34710.1,AT4G32880.1,AT5G60690.1	7	0	0	1	0	0	SS	miR165/166	conserved family	2	n	9	n	0	n	9	n	0	n	3	AT1G52150,AT2G34710,AT4G32880	1	Cold	1	Cold	1	1	1
ath-miR166d	ath-miR5021	conserved	Land plants	non-conserved	Arabidopsis thaliana	1	AT5G60690.1	0	0	1	0	0	1	SD	interfamily		248	n	9	n	0	n	54	y	0.660861	y	0		1	Cold	0		0	0.445742
ath-miR166e-3p	ath-miR166f	conserved	Land plants	conserved	Land plants	7	AT1G30490.1,AT1G52150.1,AT1G52150.2,AT1G52150.3,AT2G34710.1,AT4G32880.1,AT5G60690.1	7	0	0	1	0	0	SS	miR165/166	conserved family	2	n	9	n	0	n	9	n	0	n	3	AT1G52150,AT2G34710,AT4G32880	1	Cold	1	Cold	1	1	1
ath-miR166e-3p	ath-miR166g	conserved	Land plants	conserved	Land plants	7	AT1G30490.1,AT1G52150.1,AT1G52150.2,AT1G52150.3,AT2G34710.1,AT4G32880.1,AT5G60690.1	7	0	0	1	0	0	SS	miR165/166	conserved family	2	n	9	n	0	n	9	n	0	n	3	AT1G52150,AT2G34710,AT4G32880	1	Cold	1	Cold	1	1	1
ath-miR166e-3p	ath-miR5021	conserved	Land plants	non-conserved	Arabidopsis thaliana	1	AT5G60690.1	0	0	1	0	0	1	SD	interfamily		248	n	9	n	0	n	54	y	0.660861	y	0		1	Cold	0		0	0.445742
ath-miR166f	ath-miR166g	conserved	Land plants	conserved	Land plants	7	AT1G30490.1,AT1G52150.1,AT1G52150.2,AT1G52150.3,AT2G34710.1,AT4G32880.1,AT5G60690.1	7	0	0	1	0	0	SS	miR165/166	conserved family	2	n	9	n	0	n	9	n	0	n	3	AT1G52150,AT2G34710,AT4G32880	1	Cold	1	Cold	1	1	1
ath-miR166f	ath-miR5021	conserved	Land plants	non-conserved	Arabidopsis thaliana	1	AT5G60690.1	0	0	1	0	0	1	SD	interfamily		248	n	9	n	0	n	54	y	0.660861	y	0		1	Cold	0		0	0.445742
ath-miR166g	ath-miR5021	conserved	Land plants	non-conserved	Arabidopsis thaliana	1	AT5G60690.1	0	0	1	0	0	1	SD	interfamily		248	n	9	n	0	n	54	y	0.660861	y	0		1	Cold	0		0	0.445742
ath-miR167a-5p	ath-miR167b	conserved	Seed plants	conserved	Seed plants	3	AT5G37020.1,AT5G37020.2,AT5G37020.3	3	0	0	1	0	0	SS	miR167	conserved family	2	n	2	n	0	n	2	n	0	n	1	AT5G37020	5	Brassinosteroid,Drought,Osmotic stress,Ozone,Salt	3	Drought,Osmotic stress,Salt	3	1	1
ath-miR167a-5p	ath-miR167c-5p	conserved	Seed plants	conserved	Rosids	3	AT5G37020.1,AT5G37020.2,AT5G37020.3	3	0	0	1	0	0	SS	miR167	conserved family	2	n	2	n	0	n	2	n	0	n	1	AT5G37020	5	Brassinosteroid,Drought,Osmotic stress,Ozone,Salt	2	Drought,Salt	2	0.842833	0.731701
ath-miR167b	ath-miR167c-5p	conserved	Seed plants	conserved	Rosids	3	AT5G37020.1,AT5G37020.2,AT5G37020.3	3	0	0	1	0	0	SS	miR167	conserved family	2	n	2	n	0	n	2	n	0	n	1	AT5G37020	3	Drought,Osmotic stress,Salt	2	Drought,Salt	2	0.842833	0.731701
ath-miR168a-5p	ath-miR168b-5p	conserved	Seed plants	conserved	Seed plants	3	AT1G48410.1,AT1G48410.2,AT1G48410.3	0	0	3	0	0	1	SD	miR168	conserved family	2	n	1	n	0	n	1	n	0	n	1	AT1G48410	4	Cold,Drought,Fusarium oxysporum,Salt	4	Cold,Drought,Fusarium oxysporum,Salt	4	1	1
ath-miR169a-5p	ath-miR169b-5p	conserved	Seed plants	conserved	Seed plants	16	AT1G17590.1,AT1G17590.2,AT1G17590.3,AT1G17590.4,AT1G54160.1,AT1G72830.1,AT1G72830.2,AT1G72830.3,AT3G14020.1,AT3G14020.2,AT3G20910.1,AT5G12840.1,AT5G12840.2,AT5G12840.4,AT5G12840.5,AT5G42120.1	15	1	0	0.9375	0.0625	0	SS	miR169	conserved family	2	n	14	y	0.00229393	n	14	y	0.00229393	n	2	AT1G54160,AT5G42120	8	Abscisic acid,Brassinosteroid,Cold,Drought,Lipopolysaccharide,Nitrogen-deficiency,Pectobacterium carotovorum,Phosphate-deficiency	7	Cold,Drought,Ferrum deficiency,Lipopolysaccharide,Nitrogen-deficiency,Pectobacterium carotovorum,Phosphate-deficiency	6	0.993276	0.621282
ath-miR169a-5p	ath-miR169c	conserved	Seed plants	conserved	Seed plants	16	AT1G17590.1,AT1G17590.2,AT1G17590.3,AT1G17590.4,AT1G54160.1,AT1G72830.1,AT1G72830.2,AT1G72830.3,AT3G14020.1,AT3G14020.2,AT3G20910.1,AT5G12840.1,AT5G12840.2,AT5G12840.4,AT5G12840.5,AT5G42120.1	15	1	0	0.9375	0.0625	0	SS	miR169	conserved family	2	n	14	y	0.00229393	n	14	y	0.00229393	n	2	AT1G54160,AT5G42120	8	Abscisic acid,Brassinosteroid,Cold,Drought,Lipopolysaccharide,Nitrogen-deficiency,Pectobacterium carotovorum,Phosphate-deficiency	7	Cold,Drought,Ferrum deficiency,Lipopolysaccharide,Nitrogen-deficiency,Pectobacterium carotovorum,Phosphate-deficiency	6	0.993276	0.621282
ath-miR169a-5p	ath-miR169d	conserved	Seed plants	conserved	Flowering plants	8	AT1G54160.1,AT3G14020.1,AT3G14020.2,AT3G20910.1,AT5G12840.1,AT5G12840.2,AT5G12840.4,AT5G12840.5	4	0	4	0.5	0	0.5	NA	miR169	conserved family	21.8333	n	14	y	0.00229393	n	13	y	0	n	1	AT1G54160	8	Abscisic acid,Brassinosteroid,Cold,Drought,Lipopolysaccharide,Nitrogen-deficiency,Pectobacterium carotovorum,Phosphate-deficiency	7	Cold,Drought,Gamma-irradiated,Lipopolysaccharide,Nitrogen-deficiency,Pectobacterium carotovorum,Phosphate-deficiency	6	0.892219	-0.00112712
ath-miR169a-5p	ath-miR169e	conserved	Seed plants	conserved	Flowering plants	8	AT1G54160.1,AT3G14020.1,AT3G14020.2,AT3G20910.1,AT5G12840.1,AT5G12840.2,AT5G12840.4,AT5G12840.5	8	0	0	1	0	0	SS	miR169	conserved family	2	n	14	y	0.00229393	n	14	y	0.00229393	n	1	AT1G54160	8	Abscisic acid,Brassinosteroid,Cold,Drought,Lipopolysaccharide,Nitrogen-deficiency,Pectobacterium carotovorum,Phosphate-deficiency	6	Cold,Drought,Lipopolysaccharide,Nitrogen-deficiency,Pectobacterium carotovorum,Phosphate-deficiency	6	0.892219	-0.00112712
ath-miR169a-5p	ath-miR169f-5p	conserved	Seed plants	conserved	Flowering plants	8	AT1G54160.1,AT3G14020.1,AT3G14020.2,AT3G20910.1,AT5G12840.1,AT5G12840.2,AT5G12840.4,AT5G12840.5	8	0	0	1	0	0	SS	miR169	conserved family	2	n	14	y	0.00229393	n	14	y	0.00229393	n	1	AT1G54160	8	Abscisic acid,Brassinosteroid,Cold,Drought,Lipopolysaccharide,Nitrogen-deficiency,Pectobacterium carotovorum,Phosphate-deficiency	6	Cold,Drought,Lipopolysaccharide,Nitrogen-deficiency,Pectobacterium carotovorum,Phosphate-deficiency	6	0.892219	0.181062
ath-miR169a-5p	ath-miR169g-5p	conserved	Seed plants	conserved	Flowering plants	8	AT1G54160.1,AT3G14020.1,AT3G14020.2,AT3G20910.1,AT5G12840.1,AT5G12840.2,AT5G12840.4,AT5G12840.5	0	0	8	0	0	1	SD	miR169	conserved family	21.8333	n	14	y	0.00229393	n	13	y	0	n	1	AT1G54160	8	Abscisic acid,Brassinosteroid,Cold,Drought,Lipopolysaccharide,Nitrogen-deficiency,Pectobacterium carotovorum,Phosphate-deficiency	6	Cold,Drought,Lipopolysaccharide,Nitrogen-deficiency,Pectobacterium carotovorum,Phosphate-deficiency	6	0.892219	-0.00112712
ath-miR169a-5p	ath-miR169h	conserved	Seed plants	conserved	Seed plants	14	AT1G17590.1,AT1G17590.2,AT1G17590.3,AT1G17590.4,AT1G54160.1,AT1G72830.1,AT1G72830.2,AT1G72830.3,AT3G14020.1,AT3G14020.2,AT5G12840.1,AT5G12840.2,AT5G12840.4,AT5G12840.5	14	0	0	1	0	0	SS	miR169	conserved family	2	n	14	y	0.00229393	n	14	y	0.00229393	n	1	AT1G54160	8	Abscisic acid,Brassinosteroid,Cold,Drought,Lipopolysaccharide,Nitrogen-deficiency,Pectobacterium carotovorum,Phosphate-deficiency	7	Cold,Drought,Gamma-irradiated,Lipopolysaccharide,Nitrogen-deficiency,Pectobacterium carotovorum,Phosphate-deficiency	6	0.934753	0.476378
ath-miR169a-5p	ath-miR169i	conserved	Seed plants	conserved	Seed plants	14	AT1G17590.1,AT1G17590.2,AT1G17590.3,AT1G17590.4,AT1G54160.1,AT1G72830.1,AT1G72830.2,AT1G72830.3,AT3G14020.1,AT3G14020.2,AT5G12840.1,AT5G12840.2,AT5G12840.4,AT5G12840.5	14	0	0	1	0	0	SS	miR169	conserved family	2	n	14	y	0.00229393	n	14	y	0.00229393	n	1	AT1G54160	8	Abscisic acid,Brassinosteroid,Cold,Drought,Lipopolysaccharide,Nitrogen-deficiency,Pectobacterium carotovorum,Phosphate-deficiency	6	Cold,Drought,Lipopolysaccharide,Nitrogen-deficiency,Pectobacterium carotovorum,Phosphate-deficiency	6	0.934753	0.889969
ath-miR169a-5p	ath-miR169j	conserved	Seed plants	conserved	Seed plants	10	AT1G17590.1,AT1G17590.2,AT1G17590.3,AT1G17590.4,AT1G54160.1,AT1G72830.1,AT1G72830.2,AT1G72830.3,AT3G14020.1,AT3G14020.2	10	0	0	1	0	0	SS	miR169	conserved family	2	n	14	y	0.00229393	n	14	y	0.00229393	n	1	AT1G54160	8	Abscisic acid,Brassinosteroid,Cold,Drought,Lipopolysaccharide,Nitrogen-deficiency,Pectobacterium carotovorum,Phosphate-deficiency	6	Cold,Drought,Lipopolysaccharide,Nitrogen-deficiency,Pectobacterium carotovorum,Phosphate-deficiency	6	0.934753	0.889969
ath-miR169a-5p	ath-miR169k	conserved	Seed plants	conserved	Seed plants	14	AT1G17590.1,AT1G17590.2,AT1G17590.3,AT1G17590.4,AT1G54160.1,AT1G72830.1,AT1G72830.2,AT1G72830.3,AT3G14020.1,AT3G14020.2,AT5G12840.1,AT5G12840.2,AT5G12840.4,AT5G12840.5	14	0	0	1	0	0	SS	miR169	conserved family	2	n	14	y	0.00229393	n	14	y	0.00229393	n	1	AT1G54160	8	Abscisic acid,Brassinosteroid,Cold,Drought,Lipopolysaccharide,Nitrogen-deficiency,Pectobacterium carotovorum,Phosphate-deficiency	6	Cold,Drought,Lipopolysaccharide,Nitrogen-deficiency,Pectobacterium carotovorum,Phosphate-deficiency	6	0.934753	0.476378
ath-miR169a-5p	ath-miR169l	conserved	Seed plants	conserved	Seed plants	14	AT1G17590.1,AT1G17590.2,AT1G17590.3,AT1G17590.4,AT1G54160.1,AT1G72830.1,AT1G72830.2,AT1G72830.3,AT3G14020.1,AT3G14020.2,AT5G12840.1,AT5G12840.2,AT5G12840.4,AT5G12840.5	14	0	0	1	0	0	SS	miR169	conserved family	2	n	14	y	0.00229393	n	14	y	0.00229393	n	1	AT1G54160	8	Abscisic acid,Brassinosteroid,Cold,Drought,Lipopolysaccharide,Nitrogen-deficiency,Pectobacterium carotovorum,Phosphate-deficiency	6	Cold,Drought,Lipopolysaccharide,Nitrogen-deficiency,Pectobacterium carotovorum,Phosphate-deficiency	6	0.934753	0.889969
ath-miR169a-5p	ath-miR169m	conserved	Seed plants	conserved	Seed plants	14	AT1G17590.1,AT1G17590.2,AT1G17590.3,AT1G17590.4,AT1G54160.1,AT1G72830.1,AT1G72830.2,AT1G72830.3,AT3G14020.1,AT3G14020.2,AT5G12840.1,AT5G12840.2,AT5G12840.4,AT5G12840.5	14	0	0	1	0	0	SS	miR169	conserved family	2	n	14	y	0.00229393	n	14	y	0.00229393	n	1	AT1G54160	8	Abscisic acid,Brassinosteroid,Cold,Drought,Lipopolysaccharide,Nitrogen-deficiency,Pectobacterium carotovorum,Phosphate-deficiency	6	Cold,Drought,Lipopolysaccharide,Nitrogen-deficiency,Pectobacterium carotovorum,Phosphate-deficiency	6	0.934753	0.476378
ath-miR169a-5p	ath-miR169n	conserved	Seed plants	conserved	Seed plants	14	AT1G17590.1,AT1G17590.2,AT1G17590.3,AT1G17590.4,AT1G54160.1,AT1G72830.1,AT1G72830.2,AT1G72830.3,AT3G14020.1,AT3G14020.2,AT5G12840.1,AT5G12840.2,AT5G12840.4,AT5G12840.5	10	0	4	0.714286	0	0.285714	SS	miR169	conserved family	2	n	14	y	0.00229393	n	14	y	0.00229393	n	1	AT1G54160	8	Abscisic acid,Brassinosteroid,Cold,Drought,Lipopolysaccharide,Nitrogen-deficiency,Pectobacterium carotovorum,Phosphate-deficiency	6	Cold,Drought,Lipopolysaccharide,Nitrogen-deficiency,Pectobacterium carotovorum,Phosphate-deficiency	6	0.934753	0.889969
ath-miR169a-5p	ath-miR5658	conserved	Seed plants	non-conserved	Arabidopsis thaliana	1	AT1G54160.1	0	0	1	0	0	1	SD	interfamily		277.667	y	14	y	0.00229393	n	46	y	0.431559	y	1	AT1G54160	8	Abscisic acid,Brassinosteroid,Cold,Drought,Lipopolysaccharide,Nitrogen-deficiency,Pectobacterium carotovorum,Phosphate-deficiency	0		0	0.55722	0.220292
ath-miR169b-5p	ath-miR169c	conserved	Seed plants	conserved	Seed plants	21	AT1G17590.1,AT1G17590.2,AT1G17590.3,AT1G17590.4,AT1G54160.1,AT1G72830.1,AT1G72830.2,AT1G72830.3,AT3G05690.1,AT3G05690.2,AT3G14020.1,AT3G14020.2,AT3G20910.1,AT5G06510.2,AT5G06510.3,AT5G06510.6,AT5G12840.1,AT5G12840.2,AT5G12840.4,AT5G12840.5,AT5G42120.1	20	1	0	0.952381	0.047619	0	SS	miR169	conserved family	2	n	14	y	0.00229393	n	14	y	0.00229393	n	2	AT1G54160,AT5G42120	7	Cold,Drought,Ferrum deficiency,Lipopolysaccharide,Nitrogen-deficiency,Pectobacterium carotovorum,Phosphate-deficiency	7	Cold,Drought,Ferrum deficiency,Lipopolysaccharide,Nitrogen-deficiency,Pectobacterium carotovorum,Phosphate-deficiency	7	1	1
ath-miR169b-5p	ath-miR169d	conserved	Seed plants	conserved	Flowering plants	13	AT1G54160.1,AT3G05690.1,AT3G05690.2,AT3G14020.1,AT3G14020.2,AT3G20910.1,AT5G06510.2,AT5G06510.3,AT5G06510.6,AT5G12840.1,AT5G12840.2,AT5G12840.4,AT5G12840.5	9	0	4	0.692308	0	0.307692	SS	miR169	conserved family	21.8333	n	14	y	0.00229393	n	13	y	0	n	1	AT1G54160	7	Cold,Drought,Ferrum deficiency,Lipopolysaccharide,Nitrogen-deficiency,Pectobacterium carotovorum,Phosphate-deficiency	7	Cold,Drought,Gamma-irradiated,Lipopolysaccharide,Nitrogen-deficiency,Pectobacterium carotovorum,Phosphate-deficiency	6	0.890253	-0.225356
ath-miR169b-5p	ath-miR169e	conserved	Seed plants	conserved	Flowering plants	13	AT1G54160.1,AT3G05690.1,AT3G05690.2,AT3G14020.1,AT3G14020.2,AT3G20910.1,AT5G06510.2,AT5G06510.3,AT5G06510.6,AT5G12840.1,AT5G12840.2,AT5G12840.4,AT5G12840.5	13	0	0	1	0	0	SS	miR169	conserved family	2	n	14	y	0.00229393	n	14	y	0.00229393	n	1	AT1G54160	7	Cold,Drought,Ferrum deficiency,Lipopolysaccharide,Nitrogen-deficiency,Pectobacterium carotovorum,Phosphate-deficiency	6	Cold,Drought,Lipopolysaccharide,Nitrogen-deficiency,Pectobacterium carotovorum,Phosphate-deficiency	6	0.890253	-0.225356
ath-miR169b-5p	ath-miR169f-5p	conserved	Seed plants	conserved	Flowering plants	13	AT1G54160.1,AT3G05690.1,AT3G05690.2,AT3G14020.1,AT3G14020.2,AT3G20910.1,AT5G06510.2,AT5G06510.3,AT5G06510.6,AT5G12840.1,AT5G12840.2,AT5G12840.4,AT5G12840.5	13	0	0	1	0	0	SS	miR169	conserved family	2	n	14	y	0.00229393	n	14	y	0.00229393	n	1	AT1G54160	7	Cold,Drought,Ferrum deficiency,Lipopolysaccharide,Nitrogen-deficiency,Pectobacterium carotovorum,Phosphate-deficiency	6	Cold,Drought,Lipopolysaccharide,Nitrogen-deficiency,Pectobacterium carotovorum,Phosphate-deficiency	6	0.890253	-0.17571
ath-miR169b-5p	ath-miR169g-5p	conserved	Seed plants	conserved	Flowering plants	13	AT1G54160.1,AT3G05690.1,AT3G05690.2,AT3G14020.1,AT3G14020.2,AT3G20910.1,AT5G06510.2,AT5G06510.3,AT5G06510.6,AT5G12840.1,AT5G12840.2,AT5G12840.4,AT5G12840.5	0	0	13	0	0	1	SD	miR169	conserved family	21.8333	n	14	y	0.00229393	n	13	y	0	n	1	AT1G54160	7	Cold,Drought,Ferrum deficiency,Lipopolysaccharide,Nitrogen-deficiency,Pectobacterium carotovorum,Phosphate-deficiency	6	Cold,Drought,Lipopolysaccharide,Nitrogen-deficiency,Pectobacterium carotovorum,Phosphate-deficiency	6	0.890253	-0.225356
ath-miR169b-5p	ath-miR169h	conserved	Seed plants	conserved	Seed plants	19	AT1G17590.1,AT1G17590.2,AT1G17590.3,AT1G17590.4,AT1G54160.1,AT1G72830.1,AT1G72830.2,AT1G72830.3,AT3G05690.1,AT3G05690.2,AT3G14020.1,AT3G14020.2,AT5G06510.2,AT5G06510.3,AT5G06510.6,AT5G12840.1,AT5G12840.2,AT5G12840.4,AT5G12840.5	19	0	0	1	0	0	SS	miR169	conserved family	2	n	14	y	0.00229393	n	14	y	0.00229393	n	1	AT1G54160	7	Cold,Drought,Ferrum deficiency,Lipopolysaccharide,Nitrogen-deficiency,Pectobacterium carotovorum,Phosphate-deficiency	7	Cold,Drought,Gamma-irradiated,Lipopolysaccharide,Nitrogen-deficiency,Pectobacterium carotovorum,Phosphate-deficiency	6	0.953349	0.260894
ath-miR169b-5p	ath-miR169i	conserved	Seed plants	conserved	Seed plants	19	AT1G17590.1,AT1G17590.2,AT1G17590.3,AT1G17590.4,AT1G54160.1,AT1G72830.1,AT1G72830.2,AT1G72830.3,AT3G05690.1,AT3G05690.2,AT3G14020.1,AT3G14020.2,AT5G06510.2,AT5G06510.3,AT5G06510.6,AT5G12840.1,AT5G12840.2,AT5G12840.4,AT5G12840.5	19	0	0	1	0	0	SS	miR169	conserved family	2	n	14	y	0.00229393	n	14	y	0.00229393	n	1	AT1G54160	7	Cold,Drought,Ferrum deficiency,Lipopolysaccharide,Nitrogen-deficiency,Pectobacterium carotovorum,Phosphate-deficiency	6	Cold,Drought,Lipopolysaccharide,Nitrogen-deficiency,Pectobacterium carotovorum,Phosphate-deficiency	6	0.953349	0.631359
ath-miR169b-5p	ath-miR169j	conserved	Seed plants	conserved	Seed plants	15	AT1G17590.1,AT1G17590.2,AT1G17590.3,AT1G17590.4,AT1G54160.1,AT1G72830.1,AT1G72830.2,AT1G72830.3,AT3G05690.1,AT3G05690.2,AT3G14020.1,AT3G14020.2,AT5G06510.2,AT5G06510.3,AT5G06510.6	15	0	0	1	0	0	SS	miR169	conserved family	2	n	14	y	0.00229393	n	14	y	0.00229393	n	1	AT1G54160	7	Cold,Drought,Ferrum deficiency,Lipopolysaccharide,Nitrogen-deficiency,Pectobacterium carotovorum,Phosphate-deficiency	6	Cold,Drought,Lipopolysaccharide,Nitrogen-deficiency,Pectobacterium carotovorum,Phosphate-deficiency	6	0.953349	0.631359
ath-miR169b-5p	ath-miR169k	conserved	Seed plants	conserved	Seed plants	19	AT1G17590.1,AT1G17590.2,AT1G17590.3,AT1G17590.4,AT1G54160.1,AT1G72830.1,AT1G72830.2,AT1G72830.3,AT3G05690.1,AT3G05690.2,AT3G14020.1,AT3G14020.2,AT5G06510.2,AT5G06510.3,AT5G06510.6,AT5G12840.1,AT5G12840.2,AT5G12840.4,AT5G12840.5	19	0	0	1	0	0	SS	miR169	conserved family	2	n	14	y	0.00229393	n	14	y	0.00229393	n	1	AT1G54160	7	Cold,Drought,Ferrum deficiency,Lipopolysaccharide,Nitrogen-deficiency,Pectobacterium carotovorum,Phosphate-deficiency	6	Cold,Drought,Lipopolysaccharide,Nitrogen-deficiency,Pectobacterium carotovorum,Phosphate-deficiency	6	0.953349	0.260894
ath-miR169b-5p	ath-miR169l	conserved	Seed plants	conserved	Seed plants	19	AT1G17590.1,AT1G17590.2,AT1G17590.3,AT1G17590.4,AT1G54160.1,AT1G72830.1,AT1G72830.2,AT1G72830.3,AT3G05690.1,AT3G05690.2,AT3G14020.1,AT3G14020.2,AT5G06510.2,AT5G06510.3,AT5G06510.6,AT5G12840.1,AT5G12840.2,AT5G12840.4,AT5G12840.5	19	0	0	1	0	0	SS	miR169	conserved family	2	n	14	y	0.00229393	n	14	y	0.00229393	n	1	AT1G54160	7	Cold,Drought,Ferrum deficiency,Lipopolysaccharide,Nitrogen-deficiency,Pectobacterium carotovorum,Phosphate-deficiency	6	Cold,Drought,Lipopolysaccharide,Nitrogen-deficiency,Pectobacterium carotovorum,Phosphate-deficiency	6	0.953349	0.631359
ath-miR169b-5p	ath-miR169m	conserved	Seed plants	conserved	Seed plants	19	AT1G17590.1,AT1G17590.2,AT1G17590.3,AT1G17590.4,AT1G54160.1,AT1G72830.1,AT1G72830.2,AT1G72830.3,AT3G05690.1,AT3G05690.2,AT3G14020.1,AT3G14020.2,AT5G06510.2,AT5G06510.3,AT5G06510.6,AT5G12840.1,AT5G12840.2,AT5G12840.4,AT5G12840.5	19	0	0	1	0	0	SS	miR169	conserved family	2	n	14	y	0.00229393	n	14	y	0.00229393	n	1	AT1G54160	7	Cold,Drought,Ferrum deficiency,Lipopolysaccharide,Nitrogen-deficiency,Pectobacterium carotovorum,Phosphate-deficiency	6	Cold,Drought,Lipopolysaccharide,Nitrogen-deficiency,Pectobacterium carotovorum,Phosphate-deficiency	6	0.953349	0.260894
ath-miR169b-5p	ath-miR169n	conserved	Seed plants	conserved	Seed plants	19	AT1G17590.1,AT1G17590.2,AT1G17590.3,AT1G17590.4,AT1G54160.1,AT1G72830.1,AT1G72830.2,AT1G72830.3,AT3G05690.1,AT3G05690.2,AT3G14020.1,AT3G14020.2,AT5G06510.2,AT5G06510.3,AT5G06510.6,AT5G12840.1,AT5G12840.2,AT5G12840.4,AT5G12840.5	15	0	4	0.789474	0	0.210526	SS	miR169	conserved family	2	n	14	y	0.00229393	n	14	y	0.00229393	n	1	AT1G54160	7	Cold,Drought,Ferrum deficiency,Lipopolysaccharide,Nitrogen-deficiency,Pectobacterium carotovorum,Phosphate-deficiency	6	Cold,Drought,Lipopolysaccharide,Nitrogen-deficiency,Pectobacterium carotovorum,Phosphate-deficiency	6	0.953349	0.631359
ath-miR169b-5p	ath-miR5658	conserved	Seed plants	non-conserved	Arabidopsis thaliana	1	AT1G54160.1	0	0	1	0	0	1	SD	interfamily		277.667	y	14	y	0.00229393	n	46	y	0.431559	y	1	AT1G54160	7	Cold,Drought,Ferrum deficiency,Lipopolysaccharide,Nitrogen-deficiency,Pectobacterium carotovorum,Phosphate-deficiency	0		0	0.550051	-0.149385
ath-miR169c	ath-miR169d	conserved	Seed plants	conserved	Flowering plants	13	AT1G54160.1,AT3G05690.1,AT3G05690.2,AT3G14020.1,AT3G14020.2,AT3G20910.1,AT5G06510.2,AT5G06510.3,AT5G06510.6,AT5G12840.1,AT5G12840.2,AT5G12840.4,AT5G12840.5	9	0	4	0.692308	0	0.307692	SS	miR169	conserved family	21.8333	n	14	y	0.00229393	n	13	y	0	n	1	AT1G54160	7	Cold,Drought,Ferrum deficiency,Lipopolysaccharide,Nitrogen-deficiency,Pectobacterium carotovorum,Phosphate-deficiency	7	Cold,Drought,Gamma-irradiated,Lipopolysaccharide,Nitrogen-deficiency,Pectobacterium carotovorum,Phosphate-deficiency	6	0.890253	-0.225356
ath-miR169c	ath-miR169e	conserved	Seed plants	conserved	Flowering plants	13	AT1G54160.1,AT3G05690.1,AT3G05690.2,AT3G14020.1,AT3G14020.2,AT3G20910.1,AT5G06510.2,AT5G06510.3,AT5G06510.6,AT5G12840.1,AT5G12840.2,AT5G12840.4,AT5G12840.5	13	0	0	1	0	0	SS	miR169	conserved family	2	n	14	y	0.00229393	n	14	y	0.00229393	n	1	AT1G54160	7	Cold,Drought,Ferrum deficiency,Lipopolysaccharide,Nitrogen-deficiency,Pectobacterium carotovorum,Phosphate-deficiency	6	Cold,Drought,Lipopolysaccharide,Nitrogen-deficiency,Pectobacterium carotovorum,Phosphate-deficiency	6	0.890253	-0.225356
ath-miR169c	ath-miR169f-5p	conserved	Seed plants	conserved	Flowering plants	13	AT1G54160.1,AT3G05690.1,AT3G05690.2,AT3G14020.1,AT3G14020.2,AT3G20910.1,AT5G06510.2,AT5G06510.3,AT5G06510.6,AT5G12840.1,AT5G12840.2,AT5G12840.4,AT5G12840.5	13	0	0	1	0	0	SS	miR169	conserved family	2	n	14	y	0.00229393	n	14	y	0.00229393	n	1	AT1G54160	7	Cold,Drought,Ferrum deficiency,Lipopolysaccharide,Nitrogen-deficiency,Pectobacterium carotovorum,Phosphate-deficiency	6	Cold,Drought,Lipopolysaccharide,Nitrogen-deficiency,Pectobacterium carotovorum,Phosphate-deficiency	6	0.890253	-0.17571
ath-miR169c	ath-miR169g-5p	conserved	Seed plants	conserved	Flowering plants	13	AT1G54160.1,AT3G05690.1,AT3G05690.2,AT3G14020.1,AT3G14020.2,AT3G20910.1,AT5G06510.2,AT5G06510.3,AT5G06510.6,AT5G12840.1,AT5G12840.2,AT5G12840.4,AT5G12840.5	0	0	13	0	0	1	SD	miR169	conserved family	21.8333	n	14	y	0.00229393	n	13	y	0	n	1	AT1G54160	7	Cold,Drought,Ferrum deficiency,Lipopolysaccharide,Nitrogen-deficiency,Pectobacterium carotovorum,Phosphate-deficiency	6	Cold,Drought,Lipopolysaccharide,Nitrogen-deficiency,Pectobacterium carotovorum,Phosphate-deficiency	6	0.890253	-0.225356
ath-miR169c	ath-miR169h	conserved	Seed plants	conserved	Seed plants	19	AT1G17590.1,AT1G17590.2,AT1G17590.3,AT1G17590.4,AT1G54160.1,AT1G72830.1,AT1G72830.2,AT1G72830.3,AT3G05690.1,AT3G05690.2,AT3G14020.1,AT3G14020.2,AT5G06510.2,AT5G06510.3,AT5G06510.6,AT5G12840.1,AT5G12840.2,AT5G12840.4,AT5G12840.5	19	0	0	1	0	0	SS	miR169	conserved family	2	n	14	y	0.00229393	n	14	y	0.00229393	n	1	AT1G54160	7	Cold,Drought,Ferrum deficiency,Lipopolysaccharide,Nitrogen-deficiency,Pectobacterium carotovorum,Phosphate-deficiency	7	Cold,Drought,Gamma-irradiated,Lipopolysaccharide,Nitrogen-deficiency,Pectobacterium carotovorum,Phosphate-deficiency	6	0.953349	0.260894
ath-miR169c	ath-miR169i	conserved	Seed plants	conserved	Seed plants	19	AT1G17590.1,AT1G17590.2,AT1G17590.3,AT1G17590.4,AT1G54160.1,AT1G72830.1,AT1G72830.2,AT1G72830.3,AT3G05690.1,AT3G05690.2,AT3G14020.1,AT3G14020.2,AT5G06510.2,AT5G06510.3,AT5G06510.6,AT5G12840.1,AT5G12840.2,AT5G12840.4,AT5G12840.5	19	0	0	1	0	0	SS	miR169	conserved family	2	n	14	y	0.00229393	n	14	y	0.00229393	n	1	AT1G54160	7	Cold,Drought,Ferrum deficiency,Lipopolysaccharide,Nitrogen-deficiency,Pectobacterium carotovorum,Phosphate-deficiency	6	Cold,Drought,Lipopolysaccharide,Nitrogen-deficiency,Pectobacterium carotovorum,Phosphate-deficiency	6	0.953349	0.631359
ath-miR169c	ath-miR169j	conserved	Seed plants	conserved	Seed plants	15	AT1G17590.1,AT1G17590.2,AT1G17590.3,AT1G17590.4,AT1G54160.1,AT1G72830.1,AT1G72830.2,AT1G72830.3,AT3G05690.1,AT3G05690.2,AT3G14020.1,AT3G14020.2,AT5G06510.2,AT5G06510.3,AT5G06510.6	15	0	0	1	0	0	SS	miR169	conserved family	2	n	14	y	0.00229393	n	14	y	0.00229393	n	1	AT1G54160	7	Cold,Drought,Ferrum deficiency,Lipopolysaccharide,Nitrogen-deficiency,Pectobacterium carotovorum,Phosphate-deficiency	6	Cold,Drought,Lipopolysaccharide,Nitrogen-deficiency,Pectobacterium carotovorum,Phosphate-deficiency	6	0.953349	0.631359
ath-miR169c	ath-miR169k	conserved	Seed plants	conserved	Seed plants	19	AT1G17590.1,AT1G17590.2,AT1G17590.3,AT1G17590.4,AT1G54160.1,AT1G72830.1,AT1G72830.2,AT1G72830.3,AT3G05690.1,AT3G05690.2,AT3G14020.1,AT3G14020.2,AT5G06510.2,AT5G06510.3,AT5G06510.6,AT5G12840.1,AT5G12840.2,AT5G12840.4,AT5G12840.5	19	0	0	1	0	0	SS	miR169	conserved family	2	n	14	y	0.00229393	n	14	y	0.00229393	n	1	AT1G54160	7	Cold,Drought,Ferrum deficiency,Lipopolysaccharide,Nitrogen-deficiency,Pectobacterium carotovorum,Phosphate-deficiency	6	Cold,Drought,Lipopolysaccharide,Nitrogen-deficiency,Pectobacterium carotovorum,Phosphate-deficiency	6	0.953349	0.260894
ath-miR169c	ath-miR169l	conserved	Seed plants	conserved	Seed plants	19	AT1G17590.1,AT1G17590.2,AT1G17590.3,AT1G17590.4,AT1G54160.1,AT1G72830.1,AT1G72830.2,AT1G72830.3,AT3G05690.1,AT3G05690.2,AT3G14020.1,AT3G14020.2,AT5G06510.2,AT5G06510.3,AT5G06510.6,AT5G12840.1,AT5G12840.2,AT5G12840.4,AT5G12840.5	19	0	0	1	0	0	SS	miR169	conserved family	2	n	14	y	0.00229393	n	14	y	0.00229393	n	1	AT1G54160	7	Cold,Drought,Ferrum deficiency,Lipopolysaccharide,Nitrogen-deficiency,Pectobacterium carotovorum,Phosphate-deficiency	6	Cold,Drought,Lipopolysaccharide,Nitrogen-deficiency,Pectobacterium carotovorum,Phosphate-deficiency	6	0.953349	0.631359
ath-miR169c	ath-miR169m	conserved	Seed plants	conserved	Seed plants	19	AT1G17590.1,AT1G17590.2,AT1G17590.3,AT1G17590.4,AT1G54160.1,AT1G72830.1,AT1G72830.2,AT1G72830.3,AT3G05690.1,AT3G05690.2,AT3G14020.1,AT3G14020.2,AT5G06510.2,AT5G06510.3,AT5G06510.6,AT5G12840.1,AT5G12840.2,AT5G12840.4,AT5G12840.5	19	0	0	1	0	0	SS	miR169	conserved family	2	n	14	y	0.00229393	n	14	y	0.00229393	n	1	AT1G54160	7	Cold,Drought,Ferrum deficiency,Lipopolysaccharide,Nitrogen-deficiency,Pectobacterium carotovorum,Phosphate-deficiency	6	Cold,Drought,Lipopolysaccharide,Nitrogen-deficiency,Pectobacterium carotovorum,Phosphate-deficiency	6	0.953349	0.260894
ath-miR169c	ath-miR169n	conserved	Seed plants	conserved	Seed plants	19	AT1G17590.1,AT1G17590.2,AT1G17590.3,AT1G17590.4,AT1G54160.1,AT1G72830.1,AT1G72830.2,AT1G72830.3,AT3G05690.1,AT3G05690.2,AT3G14020.1,AT3G14020.2,AT5G06510.2,AT5G06510.3,AT5G06510.6,AT5G12840.1,AT5G12840.2,AT5G12840.4,AT5G12840.5	15	0	4	0.789474	0	0.210526	SS	miR169	conserved family	2	n	14	y	0.00229393	n	14	y	0.00229393	n	1	AT1G54160	7	Cold,Drought,Ferrum deficiency,Lipopolysaccharide,Nitrogen-deficiency,Pectobacterium carotovorum,Phosphate-deficiency	6	Cold,Drought,Lipopolysaccharide,Nitrogen-deficiency,Pectobacterium carotovorum,Phosphate-deficiency	6	0.953349	0.631359
ath-miR169c	ath-miR5658	conserved	Seed plants	non-conserved	Arabidopsis thaliana	1	AT1G54160.1	0	0	1	0	0	1	SD	interfamily		277.667	y	14	y	0.00229393	n	46	y	0.431559	y	1	AT1G54160	7	Cold,Drought,Ferrum deficiency,Lipopolysaccharide,Nitrogen-deficiency,Pectobacterium carotovorum,Phosphate-deficiency	0		0	0.550051	-0.149385
ath-miR169d	ath-miR169e	conserved	Flowering plants	conserved	Flowering plants	14	AT1G54160.1,AT1G68560.1,AT3G05690.1,AT3G05690.2,AT3G14020.1,AT3G14020.2,AT3G20910.1,AT5G06510.2,AT5G06510.3,AT5G06510.6,AT5G12840.1,AT5G12840.2,AT5G12840.4,AT5G12840.5	9	1	4	0.642857	0.0714286	0.285714	SS	miR169	conserved family	21.8333	n	13	y	0	n	14	y	0.00229393	n	2	AT1G54160,AT1G68560	7	Cold,Drought,Gamma-irradiated,Lipopolysaccharide,Nitrogen-deficiency,Pectobacterium carotovorum,Phosphate-deficiency	6	Cold,Drought,Lipopolysaccharide,Nitrogen-deficiency,Pectobacterium carotovorum,Phosphate-deficiency	6	1	1
ath-miR169d	ath-miR169f-5p	conserved	Flowering plants	conserved	Flowering plants	14	AT1G54160.1,AT1G68560.1,AT3G05690.1,AT3G05690.2,AT3G14020.1,AT3G14020.2,AT3G20910.1,AT5G06510.2,AT5G06510.3,AT5G06510.6,AT5G12840.1,AT5G12840.2,AT5G12840.4,AT5G12840.5	9	1	4	0.642857	0.0714286	0.285714	SS	miR169	conserved family	21.8333	n	13	y	0	n	14	y	0.00229393	n	2	AT1G54160,AT1G68560	7	Cold,Drought,Gamma-irradiated,Lipopolysaccharide,Nitrogen-deficiency,Pectobacterium carotovorum,Phosphate-deficiency	6	Cold,Drought,Lipopolysaccharide,Nitrogen-deficiency,Pectobacterium carotovorum,Phosphate-deficiency	6	1	0.889924
ath-miR169d	ath-miR169g-5p	conserved	Flowering plants	conserved	Flowering plants	10	AT1G68560.1,AT3G05690.1,AT3G05690.2,AT5G06510.2,AT5G06510.3,AT5G06510.6,AT5G12840.1,AT5G12840.2,AT5G12840.4,AT5G12840.5	0	1	9	0	0.1	0.9	SD	miR169	conserved family	2	n	13	y	0	n	13	y	0	n	1	AT1G68560	7	Cold,Drought,Gamma-irradiated,Lipopolysaccharide,Nitrogen-deficiency,Pectobacterium carotovorum,Phosphate-deficiency	6	Cold,Drought,Lipopolysaccharide,Nitrogen-deficiency,Pectobacterium carotovorum,Phosphate-deficiency	6	1	1
ath-miR169d	ath-miR169h	conserved	Flowering plants	conserved	Seed plants	12	AT1G54160.1,AT3G05690.1,AT3G05690.2,AT3G14020.1,AT3G14020.2,AT5G06510.2,AT5G06510.3,AT5G06510.6,AT5G12840.1,AT5G12840.2,AT5G12840.4,AT5G12840.5	9	0	3	0.75	0	0.25	SS	miR169	conserved family	21.8333	n	13	y	0	n	14	y	0.00229393	n	1	AT1G54160	7	Cold,Drought,Gamma-irradiated,Lipopolysaccharide,Nitrogen-deficiency,Pectobacterium carotovorum,Phosphate-deficiency	7	Cold,Drought,Gamma-irradiated,Lipopolysaccharide,Nitrogen-deficiency,Pectobacterium carotovorum,Phosphate-deficiency	7	0.836416	0.843308
ath-miR169d	ath-miR169i	conserved	Flowering plants	conserved	Seed plants	12	AT1G54160.1,AT3G05690.1,AT3G05690.2,AT3G14020.1,AT3G14020.2,AT5G06510.2,AT5G06510.3,AT5G06510.6,AT5G12840.1,AT5G12840.2,AT5G12840.4,AT5G12840.5	9	0	3	0.75	0	0.25	SS	miR169	conserved family	21.8333	n	13	y	0	n	14	y	0.00229393	n	1	AT1G54160	7	Cold,Drought,Gamma-irradiated,Lipopolysaccharide,Nitrogen-deficiency,Pectobacterium carotovorum,Phosphate-deficiency	6	Cold,Drought,Lipopolysaccharide,Nitrogen-deficiency,Pectobacterium carotovorum,Phosphate-deficiency	6	0.836416	0.299021
ath-miR169d	ath-miR169j	conserved	Flowering plants	conserved	Seed plants	8	AT1G54160.1,AT3G05690.1,AT3G05690.2,AT3G14020.1,AT3G14020.2,AT5G06510.2,AT5G06510.3,AT5G06510.6	5	0	3	0.625	0	0.375	SS	miR169	conserved family	21.8333	n	13	y	0	n	14	y	0.00229393	n	1	AT1G54160	7	Cold,Drought,Gamma-irradiated,Lipopolysaccharide,Nitrogen-deficiency,Pectobacterium carotovorum,Phosphate-deficiency	6	Cold,Drought,Lipopolysaccharide,Nitrogen-deficiency,Pectobacterium carotovorum,Phosphate-deficiency	6	0.836416	0.299021
ath-miR169d	ath-miR169k	conserved	Flowering plants	conserved	Seed plants	12	AT1G54160.1,AT3G05690.1,AT3G05690.2,AT3G14020.1,AT3G14020.2,AT5G06510.2,AT5G06510.3,AT5G06510.6,AT5G12840.1,AT5G12840.2,AT5G12840.4,AT5G12840.5	9	0	3	0.75	0	0.25	SS	miR169	conserved family	21.8333	n	13	y	0	n	14	y	0.00229393	n	1	AT1G54160	7	Cold,Drought,Gamma-irradiated,Lipopolysaccharide,Nitrogen-deficiency,Pectobacterium carotovorum,Phosphate-deficiency	6	Cold,Drought,Lipopolysaccharide,Nitrogen-deficiency,Pectobacterium carotovorum,Phosphate-deficiency	6	0.836416	0.843308
ath-miR169d	ath-miR169l	conserved	Flowering plants	conserved	Seed plants	12	AT1G54160.1,AT3G05690.1,AT3G05690.2,AT3G14020.1,AT3G14020.2,AT5G06510.2,AT5G06510.3,AT5G06510.6,AT5G12840.1,AT5G12840.2,AT5G12840.4,AT5G12840.5	9	0	3	0.75	0	0.25	SS	miR169	conserved family	21.8333	n	13	y	0	n	14	y	0.00229393	n	1	AT1G54160	7	Cold,Drought,Gamma-irradiated,Lipopolysaccharide,Nitrogen-deficiency,Pectobacterium carotovorum,Phosphate-deficiency	6	Cold,Drought,Lipopolysaccharide,Nitrogen-deficiency,Pectobacterium carotovorum,Phosphate-deficiency	6	0.836416	0.299021
ath-miR169d	ath-miR169m	conserved	Flowering plants	conserved	Seed plants	12	AT1G54160.1,AT3G05690.1,AT3G05690.2,AT3G14020.1,AT3G14020.2,AT5G06510.2,AT5G06510.3,AT5G06510.6,AT5G12840.1,AT5G12840.2,AT5G12840.4,AT5G12840.5	9	0	3	0.75	0	0.25	SS	miR169	conserved family	21.8333	n	13	y	0	n	14	y	0.00229393	n	1	AT1G54160	7	Cold,Drought,Gamma-irradiated,Lipopolysaccharide,Nitrogen-deficiency,Pectobacterium carotovorum,Phosphate-deficiency	6	Cold,Drought,Lipopolysaccharide,Nitrogen-deficiency,Pectobacterium carotovorum,Phosphate-deficiency	6	0.836416	0.843308
ath-miR169d	ath-miR169n	conserved	Flowering plants	conserved	Seed plants	12	AT1G54160.1,AT3G05690.1,AT3G05690.2,AT3G14020.1,AT3G14020.2,AT5G06510.2,AT5G06510.3,AT5G06510.6,AT5G12840.1,AT5G12840.2,AT5G12840.4,AT5G12840.5	5	0	7	0.416667	0	0.583333	SD	miR169	conserved family	21.8333	n	13	y	0	n	14	y	0.00229393	n	1	AT1G54160	7	Cold,Drought,Gamma-irradiated,Lipopolysaccharide,Nitrogen-deficiency,Pectobacterium carotovorum,Phosphate-deficiency	6	Cold,Drought,Lipopolysaccharide,Nitrogen-deficiency,Pectobacterium carotovorum,Phosphate-deficiency	6	0.836416	0.299021
ath-miR169e	ath-miR169f-5p	conserved	Flowering plants	conserved	Flowering plants	14	AT1G54160.1,AT1G68560.1,AT3G05690.1,AT3G05690.2,AT3G14020.1,AT3G14020.2,AT3G20910.1,AT5G06510.2,AT5G06510.3,AT5G06510.6,AT5G12840.1,AT5G12840.2,AT5G12840.4,AT5G12840.5	13	1	0	0.928571	0.0714286	0	SS	miR169	conserved family	2	n	14	y	0.00229393	n	14	y	0.00229393	n	2	AT1G54160,AT1G68560	6	Cold,Drought,Lipopolysaccharide,Nitrogen-deficiency,Pectobacterium carotovorum,Phosphate-deficiency	6	Cold,Drought,Lipopolysaccharide,Nitrogen-deficiency,Pectobacterium carotovorum,Phosphate-deficiency	6	1	0.889924
ath-miR169e	ath-miR169g-5p	conserved	Flowering plants	conserved	Flowering plants	14	AT1G54160.1,AT1G68560.1,AT3G05690.1,AT3G05690.2,AT3G14020.1,AT3G14020.2,AT3G20910.1,AT5G06510.2,AT5G06510.3,AT5G06510.6,AT5G12840.1,AT5G12840.2,AT5G12840.4,AT5G12840.5	0	1	13	0	0.0714286	0.928571	SD	miR169	conserved family	21.8333	n	14	y	0.00229393	n	13	y	0	n	2	AT1G54160,AT1G68560	6	Cold,Drought,Lipopolysaccharide,Nitrogen-deficiency,Pectobacterium carotovorum,Phosphate-deficiency	6	Cold,Drought,Lipopolysaccharide,Nitrogen-deficiency,Pectobacterium carotovorum,Phosphate-deficiency	6	1	1
ath-miR169e	ath-miR169h	conserved	Flowering plants	conserved	Seed plants	12	AT1G54160.1,AT3G05690.1,AT3G05690.2,AT3G14020.1,AT3G14020.2,AT5G06510.2,AT5G06510.3,AT5G06510.6,AT5G12840.1,AT5G12840.2,AT5G12840.4,AT5G12840.5	12	0	0	1	0	0	SS	miR169	conserved family	2	n	14	y	0.00229393	n	14	y	0.00229393	n	1	AT1G54160	6	Cold,Drought,Lipopolysaccharide,Nitrogen-deficiency,Pectobacterium carotovorum,Phosphate-deficiency	7	Cold,Drought,Gamma-irradiated,Lipopolysaccharide,Nitrogen-deficiency,Pectobacterium carotovorum,Phosphate-deficiency	6	0.836416	0.843308
ath-miR169e	ath-miR169i	conserved	Flowering plants	conserved	Seed plants	12	AT1G54160.1,AT3G05690.1,AT3G05690.2,AT3G14020.1,AT3G14020.2,AT5G06510.2,AT5G06510.3,AT5G06510.6,AT5G12840.1,AT5G12840.2,AT5G12840.4,AT5G12840.5	12	0	0	1	0	0	SS	miR169	conserved family	2	n	14	y	0.00229393	n	14	y	0.00229393	n	1	AT1G54160	6	Cold,Drought,Lipopolysaccharide,Nitrogen-deficiency,Pectobacterium carotovorum,Phosphate-deficiency	6	Cold,Drought,Lipopolysaccharide,Nitrogen-deficiency,Pectobacterium carotovorum,Phosphate-deficiency	6	0.836416	0.299021
ath-miR169e	ath-miR169j	conserved	Flowering plants	conserved	Seed plants	8	AT1G54160.1,AT3G05690.1,AT3G05690.2,AT3G14020.1,AT3G14020.2,AT5G06510.2,AT5G06510.3,AT5G06510.6	8	0	0	1	0	0	SS	miR169	conserved family	2	n	14	y	0.00229393	n	14	y	0.00229393	n	1	AT1G54160	6	Cold,Drought,Lipopolysaccharide,Nitrogen-deficiency,Pectobacterium carotovorum,Phosphate-deficiency	6	Cold,Drought,Lipopolysaccharide,Nitrogen-deficiency,Pectobacterium carotovorum,Phosphate-deficiency	6	0.836416	0.299021
ath-miR169e	ath-miR169k	conserved	Flowering plants	conserved	Seed plants	12	AT1G54160.1,AT3G05690.1,AT3G05690.2,AT3G14020.1,AT3G14020.2,AT5G06510.2,AT5G06510.3,AT5G06510.6,AT5G12840.1,AT5G12840.2,AT5G12840.4,AT5G12840.5	12	0	0	1	0	0	SS	miR169	conserved family	2	n	14	y	0.00229393	n	14	y	0.00229393	n	1	AT1G54160	6	Cold,Drought,Lipopolysaccharide,Nitrogen-deficiency,Pectobacterium carotovorum,Phosphate-deficiency	6	Cold,Drought,Lipopolysaccharide,Nitrogen-deficiency,Pectobacterium carotovorum,Phosphate-deficiency	6	0.836416	0.843308
ath-miR169e	ath-miR169l	conserved	Flowering plants	conserved	Seed plants	12	AT1G54160.1,AT3G05690.1,AT3G05690.2,AT3G14020.1,AT3G14020.2,AT5G06510.2,AT5G06510.3,AT5G06510.6,AT5G12840.1,AT5G12840.2,AT5G12840.4,AT5G12840.5	12	0	0	1	0	0	SS	miR169	conserved family	2	n	14	y	0.00229393	n	14	y	0.00229393	n	1	AT1G54160	6	Cold,Drought,Lipopolysaccharide,Nitrogen-deficiency,Pectobacterium carotovorum,Phosphate-deficiency	6	Cold,Drought,Lipopolysaccharide,Nitrogen-deficiency,Pectobacterium carotovorum,Phosphate-deficiency	6	0.836416	0.299021
ath-miR169e	ath-miR169m	conserved	Flowering plants	conserved	Seed plants	12	AT1G54160.1,AT3G05690.1,AT3G05690.2,AT3G14020.1,AT3G14020.2,AT5G06510.2,AT5G06510.3,AT5G06510.6,AT5G12840.1,AT5G12840.2,AT5G12840.4,AT5G12840.5	12	0	0	1	0	0	SS	miR169	conserved family	2	n	14	y	0.00229393	n	14	y	0.00229393	n	1	AT1G54160	6	Cold,Drought,Lipopolysaccharide,Nitrogen-deficiency,Pectobacterium carotovorum,Phosphate-deficiency	6	Cold,Drought,Lipopolysaccharide,Nitrogen-deficiency,Pectobacterium carotovorum,Phosphate-deficiency	6	0.836416	0.843308
ath-miR169e	ath-miR169n	conserved	Flowering plants	conserved	Seed plants	12	AT1G54160.1,AT3G05690.1,AT3G05690.2,AT3G14020.1,AT3G14020.2,AT5G06510.2,AT5G06510.3,AT5G06510.6,AT5G12840.1,AT5G12840.2,AT5G12840.4,AT5G12840.5	8	0	4	0.666667	0	0.333333	SS	miR169	conserved family	2	n	14	y	0.00229393	n	14	y	0.00229393	n	1	AT1G54160	6	Cold,Drought,Lipopolysaccharide,Nitrogen-deficiency,Pectobacterium carotovorum,Phosphate-deficiency	6	Cold,Drought,Lipopolysaccharide,Nitrogen-deficiency,Pectobacterium carotovorum,Phosphate-deficiency	6	0.836416	0.299021
ath-miR169e	ath-miR5658	conserved	Flowering plants	non-conserved	Arabidopsis thaliana	1	AT1G54160.1	0	0	1	0	0	1	SD	interfamily		277.667	y	14	y	0.00229393	n	46	y	0.431559	y	1	AT1G54160	6	Cold,Drought,Lipopolysaccharide,Nitrogen-deficiency,Pectobacterium carotovorum,Phosphate-deficiency	0		0	0.537862	0.0448047
ath-miR169f-5p	ath-miR169g-5p	conserved	Flowering plants	conserved	Flowering plants	14	AT1G54160.1,AT1G68560.1,AT3G05690.1,AT3G05690.2,AT3G14020.1,AT3G14020.2,AT3G20910.1,AT5G06510.2,AT5G06510.3,AT5G06510.6,AT5G12840.1,AT5G12840.2,AT5G12840.4,AT5G12840.5	0	1	13	0	0.0714286	0.928571	SD	miR169	conserved family	21.8333	n	14	y	0.00229393	n	13	y	0	n	2	AT1G54160,AT1G68560	6	Cold,Drought,Lipopolysaccharide,Nitrogen-deficiency,Pectobacterium carotovorum,Phosphate-deficiency	6	Cold,Drought,Lipopolysaccharide,Nitrogen-deficiency,Pectobacterium carotovorum,Phosphate-deficiency	6	1	0.889924
ath-miR169f-5p	ath-miR169h	conserved	Flowering plants	conserved	Seed plants	12	AT1G54160.1,AT3G05690.1,AT3G05690.2,AT3G14020.1,AT3G14020.2,AT5G06510.2,AT5G06510.3,AT5G06510.6,AT5G12840.1,AT5G12840.2,AT5G12840.4,AT5G12840.5	12	0	0	1	0	0	SS	miR169	conserved family	2	n	14	y	0.00229393	n	14	y	0.00229393	n	1	AT1G54160	6	Cold,Drought,Lipopolysaccharide,Nitrogen-deficiency,Pectobacterium carotovorum,Phosphate-deficiency	7	Cold,Drought,Gamma-irradiated,Lipopolysaccharide,Nitrogen-deficiency,Pectobacterium carotovorum,Phosphate-deficiency	6	0.836416	0.873313
ath-miR169f-5p	ath-miR169i	conserved	Flowering plants	conserved	Seed plants	12	AT1G54160.1,AT3G05690.1,AT3G05690.2,AT3G14020.1,AT3G14020.2,AT5G06510.2,AT5G06510.3,AT5G06510.6,AT5G12840.1,AT5G12840.2,AT5G12840.4,AT5G12840.5	12	0	0	1	0	0	SS	miR169	conserved family	2	n	14	y	0.00229393	n	14	y	0.00229393	n	1	AT1G54160	6	Cold,Drought,Lipopolysaccharide,Nitrogen-deficiency,Pectobacterium carotovorum,Phosphate-deficiency	6	Cold,Drought,Lipopolysaccharide,Nitrogen-deficiency,Pectobacterium carotovorum,Phosphate-deficiency	6	0.836416	0.458173
ath-miR169f-5p	ath-miR169j	conserved	Flowering plants	conserved	Seed plants	8	AT1G54160.1,AT3G05690.1,AT3G05690.2,AT3G14020.1,AT3G14020.2,AT5G06510.2,AT5G06510.3,AT5G06510.6	8	0	0	1	0	0	SS	miR169	conserved family	2	n	14	y	0.00229393	n	14	y	0.00229393	n	1	AT1G54160	6	Cold,Drought,Lipopolysaccharide,Nitrogen-deficiency,Pectobacterium carotovorum,Phosphate-deficiency	6	Cold,Drought,Lipopolysaccharide,Nitrogen-deficiency,Pectobacterium carotovorum,Phosphate-deficiency	6	0.836416	0.458173
ath-miR169f-5p	ath-miR169k	conserved	Flowering plants	conserved	Seed plants	12	AT1G54160.1,AT3G05690.1,AT3G05690.2,AT3G14020.1,AT3G14020.2,AT5G06510.2,AT5G06510.3,AT5G06510.6,AT5G12840.1,AT5G12840.2,AT5G12840.4,AT5G12840.5	12	0	0	1	0	0	SS	miR169	conserved family	2	n	14	y	0.00229393	n	14	y	0.00229393	n	1	AT1G54160	6	Cold,Drought,Lipopolysaccharide,Nitrogen-deficiency,Pectobacterium carotovorum,Phosphate-deficiency	6	Cold,Drought,Lipopolysaccharide,Nitrogen-deficiency,Pectobacterium carotovorum,Phosphate-deficiency	6	0.836416	0.873313
ath-miR169f-5p	ath-miR169l	conserved	Flowering plants	conserved	Seed plants	12	AT1G54160.1,AT3G05690.1,AT3G05690.2,AT3G14020.1,AT3G14020.2,AT5G06510.2,AT5G06510.3,AT5G06510.6,AT5G12840.1,AT5G12840.2,AT5G12840.4,AT5G12840.5	12	0	0	1	0	0	SS	miR169	conserved family	2	n	14	y	0.00229393	n	14	y	0.00229393	n	1	AT1G54160	6	Cold,Drought,Lipopolysaccharide,Nitrogen-deficiency,Pectobacterium carotovorum,Phosphate-deficiency	6	Cold,Drought,Lipopolysaccharide,Nitrogen-deficiency,Pectobacterium carotovorum,Phosphate-deficiency	6	0.836416	0.458173
ath-miR169f-5p	ath-miR169m	conserved	Flowering plants	conserved	Seed plants	12	AT1G54160.1,AT3G05690.1,AT3G05690.2,AT3G14020.1,AT3G14020.2,AT5G06510.2,AT5G06510.3,AT5G06510.6,AT5G12840.1,AT5G12840.2,AT5G12840.4,AT5G12840.5	12	0	0	1	0	0	SS	miR169	conserved family	2	n	14	y	0.00229393	n	14	y	0.00229393	n	1	AT1G54160	6	Cold,Drought,Lipopolysaccharide,Nitrogen-deficiency,Pectobacterium carotovorum,Phosphate-deficiency	6	Cold,Drought,Lipopolysaccharide,Nitrogen-deficiency,Pectobacterium carotovorum,Phosphate-deficiency	6	0.836416	0.873313
ath-miR169f-5p	ath-miR169n	conserved	Flowering plants	conserved	Seed plants	12	AT1G54160.1,AT3G05690.1,AT3G05690.2,AT3G14020.1,AT3G14020.2,AT5G06510.2,AT5G06510.3,AT5G06510.6,AT5G12840.1,AT5G12840.2,AT5G12840.4,AT5G12840.5	8	0	4	0.666667	0	0.333333	SS	miR169	conserved family	2	n	14	y	0.00229393	n	14	y	0.00229393	n	1	AT1G54160	6	Cold,Drought,Lipopolysaccharide,Nitrogen-deficiency,Pectobacterium carotovorum,Phosphate-deficiency	6	Cold,Drought,Lipopolysaccharide,Nitrogen-deficiency,Pectobacterium carotovorum,Phosphate-deficiency	6	0.836416	0.458173
ath-miR169f-5p	ath-miR5658	conserved	Flowering plants	non-conserved	Arabidopsis thaliana	1	AT1G54160.1	0	0	1	0	0	1	SD	interfamily		277.667	y	14	y	0.00229393	n	46	y	0.431559	y	1	AT1G54160	6	Cold,Drought,Lipopolysaccharide,Nitrogen-deficiency,Pectobacterium carotovorum,Phosphate-deficiency	0		0	0.537862	0.12765
ath-miR169g-5p	ath-miR169h	conserved	Flowering plants	conserved	Seed plants	12	AT1G54160.1,AT3G05690.1,AT3G05690.2,AT3G14020.1,AT3G14020.2,AT5G06510.2,AT5G06510.3,AT5G06510.6,AT5G12840.1,AT5G12840.2,AT5G12840.4,AT5G12840.5	0	0	12	0	0	1	SD	miR169	conserved family	21.8333	n	13	y	0	n	14	y	0.00229393	n	1	AT1G54160	6	Cold,Drought,Lipopolysaccharide,Nitrogen-deficiency,Pectobacterium carotovorum,Phosphate-deficiency	7	Cold,Drought,Gamma-irradiated,Lipopolysaccharide,Nitrogen-deficiency,Pectobacterium carotovorum,Phosphate-deficiency	6	0.836416	0.843308
ath-miR169g-5p	ath-miR169i	conserved	Flowering plants	conserved	Seed plants	12	AT1G54160.1,AT3G05690.1,AT3G05690.2,AT3G14020.1,AT3G14020.2,AT5G06510.2,AT5G06510.3,AT5G06510.6,AT5G12840.1,AT5G12840.2,AT5G12840.4,AT5G12840.5	0	0	12	0	0	1	SD	miR169	conserved family	21.8333	n	13	y	0	n	14	y	0.00229393	n	1	AT1G54160	6	Cold,Drought,Lipopolysaccharide,Nitrogen-deficiency,Pectobacterium carotovorum,Phosphate-deficiency	6	Cold,Drought,Lipopolysaccharide,Nitrogen-deficiency,Pectobacterium carotovorum,Phosphate-deficiency	6	0.836416	0.299021
ath-miR169g-5p	ath-miR169j	conserved	Flowering plants	conserved	Seed plants	8	AT1G54160.1,AT3G05690.1,AT3G05690.2,AT3G14020.1,AT3G14020.2,AT5G06510.2,AT5G06510.3,AT5G06510.6	0	0	8	0	0	1	SD	miR169	conserved family	21.8333	n	13	y	0	n	14	y	0.00229393	n	1	AT1G54160	6	Cold,Drought,Lipopolysaccharide,Nitrogen-deficiency,Pectobacterium carotovorum,Phosphate-deficiency	6	Cold,Drought,Lipopolysaccharide,Nitrogen-deficiency,Pectobacterium carotovorum,Phosphate-deficiency	6	0.836416	0.299021
ath-miR169g-5p	ath-miR169k	conserved	Flowering plants	conserved	Seed plants	12	AT1G54160.1,AT3G05690.1,AT3G05690.2,AT3G14020.1,AT3G14020.2,AT5G06510.2,AT5G06510.3,AT5G06510.6,AT5G12840.1,AT5G12840.2,AT5G12840.4,AT5G12840.5	0	0	12	0	0	1	SD	miR169	conserved family	21.8333	n	13	y	0	n	14	y	0.00229393	n	1	AT1G54160	6	Cold,Drought,Lipopolysaccharide,Nitrogen-deficiency,Pectobacterium carotovorum,Phosphate-deficiency	6	Cold,Drought,Lipopolysaccharide,Nitrogen-deficiency,Pectobacterium carotovorum,Phosphate-deficiency	6	0.836416	0.843308
ath-miR169g-5p	ath-miR169l	conserved	Flowering plants	conserved	Seed plants	12	AT1G54160.1,AT3G05690.1,AT3G05690.2,AT3G14020.1,AT3G14020.2,AT5G06510.2,AT5G06510.3,AT5G06510.6,AT5G12840.1,AT5G12840.2,AT5G12840.4,AT5G12840.5	0	0	12	0	0	1	SD	miR169	conserved family	21.8333	n	13	y	0	n	14	y	0.00229393	n	1	AT1G54160	6	Cold,Drought,Lipopolysaccharide,Nitrogen-deficiency,Pectobacterium carotovorum,Phosphate-deficiency	6	Cold,Drought,Lipopolysaccharide,Nitrogen-deficiency,Pectobacterium carotovorum,Phosphate-deficiency	6	0.836416	0.299021
ath-miR169g-5p	ath-miR169m	conserved	Flowering plants	conserved	Seed plants	12	AT1G54160.1,AT3G05690.1,AT3G05690.2,AT3G14020.1,AT3G14020.2,AT5G06510.2,AT5G06510.3,AT5G06510.6,AT5G12840.1,AT5G12840.2,AT5G12840.4,AT5G12840.5	0	0	12	0	0	1	SD	miR169	conserved family	21.8333	n	13	y	0	n	14	y	0.00229393	n	1	AT1G54160	6	Cold,Drought,Lipopolysaccharide,Nitrogen-deficiency,Pectobacterium carotovorum,Phosphate-deficiency	6	Cold,Drought,Lipopolysaccharide,Nitrogen-deficiency,Pectobacterium carotovorum,Phosphate-deficiency	6	0.836416	0.843308
ath-miR169g-5p	ath-miR169n	conserved	Flowering plants	conserved	Seed plants	8	AT1G54160.1,AT3G05690.1,AT3G05690.2,AT3G14020.1,AT3G14020.2,AT5G06510.2,AT5G06510.3,AT5G06510.6	0	0	8	0	0	1	SD	miR169	conserved family	21.8333	n	13	y	0	n	14	y	0.00229393	n	1	AT1G54160	6	Cold,Drought,Lipopolysaccharide,Nitrogen-deficiency,Pectobacterium carotovorum,Phosphate-deficiency	6	Cold,Drought,Lipopolysaccharide,Nitrogen-deficiency,Pectobacterium carotovorum,Phosphate-deficiency	6	0.836416	0.299021
ath-miR169h	ath-miR169i	conserved	Seed plants	conserved	Seed plants	19	AT1G17590.1,AT1G17590.2,AT1G17590.3,AT1G17590.4,AT1G54160.1,AT1G72830.1,AT1G72830.2,AT1G72830.3,AT3G05690.1,AT3G05690.2,AT3G14020.1,AT3G14020.2,AT5G06510.2,AT5G06510.3,AT5G06510.6,AT5G12840.1,AT5G12840.2,AT5G12840.4,AT5G12840.5	19	0	0	1	0	0	SS	miR169	conserved family	2	n	14	y	0.00229393	n	14	y	0.00229393	n	1	AT1G54160	7	Cold,Drought,Gamma-irradiated,Lipopolysaccharide,Nitrogen-deficiency,Pectobacterium carotovorum,Phosphate-deficiency	6	Cold,Drought,Lipopolysaccharide,Nitrogen-deficiency,Pectobacterium carotovorum,Phosphate-deficiency	6	1	0.7538
ath-miR169h	ath-miR169j	conserved	Seed plants	conserved	Seed plants	15	AT1G17590.1,AT1G17590.2,AT1G17590.3,AT1G17590.4,AT1G54160.1,AT1G72830.1,AT1G72830.2,AT1G72830.3,AT3G05690.1,AT3G05690.2,AT3G14020.1,AT3G14020.2,AT5G06510.2,AT5G06510.3,AT5G06510.6	15	0	0	1	0	0	SS	miR169	conserved family	2	n	14	y	0.00229393	n	14	y	0.00229393	n	1	AT1G54160	7	Cold,Drought,Gamma-irradiated,Lipopolysaccharide,Nitrogen-deficiency,Pectobacterium carotovorum,Phosphate-deficiency	6	Cold,Drought,Lipopolysaccharide,Nitrogen-deficiency,Pectobacterium carotovorum,Phosphate-deficiency	6	1	0.7538
ath-miR169h	ath-miR169k	conserved	Seed plants	conserved	Seed plants	19	AT1G17590.1,AT1G17590.2,AT1G17590.3,AT1G17590.4,AT1G54160.1,AT1G72830.1,AT1G72830.2,AT1G72830.3,AT3G05690.1,AT3G05690.2,AT3G14020.1,AT3G14020.2,AT5G06510.2,AT5G06510.3,AT5G06510.6,AT5G12840.1,AT5G12840.2,AT5G12840.4,AT5G12840.5	19	0	0	1	0	0	SS	miR169	conserved family	2	n	14	y	0.00229393	n	14	y	0.00229393	n	1	AT1G54160	7	Cold,Drought,Gamma-irradiated,Lipopolysaccharide,Nitrogen-deficiency,Pectobacterium carotovorum,Phosphate-deficiency	6	Cold,Drought,Lipopolysaccharide,Nitrogen-deficiency,Pectobacterium carotovorum,Phosphate-deficiency	6	1	1
ath-miR169h	ath-miR169l	conserved	Seed plants	conserved	Seed plants	19	AT1G17590.1,AT1G17590.2,AT1G17590.3,AT1G17590.4,AT1G54160.1,AT1G72830.1,AT1G72830.2,AT1G72830.3,AT3G05690.1,AT3G05690.2,AT3G14020.1,AT3G14020.2,AT5G06510.2,AT5G06510.3,AT5G06510.6,AT5G12840.1,AT5G12840.2,AT5G12840.4,AT5G12840.5	19	0	0	1	0	0	SS	miR169	conserved family	2	n	14	y	0.00229393	n	14	y	0.00229393	n	1	AT1G54160	7	Cold,Drought,Gamma-irradiated,Lipopolysaccharide,Nitrogen-deficiency,Pectobacterium carotovorum,Phosphate-deficiency	6	Cold,Drought,Lipopolysaccharide,Nitrogen-deficiency,Pectobacterium carotovorum,Phosphate-deficiency	6	1	0.7538
ath-miR169h	ath-miR169m	conserved	Seed plants	conserved	Seed plants	19	AT1G17590.1,AT1G17590.2,AT1G17590.3,AT1G17590.4,AT1G54160.1,AT1G72830.1,AT1G72830.2,AT1G72830.3,AT3G05690.1,AT3G05690.2,AT3G14020.1,AT3G14020.2,AT5G06510.2,AT5G06510.3,AT5G06510.6,AT5G12840.1,AT5G12840.2,AT5G12840.4,AT5G12840.5	19	0	0	1	0	0	SS	miR169	conserved family	2	n	14	y	0.00229393	n	14	y	0.00229393	n	1	AT1G54160	7	Cold,Drought,Gamma-irradiated,Lipopolysaccharide,Nitrogen-deficiency,Pectobacterium carotovorum,Phosphate-deficiency	6	Cold,Drought,Lipopolysaccharide,Nitrogen-deficiency,Pectobacterium carotovorum,Phosphate-deficiency	6	1	1
ath-miR169h	ath-miR169n	conserved	Seed plants	conserved	Seed plants	19	AT1G17590.1,AT1G17590.2,AT1G17590.3,AT1G17590.4,AT1G54160.1,AT1G72830.1,AT1G72830.2,AT1G72830.3,AT3G05690.1,AT3G05690.2,AT3G14020.1,AT3G14020.2,AT5G06510.2,AT5G06510.3,AT5G06510.6,AT5G12840.1,AT5G12840.2,AT5G12840.4,AT5G12840.5	15	0	4	0.789474	0	0.210526	SS	miR169	conserved family	2	n	14	y	0.00229393	n	14	y	0.00229393	n	1	AT1G54160	7	Cold,Drought,Gamma-irradiated,Lipopolysaccharide,Nitrogen-deficiency,Pectobacterium carotovorum,Phosphate-deficiency	6	Cold,Drought,Lipopolysaccharide,Nitrogen-deficiency,Pectobacterium carotovorum,Phosphate-deficiency	6	1	0.7538
ath-miR169h	ath-miR5658	conserved	Seed plants	non-conserved	Arabidopsis thaliana	1	AT1G54160.1	0	0	1	0	0	1	SD	interfamily		277.667	y	14	y	0.00229393	n	46	y	0.431559	y	1	AT1G54160	7	Cold,Drought,Gamma-irradiated,Lipopolysaccharide,Nitrogen-deficiency,Pectobacterium carotovorum,Phosphate-deficiency	0		0	0.50519	0.0517408
ath-miR169i	ath-miR169j	conserved	Seed plants	conserved	Seed plants	15	AT1G17590.1,AT1G17590.2,AT1G17590.3,AT1G17590.4,AT1G54160.1,AT1G72830.1,AT1G72830.2,AT1G72830.3,AT3G05690.1,AT3G05690.2,AT3G14020.1,AT3G14020.2,AT5G06510.2,AT5G06510.3,AT5G06510.6	15	0	0	1	0	0	SS	miR169	conserved family	2	n	14	y	0.00229393	n	14	y	0.00229393	n	1	AT1G54160	6	Cold,Drought,Lipopolysaccharide,Nitrogen-deficiency,Pectobacterium carotovorum,Phosphate-deficiency	6	Cold,Drought,Lipopolysaccharide,Nitrogen-deficiency,Pectobacterium carotovorum,Phosphate-deficiency	6	1	1
ath-miR169i	ath-miR169k	conserved	Seed plants	conserved	Seed plants	19	AT1G17590.1,AT1G17590.2,AT1G17590.3,AT1G17590.4,AT1G54160.1,AT1G72830.1,AT1G72830.2,AT1G72830.3,AT3G05690.1,AT3G05690.2,AT3G14020.1,AT3G14020.2,AT5G06510.2,AT5G06510.3,AT5G06510.6,AT5G12840.1,AT5G12840.2,AT5G12840.4,AT5G12840.5	19	0	0	1	0	0	SS	miR169	conserved family	2	n	14	y	0.00229393	n	14	y	0.00229393	n	1	AT1G54160	6	Cold,Drought,Lipopolysaccharide,Nitrogen-deficiency,Pectobacterium carotovorum,Phosphate-deficiency	6	Cold,Drought,Lipopolysaccharide,Nitrogen-deficiency,Pectobacterium carotovorum,Phosphate-deficiency	6	1	0.7538
ath-miR169i	ath-miR169l	conserved	Seed plants	conserved	Seed plants	19	AT1G17590.1,AT1G17590.2,AT1G17590.3,AT1G17590.4,AT1G54160.1,AT1G72830.1,AT1G72830.2,AT1G72830.3,AT3G05690.1,AT3G05690.2,AT3G14020.1,AT3G14020.2,AT5G06510.2,AT5G06510.3,AT5G06510.6,AT5G12840.1,AT5G12840.2,AT5G12840.4,AT5G12840.5	19	0	0	1	0	0	SS	miR169	conserved family	2	n	14	y	0.00229393	n	14	y	0.00229393	n	1	AT1G54160	6	Cold,Drought,Lipopolysaccharide,Nitrogen-deficiency,Pectobacterium carotovorum,Phosphate-deficiency	6	Cold,Drought,Lipopolysaccharide,Nitrogen-deficiency,Pectobacterium carotovorum,Phosphate-deficiency	6	1	1
ath-miR169i	ath-miR169m	conserved	Seed plants	conserved	Seed plants	19	AT1G17590.1,AT1G17590.2,AT1G17590.3,AT1G17590.4,AT1G54160.1,AT1G72830.1,AT1G72830.2,AT1G72830.3,AT3G05690.1,AT3G05690.2,AT3G14020.1,AT3G14020.2,AT5G06510.2,AT5G06510.3,AT5G06510.6,AT5G12840.1,AT5G12840.2,AT5G12840.4,AT5G12840.5	19	0	0	1	0	0	SS	miR169	conserved family	2	n	14	y	0.00229393	n	14	y	0.00229393	n	1	AT1G54160	6	Cold,Drought,Lipopolysaccharide,Nitrogen-deficiency,Pectobacterium carotovorum,Phosphate-deficiency	6	Cold,Drought,Lipopolysaccharide,Nitrogen-deficiency,Pectobacterium carotovorum,Phosphate-deficiency	6	1	0.7538
ath-miR169i	ath-miR169n	conserved	Seed plants	conserved	Seed plants	19	AT1G17590.1,AT1G17590.2,AT1G17590.3,AT1G17590.4,AT1G54160.1,AT1G72830.1,AT1G72830.2,AT1G72830.3,AT3G05690.1,AT3G05690.2,AT3G14020.1,AT3G14020.2,AT5G06510.2,AT5G06510.3,AT5G06510.6,AT5G12840.1,AT5G12840.2,AT5G12840.4,AT5G12840.5	15	0	4	0.789474	0	0.210526	SS	miR169	conserved family	2	n	14	y	0.00229393	n	14	y	0.00229393	n	1	AT1G54160	6	Cold,Drought,Lipopolysaccharide,Nitrogen-deficiency,Pectobacterium carotovorum,Phosphate-deficiency	6	Cold,Drought,Lipopolysaccharide,Nitrogen-deficiency,Pectobacterium carotovorum,Phosphate-deficiency	6	1	1
ath-miR169i	ath-miR5658	conserved	Seed plants	non-conserved	Arabidopsis thaliana	1	AT1G54160.1	0	0	1	0	0	1	SD	interfamily		277.667	y	14	y	0.00229393	n	46	y	0.431559	y	1	AT1G54160	6	Cold,Drought,Lipopolysaccharide,Nitrogen-deficiency,Pectobacterium carotovorum,Phosphate-deficiency	0		0	0.50519	0.183956
ath-miR169j	ath-miR169k	conserved	Seed plants	conserved	Seed plants	15	AT1G17590.1,AT1G17590.2,AT1G17590.3,AT1G17590.4,AT1G54160.1,AT1G72830.1,AT1G72830.2,AT1G72830.3,AT3G05690.1,AT3G05690.2,AT3G14020.1,AT3G14020.2,AT5G06510.2,AT5G06510.3,AT5G06510.6	15	0	0	1	0	0	SS	miR169	conserved family	2	n	14	y	0.00229393	n	14	y	0.00229393	n	1	AT1G54160	6	Cold,Drought,Lipopolysaccharide,Nitrogen-deficiency,Pectobacterium carotovorum,Phosphate-deficiency	6	Cold,Drought,Lipopolysaccharide,Nitrogen-deficiency,Pectobacterium carotovorum,Phosphate-deficiency	6	1	0.7538
ath-miR169j	ath-miR169l	conserved	Seed plants	conserved	Seed plants	15	AT1G17590.1,AT1G17590.2,AT1G17590.3,AT1G17590.4,AT1G54160.1,AT1G72830.1,AT1G72830.2,AT1G72830.3,AT3G05690.1,AT3G05690.2,AT3G14020.1,AT3G14020.2,AT5G06510.2,AT5G06510.3,AT5G06510.6	15	0	0	1	0	0	SS	miR169	conserved family	2	n	14	y	0.00229393	n	14	y	0.00229393	n	1	AT1G54160	6	Cold,Drought,Lipopolysaccharide,Nitrogen-deficiency,Pectobacterium carotovorum,Phosphate-deficiency	6	Cold,Drought,Lipopolysaccharide,Nitrogen-deficiency,Pectobacterium carotovorum,Phosphate-deficiency	6	1	1
ath-miR169j	ath-miR169m	conserved	Seed plants	conserved	Seed plants	15	AT1G17590.1,AT1G17590.2,AT1G17590.3,AT1G17590.4,AT1G54160.1,AT1G72830.1,AT1G72830.2,AT1G72830.3,AT3G05690.1,AT3G05690.2,AT3G14020.1,AT3G14020.2,AT5G06510.2,AT5G06510.3,AT5G06510.6	15	0	0	1	0	0	SS	miR169	conserved family	2	n	14	y	0.00229393	n	14	y	0.00229393	n	1	AT1G54160	6	Cold,Drought,Lipopolysaccharide,Nitrogen-deficiency,Pectobacterium carotovorum,Phosphate-deficiency	6	Cold,Drought,Lipopolysaccharide,Nitrogen-deficiency,Pectobacterium carotovorum,Phosphate-deficiency	6	1	0.7538
ath-miR169j	ath-miR169n	conserved	Seed plants	conserved	Seed plants	15	AT1G17590.1,AT1G17590.2,AT1G17590.3,AT1G17590.4,AT1G54160.1,AT1G72830.1,AT1G72830.2,AT1G72830.3,AT3G05690.1,AT3G05690.2,AT3G14020.1,AT3G14020.2,AT5G06510.2,AT5G06510.3,AT5G06510.6	15	0	0	1	0	0	SS	miR169	conserved family	2	n	14	y	0.00229393	n	14	y	0.00229393	n	1	AT1G54160	6	Cold,Drought,Lipopolysaccharide,Nitrogen-deficiency,Pectobacterium carotovorum,Phosphate-deficiency	6	Cold,Drought,Lipopolysaccharide,Nitrogen-deficiency,Pectobacterium carotovorum,Phosphate-deficiency	6	1	1
ath-miR169j	ath-miR5658	conserved	Seed plants	non-conserved	Arabidopsis thaliana	1	AT1G54160.1	0	0	1	0	0	1	SD	interfamily		277.667	y	14	y	0.00229393	n	46	y	0.431559	y	1	AT1G54160	6	Cold,Drought,Lipopolysaccharide,Nitrogen-deficiency,Pectobacterium carotovorum,Phosphate-deficiency	0		0	0.50519	0.183956
ath-miR169k	ath-miR169l	conserved	Seed plants	conserved	Seed plants	19	AT1G17590.1,AT1G17590.2,AT1G17590.3,AT1G17590.4,AT1G54160.1,AT1G72830.1,AT1G72830.2,AT1G72830.3,AT3G05690.1,AT3G05690.2,AT3G14020.1,AT3G14020.2,AT5G06510.2,AT5G06510.3,AT5G06510.6,AT5G12840.1,AT5G12840.2,AT5G12840.4,AT5G12840.5	19	0	0	1	0	0	SS	miR169	conserved family	2	n	14	y	0.00229393	n	14	y	0.00229393	n	1	AT1G54160	6	Cold,Drought,Lipopolysaccharide,Nitrogen-deficiency,Pectobacterium carotovorum,Phosphate-deficiency	6	Cold,Drought,Lipopolysaccharide,Nitrogen-deficiency,Pectobacterium carotovorum,Phosphate-deficiency	6	1	0.7538
ath-miR169k	ath-miR169m	conserved	Seed plants	conserved	Seed plants	19	AT1G17590.1,AT1G17590.2,AT1G17590.3,AT1G17590.4,AT1G54160.1,AT1G72830.1,AT1G72830.2,AT1G72830.3,AT3G05690.1,AT3G05690.2,AT3G14020.1,AT3G14020.2,AT5G06510.2,AT5G06510.3,AT5G06510.6,AT5G12840.1,AT5G12840.2,AT5G12840.4,AT5G12840.5	19	0	0	1	0	0	SS	miR169	conserved family	2	n	14	y	0.00229393	n	14	y	0.00229393	n	1	AT1G54160	6	Cold,Drought,Lipopolysaccharide,Nitrogen-deficiency,Pectobacterium carotovorum,Phosphate-deficiency	6	Cold,Drought,Lipopolysaccharide,Nitrogen-deficiency,Pectobacterium carotovorum,Phosphate-deficiency	6	1	1
ath-miR169k	ath-miR169n	conserved	Seed plants	conserved	Seed plants	19	AT1G17590.1,AT1G17590.2,AT1G17590.3,AT1G17590.4,AT1G54160.1,AT1G72830.1,AT1G72830.2,AT1G72830.3,AT3G05690.1,AT3G05690.2,AT3G14020.1,AT3G14020.2,AT5G06510.2,AT5G06510.3,AT5G06510.6,AT5G12840.1,AT5G12840.2,AT5G12840.4,AT5G12840.5	15	0	4	0.789474	0	0.210526	SS	miR169	conserved family	2	n	14	y	0.00229393	n	14	y	0.00229393	n	1	AT1G54160	6	Cold,Drought,Lipopolysaccharide,Nitrogen-deficiency,Pectobacterium carotovorum,Phosphate-deficiency	6	Cold,Drought,Lipopolysaccharide,Nitrogen-deficiency,Pectobacterium carotovorum,Phosphate-deficiency	6	1	0.7538
ath-miR169k	ath-miR5658	conserved	Seed plants	non-conserved	Arabidopsis thaliana	1	AT1G54160.1	0	0	1	0	0	1	SD	interfamily		277.667	y	14	y	0.00229393	n	46	y	0.431559	y	1	AT1G54160	6	Cold,Drought,Lipopolysaccharide,Nitrogen-deficiency,Pectobacterium carotovorum,Phosphate-deficiency	0		0	0.50519	0.0517408
ath-miR169l	ath-miR169m	conserved	Seed plants	conserved	Seed plants	19	AT1G17590.1,AT1G17590.2,AT1G17590.3,AT1G17590.4,AT1G54160.1,AT1G72830.1,AT1G72830.2,AT1G72830.3,AT3G05690.1,AT3G05690.2,AT3G14020.1,AT3G14020.2,AT5G06510.2,AT5G06510.3,AT5G06510.6,AT5G12840.1,AT5G12840.2,AT5G12840.4,AT5G12840.5	19	0	0	1	0	0	SS	miR169	conserved family	2	n	14	y	0.00229393	n	14	y	0.00229393	n	1	AT1G54160	6	Cold,Drought,Lipopolysaccharide,Nitrogen-deficiency,Pectobacterium carotovorum,Phosphate-deficiency	6	Cold,Drought,Lipopolysaccharide,Nitrogen-deficiency,Pectobacterium carotovorum,Phosphate-deficiency	6	1	0.7538
ath-miR169l	ath-miR169n	conserved	Seed plants	conserved	Seed plants	19	AT1G17590.1,AT1G17590.2,AT1G17590.3,AT1G17590.4,AT1G54160.1,AT1G72830.1,AT1G72830.2,AT1G72830.3,AT3G05690.1,AT3G05690.2,AT3G14020.1,AT3G14020.2,AT5G06510.2,AT5G06510.3,AT5G06510.6,AT5G12840.1,AT5G12840.2,AT5G12840.4,AT5G12840.5	15	0	4	0.789474	0	0.210526	SS	miR169	conserved family	2	n	14	y	0.00229393	n	14	y	0.00229393	n	1	AT1G54160	6	Cold,Drought,Lipopolysaccharide,Nitrogen-deficiency,Pectobacterium carotovorum,Phosphate-deficiency	6	Cold,Drought,Lipopolysaccharide,Nitrogen-deficiency,Pectobacterium carotovorum,Phosphate-deficiency	6	1	1
ath-miR169l	ath-miR5658	conserved	Seed plants	non-conserved	Arabidopsis thaliana	1	AT1G54160.1	0	0	1	0	0	1	SD	interfamily		277.667	y	14	y	0.00229393	n	46	y	0.431559	y	1	AT1G54160	6	Cold,Drought,Lipopolysaccharide,Nitrogen-deficiency,Pectobacterium carotovorum,Phosphate-deficiency	0		0	0.50519	0.183956
ath-miR169m	ath-miR169n	conserved	Seed plants	conserved	Seed plants	19	AT1G17590.1,AT1G17590.2,AT1G17590.3,AT1G17590.4,AT1G54160.1,AT1G72830.1,AT1G72830.2,AT1G72830.3,AT3G05690.1,AT3G05690.2,AT3G14020.1,AT3G14020.2,AT5G06510.2,AT5G06510.3,AT5G06510.6,AT5G12840.1,AT5G12840.2,AT5G12840.4,AT5G12840.5	15	0	4	0.789474	0	0.210526	SS	miR169	conserved family	2	n	14	y	0.00229393	n	14	y	0.00229393	n	1	AT1G54160	6	Cold,Drought,Lipopolysaccharide,Nitrogen-deficiency,Pectobacterium carotovorum,Phosphate-deficiency	6	Cold,Drought,Lipopolysaccharide,Nitrogen-deficiency,Pectobacterium carotovorum,Phosphate-deficiency	6	1	0.7538
ath-miR169m	ath-miR5658	conserved	Seed plants	non-conserved	Arabidopsis thaliana	1	AT1G54160.1	0	0	1	0	0	1	SD	interfamily		277.667	y	14	y	0.00229393	n	46	y	0.431559	y	1	AT1G54160	6	Cold,Drought,Lipopolysaccharide,Nitrogen-deficiency,Pectobacterium carotovorum,Phosphate-deficiency	0		0	0.50519	0.0517408
ath-miR169n	ath-miR5658	conserved	Seed plants	non-conserved	Arabidopsis thaliana	1	AT1G54160.1	0	0	1	0	0	1	SD	interfamily		277.667	y	14	y	0.00229393	n	46	y	0.431559	y	1	AT1G54160	6	Cold,Drought,Lipopolysaccharide,Nitrogen-deficiency,Pectobacterium carotovorum,Phosphate-deficiency	0		0	0.50519	0.183956
ath-miR170-3p	ath-miR171a-3p	conserved	Seed plants	conserved	Seed plants	3	AT2G45160.1,AT3G60630.1,AT4G00150.1	3	0	0	1	0	0	SS	miR170/171	conserved family	2	n	3	n	0	n	3	n	0	n	0		0		3	Cold,Drought,Salt	0	0.871718	0.0307121
ath-miR170-3p	ath-miR171b-3p	conserved	Seed plants	conserved	Land plants	3	AT2G45160.1,AT3G60630.1,AT4G00150.1	3	0	0	1	0	0	SS	miR170/171	conserved family	2	n	3	n	0	n	3	n	0	n	0		0		3	Cold,Drought,Salt	0	0.91373	-0.434104
ath-miR170-3p	ath-miR171c-3p	conserved	Seed plants	conserved	Land plants	3	AT2G45160.1,AT3G60630.1,AT4G00150.1	3	0	0	1	0	0	SS	miR170/171	conserved family	2	n	3	n	0	n	3	n	0	n	0		0		4	Cold,Drought,SO2,Salt	0	0.91373	-0.434104
ath-miR171a-3p	ath-miR171b-3p	conserved	Seed plants	conserved	Land plants	3	AT2G45160.1,AT3G60630.1,AT4G00150.1	3	0	0	1	0	0	SS	miR170/171	conserved family	2	n	3	n	0	n	3	n	0	n	0		3	Cold,Drought,Salt	3	Cold,Drought,Salt	3	0.836249	0.309724
ath-miR171a-3p	ath-miR171c-3p	conserved	Seed plants	conserved	Land plants	3	AT2G45160.1,AT3G60630.1,AT4G00150.1	3	0	0	1	0	0	SS	miR170/171	conserved family	2	n	3	n	0	n	3	n	0	n	0		3	Cold,Drought,Salt	4	Cold,Drought,SO2,Salt	3	0.836249	0.309724
ath-miR171b-3p	ath-miR171c-3p	conserved	Land plants	conserved	Land plants	7	AT2G45160.1,AT3G47170.1,AT3G60630.1,AT4G00150.1,AT5G23250.1,AT5G23250.2,AT5G23250.3	3	4	0	0.428571	0.571429	0	DD	miR170/171	conserved family	2	n	3	n	0	n	3	n	0	n	1	AT5G23250	3	Cold,Drought,Salt	4	Cold,Drought,SO2,Salt	3	1	1
ath-miR172a	ath-miR172b-3p	conserved	Flowering plants	conserved	Flowering plants	29	AT1G14440.1,AT1G14440.2,AT1G61290.2,AT2G28550.1,AT2G28550.3,AT2G28550.4,AT2G28550.5,AT2G28550.6,AT2G32770.2,AT2G39250.1,AT2G39250.2,AT2G42380.1,AT2G42380.2,AT2G42380.3,AT2G42380.4,AT2G42380.5,AT3G47360.1,AT3G54990.1,AT4G36920.1,AT4G36920.2,AT5G12900.1,AT5G60120.1,AT5G60120.2,AT5G60120.3,AT5G60120.4,AT5G60120.5,AT5G60120.6,AT5G65790.1,AT5G67180.1	22	7	0	0.758621	0.241379	0	SS	miR172	conserved family	2	n	6	n	0.00685288	n	6	n	0.00685288	n	5	AT2G42380,AT5G67180,AT5G65790,AT4G36920,AT2G28550	4	Cold,Drought,Ferrum deficiency,Hypoxic stress	5	Cold,Drought,Ferrum deficiency,Gamma-irradiated,Hypoxic stress	4	1	1
ath-miR172a	ath-miR172c	conserved	Flowering plants	conserved	Flowering plants	17	AT2G28550.1,AT2G28550.3,AT2G28550.4,AT2G28550.5,AT2G28550.6,AT2G39250.1,AT2G39250.2,AT3G54990.1,AT4G36920.1,AT4G36920.2,AT5G60120.1,AT5G60120.2,AT5G60120.3,AT5G60120.4,AT5G60120.5,AT5G60120.6,AT5G67180.1	17	0	0	1	0	0	SS	miR172	conserved family	41.5	n	6	n	0.00685288	n	5	n	0	n	3	AT5G67180,AT4G36920,AT2G28550	4	Cold,Drought,Ferrum deficiency,Hypoxic stress	3	Cold,Drought,Ferrum deficiency	3	0.858988	-0.169403
ath-miR172a	ath-miR172d-3p	conserved	Flowering plants	conserved	Flowering plants	17	AT2G28550.1,AT2G28550.3,AT2G28550.4,AT2G28550.5,AT2G28550.6,AT2G39250.1,AT2G39250.2,AT3G54990.1,AT4G36920.1,AT4G36920.2,AT5G60120.1,AT5G60120.2,AT5G60120.3,AT5G60120.4,AT5G60120.5,AT5G60120.6,AT5G67180.1	17	0	0	1	0	0	SS	miR172	conserved family	41.5	n	6	n	0.00685288	n	5	n	0	n	3	AT5G67180,AT4G36920,AT2G28550	4	Cold,Drought,Ferrum deficiency,Hypoxic stress	3	Cold,Drought,Ferrum deficiency	3	0.858988	-0.169403
ath-miR172a	ath-miR172e-3p	conserved	Flowering plants	conserved	Flowering plants	18	AT2G28550.1,AT2G28550.3,AT2G28550.4,AT2G28550.5,AT2G28550.6,AT2G39250.1,AT2G39250.2,AT3G54990.1,AT4G36920.1,AT4G36920.2,AT5G60120.1,AT5G60120.2,AT5G60120.3,AT5G60120.4,AT5G60120.5,AT5G60120.6,AT5G65790.1,AT5G67180.1	18	0	0	1	0	0	SS	miR172	conserved family	41.5	n	6	n	0.00685288	n	5	n	0	n	4	AT5G67180,AT5G65790,AT4G36920,AT2G28550	4	Cold,Drought,Ferrum deficiency,Hypoxic stress	3	Cold,Drought,Ferrum deficiency	3	0.922382	0.561301
ath-miR172a	ath-miR5021	conserved	Flowering plants	non-conserved	Arabidopsis thaliana	1	AT1G14440.1	1	0	0	1	0	0	SS	interfamily		267.214	y	6	n	0.00685288	n	54	y	0.660861	y	0		4	Cold,Drought,Ferrum deficiency,Hypoxic stress	0		0	0.557354
ath-miR172a	ath-miR5658	conserved	Flowering plants	non-conserved	Arabidopsis thaliana	3	AT1G14440.1,AT1G14440.2,AT5G67180.1	2	0	1	0.666667	0	0.333333	SS	interfamily		107.286	n	6	n	0.00685288	n	46	y	0.431559	y	1	AT5G67180	4	Cold,Drought,Ferrum deficiency,Hypoxic stress	0		0	0.591982	0.109866
ath-miR172b-3p	ath-miR172c	conserved	Flowering plants	conserved	Flowering plants	17	AT2G28550.1,AT2G28550.3,AT2G28550.4,AT2G28550.5,AT2G28550.6,AT2G39250.1,AT2G39250.2,AT3G54990.1,AT4G36920.1,AT4G36920.2,AT5G60120.1,AT5G60120.2,AT5G60120.3,AT5G60120.4,AT5G60120.5,AT5G60120.6,AT5G67180.1	17	0	0	1	0	0	SS	miR172	conserved family	41.5	n	6	n	0.00685288	n	5	n	0	n	3	AT5G67180,AT4G36920,AT2G28550	5	Cold,Drought,Ferrum deficiency,Gamma-irradiated,Hypoxic stress	3	Cold,Drought,Ferrum deficiency	3	0.858988	-0.169403
ath-miR172b-3p	ath-miR172d-3p	conserved	Flowering plants	conserved	Flowering plants	17	AT2G28550.1,AT2G28550.3,AT2G28550.4,AT2G28550.5,AT2G28550.6,AT2G39250.1,AT2G39250.2,AT3G54990.1,AT4G36920.1,AT4G36920.2,AT5G60120.1,AT5G60120.2,AT5G60120.3,AT5G60120.4,AT5G60120.5,AT5G60120.6,AT5G67180.1	17	0	0	1	0	0	SS	miR172	conserved family	41.5	n	6	n	0.00685288	n	5	n	0	n	3	AT5G67180,AT4G36920,AT2G28550	5	Cold,Drought,Ferrum deficiency,Gamma-irradiated,Hypoxic stress	3	Cold,Drought,Ferrum deficiency	3	0.858988	-0.169403
ath-miR172b-3p	ath-miR172e-3p	conserved	Flowering plants	conserved	Flowering plants	18	AT2G28550.1,AT2G28550.3,AT2G28550.4,AT2G28550.5,AT2G28550.6,AT2G39250.1,AT2G39250.2,AT3G54990.1,AT4G36920.1,AT4G36920.2,AT5G60120.1,AT5G60120.2,AT5G60120.3,AT5G60120.4,AT5G60120.5,AT5G60120.6,AT5G65790.1,AT5G67180.1	18	0	0	1	0	0	SS	miR172	conserved family	41.5	n	6	n	0.00685288	n	5	n	0	n	4	AT5G67180,AT5G65790,AT4G36920,AT2G28550	5	Cold,Drought,Ferrum deficiency,Gamma-irradiated,Hypoxic stress	3	Cold,Drought,Ferrum deficiency	3	0.922382	0.561301
ath-miR172b-3p	ath-miR5021	conserved	Flowering plants	non-conserved	Arabidopsis thaliana	1	AT1G14440.1	1	0	0	1	0	0	SS	interfamily		267.214	y	6	n	0.00685288	n	54	y	0.660861	y	0		5	Cold,Drought,Ferrum deficiency,Gamma-irradiated,Hypoxic stress	0		0	0.557354
ath-miR172b-3p	ath-miR5658	conserved	Flowering plants	non-conserved	Arabidopsis thaliana	3	AT1G14440.1,AT1G14440.2,AT5G67180.1	2	0	1	0.666667	0	0.333333	SS	interfamily		107.286	n	6	n	0.00685288	n	46	y	0.431559	y	1	AT5G67180	5	Cold,Drought,Ferrum deficiency,Gamma-irradiated,Hypoxic stress	0		0	0.591982	0.109866
ath-miR172b-5p	ath-miR172e-5p	conserved	Brassicaceae	conserved	Brassicaceae	18	AT2G03820.1,AT2G16500.1,AT2G22950.1,AT3G57330.1,AT3G57330.2,AT4G10970.1,AT4G10970.2,AT4G10970.3,AT4G10970.4,AT4G10970.5,AT4G10970.6,AT4G10970.7,AT5G48410.1,AT5G48410.2,AT5G48410.3,AT5G48410.4,AT5G48830.1,AT5G48830.2	2	16	0	0.111111	0.888889	0	DD	miR172	conserved family	2	n	1	n	0	n	1	n	0	n	4	AT5G48410,AT3G57330,AT2G16500,AT2G22950	3	Cold,Drought,Ferrum deficiency	3	Cold,Drought,Ferrum deficiency	3	1	1
ath-miR172c	ath-miR172d-3p	conserved	Flowering plants	conserved	Flowering plants	22	AT1G11960.2,AT1G65690.1,AT2G28550.1,AT2G28550.3,AT2G28550.4,AT2G28550.5,AT2G28550.6,AT2G39250.1,AT2G39250.2,AT3G48185.1,AT3G49690.1,AT3G54990.1,AT4G36920.1,AT4G36920.2,AT5G07190.2,AT5G60120.1,AT5G60120.2,AT5G60120.3,AT5G60120.4,AT5G60120.5,AT5G60120.6,AT5G67180.1	18	4	0	0.818182	0.181818	0	SS	miR172	conserved family	2	n	5	n	0	n	5	n	0	n	7	AT5G67180,AT1G65690,AT4G36920,AT3G49690,AT2G28550,AT1G11960,AT5G07190	3	Cold,Drought,Ferrum deficiency	3	Cold,Drought,Ferrum deficiency	3	1	1
ath-miR172c	ath-miR172e-3p	conserved	Flowering plants	conserved	Flowering plants	17	AT2G28550.1,AT2G28550.3,AT2G28550.4,AT2G28550.5,AT2G28550.6,AT2G39250.1,AT2G39250.2,AT3G54990.1,AT4G36920.1,AT4G36920.2,AT5G60120.1,AT5G60120.2,AT5G60120.3,AT5G60120.4,AT5G60120.5,AT5G60120.6,AT5G67180.1	17	0	0	1	0	0	SS	miR172	conserved family	2	n	5	n	0	n	5	n	0	n	3	AT5G67180,AT4G36920,AT2G28550	3	Cold,Drought,Ferrum deficiency	3	Cold,Drought,Ferrum deficiency	3	0.871708	0.0281616
ath-miR172c	ath-miR5658	conserved	Flowering plants	non-conserved	Arabidopsis thaliana	1	AT5G67180.1	0	0	1	0	0	1	SD	interfamily		177	n	5	n	0	n	46	y	0.431559	y	1	AT5G67180	3	Cold,Drought,Ferrum deficiency	0		0	0.579849	-0.112007
ath-miR172d-3p	ath-miR172e-3p	conserved	Flowering plants	conserved	Flowering plants	17	AT2G28550.1,AT2G28550.3,AT2G28550.4,AT2G28550.5,AT2G28550.6,AT2G39250.1,AT2G39250.2,AT3G54990.1,AT4G36920.1,AT4G36920.2,AT5G60120.1,AT5G60120.2,AT5G60120.3,AT5G60120.4,AT5G60120.5,AT5G60120.6,AT5G67180.1	17	0	0	1	0	0	SS	miR172	conserved family	2	n	5	n	0	n	5	n	0	n	3	AT5G67180,AT4G36920,AT2G28550	3	Cold,Drought,Ferrum deficiency	3	Cold,Drought,Ferrum deficiency	3	0.871708	0.0281616
ath-miR172d-3p	ath-miR5658	conserved	Flowering plants	non-conserved	Arabidopsis thaliana	1	AT5G67180.1	0	0	1	0	0	1	SD	interfamily		177	n	5	n	0	n	46	y	0.431559	y	1	AT5G67180	3	Cold,Drought,Ferrum deficiency	0		0	0.579849	-0.112007
ath-miR172e-3p	ath-miR5658	conserved	Flowering plants	non-conserved	Arabidopsis thaliana	1	AT5G67180.1	0	0	1	0	0	1	SD	interfamily		177	n	5	n	0	n	46	y	0.431559	y	1	AT5G67180	3	Cold,Drought,Ferrum deficiency	0		0	0.58098	-0.0380172
ath-miR173-3p	ath-miR5021	non-conserved	Arabidopsis thaliana	non-conserved	Arabidopsis thaliana	5	AT4G38960.1,AT4G38960.2,AT4G38960.3,AT4G38960.5,AT4G38960.6	0	2	3	0	0.4	0.6	SD	interfamily		264	y	1	n	0	n	54	y	0.660861	y	1	AT4G38960	0		0		0	0.344916
ath-miR1886.1	ath-miR1886.2	non-conserved	Arabidopsis thaliana	non-conserved	Arabidopsis thaliana	1	AT2G37160.4	1	0	0	1	0	0	SS	miR1886	non-conserved family	262	n	4	n	0.0449919	y	2	n	0	n	0		0		0		0	0.402574	-0.241704
ath-miR1886.1	ath-miR1886.3	non-conserved	Arabidopsis thaliana	non-conserved	Arabidopsis thaliana	1	AT2G37160.4	1	0	0	1	0	0	SS	miR1886	non-conserved family	262	n	4	n	0.0449919	y	2	n	0	n	0		0		0		0	0.467452	0.408415
ath-miR1886.1	ath-miR5021	non-conserved	Arabidopsis thaliana	non-conserved	Arabidopsis thaliana	3	AT1G61210.2,AT1G61210.3,AT4G29000.1	3	0	0	1	0	0	SS	interfamily		1032	y	4	n	0.0449919	y	54	y	0.660861	y	1	AT1G61210	0		0		0	0.453824
ath-miR1886.1	ath-miR5632-5p	non-conserved	Arabidopsis thaliana	non-conserved	Arabidopsis thaliana	1	AT2G47940.1	0	0	1	0	0	1	SD	interfamily		264	y	4	n	0.0449919	y	1	n	0	n	1	AT2G47940	0		0		0	0.394268	0.420272
ath-miR1886.2	ath-miR1886.3	non-conserved	Arabidopsis thaliana	non-conserved	Arabidopsis thaliana	1	AT2G37160.4	1	0	0	1	0	0	SS	miR1886	non-conserved family	2	n	2	n	0	n	2	n	0	n	0		0		0		0	0.459518	0.150133
ath-miR2111a-5p	ath-miR2111b-5p	conserved	Seed plants	conserved	Seed plants	13	AT1G07010.1,AT1G07010.2,AT1G07010.3,AT2G23370.1,AT2G23370.2,AT2G41450.1,AT2G41450.2,AT2G43010.1,AT2G43010.4,AT2G43010.5,AT3G27150.1,AT3G27150.2,AT5G52010.1	8	5	0	0.615385	0.384615	0	SS	miR2111	fam	2	n	2	n	0	n	2	n	0	n	3	AT1G07010,AT3G27150,AT2G43010	1	Phosphate-deficiency	1	Phosphate-deficiency	1	1	1
ath-miR2111b-3p	ath-miR5021	conserved	Rosids	non-conserved	Arabidopsis thaliana	1	AT1G11990.2	0	1	0	0	1	0	DD	interfamily		264	y	1	n	0	n	54	y	0.660861	y	0		1	Phosphate-deficiency	0		0	0.401807
ath-miR2112-3p	ath-miR842	conserved	Brassicaceae	conserved	Brassicaceae	4	AT2G37340.1,AT2G37340.2,AT2G37340.3,AT2G37340.4	4	0	0	1	0	0	SS	interfamily		264	y	1	n	0	n	2	n	0.0151515	y	1	AT2G37340	0		0		0	0.384369	-0.372738
ath-miR2934-5p	ath-miR778	non-conserved	Arabidopsis thaliana	non-conserved	Arabidopsis thaliana	2	AT2G22740.1,AT2G22740.2	2	0	0	1	0	0	SS	interfamily		4	n	2	n	1	y	1	n	0	n	0		0		1	Phosphate-deficiency	0	0.470579	0.360086
ath-miR2934-5p	ath-miR782	non-conserved	Arabidopsis thaliana	non-conserved	Arabidopsis thaliana	1	AT3G16230.1	0	0	1	0	0	1	SD	miR782/2934	non-conserved family	4	n	2	n	1	y	1	n	0	n	0		0		0		0	0.436752
ath-miR2938	ath-miR5021	non-conserved	Arabidopsis thaliana	non-conserved	Arabidopsis thaliana	1	AT5G52810.1	1	0	0	1	0	0	SS	interfamily		264	y	1	n	0	n	54	y	0.660861	y	1	AT5G52810	0		0		0	0.39451
ath-miR2939	ath-miR4243	non-conserved	Arabidopsis thaliana	conserved	Brassicaceae	1	AT3G19890.1	0	0	1	0	0	1	SD	interfamily		262	n	2	n	0	n	4	n	0.0300717	y	0		0		0		0	1	0.59317
ath-miR2939	ath-miR774a	non-conserved	Arabidopsis thaliana	non-conserved	Arabidopsis thaliana	1	AT3G19890.1	1	0	0	1	0	0	SS	interfamily		2	n	2	n	0	n	2	n	0	n	0		0		0		0	1	0.569788
ath-miR319a	ath-miR319b	conserved	Land plants	conserved	Land plants	1	AT2G26950.1	1	0	0	1	0	0	SS	miR159/319	conserved family	2	n	5	n	0	n	5	n	0	n	0		5	Aluminum excess,Cold,Drought,SO2,Salt	4	Aluminum excess,Cold,Drought,Salt	4	1	1
ath-miR319a	ath-miR319c	conserved	Land plants	conserved	Land plants	1	AT2G26950.1	1	0	0	1	0	0	SS	miR159/319	conserved family	77.4524	n	5	n	0	n	7	n	0.0104609	y	0		5	Aluminum excess,Cold,Drought,SO2,Salt	5	Abscisic acid,Aluminum excess,Cold,Drought,Salt	4	1	0.940318
ath-miR319b	ath-miR319c	conserved	Land plants	conserved	Land plants	1	AT2G26950.1	1	0	0	1	0	0	SS	miR159/319	conserved family	77.4524	n	5	n	0	n	7	n	0.0104609	y	0		4	Aluminum excess,Cold,Drought,Salt	5	Abscisic acid,Aluminum excess,Cold,Drought,Salt	4	1	0.940318
ath-miR319c	ath-miR5021	conserved	Land plants	non-conserved	Arabidopsis thaliana	4	AT2G31070.1,AT3G15030.1,AT3G15030.2,AT3G15030.3	1	0	3	0.25	0	0.75	SD	interfamily		271.605	y	7	n	0.0104609	y	54	y	0.660861	y	2	AT3G15030,AT2G31070	5	Abscisic acid,Aluminum excess,Cold,Drought,Salt	0		0	0.487306
ath-miR319c	ath-miR5658	conserved	Land plants	non-conserved	Arabidopsis thaliana	1	AT2G31070.1	0	0	1	0	0	1	SD	interfamily		163.286	n	7	n	0.0104609	y	46	y	0.431559	y	1	AT2G31070	5	Abscisic acid,Aluminum excess,Cold,Drought,Salt	0		0	0.525289	-0.0253946
ath-miR390a-5p	ath-miR390b-5p	conserved	Land plants	conserved	Land plants	2	AT2G41600.5,AT3G24660.1	1	1	0	0.5	0.5	0	NA	miR390	conserved family	2	n	1	n	0	n	1	n	0	n	1	AT3G24660	2	Aluminum excess,Ozone	1	Aluminum excess	1	1	1
ath-miR3932a	ath-miR3932b-3p	non-conserved	Arabidopsis thaliana	non-conserved	Arabidopsis thaliana	3	AT1G22370.1,AT1G54850.1,AT4G13575.2	1	2	0	0.333333	0.666667	0	DD	miR3932	non-conserved family	2	n	1	n	0	n	1	n	0	n	2	AT1G54850,AT1G22370	0		0		0	1	1
ath-miR393a-5p	ath-miR393b-5p	conserved	Seed plants	conserved	Seed plants	4	AT1G12820.1,AT3G23690.1,AT3G26810.1,AT3G62980.1	4	0	0	1	0	0	SS	miR393	conserved family	2	n	2	n	0	n	2	n	0	n	3	AT3G62980,AT3G26810,AT1G12820	10	Abscisic acid,Aluminum excess,Brassinosteroid,Cold,Drought,Lipopolysaccharide,Nitrogen-deficiency,Pectobacterium carotovorum,SO2,Salt	9	Abscisic acid,Aluminum excess,Auxin,Cold,Drought,Lipopolysaccharide,Nitrogen-deficiency,Pectobacterium carotovorum,Salt	8	1	0.885658
ath-miR393a-5p	ath-miR5658	conserved	Seed plants	non-conserved	Arabidopsis thaliana	1	AT3G26810.1	0	0	1	0	0	1	SD	interfamily		262	n	2	n	0	n	46	y	0.431559	y	1	AT3G26810	10	Abscisic acid,Aluminum excess,Brassinosteroid,Cold,Drought,Lipopolysaccharide,Nitrogen-deficiency,Pectobacterium carotovorum,SO2,Salt	0		0	0.467036	0.110931
ath-miR393b-5p	ath-miR5658	conserved	Seed plants	non-conserved	Arabidopsis thaliana	1	AT3G26810.1	0	0	1	0	0	1	SD	interfamily		262	n	2	n	0	n	46	y	0.431559	y	1	AT3G26810	9	Abscisic acid,Aluminum excess,Auxin,Cold,Drought,Lipopolysaccharide,Nitrogen-deficiency,Pectobacterium carotovorum,Salt	0		0	0.467036	0.250196
ath-miR394a	ath-miR394b-5p	conserved	Seed plants	conserved	Seed plants	5	AT1G27340.1,AT1G40104.1,AT4G20430.1,AT4G20430.2,AT4G20430.3	1	4	0	0.2	0.8	0	DD	miR394	conserved family	2	n	1	n	0	n	1	n	0	n	0		6	B.cinerea Infection,Cold,Drought,Ferrum deficiency,SO2,Salt	4	B.cinerea Infection,Cold,Ferrum deficiency,Salt	4	1	1
ath-miR395a	ath-miR395b	conserved	Seed plants	conserved	Seed plants	7	AT1G50930.2,AT2G28780.1,AT3G22890.1,AT4G14680.1,AT4G14680.2,AT5G10180.1,AT5G43780.1	7	0	0	1	0	0	SS	miR395	conserved family	2.66667	n	7	n	0.0049734	n	6	n	0	n	3	AT3G22890,AT4G14680,AT5G43780	5	Drought,Nitrogen-deficiency,Phosphate-deficiency,SO2,Sulphur-deficiency	5	Drought,Nitrogen-deficiency,Phosphate-deficiency,SO2,Sulphur-deficiency	5	0.945419	0.505941
ath-miR395a	ath-miR395c	conserved	Seed plants	conserved	Seed plants	7	AT1G50930.2,AT2G28780.1,AT3G22890.1,AT4G14680.1,AT4G14680.2,AT5G10180.1,AT5G43780.1	7	0	0	1	0	0	SS	miR395	conserved family	2.66667	n	7	n	0.0049734	n	6	n	0	n	3	AT3G22890,AT4G14680,AT5G43780	5	Drought,Nitrogen-deficiency,Phosphate-deficiency,SO2,Sulphur-deficiency	6	Drought,Nitrogen-deficiency,Phosphate-deficiency,SO2,Salt,Sulphur-deficiency	5	0.945419	0.505941
ath-miR395a	ath-miR395d	conserved	Seed plants	conserved	Seed plants	10	AT1G50930.2,AT2G28780.1,AT3G22890.1,AT4G14680.1,AT4G14680.2,AT4G23840.1,AT5G10180.1,AT5G13630.1,AT5G13630.2,AT5G43780.1	10	0	0	1	0	0	SS	miR395	conserved family	2	n	7	n	0.0049734	n	7	n	0.0049734	n	4	AT3G22890,AT4G14680,AT5G13630,AT5G43780	5	Drought,Nitrogen-deficiency,Phosphate-deficiency,SO2,Sulphur-deficiency	5	Drought,Nitrogen-deficiency,Phosphate-deficiency,SO2,Sulphur-deficiency	5	1	1
ath-miR395a	ath-miR395e	conserved	Seed plants	conserved	Seed plants	10	AT1G50930.2,AT2G28780.1,AT3G22890.1,AT4G14680.1,AT4G14680.2,AT4G23840.1,AT5G10180.1,AT5G13630.1,AT5G13630.2,AT5G43780.1	10	0	0	1	0	0	SS	miR395	conserved family	2	n	7	n	0.0049734	n	7	n	0.0049734	n	4	AT3G22890,AT4G14680,AT5G13630,AT5G43780	5	Drought,Nitrogen-deficiency,Phosphate-deficiency,SO2,Sulphur-deficiency	6	Drought,Nitrogen-deficiency,Phosphate-deficiency,SO2,Salt,Sulphur-deficiency	5	1	1
ath-miR395a	ath-miR395f	conserved	Seed plants	conserved	Seed plants	7	AT1G50930.2,AT2G28780.1,AT3G22890.1,AT4G14680.1,AT4G14680.2,AT5G10180.1,AT5G43780.1	7	0	0	1	0	0	SS	miR395	conserved family	2.66667	n	7	n	0.0049734	n	6	n	0	n	3	AT3G22890,AT4G14680,AT5G43780	5	Drought,Nitrogen-deficiency,Phosphate-deficiency,SO2,Sulphur-deficiency	5	Drought,Nitrogen-deficiency,Phosphate-deficiency,SO2,Sulphur-deficiency	5	0.945419	0.505941
ath-miR395a	ath-miR832-3p	conserved	Seed plants	non-conserved	Arabidopsis thaliana	2	AT5G13630.1,AT5G13630.2	2	0	0	1	0	0	SS	interfamily		88	n	7	n	0.0049734	n	3	n	0	n	1	AT5G13630	5	Drought,Nitrogen-deficiency,Phosphate-deficiency,SO2,Sulphur-deficiency	0		0	0.480973
ath-miR395a	ath-miR838	conserved	Seed plants	conserved	Brassicaceae	1	AT5G10180.1	1	0	0	1	0	0	SS	interfamily		336	y	7	n	0.0049734	n	11	n	0.103315	y	0		5	Drought,Nitrogen-deficiency,Phosphate-deficiency,SO2,Sulphur-deficiency	0		0	0.389786	0.27918
ath-miR395b	ath-miR395c	conserved	Seed plants	conserved	Seed plants	9	AT1G50930.2,AT2G28780.1,AT3G22890.1,AT4G14680.1,AT4G14680.2,AT5G10180.1,AT5G20120.1,AT5G20120.2,AT5G43780.1	7	2	0	0.777778	0.222222	0	SS	miR395	conserved family	2	n	6	n	0	n	6	n	0	n	3	AT3G22890,AT4G14680,AT5G43780	5	Drought,Nitrogen-deficiency,Phosphate-deficiency,SO2,Sulphur-deficiency	6	Drought,Nitrogen-deficiency,Phosphate-deficiency,SO2,Salt,Sulphur-deficiency	5	1	1
ath-miR395b	ath-miR395d	conserved	Seed plants	conserved	Seed plants	7	AT1G50930.2,AT2G28780.1,AT3G22890.1,AT4G14680.1,AT4G14680.2,AT5G10180.1,AT5G43780.1	7	0	0	1	0	0	SS	miR395	conserved family	2.66667	n	6	n	0	n	7	n	0.0049734	n	3	AT3G22890,AT4G14680,AT5G43780	5	Drought,Nitrogen-deficiency,Phosphate-deficiency,SO2,Sulphur-deficiency	5	Drought,Nitrogen-deficiency,Phosphate-deficiency,SO2,Sulphur-deficiency	5	0.945419	0.505941
ath-miR395b	ath-miR395e	conserved	Seed plants	conserved	Seed plants	7	AT1G50930.2,AT2G28780.1,AT3G22890.1,AT4G14680.1,AT4G14680.2,AT5G10180.1,AT5G43780.1	7	0	0	1	0	0	SS	miR395	conserved family	2.66667	n	6	n	0	n	7	n	0.0049734	n	3	AT3G22890,AT4G14680,AT5G43780	5	Drought,Nitrogen-deficiency,Phosphate-deficiency,SO2,Sulphur-deficiency	6	Drought,Nitrogen-deficiency,Phosphate-deficiency,SO2,Salt,Sulphur-deficiency	5	0.945419	0.505941
ath-miR395b	ath-miR395f	conserved	Seed plants	conserved	Seed plants	9	AT1G50930.2,AT2G28780.1,AT3G22890.1,AT4G14680.1,AT4G14680.2,AT5G10180.1,AT5G20120.1,AT5G20120.2,AT5G43780.1	7	2	0	0.777778	0.222222	0	SS	miR395	conserved family	2	n	6	n	0	n	6	n	0	n	3	AT3G22890,AT4G14680,AT5G43780	5	Drought,Nitrogen-deficiency,Phosphate-deficiency,SO2,Sulphur-deficiency	5	Drought,Nitrogen-deficiency,Phosphate-deficiency,SO2,Sulphur-deficiency	5	1	1
ath-miR395b	ath-miR838	conserved	Seed plants	conserved	Brassicaceae	1	AT5G10180.1	1	0	0	1	0	0	SS	interfamily		252	n	6	n	0	n	11	n	0.103315	y	0		5	Drought,Nitrogen-deficiency,Phosphate-deficiency,SO2,Sulphur-deficiency	0		0	0.381587	0.421792
ath-miR395c	ath-miR395d	conserved	Seed plants	conserved	Seed plants	7	AT1G50930.2,AT2G28780.1,AT3G22890.1,AT4G14680.1,AT4G14680.2,AT5G10180.1,AT5G43780.1	7	0	0	1	0	0	SS	miR395	conserved family	2.66667	n	6	n	0	n	7	n	0.0049734	n	3	AT3G22890,AT4G14680,AT5G43780	6	Drought,Nitrogen-deficiency,Phosphate-deficiency,SO2,Salt,Sulphur-deficiency	5	Drought,Nitrogen-deficiency,Phosphate-deficiency,SO2,Sulphur-deficiency	5	0.945419	0.505941
ath-miR395c	ath-miR395e	conserved	Seed plants	conserved	Seed plants	7	AT1G50930.2,AT2G28780.1,AT3G22890.1,AT4G14680.1,AT4G14680.2,AT5G10180.1,AT5G43780.1	7	0	0	1	0	0	SS	miR395	conserved family	2.66667	n	6	n	0	n	7	n	0.0049734	n	3	AT3G22890,AT4G14680,AT5G43780	6	Drought,Nitrogen-deficiency,Phosphate-deficiency,SO2,Salt,Sulphur-deficiency	6	Drought,Nitrogen-deficiency,Phosphate-deficiency,SO2,Salt,Sulphur-deficiency	6	0.945419	0.505941
ath-miR395c	ath-miR395f	conserved	Seed plants	conserved	Seed plants	9	AT1G50930.2,AT2G28780.1,AT3G22890.1,AT4G14680.1,AT4G14680.2,AT5G10180.1,AT5G20120.1,AT5G20120.2,AT5G43780.1	7	2	0	0.777778	0.222222	0	SS	miR395	conserved family	2	n	6	n	0	n	6	n	0	n	3	AT3G22890,AT4G14680,AT5G43780	6	Drought,Nitrogen-deficiency,Phosphate-deficiency,SO2,Salt,Sulphur-deficiency	5	Drought,Nitrogen-deficiency,Phosphate-deficiency,SO2,Sulphur-deficiency	5	1	1
ath-miR395c	ath-miR838	conserved	Seed plants	conserved	Brassicaceae	1	AT5G10180.1	1	0	0	1	0	0	SS	interfamily		252	n	6	n	0	n	11	n	0.103315	y	0		6	Drought,Nitrogen-deficiency,Phosphate-deficiency,SO2,Salt,Sulphur-deficiency	0		0	0.381587	0.421792
ath-miR395d	ath-miR395e	conserved	Seed plants	conserved	Seed plants	10	AT1G50930.2,AT2G28780.1,AT3G22890.1,AT4G14680.1,AT4G14680.2,AT4G23840.1,AT5G10180.1,AT5G13630.1,AT5G13630.2,AT5G43780.1	10	0	0	1	0	0	SS	miR395	conserved family	2	n	7	n	0.0049734	n	7	n	0.0049734	n	4	AT3G22890,AT4G14680,AT5G13630,AT5G43780	5	Drought,Nitrogen-deficiency,Phosphate-deficiency,SO2,Sulphur-deficiency	6	Drought,Nitrogen-deficiency,Phosphate-deficiency,SO2,Salt,Sulphur-deficiency	5	1	1
ath-miR395d	ath-miR395f	conserved	Seed plants	conserved	Seed plants	7	AT1G50930.2,AT2G28780.1,AT3G22890.1,AT4G14680.1,AT4G14680.2,AT5G10180.1,AT5G43780.1	7	0	0	1	0	0	SS	miR395	conserved family	2.66667	n	7	n	0.0049734	n	6	n	0	n	3	AT3G22890,AT4G14680,AT5G43780	5	Drought,Nitrogen-deficiency,Phosphate-deficiency,SO2,Sulphur-deficiency	5	Drought,Nitrogen-deficiency,Phosphate-deficiency,SO2,Sulphur-deficiency	5	0.945419	0.505941
ath-miR395d	ath-miR832-3p	conserved	Seed plants	non-conserved	Arabidopsis thaliana	2	AT5G13630.1,AT5G13630.2	2	0	0	1	0	0	SS	interfamily		88	n	7	n	0.0049734	n	3	n	0	n	1	AT5G13630	5	Drought,Nitrogen-deficiency,Phosphate-deficiency,SO2,Sulphur-deficiency	0		0	0.480973
ath-miR395d	ath-miR838	conserved	Seed plants	conserved	Brassicaceae	1	AT5G10180.1	1	0	0	1	0	0	SS	interfamily		336	y	7	n	0.0049734	n	11	n	0.103315	y	0		5	Drought,Nitrogen-deficiency,Phosphate-deficiency,SO2,Sulphur-deficiency	0		0	0.389786	0.27918
ath-miR395e	ath-miR395f	conserved	Seed plants	conserved	Seed plants	7	AT1G50930.2,AT2G28780.1,AT3G22890.1,AT4G14680.1,AT4G14680.2,AT5G10180.1,AT5G43780.1	7	0	0	1	0	0	SS	miR395	conserved family	2.66667	n	7	n	0.0049734	n	6	n	0	n	3	AT3G22890,AT4G14680,AT5G43780	6	Drought,Nitrogen-deficiency,Phosphate-deficiency,SO2,Salt,Sulphur-deficiency	5	Drought,Nitrogen-deficiency,Phosphate-deficiency,SO2,Sulphur-deficiency	5	0.945419	0.505941
ath-miR395e	ath-miR832-3p	conserved	Seed plants	non-conserved	Arabidopsis thaliana	2	AT5G13630.1,AT5G13630.2	2	0	0	1	0	0	SS	interfamily		88	n	7	n	0.0049734	n	3	n	0	n	1	AT5G13630	6	Drought,Nitrogen-deficiency,Phosphate-deficiency,SO2,Salt,Sulphur-deficiency	0		0	0.480973
ath-miR395e	ath-miR838	conserved	Seed plants	conserved	Brassicaceae	1	AT5G10180.1	1	0	0	1	0	0	SS	interfamily		336	y	7	n	0.0049734	n	11	n	0.103315	y	0		6	Drought,Nitrogen-deficiency,Phosphate-deficiency,SO2,Salt,Sulphur-deficiency	0		0	0.389786	0.27918
ath-miR395f	ath-miR838	conserved	Seed plants	conserved	Brassicaceae	1	AT5G10180.1	1	0	0	1	0	0	SS	interfamily		252	n	6	n	0	n	11	n	0.103315	y	0		5	Drought,Nitrogen-deficiency,Phosphate-deficiency,SO2,Sulphur-deficiency	0		0	0.381587	0.421792
ath-miR396a-5p	ath-miR396b-5p	conserved	Vascular plants	conserved	Vascular plants	6	AT2G34530.1,AT2G34530.2,AT2G34530.3,AT2G34530.4,AT4G14200.1,AT5G43060.1	4	1	1	0.666667	0.166667	0.166667	SS	miR396	conserved family	4	n	2	n	1	y	1	n	0	n	1	AT5G43060	5	Cold,Drought,Lipopolysaccharide,Pectobacterium carotovorum,Salt	5	Cold,Drought,Lipopolysaccharide,Pectobacterium carotovorum,Salt	5	0.948835	0.848491
ath-miR396a-5p	ath-miR5663-3p	conserved	Vascular plants	non-conserved	Arabidopsis thaliana	1	AT1G10120.1	0	0	1	0	0	1	SD	interfamily		4	n	2	n	1	y	1	n	0	n	0		5	Cold,Drought,Lipopolysaccharide,Pectobacterium carotovorum,Salt	0		0	0.408698	0.432151
ath-miR397a	ath-miR397b	conserved	Seed plants	conserved	Seed plants	5	AT2G07280.1,AT2G29130.1,AT4G27820.1,AT4G27820.2,AT4G27820.3	0	4	1	0	0.8	0.2	DD	miR397	fam	2	n	1	n	0	n	1	n	0	n	2	AT2G29130,AT4G27820	3	Cold,Copper(Cu),Drought	3	Cold,Copper(Cu),Drought	3	0.59613	0.785462
ath-miR398a-3p	ath-miR398b-3p	conserved	Seed plants	conserved	Seed plants	1	AT5G14550.1	1	0	0	1	0	0	SS	miR398	conserved family	2	n	4	n	0	n	4	n	0	n	0		18	Aluminum excess,Cadmium,Carbon deficiency,Cold,Copper(Cu),Drought,Heat,High light,Lipopolysaccharide,Nitrogen-deficiency,Oxidative stress,Ozone,Pectobacterium carotovorum,Phosphate-deficiency,SO2,Salt,Sucrose,Ultraviolet B	18	Aluminum excess,Cadmium,Carbon deficiency,Cold,Copper(Cu),Drought,Heat,High light,Lipopolysaccharide,Nitrogen-deficiency,Oxidative stress,Ozone,Pectobacterium carotovorum,Phosphate-deficiency,SO2,Salt,Sucrose,Ultraviolet B	18	1	0.549701
ath-miR398a-3p	ath-miR398b-5p	conserved	Seed plants	conserved	Brassicaceae	1	AT5G14550.1	1	0	0	1	0	0	SS	miR398	conserved family	2	n	4	n	0	n	4	n	0	n	0		18	Aluminum excess,Cadmium,Carbon deficiency,Cold,Copper(Cu),Drought,Heat,High light,Lipopolysaccharide,Nitrogen-deficiency,Oxidative stress,Ozone,Pectobacterium carotovorum,Phosphate-deficiency,SO2,Salt,Sucrose,Ultraviolet B	17	Aluminum excess,Carbon deficiency,Cold,Copper(Cu),Drought,Heat,High light,Lipopolysaccharide,Nitrogen-deficiency,Oxidative stress,Ozone,Pectobacterium carotovorum,Phosphate-deficiency,SO2,Salt,Sucrose,Ultraviolet B	17	0.418783
ath-miR398a-3p	ath-miR398c-3p	conserved	Seed plants	conserved	Seed plants	1	AT5G14550.1	1	0	0	1	0	0	SS	miR398	conserved family	2	n	4	n	0	n	4	n	0	n	0		18	Aluminum excess,Cadmium,Carbon deficiency,Cold,Copper(Cu),Drought,Heat,High light,Lipopolysaccharide,Nitrogen-deficiency,Oxidative stress,Ozone,Pectobacterium carotovorum,Phosphate-deficiency,SO2,Salt,Sucrose,Ultraviolet B	17	Aluminum excess,Carbon deficiency,Cold,Copper(Cu),Drought,Heat,High light,Lipopolysaccharide,Nitrogen-deficiency,Oxidative stress,Ozone,Pectobacterium carotovorum,Phosphate-deficiency,SO2,Salt,Sucrose,Ultraviolet B	17	1	0.549701
ath-miR398a-3p	ath-miR398c-5p	conserved	Seed plants	conserved	Brassicaceae	1	AT5G14550.1	1	0	0	1	0	0	SS	miR398	conserved family	2	n	4	n	0	n	4	n	0	n	0		18	Aluminum excess,Cadmium,Carbon deficiency,Cold,Copper(Cu),Drought,Heat,High light,Lipopolysaccharide,Nitrogen-deficiency,Oxidative stress,Ozone,Pectobacterium carotovorum,Phosphate-deficiency,SO2,Salt,Sucrose,Ultraviolet B	17	Aluminum excess,Carbon deficiency,Cold,Copper(Cu),Drought,Heat,High light,Lipopolysaccharide,Nitrogen-deficiency,Oxidative stress,Ozone,Pectobacterium carotovorum,Phosphate-deficiency,SO2,Salt,Sucrose,Ultraviolet B	17	0.418783
ath-miR398b-3p	ath-miR398b-5p	conserved	Seed plants	conserved	Brassicaceae	1	AT5G14550.1	1	0	0	1	0	0	SS	miR398	conserved family	2	n	4	n	0	n	4	n	0	n	0		18	Aluminum excess,Cadmium,Carbon deficiency,Cold,Copper(Cu),Drought,Heat,High light,Lipopolysaccharide,Nitrogen-deficiency,Oxidative stress,Ozone,Pectobacterium carotovorum,Phosphate-deficiency,SO2,Salt,Sucrose,Ultraviolet B	17	Aluminum excess,Carbon deficiency,Cold,Copper(Cu),Drought,Heat,High light,Lipopolysaccharide,Nitrogen-deficiency,Oxidative stress,Ozone,Pectobacterium carotovorum,Phosphate-deficiency,SO2,Salt,Sucrose,Ultraviolet B	17	0.418783	0.58942
ath-miR398b-3p	ath-miR398c-3p	conserved	Seed plants	conserved	Seed plants	1	AT5G14550.1	1	0	0	1	0	0	SS	miR398	conserved family	2	n	4	n	0	n	4	n	0	n	0		18	Aluminum excess,Cadmium,Carbon deficiency,Cold,Copper(Cu),Drought,Heat,High light,Lipopolysaccharide,Nitrogen-deficiency,Oxidative stress,Ozone,Pectobacterium carotovorum,Phosphate-deficiency,SO2,Salt,Sucrose,Ultraviolet B	17	Aluminum excess,Carbon deficiency,Cold,Copper(Cu),Drought,Heat,High light,Lipopolysaccharide,Nitrogen-deficiency,Oxidative stress,Ozone,Pectobacterium carotovorum,Phosphate-deficiency,SO2,Salt,Sucrose,Ultraviolet B	17	1	1
ath-miR398b-3p	ath-miR398c-5p	conserved	Seed plants	conserved	Brassicaceae	1	AT5G14550.1	1	0	0	1	0	0	SS	miR398	conserved family	2	n	4	n	0	n	4	n	0	n	0		18	Aluminum excess,Cadmium,Carbon deficiency,Cold,Copper(Cu),Drought,Heat,High light,Lipopolysaccharide,Nitrogen-deficiency,Oxidative stress,Ozone,Pectobacterium carotovorum,Phosphate-deficiency,SO2,Salt,Sucrose,Ultraviolet B	17	Aluminum excess,Carbon deficiency,Cold,Copper(Cu),Drought,Heat,High light,Lipopolysaccharide,Nitrogen-deficiency,Oxidative stress,Ozone,Pectobacterium carotovorum,Phosphate-deficiency,SO2,Salt,Sucrose,Ultraviolet B	17	0.418783	0.58942
ath-miR398b-5p	ath-miR398c-3p	conserved	Brassicaceae	conserved	Seed plants	1	AT5G14550.1	1	0	0	1	0	0	SS	miR398	conserved family	2	n	4	n	0	n	4	n	0	n	0		17	Aluminum excess,Carbon deficiency,Cold,Copper(Cu),Drought,Heat,High light,Lipopolysaccharide,Nitrogen-deficiency,Oxidative stress,Ozone,Pectobacterium carotovorum,Phosphate-deficiency,SO2,Salt,Sucrose,Ultraviolet B	17	Aluminum excess,Carbon deficiency,Cold,Copper(Cu),Drought,Heat,High light,Lipopolysaccharide,Nitrogen-deficiency,Oxidative stress,Ozone,Pectobacterium carotovorum,Phosphate-deficiency,SO2,Salt,Sucrose,Ultraviolet B	17	0.418783	0.58942
ath-miR398b-5p	ath-miR398c-5p	conserved	Brassicaceae	conserved	Brassicaceae	11	AT2G04070.1,AT2G04090.1,AT2G04100.1,AT2G04100.2,AT3G09720.1,AT3G09720.2,AT4G19030.1,AT4G19030.2,AT4G19030.3,AT5G14550.1,AT5G37910.1	7	4	0	0.636364	0.363636	0	SS	miR398	conserved family	2	n	4	n	0	n	4	n	0	n	1	AT4G19030	17	Aluminum excess,Carbon deficiency,Cold,Copper(Cu),Drought,Heat,High light,Lipopolysaccharide,Nitrogen-deficiency,Oxidative stress,Ozone,Pectobacterium carotovorum,Phosphate-deficiency,SO2,Salt,Sucrose,Ultraviolet B	17	Aluminum excess,Carbon deficiency,Cold,Copper(Cu),Drought,Heat,High light,Lipopolysaccharide,Nitrogen-deficiency,Oxidative stress,Ozone,Pectobacterium carotovorum,Phosphate-deficiency,SO2,Salt,Sucrose,Ultraviolet B	17	1	1
ath-miR398c-3p	ath-miR398c-5p	conserved	Seed plants	conserved	Brassicaceae	1	AT5G14550.1	1	0	0	1	0	0	SS	miR398	conserved family	2	n	4	n	0	n	4	n	0	n	0		17	Aluminum excess,Carbon deficiency,Cold,Copper(Cu),Drought,Heat,High light,Lipopolysaccharide,Nitrogen-deficiency,Oxidative stress,Ozone,Pectobacterium carotovorum,Phosphate-deficiency,SO2,Salt,Sucrose,Ultraviolet B	17	Aluminum excess,Carbon deficiency,Cold,Copper(Cu),Drought,Heat,High light,Lipopolysaccharide,Nitrogen-deficiency,Oxidative stress,Ozone,Pectobacterium carotovorum,Phosphate-deficiency,SO2,Salt,Sucrose,Ultraviolet B	17	0.418783	0.58942
ath-miR399a	ath-miR399b	conserved	Seed plants	conserved	Seed plants	1	AT2G33770.1	1	0	0	1	0	0	SS	miR399	conserved family	129	n	5	n	0	n	6	n	0.0293777	y	1	AT2G33770	4	Cold,Nitrogen-deficiency,Pectobacterium carotovorum,Phosphate-deficiency	4	Cold,Nitrogen-deficiency,Pectobacterium carotovorum,Phosphate-deficiency	4	0.401821	0.652181
ath-miR399a	ath-miR399c-3p	conserved	Seed plants	conserved	Seed plants	1	AT2G33770.1	1	0	0	1	0	0	SS	miR399	conserved family	129	n	5	n	0	n	6	n	0.0293777	y	1	AT2G33770	4	Cold,Nitrogen-deficiency,Pectobacterium carotovorum,Phosphate-deficiency	4	Cold,Nitrogen-deficiency,Pectobacterium carotovorum,Phosphate-deficiency	4	0.401821	0.652181
ath-miR399a	ath-miR399d	conserved	Seed plants	conserved	Seed plants	1	AT2G33770.1	1	0	0	1	0	0	SS	miR399	conserved family	2	n	5	n	0	n	5	n	0	n	1	AT2G33770	4	Cold,Nitrogen-deficiency,Pectobacterium carotovorum,Phosphate-deficiency	4	Cold,Nitrogen-deficiency,Pectobacterium carotovorum,Phosphate-deficiency	4	0.721293	0.828649
ath-miR399a	ath-miR399e	conserved	Seed plants	conserved	Brassicaceae	2	AT2G33770.1,AT3G20940.1	1	0	1	0.5	0	0.5	NA	miR399	conserved family	2	n	5	n	0	n	5	n	0	n	1	AT2G33770	4	Cold,Nitrogen-deficiency,Pectobacterium carotovorum,Phosphate-deficiency	4	Cold,Nitrogen-deficiency,Pectobacterium carotovorum,Phosphate-deficiency	4	0.582299
ath-miR399a	ath-miR399f	conserved	Seed plants	conserved	Seed plants	1	AT2G33770.1	1	0	0	1	0	0	SS	miR399	conserved family	2	n	5	n	0	n	5	n	0	n	1	AT2G33770	4	Cold,Nitrogen-deficiency,Pectobacterium carotovorum,Phosphate-deficiency	5	Cold,Nitrogen-deficiency,Pectobacterium carotovorum,Phosphate-deficiency,Salt	4	0.744398	0.679365
ath-miR399b	ath-miR399c-3p	conserved	Seed plants	conserved	Seed plants	5	AT2G33770.1,AT3G06500.1,AT3G06500.2,AT3G54700.1,AT3G54700.2	5	0	0	1	0	0	SS	miR399	conserved family	2	n	6	n	0.0293777	y	6	n	0.0293777	y	2	AT3G06500,AT2G33770	4	Cold,Nitrogen-deficiency,Pectobacterium carotovorum,Phosphate-deficiency	4	Cold,Nitrogen-deficiency,Pectobacterium carotovorum,Phosphate-deficiency	4	1	1
ath-miR399b	ath-miR399d	conserved	Seed plants	conserved	Seed plants	1	AT2G33770.1	1	0	0	1	0	0	SS	miR399	conserved family	129	n	6	n	0.0293777	y	5	n	0	n	1	AT2G33770	4	Cold,Nitrogen-deficiency,Pectobacterium carotovorum,Phosphate-deficiency	4	Cold,Nitrogen-deficiency,Pectobacterium carotovorum,Phosphate-deficiency	4	0.556464	0.711149
ath-miR399b	ath-miR399e	conserved	Seed plants	conserved	Brassicaceae	1	AT2G33770.1	1	0	0	1	0	0	SS	miR399	conserved family	129	n	6	n	0.0293777	y	5	n	0	n	1	AT2G33770	4	Cold,Nitrogen-deficiency,Pectobacterium carotovorum,Phosphate-deficiency	4	Cold,Nitrogen-deficiency,Pectobacterium carotovorum,Phosphate-deficiency	4	0.448663
ath-miR399b	ath-miR399f	conserved	Seed plants	conserved	Seed plants	1	AT2G33770.1	1	0	0	1	0	0	SS	miR399	conserved family	129	n	6	n	0.0293777	y	5	n	0	n	1	AT2G33770	4	Cold,Nitrogen-deficiency,Pectobacterium carotovorum,Phosphate-deficiency	5	Cold,Nitrogen-deficiency,Pectobacterium carotovorum,Phosphate-deficiency,Salt	4	0.48302	0.415736
ath-miR399b	ath-miR5021	conserved	Seed plants	non-conserved	Arabidopsis thaliana	1	AT3G54700.1	0	0	1	0	0	1	SD	interfamily		762	y	6	n	0.0293777	y	54	y	0.660861	y	0		4	Cold,Nitrogen-deficiency,Pectobacterium carotovorum,Phosphate-deficiency	0		0	0.270573
ath-miR399c-3p	ath-miR399d	conserved	Seed plants	conserved	Seed plants	1	AT2G33770.1	1	0	0	1	0	0	SS	miR399	conserved family	129	n	6	n	0.0293777	y	5	n	0	n	1	AT2G33770	4	Cold,Nitrogen-deficiency,Pectobacterium carotovorum,Phosphate-deficiency	4	Cold,Nitrogen-deficiency,Pectobacterium carotovorum,Phosphate-deficiency	4	0.556464	0.711149
ath-miR399c-3p	ath-miR399e	conserved	Seed plants	conserved	Brassicaceae	1	AT2G33770.1	1	0	0	1	0	0	SS	miR399	conserved family	129	n	6	n	0.0293777	y	5	n	0	n	1	AT2G33770	4	Cold,Nitrogen-deficiency,Pectobacterium carotovorum,Phosphate-deficiency	4	Cold,Nitrogen-deficiency,Pectobacterium carotovorum,Phosphate-deficiency	4	0.448663
ath-miR399c-3p	ath-miR399f	conserved	Seed plants	conserved	Seed plants	1	AT2G33770.1	1	0	0	1	0	0	SS	miR399	conserved family	129	n	6	n	0.0293777	y	5	n	0	n	1	AT2G33770	4	Cold,Nitrogen-deficiency,Pectobacterium carotovorum,Phosphate-deficiency	5	Cold,Nitrogen-deficiency,Pectobacterium carotovorum,Phosphate-deficiency,Salt	4	0.48302	0.415736
ath-miR399c-3p	ath-miR5021	conserved	Seed plants	non-conserved	Arabidopsis thaliana	1	AT3G54700.1	0	0	1	0	0	1	SD	interfamily		762	y	6	n	0.0293777	y	54	y	0.660861	y	0		4	Cold,Nitrogen-deficiency,Pectobacterium carotovorum,Phosphate-deficiency	0		0	0.270573
ath-miR399d	ath-miR399e	conserved	Seed plants	conserved	Brassicaceae	1	AT2G33770.1	1	0	0	1	0	0	SS	miR399	conserved family	2	n	5	n	0	n	5	n	0	n	1	AT2G33770	4	Cold,Nitrogen-deficiency,Pectobacterium carotovorum,Phosphate-deficiency	4	Cold,Nitrogen-deficiency,Pectobacterium carotovorum,Phosphate-deficiency	4	0.735189
ath-miR399d	ath-miR399f	conserved	Seed plants	conserved	Seed plants	1	AT2G33770.1	1	0	0	1	0	0	SS	miR399	conserved family	2	n	5	n	0	n	5	n	0	n	1	AT2G33770	4	Cold,Nitrogen-deficiency,Pectobacterium carotovorum,Phosphate-deficiency	5	Cold,Nitrogen-deficiency,Pectobacterium carotovorum,Phosphate-deficiency,Salt	4	0.878318	0.395474
ath-miR399e	ath-miR399f	conserved	Brassicaceae	conserved	Seed plants	1	AT2G33770.1	1	0	0	1	0	0	SS	miR399	conserved family	2	n	5	n	0	n	5	n	0	n	1	AT2G33770	4	Cold,Nitrogen-deficiency,Pectobacterium carotovorum,Phosphate-deficiency	5	Cold,Nitrogen-deficiency,Pectobacterium carotovorum,Phosphate-deficiency,Salt	4	0.553164
ath-miR400	ath-miR5021	conserved	Brassicaceae	non-conserved	Arabidopsis thaliana	1	AT5G39710.1	1	0	0	1	0	0	SS	interfamily		1032	y	4	n	0.0447606	y	54	y	0.660861	y	0		0		0		0	0.374275
ath-miR400	ath-miR5652	conserved	Brassicaceae	non-conserved	Arabidopsis thaliana	2	AT1G63130.1,AT1G63130.2	2	0	0	1	0	0	SS	interfamily		260	n	4	n	0.0447606	y	3	n	0	n	0		0		0		0	0.526302	0.0681537
ath-miR403-3p	ath-miR865-3p	conserved	Eudicots	non-conserved	Arabidopsis thaliana	3	AT1G31290.1,AT1G31290.2,AT1G31290.3	3	0	0	1	0	0	SS	interfamily		264	y	1	n	0	n	2	n	0.0151515	y	0		1	Gamma-irradiated	0		0	0.432468
ath-miR406	ath-miR5021	non-conserved	Arabidopsis thaliana	non-conserved	Arabidopsis thaliana	1	AT1G03660.1	0	0	1	0	0	1	SD	interfamily		264	y	1	n	0	n	54	y	0.660861	y	0		0		0		0	0.337562
ath-miR408-3p	ath-miR408-5p	conserved	Land plants	conserved	Brassicaceae	1	AT2G47020.1	1	0	0	1	0	0	SS	miR408	conserved family	2	n	1	n	0	n	1	n	0	n	0		9	Cold,Copper(Cu),Drought,Lipopolysaccharide,Osmotic stress,Oxidative stress,Pectobacterium carotovorum,Salt,Sucrose	0		0	0.378467	0.546218
ath-miR414	ath-miR5021	conserved	Flowering plants	non-conserved	Arabidopsis thaliana	36	AT1G65470.1,AT1G70320.1,AT2G16920.1,AT2G16920.2,AT2G19090.1,AT2G28480.1,AT2G33400.1,AT2G40670.1,AT3G18970.1,AT3G23900.1,AT3G23900.3,AT3G23900.4,AT3G24760.1,AT3G27290.1,AT3G28007.1,AT3G43600.1,AT3G50240.1,AT3G50240.2,AT3G50240.3,AT3G50240.4,AT3G55660.1,AT3G55660.2,AT3G61780.1,AT4G26110.1,AT4G26110.2,AT4G31510.1,AT5G22010.1,AT5G28320.1,AT5G28400.1,AT5G49680.2,AT5G62950.3,AT5G62950.4,AT5G62950.6,AT5…	18	0	18	0.5	0	0.5	NA	interfamily		610.199	y	13	y	0.0806334	y	54	y	0.660861	y	5	AT5G63950,AT3G28007,AT2G40670,AT3G43600,AT5G22010	0		0		0	0.728158
ath-miR414	ath-miR5643a	conserved	Flowering plants	non-conserved	Arabidopsis thaliana	2	AT3G55660.1,AT3G55660.2	0	0	2	0	0	1	SD	interfamily		73.6143	n	13	y	0.0806334	y	3	n	0	n	0		0		0		0	0.551994
ath-miR414	ath-miR5643b	conserved	Flowering plants	non-conserved	Arabidopsis thaliana	2	AT3G55660.1,AT3G55660.2	0	0	2	0	0	1	SD	interfamily		73.6143	n	13	y	0.0806334	y	3	n	0	n	0		0		0		0	0.551994
ath-miR414	ath-miR5658	conserved	Flowering plants	non-conserved	Arabidopsis thaliana	14	AT2G29620.1,AT2G29620.2,AT2G29620.3,AT2G29620.4,AT2G29620.5,AT2G29620.6,AT2G40670.1,AT4G04630.1,AT4G18770.1,AT4G27320.2,AT5G03545.1,AT5G35100.1,AT5G35100.3,AT5G41410.1	9	0	5	0.642857	0	0.357143	SS	interfamily		624.5	y	13	y	0.0806334	y	46	y	0.431559	y	4	AT4G27320,AT2G40670,AT5G03545,AT5G41410	0		0		0	0.718274
ath-miR414	ath-miR8181	conserved	Flowering plants	non-conserved	Arabidopsis thaliana	1	AT1G55430.1	0	1	0	0	1	0	DD	interfamily		264	y	13	y	0.0806334	y	1	n	0	n	0		0		0		0	0.46922
ath-miR414	ath-miR822-5p	conserved	Flowering plants	non-conserved	Arabidopsis thaliana	1	AT2G13900.1	0	0	1	0	0	1	SD	interfamily		264	y	13	y	0.0806334	y	1	n	0	n	0		0		0		0	1
ath-miR414	ath-miR831-5p	conserved	Flowering plants	non-conserved	Arabidopsis thaliana	2	AT5G44200.1,AT5G44200.2	0	0	2	0	0	1	SD	interfamily		264	y	13	y	0.0806334	y	1	n	0	n	1	AT5G44200	0		0		0	0.459871
ath-miR414	ath-miR838	conserved	Flowering plants	conserved	Brassicaceae	6	AT5G22640.1,AT5G22640.2,AT5G22640.3,AT5G46030.1,AT5G46030.2,AT5G46030.3	3	0	3	0.5	0	0.5	NA	interfamily		266.642	y	13	y	0.0806334	y	11	n	0.103315	y	0		0		0		0	0.650798
ath-miR414	ath-miR841a-3p	conserved	Flowering plants	non-conserved	Arabidopsis thaliana	3	AT3G61780.1,AT5G28320.1,AT5G28400.1	0	0	3	0	0	1	SD	interfamily		74.6143	n	13	y	0.0806334	y	2	n	0	n	0		0		0		0	0.496975
ath-miR414	ath-miR866-5p	conserved	Flowering plants	non-conserved	Arabidopsis thaliana	2	AT4G33240.2,AT4G33240.6	0	0	2	0	0	1	SD	interfamily		376.506	y	13	y	0.0806334	y	2	n	0.00800983	n	0		0		1	Phosphate-deficiency	0	0.542792
ath-miR415	ath-miR5021	non-conserved	Arabidopsis thaliana	non-conserved	Arabidopsis thaliana	5	AT1G02030.1,AT1G65920.2,AT4G34710.1,AT5G17580.1,AT5G17580.2	2	0	3	0.4	0	0.6	SD	interfamily		463.985	y	3	n	0.0151515	y	54	y	0.660861	y	3	AT5G17580,AT4G34710,AT1G65920	0		0		0	0.557166
ath-miR415	ath-miR5029	non-conserved	Arabidopsis thaliana	non-conserved	Arabidopsis thaliana	1	AT2G30070.2	0	0	1	0	0	1	SD	interfamily		264	y	3	n	0.0151515	y	1	n	0	n	0		0		0		0	0.338531
ath-miR415	ath-miR838	non-conserved	Arabidopsis thaliana	conserved	Brassicaceae	2	AT5G17580.1,AT5G17580.2	2	0	0	1	0	0	SS	interfamily		60.015	n	3	n	0.0151515	y	11	n	0.103315	y	1	AT5G17580	0		0		0	0.543245
ath-miR4221	ath-miR5649b	non-conserved	Arabidopsis thaliana	non-conserved	Arabidopsis thaliana	5	AT1G76280.1,AT1G76280.2,AT1G76280.3,AT1G76280.4,AT1G76280.5	0	0	5	0	0	1	SD	interfamily		524	y	2	n	0.0300717	y	2	n	0.0151515	y	0		0		0		0	1
ath-miR4221	ath-miR5658	non-conserved	Arabidopsis thaliana	non-conserved	Arabidopsis thaliana	1	AT5G41070.1	0	0	1	0	0	1	SD	interfamily		780	y	2	n	0.0300717	y	46	y	0.431559	y	1	AT5G41070	0		0		0	0.534978
ath-miR4243	ath-miR774a	conserved	Brassicaceae	non-conserved	Arabidopsis thaliana	1	AT3G19890.1	0	0	1	0	0	1	SD	interfamily		262	n	4	n	0.0300717	y	2	n	0	n	0		0		0		0	0.434018	0.544958
ath-miR4243	ath-miR843	conserved	Brassicaceae	non-conserved	Arabidopsis thaliana	1	AT3G13830.1	1	0	0	1	0	0	SS	interfamily		6	n	4	n	0.0300717	y	2	n	0	n	0		0		1	SO2	0	0.580535	-0.433286
ath-miR4243	ath-miR859	conserved	Brassicaceae	non-conserved	Arabidopsis thaliana	3	AT3G13830.1,AT5G36730.1,AT5G36820.1	3	0	0	1	0	0	SS	interfamily		774	y	4	n	0.0300717	y	8	n	0.0891742	y	0		0		0		0	0.758613	0.640579
ath-miR447a-3p	ath-miR447b	non-conserved	Arabidopsis thaliana	non-conserved	Arabidopsis thaliana	2	AT5G60760.1,AT5G60760.2	0	0	2	0	0	1	SD	miR447	non-conserved family	2	n	2	n	0	n	2	n	0	n	0		0		0		0	1	1
ath-miR447a-3p	ath-miR5021	non-conserved	Arabidopsis thaliana	non-conserved	Arabidopsis thaliana	3	AT3G45090.1,AT3G45090.2,AT5G60760.1	0	0	3	0	0	1	SD	interfamily		262	n	2	n	0	n	54	y	0.660861	y	1	AT3G45090	0		0		0	0.0608094
ath-miR447a.2-3p	ath-miR5021	non-conserved	Arabidopsis thaliana	non-conserved	Arabidopsis thaliana	2	AT1G54710.1,AT1G54710.2	0	0	2	0	0	1	SD	interfamily		264	y	1	n	0	n	54	y	0.660861	y	1	AT1G54710	0		0		0	0.36372
ath-miR447b	ath-miR5021	non-conserved	Arabidopsis thaliana	non-conserved	Arabidopsis thaliana	2	AT3G45090.1,AT3G45090.2	0	0	2	0	0	1	SD	interfamily		262	n	2	n	0	n	54	y	0.660861	y	1	AT3G45090	0		0		0	0.0608094
ath-miR5012	ath-miR5021	non-conserved	Arabidopsis thaliana	non-conserved	Arabidopsis thaliana	2	AT3G09010.1,AT3G09010.2	0	0	2	0	0	1	SD	interfamily		264	y	1	n	0	n	54	y	0.660861	y	1	AT3G09010	0		0		0	0.394337
ath-miR5014a-3p	ath-miR5014a-5p	non-conserved	Arabidopsis thaliana	non-conserved	Arabidopsis thaliana	1	AT1G65960.3	0	0	1	0	0	1	SD	miR5014	non-conserved family	2	n	2	n	0	n	2	n	0	n	1	AT1G65960	0		0		0	0.383502	-0.690769
ath-miR5014a-3p	ath-miR5021	non-conserved	Arabidopsis thaliana	non-conserved	Arabidopsis thaliana	1	AT1G65960.3	1	0	0	1	0	0	SS	interfamily		262	n	2	n	0	n	54	y	0.660861	y	1	AT1G65960	0		0		0	0.33789
ath-miR5014a-5p	ath-miR5021	non-conserved	Arabidopsis thaliana	non-conserved	Arabidopsis thaliana	1	AT1G65960.3	0	0	1	0	0	1	SD	interfamily		262	n	2	n	0	n	54	y	0.660861	y	1	AT1G65960	0		0		0	0.408637
ath-miR5015	ath-miR5021	non-conserved	Arabidopsis thaliana	non-conserved	Arabidopsis thaliana	1	AT3G20770.1	1	0	0	1	0	0	SS	interfamily		264	y	1	n	0	n	54	y	0.660861	y	1	AT3G20770	0		0		0	0.556294
ath-miR5017-3p	ath-miR5017-5p	non-conserved	Arabidopsis thaliana	non-conserved	Arabidopsis thaliana	1	AT4G22760.1	1	0	0	1	0	0	SS	miR5017	non-conserved family	2	n	1	n	0	n	1	n	0	n	0		0		0		0	0.46044	0.715452
ath-miR5020a	ath-miR830-5p	non-conserved	Arabidopsis thaliana	non-conserved	Arabidopsis thaliana	2	AT3G45850.1,AT3G45850.2	2	0	0	1	0	0	SS	interfamily		2	n	1	n	0	n	1	n	0	n	0		0		0		0	0.528149	-0.143773
ath-miR5021	ath-miR5633	non-conserved	Arabidopsis thaliana	non-conserved	Arabidopsis thaliana	1	AT4G00450.2	0	0	1	0	0	1	SD	interfamily		264	y	54	y	0.660861	y	1	n	0	n	0		0		0		0	0.534312
ath-miR5021	ath-miR5641	non-conserved	Arabidopsis thaliana	non-conserved	Arabidopsis thaliana	3	AT1G77680.1,AT4G22190.1,AT5G58320.4	2	0	1	0.666667	0	0.333333	SS	interfamily		1524	y	54	y	0.660861	y	2	n	0.0734444	y	0		0		0		0	0.611888
ath-miR5021	ath-miR5643a	non-conserved	Arabidopsis thaliana	non-conserved	Arabidopsis thaliana	2	AT3G55660.1,AT3G55660.2	0	0	2	0	0	1	SD	interfamily		188.386	n	54	y	0.660861	y	3	n	0	n	0		0		0		0	0.511767
ath-miR5021	ath-miR5643b	non-conserved	Arabidopsis thaliana	non-conserved	Arabidopsis thaliana	2	AT3G55660.1,AT3G55660.2	0	0	2	0	0	1	SD	interfamily		188.386	n	54	y	0.660861	y	3	n	0	n	0		0		0		0	0.511767
ath-miR5021	ath-miR5658	non-conserved	Arabidopsis thaliana	non-conserved	Arabidopsis thaliana	20	AT1G14440.1,AT1G45160.1,AT1G45160.2,AT1G79950.5,AT1G79950.6,AT1G79950.7,AT2G01290.1,AT2G23300.1,AT2G27770.1,AT2G31070.1,AT2G40670.1,AT3G23140.1,AT3G26570.2,AT3G44820.1,AT3G62660.1,AT4G18770.1,AT4G18820.1,AT4G36930.1,AT5G52500.1,AT5G53350.1	7	0	13	0.35	0	0.65	SD	interfamily		3660.74	y	54	y	0.660861	y	46	y	0.431559	y	8	AT1G45160,AT3G44820,AT2G23300,AT5G53350,AT4G36930,AT2G40670,AT3G26570,AT2G31070	0		0		0	0.703314
ath-miR5021	ath-miR773b-5p	non-conserved	Arabidopsis thaliana	non-conserved	Arabidopsis thaliana	2	AT3G22220.1,AT3G22220.2	0	0	2	0	0	1	SD	interfamily		264	y	54	y	0.660861	y	1	n	0	n	0		0		0		0	0.456797
ath-miR5021	ath-miR779.1	non-conserved	Arabidopsis thaliana	non-conserved	Arabidopsis thaliana	1	AT2G19130.1	0	0	1	0	0	1	SD	interfamily		264	y	54	y	0.660861	y	1	n	0	n	1	AT2G19130	0		0		0	0.457616
ath-miR5021	ath-miR780.2	non-conserved	Arabidopsis thaliana	non-conserved	Arabidopsis thaliana	2	AT5G41610.1,AT5G41610.2	0	0	2	0	0	1	SD	interfamily		520	y	54	y	0.660861	y	3	n	0.0151515	y	0		0		0		0	0.362814
ath-miR5021	ath-miR8166	non-conserved	Arabidopsis thaliana	non-conserved	Arabidopsis thaliana	3	AT3G52180.1,AT3G52180.2,AT3G52180.3	0	0	3	0	0	1	SD	interfamily		264	y	54	y	0.660861	y	1	n	0	n	0		0		0		0	0.468949
ath-miR5021	ath-miR8169	non-conserved	Arabidopsis thaliana	non-conserved	Arabidopsis thaliana	1	AT5G66320.2	0	0	1	0	0	1	SD	interfamily		264	y	54	y	0.660861	y	1	n	0	n	0		0		0		0	0.301195
ath-miR5021	ath-miR838	non-conserved	Arabidopsis thaliana	conserved	Brassicaceae	6	AT1G75430.1,AT1G75430.2,AT5G17580.1,AT5G17580.2,AT5G17910.1,AT5G17910.3	3	0	3	0.5	0	0.5	NA	interfamily		1156.31	y	54	y	0.660861	y	11	n	0.103315	y	1	AT5G17580	0		0		0	0.590954
ath-miR5021	ath-miR841a-3p	non-conserved	Arabidopsis thaliana	non-conserved	Arabidopsis thaliana	3	AT3G61780.1,AT5G28320.1,AT5G28400.1	0	0	3	0	0	1	SD	interfamily		189.386	n	54	y	0.660861	y	2	n	0	n	0		0		0		0	0.422913
ath-miR5021	ath-miR856	non-conserved	Arabidopsis thaliana	non-conserved	Arabidopsis thaliana	1	AT5G41610.1	1	0	0	1	0	0	SS	interfamily		260	n	54	y	0.660861	y	2	n	0	n	0		0		0		0	0.431308
ath-miR5021	ath-miR865-3p	non-conserved	Arabidopsis thaliana	non-conserved	Arabidopsis thaliana	1	AT5G67450.1	0	0	1	0	0	1	SD	interfamily		524	y	54	y	0.660861	y	2	n	0.0151515	y	1	AT5G67450	0		0		0	0.569023
ath-miR5595a	ath-miR5995b	non-conserved	Arabidopsis thaliana	non-conserved	Arabidopsis thaliana	13	AT2G23550.1,AT2G23550.2,AT2G23550.3,AT2G23550.4,AT2G23560.1,AT2G23570.1,AT2G23580.1,AT2G23580.2,AT2G23610.1,AT2G23610.2,AT4G34490.1,AT4G34490.2,AT4G37150.1	7	0	6	0.538462	0	0.461538	SS	miR5595/5995	non-conserved family	2	n	1	n	0	n	1	n	0	n	4	AT2G23610,AT2G23560,AT4G34490,AT4G37150	0		0		0	1	0.597762
ath-miR5630a	ath-miR5630b	non-conserved	Arabidopsis thaliana	non-conserved	Arabidopsis thaliana	5	AT1G33120.1,AT1G33140.1,AT4G09010.1,AT4G09010.2,AT4G09010.3	5	0	0	1	0	0	SS	miR5630	non-conserved family	2	n	1	n	0	n	1	n	0	n	1	AT4G09010	0		0		0	1
ath-miR5635a	ath-miR5635b	non-conserved	Arabidopsis thaliana	non-conserved	Arabidopsis thaliana	2	AT4G10440.1,AT5G19200.1	0	2	0	0	1	0	DD	miR5635	non-conserved family	2	n	3	n	0	n	3	n	0	n	0		0		0		0	1	1
ath-miR5635a	ath-miR5635c	non-conserved	Arabidopsis thaliana	non-conserved	Arabidopsis thaliana	2	AT4G10440.1,AT5G19200.1	0	2	0	0	1	0	DD	miR5635	non-conserved family	2	n	3	n	0	n	3	n	0	n	0		0		0		0	1	1
ath-miR5635a	ath-miR5635d	non-conserved	Arabidopsis thaliana	non-conserved	Arabidopsis thaliana	2	AT4G10440.1,AT5G19200.1	0	2	0	0	1	0	DD	miR5635	non-conserved family	2	n	3	n	0	n	3	n	0	n	0		0		0		0	1	1
ath-miR5635b	ath-miR5635c	non-conserved	Arabidopsis thaliana	non-conserved	Arabidopsis thaliana	2	AT4G10440.1,AT5G19200.1	0	2	0	0	1	0	DD	miR5635	non-conserved family	2	n	3	n	0	n	3	n	0	n	0		0		0		0	1	1
ath-miR5635b	ath-miR5635d	non-conserved	Arabidopsis thaliana	non-conserved	Arabidopsis thaliana	2	AT4G10440.1,AT5G19200.1	0	2	0	0	1	0	DD	miR5635	non-conserved family	2	n	3	n	0	n	3	n	0	n	0		0		0		0	1	1
ath-miR5635c	ath-miR5635d	non-conserved	Arabidopsis thaliana	non-conserved	Arabidopsis thaliana	2	AT4G10440.1,AT5G19200.1	0	2	0	0	1	0	DD	miR5635	non-conserved family	2	n	3	n	0	n	3	n	0	n	0		0		0		0	1	1
ath-miR5641	ath-miR5645f	non-conserved	Arabidopsis thaliana	non-conserved	Arabidopsis thaliana	2	AT2G33480.1,AT2G33480.3	0	0	2	0	0	1	SD	interfamily		1280	y	2	n	0.0734444	y	5	n	0.0593338	y	1	AT2G33480	0		0		0	0.445083	0.0316939
ath-miR5643a	ath-miR5643b	non-conserved	Arabidopsis thaliana	non-conserved	Arabidopsis thaliana	5	AT1G38790.1,AT2G07981.1,AT2G08986.1,AT3G55660.1,AT3G55660.2	2	2	1	0.4	0.4	0.2	NA	miR5643	non-conserved family	2	n	3	n	0	n	3	n	0	n	0		0		0		0	1	1
ath-miR5645a	ath-miR5645b	non-conserved	Arabidopsis thaliana	non-conserved	Arabidopsis thaliana	3	AT1G54590.1,AT2G33480.1,AT2G33480.3	0	3	0	0	1	0	DD	miR5645	non-conserved family	3	n	4	n	0.00011566	n	3	n	0	n	1	AT2G33480	0		0		0	1	1
ath-miR5645a	ath-miR5645d	non-conserved	Arabidopsis thaliana	non-conserved	Arabidopsis thaliana	3	AT1G54590.1,AT2G33480.1,AT2G33480.3	0	3	0	0	1	0	DD	miR5645	non-conserved family	3	n	4	n	0.00011566	n	3	n	0	n	1	AT2G33480	0		0		0	1	1
ath-miR5645a	ath-miR5645e	non-conserved	Arabidopsis thaliana	non-conserved	Arabidopsis thaliana	3	AT1G54590.1,AT2G33480.1,AT2G33480.3	0	3	0	0	1	0	DD	miR5645	non-conserved family	4	n	4	n	0.00011566	n	2	n	0	n	1	AT2G33480	0		0		0	1	1
ath-miR5645a	ath-miR5645f	non-conserved	Arabidopsis thaliana	non-conserved	Arabidopsis thaliana	5	AT1G54590.1,AT2G33480.1,AT2G33480.3,AT5G60920.1,AT5G60920.2	0	2	3	0	0.4	0.6	SD	miR5645	non-conserved family	258	n	4	n	0.00011566	n	5	n	0.0593338	y	2	AT2G33480,AT5G60920	0		0		0	1	1
ath-miR5645b	ath-miR5645d	non-conserved	Arabidopsis thaliana	non-conserved	Arabidopsis thaliana	2	AT2G33480.1,AT2G33480.3	0	2	0	0	1	0	DD	miR5645	non-conserved family	2	n	3	n	0	n	3	n	0	n	1	AT2G33480	0		0		0	1	1
ath-miR5645b	ath-miR5645f	non-conserved	Arabidopsis thaliana	non-conserved	Arabidopsis thaliana	3	AT1G54590.1,AT2G33480.1,AT2G33480.3	0	0	3	0	0	1	SD	miR5645	non-conserved family	259	n	3	n	0	n	5	n	0.0593338	y	1	AT2G33480	0		0		0	1	1
ath-miR5645d	ath-miR5645f	non-conserved	Arabidopsis thaliana	non-conserved	Arabidopsis thaliana	3	AT1G54590.1,AT2G33480.1,AT2G33480.3	0	0	3	0	0	1	SD	miR5645	non-conserved family	259	n	3	n	0	n	5	n	0.0593338	y	1	AT2G33480	0		0		0	1	1
ath-miR5645e	ath-miR5645f	non-conserved	Arabidopsis thaliana	non-conserved	Arabidopsis thaliana	3	AT1G54590.1,AT2G33480.1,AT2G33480.3	0	0	3	0	0	1	SD	miR5645	non-conserved family	260	n	2	n	0	n	5	n	0.0593338	y	1	AT2G33480	0		0		0	1	1
ath-miR5649a	ath-miR5649b	non-conserved	Arabidopsis thaliana	non-conserved	Arabidopsis thaliana	10	AT1G56500.1,AT1G56500.2,AT1G76280.1,AT1G76280.2,AT1G76280.3,AT1G76280.4,AT1G76280.5,AT2G32590.1,AT5G06350.1,AT5G06350.2	0	3	7	0	0.3	0.7	SD	miR5649	non-conserved family	264	y	1	n	0	n	2	n	0.0151515	y	0		0		0		0	1	1
ath-miR5650	ath-miR870-5p	non-conserved	Arabidopsis thaliana	non-conserved	Arabidopsis thaliana	1	AT1G66880.2	1	0	0	1	0	0	SS	interfamily		2	n	1	n	0	n	1	n	0	n	1	AT1G66880	0		0		0	0.495419	-0.457156
ath-miR5658	ath-miR5998a	non-conserved	Arabidopsis thaliana	non-conserved	Arabidopsis thaliana	2	AT1G05490.1,AT3G26740.1	1	0	1	0.5	0	0.5	NA	interfamily		262	n	46	y	0.431559	y	2	n	0	n	1	AT3G26740	0		0		0	0.517141	0.286231
ath-miR5658	ath-miR5998b	non-conserved	Arabidopsis thaliana	non-conserved	Arabidopsis thaliana	1	AT1G05490.1	0	0	1	0	0	1	SD	interfamily		262	n	46	y	0.431559	y	2	n	0	n	0		0		0		0	0.517141	0.286231
ath-miR5658	ath-miR773a	non-conserved	Arabidopsis thaliana	non-conserved	Arabidopsis thaliana	3	AT1G79950.5,AT1G79950.6,AT1G79950.7	0	0	3	0	0	1	SD	interfamily		1280	y	46	y	0.431559	y	3	n	0.0595651	y	0		0		0		0	0.542637	-0.0185535
ath-miR5658	ath-miR835-3p	non-conserved	Arabidopsis thaliana	non-conserved	Arabidopsis thaliana	1	AT1G32360.1	0	0	1	0	0	1	SD	interfamily		264	y	46	y	0.431559	y	1	n	0	n	0		0		0		0	0.435615	-0.176599
ath-miR5658	ath-miR835-5p	non-conserved	Arabidopsis thaliana	conserved	Brassicaceae	1	AT5G55500.1	1	0	0	1	0	0	SS	interfamily		264	y	46	y	0.431559	y	1	n	0	n	0		0		0		0	0.416555
ath-miR5658	ath-miR847	non-conserved	Arabidopsis thaliana	conserved	Brassicaceae	1	AT1G74620.1	0	0	1	0	0	1	SD	interfamily		264	y	46	y	0.431559	y	1	n	0	n	0		0		0		0	0.569675	0.44143
ath-miR5662	ath-miR859	non-conserved	Arabidopsis thaliana	non-conserved	Arabidopsis thaliana	1	AT3G22710.1	0	0	1	0	0	1	SD	interfamily		264	y	1	n	0	n	8	n	0.0891742	y	0		0		0		0	0.557419
ath-miR5998a	ath-miR5998b	non-conserved	Arabidopsis thaliana	non-conserved	Arabidopsis thaliana	30	AT1G04890.1,AT1G05490.1,AT1G23560.2,AT1G46696.1,AT1G71910.1,AT1G71910.2,AT2G13370.1,AT2G13370.2,AT2G13370.3,AT2G13690.1,AT2G18370.1,AT2G21520.1,AT2G21520.2,AT3G22600.1,AT3G22860.1,AT3G25740.1,AT3G25740.2,AT3G26740.1,AT3G47590.1,AT4G14650.1,AT4G33010.1,AT4G33010.2,AT4G33950.2,AT4G34960.2,AT5G01880.1,AT5G09480.1,AT5G44660.1,AT5G44660.2,AT5G54760.1,AT5G54760.3	6	16	8	0.2	0.533333	0.266667	DD	miR5998	non-conserved family	2	n	2	n	0	n	2	n	0	n	6	AT3G22600,AT4G33010,AT3G26740,AT4G33950,AT3G47590,AT5G09480	0		0		0	1	1
ath-miR773a	ath-miR773b-3p	non-conserved	Arabidopsis thaliana	non-conserved	Arabidopsis thaliana	2	AT4G07350.1,AT4G15870.1	0	2	0	0	1	0	DD	miR773	non-conserved family	264	y	3	n	0.0595651	y	1	n	0	n	0		0		0		0	0.672175
ath-miR773a	ath-miR846-3p	non-conserved	Arabidopsis thaliana	conserved	Brassicaceae	5	AT1G33790.2,AT1G33790.3,AT1G33790.4,AT1G33790.5,AT1G33790.6	0	0	5	0	0	1	SD	interfamily		780	y	3	n	0.0595651	y	2	n	0.0300717	y	0		0		1	Nitrogen-deficiency	0	0.410358	0.437424
ath-miR774b-3p	ath-miR859	non-conserved	Arabidopsis thaliana	non-conserved	Arabidopsis thaliana	1	AT3G17570.1	0	0	1	0	0	1	SD	interfamily		264	y	1	n	0	n	8	n	0.0891742	y	0		0		0		0	0.624809
ath-miR780.1	ath-miR780.2	non-conserved	Arabidopsis thaliana	non-conserved	Arabidopsis thaliana	1	AT4G14810.1	1	0	0	1	0	0	SS	miR780	non-conserved family	264	y	1	n	0	n	3	n	0.0151515	y	0		0		0		0	0.559724	0.816073
ath-miR780.2	ath-miR856	non-conserved	Arabidopsis thaliana	non-conserved	Arabidopsis thaliana	2	AT5G41610.1,AT5G41610.3	0	0	2	0	0	1	SD	interfamily		4	n	3	n	0.0151515	y	2	n	0	n	0		0		0		0	0.515601	0.807033
ath-miR781a	ath-miR781b	conserved	Brassicaceae	conserved	Brassicaceae	10	AT1G44900.1,AT1G44900.2,AT1G52820.1,AT1G52820.2,AT5G23480.1,AT5G23480.2,AT5G23480.3,AT5G23480.4,AT5G23480.5,AT5G23480.6	6	2	2	0.6	0.2	0.2	SS	miR781	conserved family	2	n	1	n	0	n	1	n	0	n	0		0		0		0	1	1
ath-miR842	ath-miR846-3p	conserved	Brassicaceae	conserved	Brassicaceae	5	AT1G57570.1,AT5G28520.1,AT5G28520.2,AT5G38550.1,AT5G38550.2	5	0	0	1	0	0	SS	interfamily		524	y	2	n	0.0151515	y	2	n	0.0300717	y	0		0		1	Nitrogen-deficiency	0	0.70668	0.761615
ath-miR843	ath-miR859	non-conserved	Arabidopsis thaliana	non-conserved	Arabidopsis thaliana	2	AT1G11810.1,AT3G13830.1	2	0	0	1	0	0	SS	interfamily		258	n	2	n	0	n	8	n	0.0891742	y	0		1	SO2	0		0	0.585702	-0.395921
ath-miR854a	ath-miR854b	conserved	Rosids	conserved	Rosids	27	AT1G15530.1,AT1G49290.1,AT1G50732.1,AT1G53560.1,AT1G53770.1,AT1G53770.2,AT1G80440.1,AT3G10630.1,AT3G28830.1,AT3G56110.1,AT3G56110.2,AT3G56110.3,AT3G56110.4,AT4G00680.1,AT4G00680.2,AT4G11590.1,AT4G17710.1,AT4G23210.1,AT4G23210.2,AT4G23210.3,AT4G23210.4,AT4G23210.5,AT4G37180.1,AT5G03080.1,AT5G05100.1,AT5G19590.1,AT5G19590.2	12	15	0	0.444444	0.555556	0	DD	miR854	conserved family	2	n	4	n	0	n	4	n	0	n	5	AT1G15530,AT4G23210,AT1G80440,AT4G37180,AT3G10630	1	Heat	0		0	1	1
ath-miR854a	ath-miR854c	conserved	Rosids	conserved	Rosids	27	AT1G15530.1,AT1G49290.1,AT1G50732.1,AT1G53560.1,AT1G53770.1,AT1G53770.2,AT1G80440.1,AT3G10630.1,AT3G28830.1,AT3G56110.1,AT3G56110.2,AT3G56110.3,AT3G56110.4,AT4G00680.1,AT4G00680.2,AT4G11590.1,AT4G17710.1,AT4G23210.1,AT4G23210.2,AT4G23210.3,AT4G23210.4,AT4G23210.5,AT4G37180.1,AT5G03080.1,AT5G05100.1,AT5G19590.1,AT5G19590.2	12	15	0	0.444444	0.555556	0	DD	miR854	conserved family	2	n	4	n	0	n	4	n	0	n	5	AT1G15530,AT4G23210,AT1G80440,AT4G37180,AT3G10630	1	Heat	0		0	1	1
ath-miR854a	ath-miR854d	conserved	Rosids	conserved	Rosids	27	AT1G15530.1,AT1G49290.1,AT1G50732.1,AT1G53560.1,AT1G53770.1,AT1G53770.2,AT1G80440.1,AT3G10630.1,AT3G28830.1,AT3G56110.1,AT3G56110.2,AT3G56110.3,AT3G56110.4,AT4G00680.1,AT4G00680.2,AT4G11590.1,AT4G17710.1,AT4G23210.1,AT4G23210.2,AT4G23210.3,AT4G23210.4,AT4G23210.5,AT4G37180.1,AT5G03080.1,AT5G05100.1,AT5G19590.1,AT5G19590.2	12	15	0	0.444444	0.555556	0	DD	miR854	conserved family	2	n	4	n	0	n	4	n	0	n	5	AT1G15530,AT4G23210,AT1G80440,AT4G37180,AT3G10630	1	Heat	0		0	1	1
ath-miR854a	ath-miR854e	conserved	Rosids	conserved	Rosids	27	AT1G15530.1,AT1G49290.1,AT1G50732.1,AT1G53560.1,AT1G53770.1,AT1G53770.2,AT1G80440.1,AT3G10630.1,AT3G28830.1,AT3G56110.1,AT3G56110.2,AT3G56110.3,AT3G56110.4,AT4G00680.1,AT4G00680.2,AT4G11590.1,AT4G17710.1,AT4G23210.1,AT4G23210.2,AT4G23210.3,AT4G23210.4,AT4G23210.5,AT4G37180.1,AT5G03080.1,AT5G05100.1,AT5G19590.1,AT5G19590.2	12	15	0	0.444444	0.555556	0	DD	miR854	conserved family	2	n	4	n	0	n	4	n	0	n	5	AT1G15530,AT4G23210,AT1G80440,AT4G37180,AT3G10630	1	Heat	0		0	1	1
ath-miR854b	ath-miR854c	conserved	Rosids	conserved	Rosids	27	AT1G15530.1,AT1G49290.1,AT1G50732.1,AT1G53560.1,AT1G53770.1,AT1G53770.2,AT1G80440.1,AT3G10630.1,AT3G28830.1,AT3G56110.1,AT3G56110.2,AT3G56110.3,AT3G56110.4,AT4G00680.1,AT4G00680.2,AT4G11590.1,AT4G17710.1,AT4G23210.1,AT4G23210.2,AT4G23210.3,AT4G23210.4,AT4G23210.5,AT4G37180.1,AT5G03080.1,AT5G05100.1,AT5G19590.1,AT5G19590.2	12	15	0	0.444444	0.555556	0	DD	miR854	conserved family	2	n	4	n	0	n	4	n	0	n	5	AT1G15530,AT4G23210,AT1G80440,AT4G37180,AT3G10630	0		0		0	1	1
ath-miR854b	ath-miR854d	conserved	Rosids	conserved	Rosids	27	AT1G15530.1,AT1G49290.1,AT1G50732.1,AT1G53560.1,AT1G53770.1,AT1G53770.2,AT1G80440.1,AT3G10630.1,AT3G28830.1,AT3G56110.1,AT3G56110.2,AT3G56110.3,AT3G56110.4,AT4G00680.1,AT4G00680.2,AT4G11590.1,AT4G17710.1,AT4G23210.1,AT4G23210.2,AT4G23210.3,AT4G23210.4,AT4G23210.5,AT4G37180.1,AT5G03080.1,AT5G05100.1,AT5G19590.1,AT5G19590.2	12	15	0	0.444444	0.555556	0	DD	miR854	conserved family	2	n	4	n	0	n	4	n	0	n	5	AT1G15530,AT4G23210,AT1G80440,AT4G37180,AT3G10630	0		0		0	1	1
ath-miR854b	ath-miR854e	conserved	Rosids	conserved	Rosids	27	AT1G15530.1,AT1G49290.1,AT1G50732.1,AT1G53560.1,AT1G53770.1,AT1G53770.2,AT1G80440.1,AT3G10630.1,AT3G28830.1,AT3G56110.1,AT3G56110.2,AT3G56110.3,AT3G56110.4,AT4G00680.1,AT4G00680.2,AT4G11590.1,AT4G17710.1,AT4G23210.1,AT4G23210.2,AT4G23210.3,AT4G23210.4,AT4G23210.5,AT4G37180.1,AT5G03080.1,AT5G05100.1,AT5G19590.1,AT5G19590.2	12	15	0	0.444444	0.555556	0	DD	miR854	conserved family	2	n	4	n	0	n	4	n	0	n	5	AT1G15530,AT4G23210,AT1G80440,AT4G37180,AT3G10630	0		0		0	1	1
ath-miR854c	ath-miR854d	conserved	Rosids	conserved	Rosids	27	AT1G15530.1,AT1G49290.1,AT1G50732.1,AT1G53560.1,AT1G53770.1,AT1G53770.2,AT1G80440.1,AT3G10630.1,AT3G28830.1,AT3G56110.1,AT3G56110.2,AT3G56110.3,AT3G56110.4,AT4G00680.1,AT4G00680.2,AT4G11590.1,AT4G17710.1,AT4G23210.1,AT4G23210.2,AT4G23210.3,AT4G23210.4,AT4G23210.5,AT4G37180.1,AT5G03080.1,AT5G05100.1,AT5G19590.1,AT5G19590.2	12	15	0	0.444444	0.555556	0	DD	miR854	conserved family	2	n	4	n	0	n	4	n	0	n	5	AT1G15530,AT4G23210,AT1G80440,AT4G37180,AT3G10630	0		0		0	1	1
ath-miR854c	ath-miR854e	conserved	Rosids	conserved	Rosids	27	AT1G15530.1,AT1G49290.1,AT1G50732.1,AT1G53560.1,AT1G53770.1,AT1G53770.2,AT1G80440.1,AT3G10630.1,AT3G28830.1,AT3G56110.1,AT3G56110.2,AT3G56110.3,AT3G56110.4,AT4G00680.1,AT4G00680.2,AT4G11590.1,AT4G17710.1,AT4G23210.1,AT4G23210.2,AT4G23210.3,AT4G23210.4,AT4G23210.5,AT4G37180.1,AT5G03080.1,AT5G05100.1,AT5G19590.1,AT5G19590.2	12	15	0	0.444444	0.555556	0	DD	miR854	conserved family	2	n	4	n	0	n	4	n	0	n	5	AT1G15530,AT4G23210,AT1G80440,AT4G37180,AT3G10630	0		0		0	1	1
ath-miR854d	ath-miR854e	conserved	Rosids	conserved	Rosids	27	AT1G15530.1,AT1G49290.1,AT1G50732.1,AT1G53560.1,AT1G53770.1,AT1G53770.2,AT1G80440.1,AT3G10630.1,AT3G28830.1,AT3G56110.1,AT3G56110.2,AT3G56110.3,AT3G56110.4,AT4G00680.1,AT4G00680.2,AT4G11590.1,AT4G17710.1,AT4G23210.1,AT4G23210.2,AT4G23210.3,AT4G23210.4,AT4G23210.5,AT4G37180.1,AT5G03080.1,AT5G05100.1,AT5G19590.1,AT5G19590.2	12	15	0	0.444444	0.555556	0	DD	miR854	conserved family	2	n	4	n	0	n	4	n	0	n	5	AT1G15530,AT4G23210,AT1G80440,AT4G37180,AT3G10630	0		0		0	1	1
ath-miR858a	ath-miR858b	conserved	Seed plants	conserved	Seed plants	12	AT1G06180.1,AT1G66230.1,AT1G79180.1,AT1G79180.2,AT2G26950.1,AT2G47460.1,AT3G08500.1,AT3G30210.1,AT4G12350.1,AT5G35550.1,AT5G35550.2,AT5G49330.1	11	1	0	0.916667	0.0833333	0	SS	miR858	conserved family	2	n	1	n	0	n	1	n	0	n	5	AT2G47460,AT1G06180,AT5G35550,AT3G30210,AT1G79180	0		0		0	0.931971	0.984765
ath-miR859	ath-miR866-5p	non-conserved	Arabidopsis thaliana	non-conserved	Arabidopsis thaliana	1	AT3G13820.1	0	0	1	0	0	1	SD	interfamily		164.506	n	8	n	0.0891742	y	2	n	0.00800983	n	0		0		1	Phosphate-deficiency	0	0.587419	0.342911

## Sheet: Table S5
Supplementary Table S5. Conservation preference for the ‘final’, ‘deleted’ and ‘unfiltered’ miRNA pairs. The observed number of miRNA pairs in different conservations in the real network was compared to the expected numbers in the 1,000 randomized networks with the same degree and age distributions with the real one. The enrichment was calculated using the Z-score and adjusted P-value for multipl…
miRNA pair dataset	Conservationa	Observed number	Expected number	Standard deviation	Z-score	Adjusted P-valueb
Final	CS~CS	341	196	28.9	5	3.9E-07**
Final	Non-CS~CS	93	239.2	15	-9.7	3.1E-22**
Final	Non-CS~non-CS	72	70.8	17.9	0.1	0.47
Deleted	CS~CS	53	65.7	20.9	-0.6	0.27
Deleted	Non-CS~CS	138	155.4	8.6	-2	0.063
Deleted	Non-CS~non-CS	121	90.9	23.8	1.3	0.15
Unfiltered	CS~CS	394	217.881	44.1	4	4.9E-05**
Unfiltered	Non-CS~CS	231	410.389	14	-12.8	1.4E-37**
Unfiltered	Non-CS~non-CS	193	189.73	40.1	0.1	0.47
a CS~CS indicates conserved and conserved miRNA pairs; Non-CS~CS indicates non-conserved and conserved miRNA pairs; Non-CS~Non-CS indicates non-conserved and non-conserved miRNA pairs.
b Significant result was denoted with *.

## Sheet: Table S6
Supplementary Table S6. Examples of six conserved families, which contain 11 to 93 cooperative homologous miRNA pairs, comprising 40% to 100% of all possible intra-family member pairs.
MiRNA family	Family size	Number of conserved miRNAs	Number of non-conserved miRNAs	Number of possible intra-family miRNA pairs	Number of cooperative homologous miRNA pairs	Proportion of cooperative homologous miRNA pairs (%)
ath-miR156/157	22	22	0	231	93	40.3
ath-miR159/319	7	7	0	21	15	71.4
ath-miR165/166	13	13	0	78	36	46.1
ath-miR169	18	17	1	153	91	59.5
ath-miR172	8	8	0	28	11	39.3
ath-miR395	6	6	0	15	15	100

## Sheet: Table S7
Supplementary Table S7. 24 SD- and 8 DD-type miRNA-miRNA pairs that respond to the identical type of stress. See the detailed information in Supplementary Table S4.
miRNA1	miRNA2	Conservation1	Conservation2	Num of common targets	Common target transcripts	Cooperation type for the miRNA-miRNA pair	miRNA family or interfamily	Num of stress genes this miRNA pair co- regulates	List of stress genes	Num of stress types miRNA1 responds to	Stress types miRNA1 responds to	Num of stress types miRNA2 responds to	Stress types miRNA2 responds to	Num of identical types of stress the miRNA pair is involved in	PPImiRFS	Expression correlation
ath-miR156d-3p	ath-miR156f-3p	conserved	conserved	1	AT1G72820.1	DD	miR156/157	1	AT1G72820	8	Cold,Drought,Heat,Lipopolysaccharide,Pectobacterium carotovorum,Phosphate-deficiency,Salt,Sulphur-deficiency	8	Cold,Drought,Heat,Lipopolysaccharide,Pectobacterium carotovorum,Phosphate-deficiency,Salt,Sulphur-deficiency	8	0.403872	0.387599
ath-miR156j	ath-miR2111a-5p	conserved	conserved	2	AT3G27150.1,AT3G27150.2	SD	interfamily	1	AT3G27150	8	Cold,Drought,Heat,Lipopolysaccharide,Pectobacterium carotovorum,Phosphate-deficiency,Salt,Sulphur-deficiency	1	Phosphate-deficiency	1	0.420843	0.152169
[truncated: 22 more rows]

## Sheet: Table S8
Supplementary Table S8. Examples of two miRNA families, miR854 and miR172, in which the DD miRNA-miRNA crosstalk cooperatively regulate stress genes.
[truncated: 12 more rows]

[truncated: 3 more sheets: Table S9, Table S10, Table S11]
